# Supplementary material for: Ladostigil Attenuates Induced Oxidative Stress in Human Neuroblast-like SH-SY5Y Cells
Source: Biomedicines. 2021 Sep 17;9(9):1251. doi: 10.3390/biomedicines9091251 (PMC8471141; doi:10.3390/biomedicines9091251)
Supplement: Supplementary file 1 [file biomedicines-09-01251-s001.zip › BioMed-LADO-Sup(round2) Table S1-FINAL.xlsx]

## Sheet: MTT
Supplemental Table S1. RNA-seq normalized data (MTT) with all controls
ensemblID	gene_name	NT_10h_1	NT_10h_2	NT_10h_3	sin1_26h_1	sin1_26h_2	sin1_26h_3	sin1_Lado_26h_1	sin1_Lado_26h_2	sin1_Lado_26h_3
ENSG00000210082.2	MT-RNR2	14099.7	14219.8	14993	15176.2	14909	15632.8	15943.9	15403.8	14164
ENSG00000198804.2	MT-CO1	10433.4	10301.8	10586.1	11279.5	11160.5	11263.7	12268.1	11959.9	11482.7
ENSG00000198886.2	MT-ND4	10045.4	9984.13	10736	11321.6	11325.4	11746.5	13302.5	12311.4	11662.5
ENSG00000143248.13	RGS5	8022.34	8204.68	8172.14	9057.9	9329.93	9693.83	8682.32	10013.3	9470.41
ENSG00000198938.2	MT-CO3	6779.89	6757.97	6888.69	7542.75	7171.78	7378.12	8117.88	7933.3	7594.49
ENSG00000198888.2	MT-ND1	5955.58	5793.25	6011.44	5647.15	5569.23	5686.99	6519.07	5818.47	5466.39
ENSG00000198712.1	MT-CO2	4181.84	4160.38	4430.05	4868.93	4756.57	4872.53	5527.7	5133.78	4840.15
ENSG00000198786.2	MT-ND5	4271.76	4288.27	4496.67	4625.96	4529.43	4527.36	5123.35	4629.93	4333.2
ENSG00000198727.2	MT-CYB	4084.04	4073.32	4241.26	4632.26	4508.33	4560.65	5264.88	4818.12	4528.1
ENSG00000198899.2	MT-ATP6	3916.09	3909.93	4141.24	4403.87	4379.85	4538.05	5272.47	4746.32	4534.09
ENSG00000198763.3	MT-ND2	3408.92	3338.89	3384.69	3737.06	3612.47	3637.79	4348.29	3887.81	3651.75
ENSG00000075624.17	ACTB	4109.06	3985.18	3518.96	2150.68	2157.6	1971.26	2060.18	2023.93	2081.77
ENSG00000156508.19	EEF1A1	2826.1	2875.98	2835.6	3185.63	3129.72	3126.57	3256.95	3275.22	3179.07
ENSG00000167658.16	EEF2	2711.41	2737.3	2650.79	3236.41	3217.74	3101.88	3126.98	3316.47	3154.68
ENSG00000196230.14	TUBB	2508.45	2493.72	2376.55	2505.12	2468.53	2331.98	2407.04	2474.06	2516
ENSG00000229807.12	XIST	2183.24	2259.96	2147.3	2201.3	2421.78	2571.61	2222.23	2251.17	2338.2
ENSG00000122566.22	HNRNPA2B1	2018.5	1979.07	2132.85	2061.27	2053.74	2129.79	2207.63	2074.18	2119.88
ENSG00000251562.8	MALAT1	1609.58	1939.03	1944.57	2306.9	2089.91	2335.06	2343.01	2580.94	2030.48
ENSG00000111640.15	GAPDH	1808.5	1833	1707.93	1948.16	1893.31	1848.63	1832.89	1980.44	1947.23
ENSG00000087460.28	GNAS	1791.92	1784.22	1717.68	1811.34	1792.11	1716.34	1722.12	1776.86	1752.03
ENSG00000153187.20	HNRNPU	1742.58	1739.07	1742.72	1706.62	1713.14	1729.16	1840.42	1744.79	1738.05
ENSG00000080824.19	HSP90AA1	1897.21	1872.53	1880.24	1387.45	1382.74	1401.94	1370.83	1411.21	1423.74
ENSG00000109971.14	HSPA8	2010.43	1975.44	1954.76	1022.9	1021.74	986.701	893.192	935.724	906.619
ENSG00000184009.13	ACTG1	2021.38	1962.89	1674.3	1150.05	1158.63	1037.63	1044.89	1119.82	1127.31
ENSG00000096384.20	HSP90AB1	1592.1	1586.7	1563.24	1537.25	1457.47	1448.9	1461.88	1525.66	1504.26
ENSG00000110092.4	CCND1	1703.02	1615.66	1585.43	1433.2	1416.9	1329.99	1326.28	1329.18	1362.28
ENSG00000069275.13	NUCKS1	1419.16	1405.36	1377.14	1580.08	1543.65	1522.44	1585.82	1586.01	1571.16
ENSG00000174444.15	RPL4	1412.06	1417.12	1360.11	1559.85	1511.71	1463.6	1456.65	1610.65	1554.47
ENSG00000131711.15	MAP1B	1473.12	1498.73	1395.02	1429.61	1449.5	1411.26	1431.59	1387.38	1382.7
ENSG00000104435.14	STMN2	1245.07	1241.18	1245.74	1659.6	1618.66	1626.14	1662.45	1655.28	1648.54
ENSG00000253729.8	PRKDC	1355.61	1350.73	1260.87	1315.5	1319.44	1278.8	1240.34	1266.85	1261.41
ENSG00000198034.11	RPS4X	1242.64	1267.13	1272.97	1411.76	1391.2	1371.43	1387.96	1452.21	1398.84
ENSG00000070756.17	PABPC1	1210.83	1237.37	1255.71	1429.61	1443.37	1425.02	1501.15	1458.97	1409.01
ENSG00000133112.17	TPT1	1190.28	1188.14	1178.66	1416.9	1315.16	1328.53	1358.07	1420.81	1378.82
ENSG00000117724.13	CENPF	1146.51	1214.49	1143.19	1256.48	1473.04	1675.92	1442.8	1628.23	1621.93
ENSG00000135486.19	HNRNPA1	1189.71	1187	1212.57	1351.25	1338.1	1328.88	1425.09	1406.86	1381.96
ENSG00000094916.16	CBX5	1285.78	1265.54	1214.25	1186.14	1178.97	1096.47	1140.6	1156.58	1159.39
ENSG00000148773.14	MKI67	1144.2	1168.54	1128.23	1340.14	1420.48	1431.17	1331.17	1354.92	1366.46
ENSG00000143933.19	CALM2	1140.75	1155.94	1138.49	1135.46	1128.21	1123.78	1153.83	1124.93	1149.84
ENSG00000164684.13	ZNF704	1120.26	1103.12	1084.36	1291.9	1304.85	1255.81	1217.63	1249.27	1265.55
ENSG00000108654.16	DDX5	1022.79	1051.95	1098.42	1199.12	1169.05	1215	1256.61	1277.45	1272.03
ENSG00000211459.2	MT-RNR1	1041.09	1172.12	1355.01	1071.86	940.607	1140.65	1214.01	1100.76	929.006
ENSG00000197102.13	DYNC1H1	1106.89	1121.01	1072.48	1123.31	1128.86	1088.23	1078.18	1066.48	1050.75
ENSG00000167978.17	SRRM2	1037.12	1054.11	1138.15	1133.92	1152.51	1187.78	1143.77	1111.58	1136.71
ENSG00000137154.13	RPS6	1054.08	1061.83	1085.64	1135.57	1107.76	1108.86	1168.94	1161.36	1125.2
ENSG00000204628.12	RACK1	1020.48	1025.6	982.481	1178.18	1131.84	1116.51	1096.23	1225.47	1190.92
ENSG00000065978.19	YBX1	1051.84	1036.84	1056.79	1050.31	1037.63	1027.55	1134.51	1045.22	1020.37
ENSG00000116560.11	SFPQ	969.278	985.22	1010	1108.39	1111.83	1108.61	1185.5	1133.81	1139.11
ENSG00000167552.15	TUBA1A	1027.97	1034.23	1043.67	1009.25	995.656	974.48	1040.93	1016.66	1005.75
ENSG00000242265.6	PEG10	1120.14	1103.74	1058.86	863.81	865.491	822.279	836.283	804.246	836.682
ENSG00000129351.17	ILF3	1007.74	1017.25	1061.77	985.048	984.213	980.975	1014.08	1012.6	999.571
ENSG00000161016.18	RPL8	1006.46	1026.68	974.58	1028.81	1017.46	997.426	1039.09	1036.56	1011.19
ENSG00000212907.2	MT-ND4L	877.369	884.585	948.355	1123.91	1076.47	1137.71	1263.62	1153.96	1087.2
ENSG00000117632.23	STMN1	950.333	945.92	959.507	1055.39	1025.16	992.854	1052.31	1047.55	1068.92
ENSG00000187514.17	PTMA	999.168	992.716	1006.13	960.016	936.214	932.691	1046.1	958.756	942.734
ENSG00000110321.19	EIF4G2	994.24	991.864	972.451	985.104	949.665	932.52	937.053	937.71	971.301
ENSG00000115053.17	NCL	1012.16	984.652	1020.75	956.369	937.733	929.016	987.524	947.008	945.435
ENSG00000231500.7	RPS18	917.691	938.424	904.983	1061.91	993.541	989.991	961.713	1061.66	1022.96
ENSG00000142534.7	RPS11	903.674	937.742	897.867	1062.58	980.796	1010.24	1086.11	1047.13	1011.38
ENSG00000108424.11	KPNB1	982.847	948.192	966.287	915.09	892.826	894.662	904.804	915.438	901.808
ENSG00000100316.16	RPL3	905.53	921.613	883.802	978.417	947.17	945.382	949.527	1007.23	983.438
ENSG00000131747.15	TOP2A	852.727	857.439	860.267	1092.47	1117.52	1114.29	1048.4	1113.82	1137.7
ENSG00000115306.16	SPTBN1	882.361	903.27	885.987	972.836	963.874	951.919	1046.45	927.482	948.544
ENSG00000142541.18	RPL13A	856.055	881.802	824.347	1001.57	958.776	942.006	973.325	1036.26	1005.49
ENSG00000144028.15	SNRNP200	868.728	880.496	873.659	941.173	951.943	922.65	918.198	953.896	927.378
ENSG00000142937.12	RPS8	862.328	871.807	855.728	967.973	923.848	910.857	888.421	975.534	948.322
ENSG00000123416.15	TUBA1B	935.548	926.725	872.875	849.664	855.783	795.317	849.102	842.789	858.699
ENSG00000140988.16	RPS2	883.833	888.617	841.943	917.245	901.015	878.041	911.587	958.714	927.526
ENSG00000174231.17	PRPF8	921.787	914.628	885.427	858.616	852.746	826.424	826.28	840.127	837.571
ENSG00000108298.12	RPL19	828.277	847.898	819.192	957.695	898.358	912.395	930.557	969.618	947.581
ENSG00000169045.17	HNRNPH1	858.615	866.185	954.912	839.717	861.369	908.506	928.085	884.671	897.775
ENSG00000117152.14	RGS4	644.33	680.249	706.616	1274.11	1247.26	1281.45	1140.49	1339.58	1239.8
ENSG00000074800.16	ENO1	906.554	890.094	851.805	851.874	821.126	790.019	808	840.507	829.763
ENSG00000149273.15	RPS3	826.997	832.564	806.64	939.239	896.026	882.1	881.005	948.952	925.934
ENSG00000165119.21	HNRNPK	843.638	835.347	835.835	894.313	881.274	860.778	915.496	891.602	893.52
ENSG00000089157.16	RPLP0	801.972	822.626	779.799	922.827	881.816	860.863	874.107	924.313	913.501
ENSG00000164107.9	HAND2	783.795	781.338	806.416	980.572	944.566	959.269	941.134	942.612	920.273
ENSG00000009307.16	CSDE1	821.941	821.035	823.955	884.919	878.616	882.613	902.619	888.221	887.266
ENSG00000179348.12	GATA2	872.44	844.945	801.485	888.953	886.643	863.256	843.526	827.955	822.88
ENSG00000198840.2	MT-ND3	780.722	780.941	772.682	894.202	833.275	838.217	979.764	897.138	884.084
ENSG00000123454.12	DBH	961.662	956.54	861.78	599.837	623.112	598.635	565.704	654.174	590.98
ENSG00000067225.19	PKM	845.559	825.92	788.372	803.357	792.87	772.927	800.757	787.764	783.028
ENSG00000079246.16	XRCC5	825.269	802.692	770.385	781.087	769.548	747.46	772.762	786.2	787.246
ENSG00000141367.12	CLTC	828.661	811.438	790.894	781.805	764.938	744.512	686.306	737.05	733.776
ENSG00000196628.20	TCF4	760.177	749.876	758.281	846.956	860.881	863.427	830.879	863.667	873.168
ENSG00000122406.14	RPL5	737.52	753.737	743.319	833.528	799.161	802.325	803.976	859.145	824.73
ENSG00000142676.14	RPL11	737.968	757.145	757.104	833.307	805.181	834.158	866.232	862.188	821.363
ENSG00000108953.17	YWHAE	801.46	780.6	774.475	781.75	768.03	730.839	758.219	759.491	777.773
ENSG00000228253.1	MT-ATP8	617.256	638.791	726.789	978.583	847.919	928.076	1028.74	961.208	910.726
ENSG00000166598.16	HSP90B1	972.799	955.859	945.049	465.889	468.812	485.146	460.277	478.744	481.857
ENSG00000136485.15	DCAF7	792.883	789.63	760.41	775.616	762.986	732.377	715.853	747.066	750.169
ENSG00000134308.14	YWHAQ	787.251	782.531	780.303	723.562	718.404	709.09	747.182	721.709	724.562
ENSG00000078369.18	GNB1	784.563	766.743	770.945	738.427	723.123	704.304	718.44	749.982	731.63
ENSG00000167526.14	RPL13	740.016	754.078	681.679	785.342	767.759	732.249	729.592	809.402	784.767
ENSG00000187109.15	NAP1L1	733.999	727.841	737.155	798.494	786.253	782.199	805.931	811.389	799.531
ENSG00000143799.14	PARP1	788.915	788.324	769.6	688.915	685.754	668.497	689.985	680.123	691.148
ENSG00000147140.17	NONO	705.261	704.045	706.447	781.861	777.087	764.851	802.137	791.526	793.278
ENSG00000072501.19	SMC1A	758.193	748.626	764.501	709.25	708.316	681.7	705.621	688.279	696.403
ENSG00000170027.7	YWHAG	739.184	728.863	721.969	713.671	690.69	676.103	678.201	694.915	694.849
ENSG00000148303.17	RPL7A	697.069	701.262	689.917	785.011	735.488	747.46	775.119	778.593	764.526
ENSG00000119335.17	SET	737.712	712.677	709.137	710.798	711.028	697.809	723.441	705.226	711.056
ENSG00000169710.9	FASN	748.272	728.181	718.495	656.036	664.711	636.835	630.316	659.076	629.057
ENSG00000172757.13	CFL1	757.873	741.357	694.344	645.702	624.089	597.225	643.48	636.044	647.78
ENSG00000089280.19	FUS	714.67	715.971	758.785	663.883	648.115	669.779	693.261	657.175	671.759
ENSG00000089009.16	RPL6	666.859	665.54	668.567	732.901	710.865	708.15	713.898	750.193	722.86
ENSG00000117523.16	PRRC2C	700.077	715.801	708.521	701.514	701.754	725.498	734.018	691.111	691.888
ENSG00000137818.12	RPLP1	676.268	683.486	645.592	706.929	687.327	669.48	667.911	707.593	722.86
ENSG00000145592.14	RPL37	642.601	646.401	650.075	735.056	690.147	705.885	700.907	758.139	724.34
ENSG00000162374.18	ELAVL4	763.569	738.688	741.582	593.593	607.655	595.43	583.236	590.147	613.108
ENSG00000171863.15	RPS7	666.923	673.661	651.756	703.669	683.639	669.352	655.207	723.272	703.914
ENSG00000237125.11	HAND2-AS1	586.726	582.511	629.51	772.025	792.707	809.674	765.347	843.973	836.941
ENSG00000125691.14	RPL23	622.888	632.828	641.726	746.163	702.188	703.748	747.067	731.218	717.68
ENSG00000173726.11	TOMM20	662.763	666.676	663.244	676.261	657.226	645.551	650.723	692.886	692.554
ENSG00000135829.17	DHX9	692.909	698.366	673.61	614.757	621.377	611.24	622.038	620.829	600.083
ENSG00000091129.21	NRCAM	662.123	656.908	640.437	729.309	731.312	722.25	711.656	696.351	727.301
ENSG00000170144.21	HNRNPA3	683.372	671.674	689.693	642.221	642.637	645.167	654.919	662.626	659.658
ENSG00000197694.18	SPTAN1	646.442	659.975	645.032	676.316	676.751	675.675	675.211	651.047	633.682
ENSG00000277443.3	MARCKS	618.28	617.267	603.285	711.019	704.9	654.567	723.728	717.905	728.337
ENSG00000008196.13	TFAP2B	580.005	587.225	627.885	766.112	761.033	791.044	733.328	810.332	767.449
ENSG00000131149.19	GSE1	752.112	730.055	705.495	535.903	563.996	537.105	553	514.794	526.891
ENSG00000184347.15	SLIT3	698.669	711.314	676.524	592.377	599.14	594.319	582.087	589.048	582.581
ENSG00000137497.18	NUMA1	599.399	603.013	607.712	732.128	727.787	739.983	765.232	733.88	719.863
ENSG00000075618.18	FSCN1	685.164	658.441	615.893	616.526	619.641	573.04	591.744	633.973	621.471
ENSG00000127022.16	CANX	731.247	715.29	690.869	520.596	515.184	486.3	517.187	511.286	506.058
ENSG00000215301.11	DDX3X	600.103	586.146	611.634	676.979	670.352	679.307	703.724	698.634	704.692
ENSG00000124422.12	USP22	625.832	613.065	605.078	669.243	657.335	637.347	642.445	665.923	675.274
ENSG00000154229.12	PRKCA	691.629	697.855	664.364	568.395	570.992	575.647	597.09	557.225	565.041
ENSG00000086758.16	HUWE1	622.056	616.699	613.932	678.305	667.585	655.764	638.191	638.072	628.058
ENSG00000166441.13	RPL27A	594.918	598.583	583.224	695.601	644.915	656.746	675.786	683.292	679.085
ENSG00000114867.22	EIF4G1	682.284	657.078	657.08	568.34	556.077	541.848	573.751	547.166	531.775
ENSG00000164104.12	HMGB2	549.091	545.483	566.693	736.217	727.57	720.327	781.155	750.151	746.246
ENSG00000147274.14	RBMX	588.838	592.62	602.164	663.385	642.366	653.713	687.398	681.095	681.046
ENSG00000144381.18	HSPD1	657.45	669.629	667.783	548.667	536.444	543.087	538.054	541.377	535.438
ENSG00000165521.15	EML5	571.365	581.432	610.289	667.309	682.175	701.185	696.883	685.828	697.291
ENSG00000138326.21	RPS24	568.293	586.77	607.207	670.735	621.973	662.429	690.272	671.459	642.859
ENSG00000127616.19	SMARCA4	641.321	637.428	617.294	588.399	584.551	576.458	613.416	572.524	557.418
ENSG00000054654.19	SYNE2	615.464	606.988	438.427	625.975	713.306	753.186	658.886	692.886	707.948
ENSG00000154380.17	ENAH	605.479	601.479	614.212	638.463	656.467	639.484	627.672	636.213	639.64
ENSG00000124766.7	SOX4	558.18	583.704	548.818	698.862	674.69	635.51	686.248	701.381	669.649
ENSG00000135387.21	CAPRIN1	608.423	613.292	595.272	629.788	599.086	597.182	598.067	607.812	603.228
ENSG00000132780.17	NASP	591.974	594.608	608.104	611.221	605.54	619.914	660.15	626.408	639.085
ENSG00000133026.13	MYH10	630.569	608.976	608.72	611.829	610.421	605.856	614.048	610.644	600.12
ENSG00000138668.19	HNRNPD	629.161	607.045	614.828	609.839	594.422	596.627	637.272	587.653	575.18
ENSG00000176887.7	SOX11	554.724	555.989	559.633	652.499	670.894	633.502	742.985	692.548	665.579
ENSG00000177600.9	RPLP2	584.742	594.324	575.099	608.458	586.341	580.603	587.835	623.196	602.784
ENSG00000166508.18	MCM7	614.248	583.988	584.513	581.768	569.365	558.341	585.536	591.203	592.941
ENSG00000139116.19	KIF21A	606.887	607.499	595.16	566.295	592.144	600.344	566.221	589.851	589.463
ENSG00000153944.12	MSI2	549.539	542.019	564.34	653.162	660.806	659.139	688.95	666.726	660.103
ENSG00000115524.17	SF3B1	556.196	558.829	574.258	611.552	621.377	609.958	600.022	611.87	615.254
ENSG00000197756.10	RPL37A	545.315	557.579	525.171	634.706	575.494	570.049	588.237	626.788	603.043
ENSG00000100320.23	RBFOX2	547.875	554.172	570.56	624.538	623.112	620.939	603.183	621.801	609.852
ENSG00000115677.17	HDLBP	578.981	579.785	571.064	588.343	575.982	560.05	555.874	574.933	572.368
ENSG00000035862.12	TIMP2	646.058	613.122	584.401	518.828	519.468	485.189	478.097	501.228	503.171
ENSG00000149294.17	NCAM1	585.382	558.375	572.577	581.657	578.693	548.727	558.92	561.493	578.14
ENSG00000248527.1	MTATP6P1	525.41	524.129	595.776	603.098	624.414	638.287	751.838	636.593	625.652
ENSG00000077097.15	TOP2B	559.076	551.219	561.09	615.144	628.21	646.62	574.441	649.567	631.499
ENSG00000134138.20	MEIS2	466.782	481.536	512.058	705.216	684.019	698.279	690.1	717.905	702.36
ENSG00000075461.6	CACNG4	554.276	562.918	536.546	598.566	599.954	605.472	590.479	644.834	587.761
ENSG00000107485.18	GATA3	530.85	521.971	531.839	638.132	632.766	614.231	660.61	633.677	625.43
ENSG00000204469.13	PRRC2A	559.716	560.135	554.87	565.466	572.836	558.47	572.947	546.49	536.918
ENSG00000109685.19	NSD2	555.236	554.853	552.012	581.657	584.551	576.928	596.975	561.493	564.708
ENSG00000082898.19	XPO1	558.5	570.812	580.03	565.356	567.195	565.392	544.434	536.347	541.84
ENSG00000092964.18	DPYSL2	576.293	570.414	552.74	584.531	568.009	541.592	532.133	566.987	557.529
ENSG00000127603.30	MACF1	562.852	545.199	505.558	614.426	612.862	609.574	607.265	575.44	572.738
ENSG00000111371.16	SLC38A1	568.933	558.261	551.732	542.755	559.548	559.41	531.098	574.383	560.268
ENSG00000100077.15	GRK3	577.253	579.899	559.297	534.576	544.362	502.067	583.294	521.429	533.107
ENSG00000181163.14	NPM1	537.827	543.666	536.098	583.481	561.88	568.596	602.609	594.584	587.28
ENSG00000105887.11	MTPN	549.539	544.972	527.02	567.069	542.735	516.638	515.865	538.503	567.853
ENSG00000168243.11	GNG4	588.326	590.235	582.832	503.355	490.832	469.678	486.145	478.744	469.128
ENSG00000066279.19	ASPM	487.775	516.349	483.031	599.782	704.628	766.945	623.705	713.51	709.687
ENSG00000197958.13	RPL12	504.032	527.139	519.007	594.367	565.135	575.262	605.138	611.067	590.166
ENSG00000128564.7	VGF	700.013	678.659	576.219	342.938	355.894	317.905	337.606	333.574	332.068
ENSG00000175130.7	MARCKSL1	574.181	570.528	526.459	524.74	522.451	494.29	517.819	522.866	531.035
ENSG00000113810.16	SMC4	544.867	547.187	563.667	531.206	581.351	599.532	551.965	583.765	598.714
ENSG00000009954.11	BAZ1B	562.404	574.901	564.956	511.975	513.014	511.852	525.522	496.537	488.481
ENSG00000134333.14	LDHA	525.73	524.016	510.993	595.196	585.473	581.415	582.719	597.078	575.957
ENSG00000182670.13	TTC3	543.843	543.325	549.266	546.015	556.348	574.108	525.695	581.948	569.925
ENSG00000122565.19	CBX3	535.971	522.085	532.511	541.318	550.003	529.926	526.269	561.409	570.221
ENSG00000085224.23	ATRX	541.795	555.819	541.253	477.549	526.573	615.299	561.392	594.5	575.217
ENSG00000148730.7	EIF4EBP2	555.428	549.118	538.675	511.975	510.736	491.171	497.01	499.664	501.321
ENSG00000100604.13	CHGA	539.875	564.338	553.357	538.168	524.512	586.286	505.288	587.569	515.049
ENSG00000130294.18	KIF1A	567.141	577.627	551.452	463.679	469.192	469.422	463.496	465.601	437.934
ENSG00000159140.21	SON	521.25	516.974	527.132	550.491	531.725	531.593	523.338	525.148	524.411
ENSG00000254726.3	MEX3A	516.449	518.393	507.127	580.497	571.643	567.144	563.922	572.904	567.483
ENSG00000083845.9	RPS5	524.258	522.709	484.32	536.455	535.468	501.725	527.649	561.747	534.624
ENSG00000008988.11	RPS20	501.6	505.502	469.583	580.276	529.339	520.441	496.607	564.367	545.984
ENSG00000135111.16	TBX3	625.64	596.084	546.744	400.849	429.383	366.359	401.471	363.115	396.121
ENSG00000047410.14	TPR	524.514	550.083	546.744	482.08	539.698	602.951	529.029	597.289	584.024
ENSG00000105372.8	RPS19	501.088	500.447	459.552	547.728	512.743	503.221	492.871	555.999	545.91
ENSG00000196262.15	PPIA	521.442	513.112	545.848	508.991	500.648	489.462	538.858	502.115	501.876
ENSG00000107581.13	EIF3A	508.193	516.576	522.201	529.382	535.847	547.83	529.086	547.378	542.21
ENSG00000008277.14	ADAM22	545.251	526.685	537.162	479.096	479.334	467.756	479.592	464.882	474.938
ENSG00000174748.22	RPL15	473.759	482.785	466.165	568.229	557.27	535.225	560.53	576.834	557.677
ENSG00000177954.14	RPS27	489.952	496.642	482.807	543.805	522.831	521.594	540.123	556.464	519.416
ENSG00000132688.11	NES	561.124	535.885	543.494	456.606	438.766	443.742	450.62	442.61	433.716
ENSG00000165732.13	DDX21	534.818	526.798	519.287	495.287	473.856	493.094	476.775	484.661	499.101
ENSG00000092201.10	SUPT16H	512.225	509.591	497.265	506.781	496.418	489.804	508.737	497.17	510.609
ENSG00000125944.21	HNRNPR	519.329	490.565	508.808	504.35	498.099	500.315	540.353	499.918	517.085
ENSG00000099194.6	SCD	477.087	469.041	506.23	527.227	525.217	528.816	489.594	534.361	514.716
ENSG00000147862.17	NFIB	456.797	462.51	478.717	594.588	599.249	578.595	534.662	602.995	592.127
ENSG00000105968.19	H2AZ2	487.455	486.363	474.738	502.084	519.631	501.896	536.502	495.269	522.45
ENSG00000108848.16	LUC7L3	457.95	467.849	514.804	492.524	508.35	558.47	532.018	568.678	568.445
ENSG00000221866.9	PLXNA4	577.637	557.523	546.352	412.896	416.855	381.571	416.704	385.218	410.922
ENSG00000120137.7	PANK3	475.295	465.975	467.621	536.787	542.627	556.718	498.619	557.901	553.089
ENSG00000106261.17	ZKSCAN1	479.007	471.313	478.1	550.159	550.003	548.215	503.908	527.937	522.82
ENSG00000118816.11	CCNI	468.574	451.322	451.371	551.32	539.156	530.097	521.096	554.943	534.735
ENSG00000152795.18	HNRNPDL	428.38	425.596	466.165	551.817	551.738	556.29	597.895	583.385	585.319
ENSG00000143321.19	HDGF	502.624	487.612	484.993	490.977	477.653	459.637	492.009	475.955	481.561
ENSG00000132475.10	H3-3B	437.084	442.69	445.207	572.595	562.423	555.393	540.181	583.554	572.738
ENSG00000157851.17	DPYSL5	506.849	508.909	491.045	480.091	475.266	460.363	445.619	472.532	470.312
ENSG00000142864.15	SERBP1	493.792	482.103	499.282	489.595	487.578	480.019	486.203	488.295	491.552
ENSG00000128050.9	PAICS	496.096	494.087	494.239	473.847	447.986	447.545	505.632	457.402	458.767
ENSG00000160710.18	ADAR	494.176	482.444	478.324	489.43	486.168	475.66	498.907	499.241	495.142
ENSG00000156482.11	RPL30	472.926	472.165	465.716	521.812	484.92	488.009	517.589	516.653	501.025
ENSG00000133706.19	LARS1	489.184	476.652	500.291	483.075	494.791	498.777	499.252	473.208	482.19
ENSG00000138095.19	LRPPRC	485.535	470.348	468.126	519.601	513.665	488.949	468.785	518.64	510.276
ENSG00000198668.13	CALM1	505.441	507.319	496.088	442.183	442.616	432.077	428.029	452.5	451.182
ENSG00000141522.12	ARHGDIA	532.322	518.166	495.247	424.39	427.376	394.347	429.293	413.914	411.403
ENSG00000164924.18	YWHAZ	476.639	482.274	481.799	477.383	466.805	463.953	506.092	465.77	463.578
ENSG00000091136.15	LAMB1	448.285	459.898	467.117	520.541	532.919	523.133	541.733	530.008	530.961
ENSG00000253352.10	TUG1	467.422	468.417	462.802	503.576	501.245	504.674	493.043	504.186	508.389
ENSG00000175216.15	CKAP5	454.941	458.365	466.669	537.118	554.233	541.335	521.613	528.613	536.326
ENSG00000120802.14	TMPO	491.808	475.97	480.061	484.346	497.123	476.088	499.884	467.164	488.259
ENSG00000185559.16	DLK1	523.618	532.194	484.544	453.235	425.478	437.931	361.692	488	403.632
ENSG00000105193.9	RPS16	460.51	463.249	452.66	503.079	481.178	472.157	491.031	508.708	504.355
ENSG00000254656.3	RTL1	381.721	387.943	383.567	694.828	661.131	735.582	627.729	734.303	618.03
ENSG00000150753.12	CCT5	493.216	481.138	479.109	467.271	455.85	450.664	474.246	450.302	445.668
ENSG00000205339.10	IPO7	477.599	465.634	473.561	491.364	474.941	481.472	469.762	474.011	492.107
ENSG00000149136.9	SSRP1	474.335	479.15	470.591	473.847	464.365	451.818	471.832	455.373	463.615
ENSG00000127481.15	UBR4	478.431	480.627	461.289	476.665	476.188	488.949	481.087	462.727	463.06
ENSG00000173473.11	SMARCC1	474.847	481.763	475.971	476.389	476.188	463.995	470.854	472.236	470.534
ENSG00000011304.22	PTBP1	482.463	483.978	455.181	450.914	447.715	431.692	439.985	452.077	455.511
ENSG00000196924.19	FLNA	513.377	500.788	468.63	420.964	410.834	413.404	412.105	400.771	399.044
ENSG00000117114.20	ADGRL2	448.861	442.52	439.772	490.645	500.431	506.255	520.463	523.373	525.003
ENSG00000128641.19	MYO1B	455.965	454.503	452.268	484.125	504.445	491.94	494.136	498.312	512.829
ENSG00000146731.11	CCT6A	487.583	486.988	488.411	425.163	417.885	413.191	419.233	422.198	418.212
ENSG00000065150.21	IPO5	478.751	466.202	458.712	453.953	453.572	436.435	436.364	446.498	459.803
ENSG00000108175.18	ZMIZ1	468.446	462.17	454.789	484.843	487.306	492.197	508.794	485.633	478.971
ENSG00000145741.16	BTF3	430.236	443.485	450.867	500.481	475.158	485.915	504.598	504.313	491.182
ENSG00000107731.12	UNC5B	546.275	548.89	474.626	381.288	365.114	347.26	368.072	341.012	361.19
ENSG00000170759.11	KIF5B	484.127	470.007	470.031	459.535	479.93	474.592	440.445	477.519	478.379
ENSG00000167005.14	NUDT21	463.326	462.794	465.044	455.39	437.898	443.144	437.686	452.711	445.298
ENSG00000145495.16	MARCHF6	425.307	429.969	437.418	510.483	504.933	497.111	484.248	503.087	511.793
ENSG00000174437.17	ATP2A2	512.033	498.289	475.523	390.24	389.574	379.435	377.902	389.022	391.347
ENSG00000151914.21	DST	447.005	439.112	365.86	457.158	512.309	577.655	499.827	558.112	552.608
ENSG00000136295.15	TTYH3	461.342	451.266	439.996	469.813	465.233	454.595	445.216	459.853	454.845
ENSG00000162849.16	KIF26B	442.717	427.356	430.638	509.212	510.899	492.581	475.453	502.791	486.224
ENSG00000164754.15	RAD21	438.556	428.095	429.853	514.628	494.411	483.394	473.384	500.89	503.541
ENSG00000196367.14	TRRAP	463.966	456.434	450.53	449.035	459.592	433.786	450.85	432.974	428.536
ENSG00000135316.19	SYNCRIP	448.157	445.019	442.069	458.706	471.524	462.927	474.993	481.238	460.877
ENSG00000170091.11	NSG2	490.976	477.674	466.501	388.25	388.164	353.626	392.618	367.172	393.419
ENSG00000144713.13	RPL32	430.876	431.673	400.434	482.357	450.535	436.734	451.827	483.562	471.015
ENSG00000108468.15	CBX1	439.644	432.808	446.496	457.324	448.148	439.896	461.255	435.933	454.993
ENSG00000143924.19	EML4	456.221	453.197	467.902	433.397	431.227	438.315	449.24	424.142	436.417
ENSG00000167460.17	TPM4	486.111	486.874	473.281	406.652	398.631	389.818	418.486	392.318	387.647
ENSG00000164587.13	RPS14	423.387	421.45	399.369	492.856	444.84	449.083	445.159	488.507	478.786
ENSG00000172809.13	RPL38	427.868	437.749	416.292	465.116	423.959	436.478	456.656	461.839	443.744
ENSG00000179195.16	ZNF664	452.701	451.834	453.893	422.842	418.265	413.062	416.762	421.86	420.284
ENSG00000143947.15	RPS27A	412.251	422.756	417.917	459.479	437.356	445.066	427.224	481.195	468.203
ENSG00000162613.17	FUBP1	431.644	445.53	438.763	429.474	452.65	444.383	461.542	443.625	455.067
ENSG00000092199.18	HNRNPC	427.932	438.885	436.746	445.388	436.759	429.684	461.312	430.523	430.645
ENSG00000177733.7	HNRNPA0	432.028	425.369	410.184	454.948	452.541	437.418	443.204	465.136	456.473
ENSG00000083312.18	TNPO1	416.347	420.541	412.762	465.779	470.71	470.148	454.586	486.309	480.784
ENSG00000121774.18	KHDRBS1	416.731	410.546	405.477	479.704	480.69	465.192	456.598	485.633	483.819
ENSG00000147403.18	RPL10	417.947	418.383	382.559	461.8	447.606	415.156	380.317	493.24	477.75
ENSG00000072832.15	CRMP1	425.115	421.507	413.098	470.807	449.721	440.067	459.415	469.235	456.214
ENSG00000162521.19	RBBP4	437.66	441.214	435.905	423.671	415.01	413.532	415.095	413.703	416.621
ENSG00000063046.18	EIF4B	382.681	396.121	387.49	529.824	503.903	514.629	531.558	528.444	512.866
ENSG00000071082.11	RPL31	407.322	404.64	391.132	488.269	432.095	437.033	415.957	473.377	464.022
ENSG00000168028.14	RPSA	413.147	406.911	395.111	476.444	441.152	431.778	404.575	470.926	476.196
ENSG00000118181.11	RPS25	389.273	407.423	404.357	490.866	460.08	460.363	467.578	487.492	471.312
ENSG00000188846.14	RPL14	428.444	428.038	428.62	434.281	433.125	438.144	464.761	442.314	430.941
ENSG00000110700.7	RPS13	399.834	407.934	395.335	469.481	449.016	436.435	418.314	478.913	467.907
ENSG00000161547.17	SRSF2	434.972	426.05	446.328	389.19	406.929	397.167	421.245	420.549	432.68
ENSG00000170017.12	ALCAM	453.149	463.419	445.431	398.584	420.109	428.958	394.17	420.549	412.143
ENSG00000110955.9	ATP5F1B	434.268	427.186	410.913	434.281	417.777	399.004	403.713	433.524	435.64
ENSG00000179218.15	CALR	566.885	533.216	503.036	236.619	237.389	232.703	233.214	236.372	229.643
ENSG00000142192.21	APP	403.994	401.459	397.128	481.086	458.29	457.757	469.13	474.687	465.058
ENSG00000168385.18	SEPTIN2	431.452	423.551	428.004	419.637	417.071	415.626	419.521	424.226	429.794
ENSG00000143870.13	PDIA6	504.929	483.978	479.389	315.695	308.004	298.762	298.459	311.851	302.798
ENSG00000168280.18	KIF5C	439.772	434.342	438.651	421.461	423.092	429.769	430.845	425.156	419.174
ENSG00000115760.14	BIRC6	430.94	424.63	360.817	453.069	455.904	448.57	438.721	440.835	440.636
ENSG00000143569.19	UBAP2L	454.045	442.463	457.703	385.045	389.628	385.417	401.701	380.823	385.205
ENSG00000143549.21	TPM3	456.221	443.883	448.513	379.409	371.242	372.128	406.07	372.709	377.656
ENSG00000130726.12	TRIM28	447.389	440.475	415.396	390.516	389.574	362.386	363.991	383.443	384.28
ENSG00000168906.13	MAT2A	408.474	420.371	446.944	411.349	403.567	425.582	434.007	442.145	446.445
ENSG00000155506.18	LARP1	432.412	437.068	421.952	421.019	395.648	385.716	405.897	396.883	392.383
ENSG00000143401.15	ANP32E	418.267	415.544	427.556	424.666	431.769	425.924	436.996	415.943	433.531
ENSG00000105323.17	HNRNPUL1	418.267	411.057	414.051	434.06	428.135	412.122	451.137	438.088	421.764
ENSG00000152234.16	ATP5F1A	426.908	415.317	399.986	423.064	416.692	401.825	377.557	433.313	425.982
ENSG00000130816.17	DNMT1	454.685	432.013	434.84	368.302	365.385	364.308	384.34	358.044	367.665
ENSG00000260032.2	NORAD	408.602	417.134	430.862	407.646	401.669	400.585	396.067	402.842	398.008
ENSG00000006125.18	AP2B1	425.883	422.983	406.318	409.193	400.638	388.408	378.822	400.306	390.015
ENSG00000063177.13	RPL18	397.658	414.408	379.309	436.049	412.57	404.901	406.185	439.652	421.801
ENSG00000163468.15	CCT3	436.892	440.873	432.711	380.901	367.554	360.805	357.61	360.96	371.402
ENSG00000171634.18	BPTF	395.866	396.121	402.227	440.028	470.005	504.161	467.348	459.261	455.4
ENSG00000099783.12	HNRNPM	440.22	438.204	423.689	376.425	377.317	380.759	388.824	382.387	372.55
ENSG00000038382.20	TRIO	412.699	406.06	399.874	427.926	429.546	421.523	435.789	415.689	426.13
ENSG00000189403.15	HMGB1	414.555	412.363	415.452	398.473	392.448	387.809	388.192	400.982	401.116
ENSG00000167996.16	FTH1	396.57	403.674	390.796	416.598	422.332	403.747	417.624	417.168	406.445
ENSG00000086061.16	DNAJA1	494.432	479.775	475.242	289.613	277.306	277.44	270.349	266.969	268.163
ENSG00000112081.17	SRSF3	418.139	406.571	410.24	382.006	391.201	370.12	385.203	399.292	391.939
ENSG00000008294.21	SPAG9	375.832	374.654	382.615	470.642	459.104	470.789	439.353	459.895	456.325
ENSG00000120694.20	HSPH1	489.952	483.126	483.76	276.627	277.795	279.192	260.174	271.66	275.527
ENSG00000078018.20	MAP2	363.287	379.084	377.123	457.103	473.585	482.625	424.867	471.813	460.803
ENSG00000167291.16	TBC1D16	433.5	419.69	398.137	382.89	379.432	365.078	364.681	379.64	369.145
ENSG00000104738.18	MCM4	440.732	428.265	439.884	316.8	321.888	305.727	333.582	325.291	322.706
ENSG00000004487.17	KDM1A	380.056	381.98	385.304	437.32	430.685	426.437	428.029	433.27	430.904
ENSG00000117713.20	ARID1A	395.738	387.432	393.205	418.256	413.004	413.276	435.099	403.18	407.518
ENSG00000108107.15	RPL28	405.274	386.353	369.614	412.233	414.739	386.57	434.984	418.521	405.372
ENSG00000166913.13	YWHAB	435.484	420.144	408.784	362.389	354.809	337.133	336.111	342.027	347.424
ENSG00000100201.23	DDX17	382.681	390.101	395.615	397.368	392.991	389.647	413.772	394.009	396.787
ENSG00000131473.17	ACLY	397.658	388.852	387.826	399.578	384.856	380.674	380.144	382.26	391.458
ENSG00000163682.17	RPL9	373.528	370.395	364.627	442.515	406.279	382.938	386.352	441.131	419.655
ENSG00000167986.15	DDB1	392.473	383.627	380.149	407.646	389.682	395.073	384.34	404.279	404.965
ENSG00000071054.16	MAP4K4	370.776	376.982	379.028	435.607	422.82	423.659	436.709	420.718	422.023
ENSG00000127483.19	HP1BP3	364.311	373.007	382.783	439.254	430.522	442.033	418.371	432.467	442.153
ENSG00000182168.15	UNC5C	336.662	336.944	352.916	493.022	480.473	489.547	421.993	479.801	455.289
ENSG00000116062.17	MSH6	397.722	407.479	403.236	362.113	354.646	354.737	380.661	362.481	368.627
ENSG00000117020.19	AKT3	379.544	384.422	367.317	410.022	409.804	409.9	411.588	416.83	412.994
ENSG00000110367.13	DDX6	393.881	383.684	364.179	394.605	386.266	372.854	421.993	392.487	381.43
ENSG00000164880.16	INTS1	382.681	376.926	365.243	395.047	401.94	387.339	383.651	392.276	391.68
ENSG00000155561.15	NUP205	377.624	383.684	372.248	399.799	382.306	379.947	376.81	388.515	386.426
ENSG00000055917.16	PUM2	392.345	385.842	386.257	391.676	392.503	380.545	368.245	391.727	383.096
ENSG00000113648.16	MACROH2A1	394.585	396.632	388.891	371.12	367.175	352.985	365.543	359.777	373.327
ENSG00000130255.13	RPL36	366.04	380.844	360.032	406.431	382.306	375.29	400.551	405.715	392.753
ENSG00000044574.9	HSPA5	571.493	557.068	500.291	137.816	136.782	130.153	129.397	134.774	128.55
ENSG00000115241.11	PPM1G	396.762	382.832	398.361	378.304	372.002	363.838	380.202	363.665	362.522
ENSG00000196531.14	NACA	375.896	374.711	393.262	389.687	371.405	394.86	379.454	401.616	408.48
ENSG00000197081.16	IGF2R	361.303	352.051	418.422	431.573	442.671	393.621	444.814	396.08	376.546
ENSG00000184640.20	SEPTIN9	376.28	377.948	374.097	399.357	381.33	376.102	392.331	392.107	378.063
ENSG00000153827.14	TRIP12	375.704	371.417	373.705	402.397	385.886	389.476	377.557	389.994	383.947
ENSG00000086232.13	EIF2AK1	376.536	360.456	371.912	399.965	398.74	388.237	407.737	395.53	396.232
ENSG00000198755.11	RPL10A	363.159	363.012	361.377	399.523	382.361	374.051	390.951	406.899	395.677
ENSG00000125107.19	CNOT1	382.617	377.209	363.73	387.421	393.913	382.297	376.753	380.485	376.583
ENSG00000117707.16	PROX1	301.331	305.766	323.777	493.464	513.394	535.567	489.307	520.415	499.693
ENSG00000112118.20	MCM3	396.506	394.02	389.003	330.118	330.24	321.921	333.064	329.094	337.803
ENSG00000108518.8	PFN1	404.314	397.2	392.421	342.717	337.888	328.373	353.529	342.28	343.317
ENSG00000126777.18	KTN1	392.793	396.803	401.331	340.893	374.659	415.327	368.245	402.884	397.083
ENSG00000181222.19	POLR2A	382.169	372.496	380.149	368.578	369.995	370.59	386.64	366.665	359.635
ENSG00000054523.18	KIF1B	369.752	364.999	361.321	406.928	407.743	401.825	403.425	384.753	384.169
ENSG00000197451.12	HNRNPAB	397.082	398.279	378.86	352.663	348.518	337.261	363.531	350.986	336.323
ENSG00000138443.17	ABI2	369.432	363.125	368.55	388.582	400.963	393.535	392.906	383.232	380.394
ENSG00000106415.13	GLCCI1	295.059	301.734	330.893	483.959	467.782	495.273	468.44	502.622	492.514
ENSG00000080854.16	IGSF9B	399.002	395.894	409.904	363.826	364.354	368.453	340.365	342.661	350.459
ENSG00000227051.7	C14orf132	372.696	371.587	360.2	383.277	377.1	371.957	363.416	378.964	376.361
ENSG00000154277.13	UCHL1	367	363.92	362.105	355.813	350.091	340.295	347.55	357.959	375.288
ENSG00000164985.15	PSIP1	363.543	348.189	370.287	396.042	392.991	405.243	389.169	409.181	411.218
ENSG00000147604.14	RPL7	365.208	366.419	363.338	387.532	372.761	385.374	384.34	399.503	391.384
ENSG00000189091.13	SF3B3	392.153	387.318	374.994	346.64	337.399	333.501	338.64	338.308	344.538
ENSG00000136942.15	RPL35	360.407	371.928	350.002	377.198	352.748	358.54	391.009	385.599	365.408
ENSG00000120693.14	SMAD9	432.604	429.287	403.068	288.287	292.004	271.33	280.926	257.333	284.334
ENSG00000166197.17	NOLC1	397.338	392.827	390.011	338.296	325.576	330.339	335.594	329.728	328.738
ENSG00000087365.16	SF3B2	368.92	372.723	366.981	379.409	367.5	361.317	373.418	361.34	364.89
ENSG00000116016.14	EPAS1	313.684	338.421	330.109	444.78	444.786	444.938	452.517	473.673	447.407
ENSG00000130508.11	PXDN	357.335	354.72	364.795	389.908	391.364	397.381	386.352	392.192	401.782
ENSG00000133030.22	MPRIP	381.849	370.622	368.718	372.501	365.548	364.308	354.621	351.366	346.573
ENSG00000168066.21	SF1	353.687	347.564	348.769	393.279	392.774	387.297	405.667	402.419	397.823
ENSG00000088247.18	KHSRP	379.096	373.632	365.58	363.936	361.914	345.251	368.36	364.975	353.419
ENSG00000179051.14	RCC2	389.849	391.067	368.998	350.453	345.752	324.955	350.367	346.549	347.239
ENSG00000115464.15	USP34	354.263	355.572	343.389	384.935	405.574	409.174	376.235	385.81	392.716
ENSG00000182944.18	EWSR1	360.919	366.703	380.709	360.179	356.002	366.189	365.543	363.115	367.924
ENSG00000029363.17	BCLAF1	364.824	364.715	376.955	347.524	361.751	388.066	361.117	386.021	386.87
ENSG00000198700.10	IPO9	365.784	370.395	367.205	374.988	365.114	354.609	362.439	360.453	360.709
ENSG00000060237.19	WNK1	365.464	372.496	368.718	379.796	384.096	377.683	380.087	363.496	358.155
ENSG00000064042.18	LIMCH1	401.306	391.578	384.072	331.941	328.234	321.28	347.148	320.262	338.544
ENSG00000131469.15	RPL27	362.071	373.575	337.169	386.206	349.657	347.26	350.367	378.33	374.955
ENSG00000196591.12	HDAC2	363.351	360.513	367.877	380.182	368.531	356.233	359.22	365.102	363.114
ENSG00000103495.14	MAZ	377.56	369.202	346.135	341.28	343.094	324.314	343.009	352.888	351.384
ENSG00000213190.4	MLLT11	364.311	355.685	360.929	363.384	352.857	340.765	346.458	356.438	364.187
ENSG00000109132.7	PHOX2B	333.654	330.186	329.212	414.001	418.861	408.789	399.746	425.663	406.963
ENSG00000143621.17	ILF2	360.599	357.162	354.485	367.307	347.108	345.849	364.221	353.86	362.263
ENSG00000124795.17	DEK	377.432	363.58	377.74	342.385	346.999	355.805	329.558	364.341	374.474
ENSG00000185686.18	PRAME	341.59	346.372	356.782	367.639	367.663	370.376	373.648	379.428	383.614
ENSG00000168036.18	CTNNB1	353.943	355.742	356.054	362.444	350.091	340.295	332.375	349.422	348.386
ENSG00000064393.16	HIPK2	375.768	370.678	367.205	363.549	365.873	355.848	374.511	337.969	333.104
ENSG00000272398.6	CD24	334.998	332.571	349.834	391.179	379.866	357.942	361.692	388.811	383.799
ENSG00000077147.16	TM9SF3	372.824	354.266	359.136	347.359	346.565	350.208	340.307	348.197	348.978
ENSG00000110492.16	MDK	358.807	359.491	345.799	338.075	346.348	331.492	348.528	357.156	349.978
ENSG00000166025.18	AMOTL1	372.76	366.873	353.924	342.938	333.223	322.263	329.73	332.94	326.813
ENSG00000105640.13	RPL18A	345.686	346.201	309.039	368.025	346.674	341.619	353.471	380.654	367.036
ENSG00000145425.10	RPS3A	330.517	327.914	339.411	378.248	367.663	365.633	379.627	375.202	366.851
ENSG00000132507.18	EIF5A	383.833	367.839	352.859	322.216	305.672	287.396	302.023	304.329	304.315
ENSG00000125170.11	DOK4	419.291	405.946	372.864	259.22	251.87	237.189	254.483	239.245	264.389
ENSG00000136628.18	EPRS1	352.023	359.377	346.079	332.715	334.688	322.989	291.963	330.109	327.332
ENSG00000160551.12	TAOK1	343.574	335.241	303.604	379.685	378.185	392.168	369.682	375.16	370.477
ENSG00000166226.13	CCT2	360.087	348.303	344.006	342.551	323.515	327.519	324.154	335.56	329.441
ENSG00000132718.9	SYT11	298.643	301.279	306.349	411.57	391.364	405.2	420.901	422.367	405.964
ENSG00000034510.6	TMSB10	346.902	343.362	328.876	361.505	341.738	333.629	352.897	353.057	343.169
ENSG00000149256.16	TENM4	364.503	373.632	349.777	334.152	330.837	314.7	333.869	310.076	315.231
ENSG00000089597.18	GANAB	347.35	336.887	323.889	357.803	361.697	347.217	330.65	362.524	364.15
ENSG00000182481.10	KPNA2	341.334	332.798	321.479	380.625	374.442	357.13	362.784	358.72	372.291
ENSG00000067560.14	RHOA	349.014	347.224	340.419	333.931	332.084	313.803	329.788	322.966	328.368
ENSG00000186468.13	RPS23	331.605	321.327	309.095	384.272	345.697	351.233	337.146	364.679	362.966
ENSG00000112936.19	C7	308.756	295.998	306.854	435.386	417.288	412.635	398.482	424.099	411.218
ENSG00000132341.12	RAN	346.518	340.125	331.846	338.959	331.705	330.125	325.189	340.886	336.841
ENSG00000138071.14	ACTR2	359.447	346.372	357.174	322.105	329.861	324.955	312.715	316.374	320.634
ENSG00000096746.18	HNRNPH3	347.158	344.895	348.769	345.867	331.162	352.045	351.172	337.589	342.614
ENSG00000060982.15	BCAT1	353.367	364.204	343.501	327.797	331.271	317.905	302.31	335.053	328.368
ENSG00000171858.18	RPS21	332.949	329.732	303.043	359.295	331.271	316.537	296.217	365.82	349.719
ENSG00000179222.18	MAGED1	345.878	343.135	315.147	346.861	340.545	342.858	322.89	352	336.36
ENSG00000114857.18	NKTR	336.15	345.804	344.286	321.553	342.552	379.563	332.087	351.958	363.521
ENSG00000138758.12	SEPTIN11	368.984	355.799	362.161	313.927	303.394	306.325	301.046	297.06	300.726
ENSG00000172534.14	HCFC1	341.206	336.547	328.372	326.415	333.223	321.451	354.621	327.784	323.557
ENSG00000110958.16	PTGES3	357.719	358.752	352.972	302.93	292.438	287.054	284.778	291.312	293.955
ENSG00000128989.11	ARPP19	325.397	318.43	324.337	349.569	346.565	322.178	360.887	345.408	346.092
ENSG00000132424.17	PNISR	306.836	320.929	354.204	334.373	364.626	399.346	374.396	397.179	399.081
ENSG00000120438.12	TCP1	370.2	364.545	356.166	299.559	287.123	284.405	284.318	295.073	292.548
ENSG00000162733.19	DDR2	316.756	315.193	310.44	382.78	373.249	387.724	342.549	375.878	375.029
ENSG00000151835.16	SACS	363.735	345.406	300.466	314.369	355.351	358.326	289.894	342.449	338.581
ENSG00000127914.19	AKAP9	310.804	337.967	315.483	285.745	350.85	444.511	374.051	419.958	391.088
ENSG00000122691.13	TWIST1	295.123	295.6	302.819	396.208	407.092	399.859	396.297	412.477	383.762
ENSG00000138757.15	G3BP2	348.438	347.167	336.273	319.95	305.129	301.069	320.015	322.121	316.157
ENSG00000055609.20	KMT2C	336.854	334.616	307.246	351.337	353.779	358.625	348.183	347.098	348.867
ENSG00000176619.13	LMNB2	363.095	348.246	338.458	307.848	305.563	297.053	313.577	301.793	299.283
ENSG00000149639.15	SOGA1	328.597	324.109	320.751	355.924	351.338	341.192	363.359	332.433	343.502
ENSG00000257923.12	CUX1	343.19	350.234	326.354	337.578	332.952	314.785	335.996	316.754	316.342
ENSG00000089154.11	GCN1	324.757	324.223	328.652	332.77	325.901	319.4	311.968	329.052	325.962
ENSG00000185624.16	P4HB	365.72	352.903	346.191	280.385	270.961	258.554	263.278	275.422	275.12
ENSG00000080345.18	RIF1	341.718	345.009	319.574	293.923	338.81	347.986	312.313	335.772	339.469
ENSG00000136527.18	TRA2B	344.47	340.92	341.708	303.262	302.906	298.206	307.196	293.806	298.21
ENSG00000119285.11	HEATR1	334.422	331.776	316.324	331.444	327.095	322.861	308.749	334.25	330.588
ENSG00000175061.18	SNHG29	315.54	313.376	301.474	340.949	337.508	337.603	345.251	360.622	356.527
ENSG00000113013.16	HSPA9	344.022	339.841	344.062	289.447	298.079	292.353	295.067	301.286	296.878
ENSG00000146247.14	PHIP	332.309	327.176	314.755	327.742	368.91	386.485	312.887	358.72	346.758
ENSG00000188529.15	SRSF10	327.893	323.769	342.269	320.834	312.776	321.451	310.933	320.135	326.665
ENSG00000122545.20	SEPTIN7	331.861	318.601	339.187	324.647	338.864	338.115	323.407	333.997	334.325
ENSG00000136238.18	RAC1	330.773	337.569	331.286	320.945	312.017	304.659	310.013	321.191	316.823
ENSG00000153147.6	SMARCA5	324.949	316.272	327.867	337.854	344.721	345.379	344.964	340.97	340.505
ENSG00000136193.17	SCRN1	327.765	319.112	306.293	350.84	335.067	336.791	340.02	347.647	340.801
ENSG00000090060.18	PAPOLA	331.029	322.406	329.829	330.67	323.461	324.271	333.237	322.037	326.184
ENSG00000196361.10	ELAVL3	333.59	341.374	325.738	333.433	343.257	330.424	317.544	329.644	309.866
ENSG00000197121.15	PGAP1	303.444	301.961	306.237	366.976	392.774	382.981	338.928	366.581	371.217
ENSG00000112038.18	OPRM1	349.847	348.075	314.699	305.196	333.711	332.817	323.407	264.264	308.719
ENSG00000198695.2	MT-ND6	352.663	327.29	398.865	334.317	275.462	329.313	318.923	355.001	338.173
ENSG00000118058.23	KMT2A	312.788	316.159	305.677	362.223	366.849	370.974	349.735	335.856	337.581
ENSG00000164091.12	WDR82	331.221	326.495	320.471	321.718	317.549	307.051	300.471	313.627	310.717
ENSG00000221983.8	UBA52	316.244	312.07	294.302	348.464	320.153	298.164	314.325	339.026	335.99
ENSG00000111669.15	TPI1	317.396	324.109	303.716	322.326	319.393	317.135	311.105	329.602	332.031
ENSG00000196914.9	ARHGEF12	311.764	303.494	301.306	355.371	345.535	346.448	342.664	345.957	347.831
ENSG00000204463.13	BAG6	314.516	308.719	308.871	332.881	328.722	331.877	335.766	337.166	333.548
ENSG00000112306.8	RPS12	297.811	299.632	293.013	337.246	323.352	315.982	305.932	346.549	335.398
ENSG00000143702.16	CEP170	316.884	307.753	305.565	353.05	360.883	366.103	336.054	354.029	355.01
ENSG00000140836.17	ZFHX3	285.842	285.662	293.125	363.605	373.249	390.544	394.4	368.947	367.147
ENSG00000105810.10	CDK6	276.37	295.941	288.082	376.038	374.713	389.348	367.727	390.924	373.697
ENSG00000173812.11	EIF1	310.292	310.877	301.25	345.148	327.366	316.495	290.181	328.249	321.707
ENSG00000171848.16	RRM2	332.757	333.196	331.286	285.579	285.821	267.1	313.347	272.041	276.563
ENSG00000108055.10	SMC3	326.997	325.984	342.997	291.271	323.081	349.225	318.233	342.196	349.793
ENSG00000007168.14	PAFAH1B1	314.388	310.877	317.893	324.205	320.858	319.998	307.024	327.362	315.194
ENSG00000119707.14	RBM25	324.949	322.178	331.79	301.107	310.932	322.818	307.254	323.009	324.297
ENSG00000137142.5	IGFBPL1	326.165	322.519	311.673	300.775	305.726	294.019	269.429	308.766	299.579
ENSG00000196305.18	IARS1	341.462	340.693	331.79	273.477	270.256	255.905	266.9	273.055	263.982
ENSG00000136731.13	UGGT1	342.038	318.601	307.694	303.372	311.312	289.832	305.644	285.86	283.446
ENSG00000101210.13	EEF1A2	326.293	317.749	301.979	311.772	311.258	293.25	290.181	312.697	293.621
ENSG00000112159.12	MDN1	338.262	337.115	294.022	295.968	301.387	291.883	292.193	282.226	281.854
ENSG00000111605.18	CPSF6	295.955	302.642	322.936	319.563	335.827	346.149	337.721	340.336	345.426
ENSG00000152102.18	FAM168B	311.892	313.603	304.164	327.079	312.071	317.819	325.132	324.277	322.151
ENSG00000134884.15	ARGLU1	299.091	297.588	321.143	305.417	309.143	322.904	333.984	332.518	338.47
ENSG00000160007.19	ARHGAP35	308.116	309.628	295.198	338.959	325.739	326.151	328.351	326.347	330.773
ENSG00000163479.14	SSR2	301.139	313.319	296.655	319.342	315.217	316.025	313.232	333.828	329.737
ENSG00000150093.20	ITGB1	315.732	306.561	315.427	322.326	312.451	318.503	319.728	315.021	313.603
ENSG00000170153.11	RNF150	273.17	275.837	272.896	375.209	369.398	369.82	363.589	379.598	376.361
ENSG00000179295.18	PTPN11	325.013	321.099	323.721	300.112	296.56	299.275	294.665	295.158	304.611
ENSG00000198231.13	DDX42	300.243	296.395	304.332	321.055	319.61	330.766	338.64	335.518	338.877
ENSG00000218336.9	TENM3	269.713	264.478	269.534	364.323	367.988	366.146	373.591	380.02	373.216
ENSG00000116679.16	IVNS1ABP	299.475	297.361	297.944	318.237	312.668	312.991	302.31	314.007	325.555
ENSG00000164032.12	H2AZ1	311.252	312.524	304.108	298.067	288.642	270.988	263.278	299.638	308.423
ENSG00000104177.18	MYEF2	268.305	268.908	282.758	366.257	362.131	387.724	386.812	375.54	373.549
ENSG00000114391.13	RPL24	294.931	309.457	295.478	333.212	309.685	310.683	340.365	327.953	312.493
ENSG00000122218.16	COPA	292.371	289.239	291.108	346.032	337.996	331.407	326.684	341.181	343.909
ENSG00000197157.11	SND1	315.476	304.687	302.707	314.203	306.811	290.43	289.606	312.528	298.913
ENSG00000264364.3	DYNLL2	317.012	333.48	320.639	286.076	285.821	280.132	266.612	278.084	270.087
ENSG00000163939.18	PBRM1	307.604	303.551	297.496	313.982	318.092	314.956	316.336	306.526	308.534
ENSG00000182568.17	SATB1	282.77	277.256	290.996	339.733	349.657	331.193	346.458	332.687	347.313
ENSG00000197746.14	PSAP	287.571	290.034	280.797	338.02	329.969	312.307	316.796	332.94	336.508
ENSG00000152127.9	MGAT5	317.14	311.502	302.987	304.754	298.404	291.797	289.031	294.904	291.105
ENSG00000070087.14	PFN2	321.685	315.363	311.169	280.053	281.971	270.005	269.257	277.492	286.591
ENSG00000116984.15	MTR	291.795	292.704	299.121	327.797	325.142	332.774	343.469	326.559	315.601
ENSG00000145362.20	ANK2	300.819	296.111	281.694	326.802	315.217	321.28	312.025	321.572	317.637
ENSG00000168264.11	IRF2BP2	291.603	305.482	280.237	317.519	314.458	309.872	323.924	333.955	323.002
ENSG00000065526.12	SPEN	310.804	314.909	318.509	304.864	305.455	314.358	302.483	291.354	294.325
ENSG00000128595.17	CALU	316.244	312.07	314.026	289.281	283.652	280.004	287.594	284.17	285.222
ENSG00000167548.16	KMT2D	312.34	318.033	323.889	290.386	295.692	304.744	292.653	275.675	280.411
ENSG00000170315.14	UBB	266.001	275.496	271.215	355.868	354.158	346.832	357.093	352.465	359.265
ENSG00000100129.18	EIF3L	280.594	285.548	272.84	338.407	319.176	316.153	307.771	340.083	333.548
ENSG00000010292.13	NCAPD2	289.811	284.582	279.228	347.635	338.376	325.553	327.718	332.433	331.254
ENSG00000134294.14	SLC38A2	281.362	277.995	284.72	328.736	323.949	316.965	337.778	329.052	338.173
ENSG00000126261.13	UBA2	295.443	292.817	302.875	312.324	309.794	311.153	316.681	306.78	313.307
ENSG00000016082.15	ISL1	291.475	296.849	293.349	316.469	318.417	314.871	313.175	314.514	309.163
ENSG00000143384.14	MCL1	311.188	299.121	293.069	297.625	292.167	288.934	286.56	287.635	293.251
ENSG00000167522.16	ANKRD11	309.14	310.309	320.246	299.394	297.97	296.796	300.126	291.777	285.333
ENSG00000182899.17	RPL35A	286.61	297.701	277.155	325.421	301.821	296.668	306.679	329.263	308.497
ENSG00000115758.13	ODC1	297.427	302.245	293.797	295.47	311.746	301.283	281.328	317.768	309.718
ENSG00000140525.19	FANCI	311.7	308.662	307.806	282.263	279.584	277.013	270.004	282.184	293.14
ENSG00000122778.10	KIAA1549	307.22	301.052	302.875	308.456	305.4	296.284	297.079	291.988	284.593
ENSG00000102144.15	PGK 1.00	304.212	306.902	294.918	291.713	292.547	284.149	278.339	301.497	295.472
ENSG00000164118.13	CEP44	233.423	233.981	258.383	377.364	399.065	409.046	383.823	400.306	400.931
ENSG00000134313.16	KIDINS220	303.316	300.938	298.897	300.886	303.177	303.12	281.156	288.565	296.249
ENSG00000119772.17	DNMT3A	286.738	279.471	295.366	333.046	324.546	334.013	323.407	329.01	320.671
ENSG00000164742.16	ADCY1	329.109	316.613	308.647	267.951	265.537	270.005	245.343	275.717	255.064
ENSG00000100664.11	EIF5	292.691	293.612	292.172	292.21	280.506	287.14	312.83	302.427	301.762
ENSG00000108510.10	MED13	300.435	295.543	286.681	300.554	310.444	317.734	289.951	320.008	315.749
ENSG00000188229.6	TUBB4B	312.98	307.413	289.258	291.823	301.279	273.039	289.894	282.691	281.484
ENSG00000138760.10	SCARB2	289.363	288.785	285.672	317.242	316.627	313.162	313.232	314.007	316.453
ENSG00000203668.3	CHML	298.451	300.541	293.909	283.092	319.339	321.964	282.478	324.446	313.677
ENSG00000106105.15	GARS1	325.781	332.458	314.139	248.058	245.09	229.968	245.976	237.048	233.417
ENSG00000163171.8	CDC42EP3	287.251	286.627	283.431	308.456	313.21	304.744	324.729	302.469	307.942
ENSG00000184787.19	UBE2G2	307.988	300.882	317.669	288.176	282.567	289.532	286.962	273.942	292.215
ENSG00000145907.16	G3BP1	307.924	295.202	297.776	279.39	282.73	277.654	293.515	277.873	278.783
ENSG00000172354.10	GNB2	306.964	306.958	289.483	277.401	275.354	267.57	262.933	280.62	275.342
ENSG00000169714.17	CNBP	287.699	290.489	286.569	295.249	284.303	290.985	307.024	300.314	307.942
ENSG00000084754.12	HADHA	277.33	269.533	276.931	326.029	324.925	313.76	311.968	322.797	317.489
ENSG00000166165.13	CKB	309.972	307.753	281.974	262.757	258.595	249.111	249.137	275.675	266.054
ENSG00000068796.19	KIF2A	297.107	299.689	300.298	289.392	301.387	311.239	279.144	291.481	294.214
ENSG00000114942.14	EEF1B2	284.37	287.706	282.142	304.975	297.645	295.771	314.957	300.525	297.507
ENSG00000163539.17	CLASP2	272.914	276.064	273.68	318.458	325.522	329.783	297.999	316.416	320.967
ENSG00000162244.12	RPL29	280.21	284.98	255.805	316.192	295.313	281.457	276.212	320.346	321.892
ENSG00000109475.17	RPL34	280.978	283.39	276.706	307.462	293.197	291.541	285.87	317.557	311.531
ENSG00000143442.22	POGZ	288.595	294.578	302.595	308.843	304.424	295.13	314.957	294.144	300.467
ENSG00000213639.10	PPP1CB	294.355	283.617	287.409	280.385	295.15	295.643	288.629	289.326	287.923
ENSG00000078674.18	PCM1	282.002	283.39	277.995	309.617	330.566	345.807	312.83	333.49	332.179
ENSG00000144642.22	RBMS3	277.458	281.005	272.784	298.178	313.21	308.974	320.763	324.572	318.673
ENSG00000111530.13	CAND1	295.955	295.202	288.866	287.126	289.455	277.867	268.739	283.367	284.778
ENSG00000116754.13	SRSF11	270.033	280.38	303.604	292.542	300.953	311.923	290.239	312.485	321.633
ENSG00000101057.16	MYBL2	323.029	320.191	307.526	240.377	241.131	233.173	249.022	237.893	234.379
ENSG00000007202.15	KIAA0100	298.131	300.541	296.039	272.593	271.286	267.1	264.141	266.885	265.388
ENSG00000106333.13	PCOLCE	292.563	288.785	292.397	278.506	272.263	263.468	266.555	276.689	275.712
ENSG00000198830.11	HMGN2	288.275	289.41	282.086	281.545	277.903	276.329	292.595	287.34	285.74
ENSG00000176890.16	TYMS	303.636	297.588	292.172	265.354	257.727	253.085	245.631	260.081	265.758
ENSG00000147548.17	NSD3	281.298	282.595	283.431	302.046	305.943	308.803	280.409	291.862	299.986
ENSG00000076356.7	PLXNA2	356.119	337.342	315.595	216.671	218.84	192.324	214.474	181.051	210.216
ENSG00000105426.17	PTPRS	277.714	291.625	293.461	294.144	296.452	292.908	294.78	297.102	285.962
ENSG00000170540.15	ARL6IP1	273.81	269.022	266.62	319.232	323.027	302.394	308.116	318.529	322.299
ENSG00000143761.16	ARF1	306.26	296.338	283.095	263.088	265.266	248.171	254.656	266.758	262.354
ENSG00000121892.15	PDS5A	298.067	287.82	291.388	283.755	290.052	282.397	275.005	273.393	285.333
ENSG00000115461.5	IGFBP5	312.468	290.943	279.732	261.486	261.036	226.507	272.303	225.933	258.727
ENSG00000101126.18	ADNP	268.689	269.192	276.706	307.075	305.889	304.359	304.437	302.554	291.734
ENSG00000150991.15	UBC	227.151	239.66	229.86	357.195	348.355	343.756	334.674	350.225	352.642
ENSG00000116539.14	ASH1L	283.73	286.854	272.504	292.928	293.36	309.829	288.054	288.143	291.031
ENSG00000143324.14	XPR1	331.413	332.401	313.074	224.241	230.121	216.594	222.924	211.648	221.613
ENSG00000108946.15	PRKAR1A	288.723	285.037	295.591	278.395	284.682	264.109	280.121	271.66	279.301
ENSG00000174197.16	MGA	309.396	292.704	272.111	272.759	283.218	286.67	267.417	261.898	265.351
ENSG00000136842.14	TMOD1	250.64	238.695	243.757	356.476	339.352	343.542	351.632	354.325	348.127
ENSG00000072274.13	TFRC	303.316	299.916	289.315	256.071	264.127	263.98	246.148	255.432	265.573
ENSG00000124486.13	USP9X	265.489	264.705	264.434	333.931	329.047	329.057	301.046	316.374	318.858
ENSG00000076003.5	MCM6	310.42	306.845	295.759	235.348	231.477	224.2	226.086	232.272	233.824
ENSG00000124207.17	CSE1L	289.427	277.597	283.095	271.875	284.249	262.998	270.866	284.001	271.345
ENSG00000160014.17	CALM3	280.338	282.368	276.034	280.274	291.733	272.526	293.745	278.76	285.74
ENSG00000115875.19	SRSF7	290.899	287.308	300.466	249.661	256.86	253.512	246.838	253.319	254.287
ENSG00000203879.12	GDI1	283.154	283.163	290.211	265.962	268.737	271.714	280.524	273.013	270.864
ENSG00000169813.16	HNRNPF	292.755	293.442	290.043	264.857	260.06	254.922	267.992	258.897	255.027
ENSG00000275023.5	MLLT6	268.817	277.54	284.776	280.992	288.154	296.925	294.492	291.312	291.216
ENSG00000167004.13	PDIA3	340.374	335.865	326.579	187.052	188.197	184.419	189.239	182.023	181.76
ENSG00000101752.12	MIB1	280.082	282.936	272.167	284.253	290.594	295.301	273.683	293.003	297.433
ENSG00000244879.8	GABPB1-AS1	239.887	248.747	273.512	343.269	337.128	360.847	335.651	348.324	353.382
ENSG00000157106.17	SMG1	292.307	289.296	260.064	283.424	292.98	297.694	265.635	268.913	275.416
ENSG00000106263.18	EIF3B	276.818	277.711	273.064	270.272	264.507	266.074	271.556	273.647	272.234
ENSG00000092148.13	HECTD1	293.971	294.521	282.03	269.775	263.639	267.014	246.263	263.715	262.132
ENSG00000109606.13	DHX15	274.962	282.765	273.288	275.245	273.564	274.235	267.187	278.803	275.897
ENSG00000170606.15	HSPA4	295.699	304.232	308.759	246.732	233.321	228.131	234.881	225.679	229.754
ENSG00000111249.14	CUX2	347.734	342.283	318.173	187.826	188.143	173.737	195.562	170.105	183.537
ENSG00000168137.18	SETD5	280.722	272.032	283.711	295.857	286.798	296.711	285.352	277.831	284.704
ENSG00000184575.12	XPOT	300.179	295.941	293.181	239.659	243.572	241.291	244.883	237.217	242.964
ENSG00000048649.13	RSF1	271.249	267.375	268.077	292.21	310.607	330.681	280.409	319.966	311.309
ENSG00000087245.13	MMP2	315.86	316.159	284.495	230.596	230.827	208.732	224.764	219.678	225.202
ENSG00000162923.17	WDR26	267.473	264.762	273.288	300.057	298.946	304.659	296.849	290.763	285.481
ENSG00000175455.16	CCDC14	275.026	274.985	273.12	260.27	285.116	299.745	265.578	281.676	292.918
ENSG00000170889.14	RPS9	262.801	277.256	249.025	279.943	273.13	262.186	271.729	292.918	282.965
ENSG00000120948.19	TARDBP	302.612	288.728	287.521	234.63	241.457	245.778	255.575	247.402	248.995
ENSG00000018236.15	CNTN1	221.07	219.215	230.589	358.908	361.697	369.222	348.815	387.078	366.444
ENSG00000225733.6	FGD5-AS1	290.067	289.694	284.664	249.053	243.897	240.821	247.585	244.782	255.212
ENSG00000137076.21	TLN1	266.129	263.683	256.365	290.939	286.96	278.551	284.49	284.973	269.828
ENSG00000123562.18	MORF4L2	275.026	279.358	276.706	266.459	260.982	268.339	270.062	271.787	269.68
ENSG00000057608.17	GDI2	265.873	267.431	271.103	289.502	277.469	278.893	262.014	285.226	284.371
ENSG00000120063.10	GNA13	268.497	269.93	267.853	284.584	282.296	270.475	270.062	276.098	274.824
ENSG00000111328.7	CDK2AP1	293.843	289.921	285.56	228.109	224.969	214.927	227.408	222.129	226.46
ENSG00000135624.16	CCT7	287.187	278.335	274.913	269.941	252.521	250.136	260.059	252.22	257.95
ENSG00000105373.19	NOP53	255.888	265.671	244.261	285.192	290.16	276.201	287.077	301.286	287.627
ENSG00000114554.11	PLXNA1	286.354	284.469	287.409	232.862	244.819	234.326	228.5	233.794	239.819
ENSG00000113758.13	DBN1	260.689	268.227	264.322	277.069	285.93	275.005	289.319	284.423	278.413
ENSG00000075415.14	SLC25A3	257.937	260.73	244.71	289.502	273.185	269.834	250.057	290.805	286.776
ENSG00000067369.14	TP53BP1	265.425	266.012	263.818	278.782	281.103	281.499	269.544	269.294	264.944
ENSG00000123908.12	AGO2	278.802	277.427	272.223	269.554	268.737	259.921	276.097	249.642	256.877
ENSG00000197111.16	PCBP2	250.448	251.359	257.878	284.308	296.18	292.267	322.315	293.003	300.652
ENSG00000277586.4	NEFL	245.072	252.325	248.576	297.681	296.18	286.841	275.005	288.438	278.043
ENSG00000149187.18	CELF1	274.578	273.054	276.202	268.835	249.592	248.812	300.816	261.053	252.622
ENSG00000132646.11	PCNA	278.61	281.913	280.573	241.206	233.701	225.994	229.075	239.33	241.299
ENSG00000102317.18	RBM3	285.65	284.469	289.202	231.536	222.257	217.619	231.605	231.089	238.005
ENSG00000189060.5	H1-0	225.999	220.238	228.515	349.569	337.399	333.33	346.918	341.308	331.032
ENSG00000159335.18	PTMS	280.594	273.508	274.745	273.753	256.697	242.402	279.317	267.35	249.439
ENSG00000170004.17	CHD3	263.505	268.397	283.151	278.229	267.327	269.963	282.938	266.842	263.501
ENSG00000137285.11	TUBB2B	239.823	242.727	229.58	318.458	308.872	303.975	302.885	331.503	309.052
ENSG00000184445.12	KNTC1	264.529	259.992	263.65	262.37	278.391	281.713	284.663	274.914	279.375
ENSG00000171862.11	PTEN	230.031	229.381	232.606	319.342	330.132	322.605	322.602	339.533	334.177
ENSG00000140350.15	ANP32A	269.329	271.293	269.926	264.967	259.897	258.169	263.048	259.742	267.571
ENSG00000139514.13	SLC7A1	297.619	293.783	275.698	228.22	243.518	214.158	218.785	231.004	231.456
ENSG00000130985.17	UBA1	258.833	258.402	256.477	273.919	282.784	264.792	252.931	274.788	266.165
ENSG00000173273.16	TNKS	251.664	257.095	255.357	293.26	290.92	282.739	267.245	280.535	278.635
ENSG00000164292.13	RHOBTB3	259.281	258.118	249.305	295.802	289.998	286.285	273.856	279.225	285.555
ENSG00000179010.15	MRFAP1	276.882	269.249	272.84	252.7	250.406	240.65	246.838	248.839	257.58
ENSG00000047315.17	POLR2B	268.881	259.481	269.534	268.283	268.574	263.724	265.348	266.293	272.308
ENSG00000116199.12	FAM20B	267.473	269.078	261.857	261.21	267.436	263.596	275.293	258.897	262.095
ENSG00000117139.18	KDM5B	233.487	226.428	236.977	349.956	341.033	337.389	317.716	322.206	307.128
ENSG00000115266.12	APC2	261.969	262.831	254.628	268.835	275.896	265.049	255.346	266.462	267.83
ENSG00000153317.15	ASAP1	253.584	265.387	272.56	279.445	273.51	271.33	283.398	277.281	269.088
ENSG00000099622.14	CIRBP	235.663	239.547	247.68	285.137	279.639	273.21	298.171	304.033	307.72
ENSG00000107957.16	SH3PXD2A	329.173	320.304	310.552	190.754	195.085	179.975	196.711	173.528	186.09
ENSG00000136450.13	SRSF1	277.842	281.629	266.788	231.978	233.864	240.479	239.882	233.16	236.303
ENSG00000115825.11	PRKD3	255.824	259.424	248.352	289.834	287.665	286.755	269.659	292.495	295.99
ENSG00000115310.18	RTN4	268.497	267.488	258.046	272.483	267.869	250.478	238.33	265.025	267.534
ENSG00000205581.11	HMGN1	238.095	248.293	262.305	270.217	263.693	280.987	272.476	289.072	289.588
ENSG00000060749.16	QSER1	260.753	266.239	257.43	272.206	294.391	295.344	258.335	271.111	269.051
ENSG00000156976.17	EIF4A2	247.568	252.836	269.758	269.775	260.927	263.596	261.554	277.323	270.42
ENSG00000100813.14	ACIN1	267.665	256.527	265.275	259.441	259.463	261.374	273.626	257.714	257.358
ENSG00000110917.8	MLEC	304.02	299.291	290.771	201.475	199.478	196.81	183.778	193.518	189.235
ENSG00000119596.18	YLPM1	256.273	254.71	264.715	275.411	274.92	278.124	293.343	264.603	258.838
ENSG00000137309.20	HMGA1	261.649	265.671	251.938	262.094	263.91	250.093	276.442	257.122	254.398
ENSG00000124181.14	PLCG1	243.216	247.611	263.594	271.433	274.595	281.371	282.018	273.9	279.116
ENSG00000123684.13	LPGAT1	285.202	281.345	274.857	236.73	231.043	223.687	241.089	222.425	226.312
ENSG00000183495.14	EP400	266.321	268.794	269.534	253.694	257.131	261.032	258.45	245.711	246.035
ENSG00000172270.22	BSG	268.369	265.217	249.865	248.942	250.839	240.052	248.907	250.149	245.702
ENSG00000187079.20	TEAD1	241.168	231.312	240.171	300.057	309.305	306.71	291.446	289.537	302.28
ENSG00000132466.19	ANKRD17	266.705	270.328	275.137	269.056	266.025	259.494	248.562	256.361	252.881
ENSG00000143742.14	SRP9	262.161	263.91	265.947	239.327	246.392	245.821	239.365	250.572	252.992
ENSG00000073111.14	MCM2	271.57	269.419	261.184	232.585	233.918	223.217	235.686	239.795	238.375
ENSG00000138160.7	KIF11	254.672	250.848	241.964	281.821	290.214	295.728	276.155	289.833	286.887
ENSG00000123200.17	ZC3H13	272.53	277.484	272.28	246.234	257.727	277.269	256.553	271.069	272.53
ENSG00000130741.11	EIF2S3	248.08	255.903	244.878	271.93	278.011	261.887	270.866	274.619	271.271
ENSG00000072364.13	AFF4	242	249.883	241.46	295.581	289.455	299.531	268.509	275.464	276.6
ENSG00000133318.14	RTN3	251.216	258.629	241.628	264.691	248.453	242.103	237.928	260.503	252.548
ENSG00000054118.15	THRAP3	254.736	251.359	257.262	258.999	254.744	251.119	280.811	267.941	266.165
ENSG00000103342.13	GSPT1	271.121	270.725	263.706	242.035	248.182	239.069	241.204	231.849	235.785
ENSG00000115355.17	CCDC88A	237.199	255.335	247.624	267.454	290.811	326.194	284.203	305.385	303.797
ENSG00000163781.14	TOPBP1	262.673	259.026	260.568	252.313	253.768	259.708	259.14	260.376	265.98
ENSG00000171094.18	ALK	220.174	215.638	234.735	306.633	314.675	322.605	308.634	324.446	301.318
ENSG00000047849.21	MAP4	260.753	259.424	254.292	251.429	251.49	248.769	256.093	249.008	244.555
ENSG00000138083.5	SIX3	255.312	251.53	255.132	266.459	272.696	260.989	268.452	261.348	259.615
ENSG00000104408.11	EIF3E	235.983	237.502	250.201	287.789	283.598	289.874	289.434	303.61	295.435
ENSG00000071564.17	TCF3	260.817	265.33	250.706	257.507	256.263	251.247	257.587	257.207	256.692
ENSG00000003147.19	ICA1	185.612	192.921	209.631	363.439	348.735	380.887	346.516	399.714	367.628
ENSG00000122012.14	SV2C	261.841	259.424	241.236	262.757	259.897	248.085	272.246	247.191	254.472
ENSG00000165671.21	NSD1	266.449	262.661	256.365	251.595	249.05	251.632	243.676	243.007	243.593
ENSG00000088325.16	TPX2	233.487	239.263	240.227	294.144	287.72	282.14	286.675	273.139	276.304
ENSG00000172403.11	SYNPO2	291.411	271.691	266.003	223.191	222.962	214.415	222.12	195.884	212.066
ENSG00000215021.10	PHB2	251.856	254.994	239.05	268.062	253.28	256.588	256.955	269.885	264.796
ENSG00000131051.24	RBM39	254.16	257.663	262.809	244.632	249.484	246.974	254.311	247.909	245.665
ENSG00000087274.17	ADD1	262.289	254.767	247.007	262.923	258.324	249.196	257.185	259.742	254.99
ENSG00000113368.12	LMNB1	245.584	247.498	253.563	260.16	259.137	239.582	271.441	253.361	252.585
ENSG00000134824.14	FADS2	255.888	247.782	253.62	250.71	248.073	240.266	251.494	255.601	255.619
ENSG00000184897.6	H1-10	226.575	223.475	212.433	311.993	304.424	294.104	300.413	313.119	309.57
ENSG00000149428.19	HYOU1	325.909	316.045	297.496	149.476	142.856	140.921	149.747	144.494	143.573
ENSG00000180370.10	PAK2	250.128	250.905	239.891	265.907	272.208	263.98	268.567	254.122	257.802
ENSG00000109332.20	UBE2D3	255.888	261.298	249.081	251.484	246.772	242.231	249.597	248.881	249.995
ENSG00000165280.18	VCP	278.674	269.419	254.908	217.776	210.109	207.621	213.497	212.747	218.32
ENSG00000111602.12	TIMELESS	253.264	249.94	259.783	245.516	240.643	230.224	248.677	237.132	240.485
ENSG00000163714.18	U2SURP	256.785	258.515	267.965	237.393	255.612	253.384	229.593	262.616	258.431
ENSG00000165462.5	PHOX2A	247.632	254.426	247.736	252.589	271.124	251.632	260.864	275.887	261.17
ENSG00000104517.13	UBR5	244.88	240.796	236.865	271.654	277.903	282.311	261.899	266.124	265.647
ENSG00000186298.12	PPP1CC	248.4	241.307	244.766	262.039	254.473	248.513	245.746	256.953	259.911
ENSG00000156261.13	CCT8	257.425	265.501	264.154	244.964	242.108	230.78	238.33	238.823	241.336
ENSG00000130559.19	CAMSAP1	257.553	247.952	241.908	267.675	255.612	250.008	261.669	255.981	262.909
ENSG00000159023.22	EPB41	256.465	262.831	251.994	250.103	249.646	238.599	244.309	240.133	247.33
ENSG00000183337.18	BCOR	248.336	246.475	231.709	279.335	275.788	285.174	293.515	284.043	270.901
ENSG00000101972.19	STAG2	246.864	252.95	251.322	257.121	264.615	268.296	235.169	261.095	253.251
ENSG00000173898.14	SPTBN2	267.985	271.804	258.102	223.081	218.461	222.149	228.558	218.157	220.318
ENSG00000136758.19	YME1L1	250.704	251.984	251.714	258.391	253.117	259.836	242.009	261.644	253.584
ENSG00000134986.14	NREP	231.887	232.618	227.283	276.959	268.954	261.075	273.798	283.663	266.794
ENSG00000143797.12	MBOAT2	255.504	265.16	258.943	226.894	225.891	223.901	207.863	225.764	226.719
ENSG00000038219.13	BOD1L1	243.024	262.831	247.343	232.972	263.422	293.464	262.359	281.423	268.311
ENSG00000221978.12	CCNL2	223.822	239.547	258.999	234.188	247.151	261.417	242.929	261.517	278.08
ENSG00000131558.15	EXOC4	216.846	222.566	220.446	292.431	277.849	275.774	292.538	291.523	285.74
ENSG00000060709.15	RIMBP2	259.601	262.661	259.279	230.265	246.012	238.898	236.778	227.158	233.639
ENSG00000141027.21	NCOR1	257.745	256.073	248.8	246.677	235.545	248.726	246.723	242.33	245.036
ENSG00000172292.15	CERS6	246.672	238.525	237.537	266.404	263.693	256.887	239.71	259.362	255.73
ENSG00000146701.12	MDH2	248.592	251.53	238.041	246.345	238.094	229.925	242.871	237.766	237.968
ENSG00000100345.22	MYH9	278.162	269.078	254.124	222.197	221.281	212.022	219.935	209.746	205.184
ENSG00000100644.17	HIF1A	239.823	232.845	237.033	269.388	276.276	284.49	277.247	276.605	272.863
ENSG00000063244.13	U2AF2	267.409	253.972	257.71	225.291	223.342	215.739	223.959	219.424	218.875
ENSG00000240694.9	PNMA2	240.784	251.189	247.904	255.242	247.097	250.82	245.803	255.77	249.032
ENSG00000175390.15	EIF3F	245.776	244.942	240.955	247.34	249.972	255.776	242.182	252.347	249.18
ENSG00000088930.8	XRN2	235.151	232.732	233.895	268.283	256.588	262.955	266.153	268.66	263.131
ENSG00000084207.18	GSTP1	249.68	250.564	241.684	232.088	231.965	220.269	230.915	230.497	241.41
ENSG00000101266.19	CSNK2A1	240.72	241.137	242.636	249.826	248.941	238.172	264.773	248.036	242.927
ENSG00000008300.17	CELSR3	229.007	226.371	240.619	259.276	259.409	259.494	251.839	260.926	256.988
ENSG00000119318.13	RAD23B	246.608	249.145	243.421	245.129	244.711	230.224	232.697	244.275	236.71
ENSG00000108021.20	TASOR2	257.809	264.194	255.245	230.154	245.036	238.428	220.108	230.624	233.084
ENSG00000167325.15	RRM1	253.52	249.883	254.012	236.067	227.084	226.806	216.314	224.073	226.127
ENSG00000276293.5	PIP4K2B	253.072	243.181	237.369	243.858	234.189	234.583	225.971	233.794	232.085
ENSG00000058262.10	SEC61A1	264.977	269.703	248.576	212.913	216.346	196.34	194.297	213.973	212.214
ENSG00000265241.7	RBM8A	253.136	256.471	244.205	234.188	218.298	218.987	219.59	229.06	226.386
ENSG00000134440.12	NARS1	259.025	255.562	256.421	215.897	215.803	213.218	205.966	212.578	221.317
ENSG00000082641.16	NFE2L1	252.176	248.633	244.934	227.281	230.989	228.857	235.743	227.327	231.345
ENSG00000140262.18	TCF12	240.015	233.924	245.158	257.728	249.917	250.393	252.356	253.192	261.244
ENSG00000135720.13	DYNC1LI2	237.199	232.334	246.839	261.541	249.755	252.657	264.026	246.514	259.467
ENSG00000172466.16	ZNF24	248.848	238.865	241.123	245.185	253.768	250.179	235.686	238.273	236.044
ENSG00000090621.15	PABPC4	241.168	239.092	238.602	238.056	244.114	231.677	242.699	238.78	243.186
ENSG00000198910.14	L1CAM	237.775	241.762	241.852	248.666	257.782	251.076	240.285	241.57	245.591
ENSG00000136938.9	ANP32B	236.879	240.796	236.585	252.147	247.531	232.105	248.562	246.261	237.672
ENSG00000135164.19	DMTF1	233.871	233.811	249.529	250.379	269.171	277.568	243.619	253.572	264.167
ENSG00000178209.16	PLEC	251.664	248.293	252.219	233.691	221.606	223.345	230.11	217.776	212.029
ENSG00000166402.9	TUB	244.688	247.668	254.236	239.051	240.318	238.599	230.8	243.894	250.698
ENSG00000155096.14	AZIN1	251.28	246.986	249.081	226.839	231.532	225.866	223.269	227.454	219.948
ENSG00000106443.17	PHF14	226.127	233.186	237.537	247.837	260.06	267.1	252.414	273.266	265.24
ENSG00000196208.14	GREB1	249.04	247.838	252.499	231.922	234.46	228.729	236.893	226.06	226.423
ENSG00000108389.9	MTMR4	251.728	260.105	254.068	220.76	227.735	220.226	212.75	224.961	223.315
ENSG00000158941.16	CCAR2	242	252.609	242.02	228.441	228.006	218.517	225.511	231.004	224.61
ENSG00000170348.9	TMED10	262.865	251.757	256.085	224.628	214.393	207.792	205.392	207.211	216.544
ENSG00000136381.13	IREB2	225.487	233.754	228.459	250.047	256.643	255.776	238.33	253.657	255.101
ENSG00000147677.11	EIF3H	218.126	219.215	221.287	267.067	255.07	254.879	251.667	276.774	261.503
ENSG00000143612.21	C1orf43	244.944	241.648	229.132	243.748	232.508	227.703	226.258	239.879	237.672
ENSG00000174780.17	SRP72	245.52	242.443	239.779	240.93	236.033	231.763	236.836	242.035	243.038
ENSG00000168439.17	STIP1	274.898	269.703	267.685	181.084	179.411	179.804	175.845	172.049	175.322
ENSG00000095002.15	MSH2	252.816	250.11	246.559	220.65	221.823	219.756	205.564	219.086	219.43
ENSG00000169504.15	CLIC4	249.424	247.27	234.399	222.584	224.264	217.619	213.21	226.102	224.758
ENSG00000084234.18	APLP2	244.496	232.789	239.05	238.332	241.511	235.181	248.217	237.344	238.968
ENSG00000108829.10	LRRC59	270.929	262.547	252.163	196.833	187.872	183.863	188.031	188.996	184.61
ENSG00000111676.15	ATN1	237.199	243.863	241.348	235.404	244.006	234.284	260.864	229.483	227.311
ENSG00000196712.18	NF1	225.551	216.887	215.067	274.859	276.276	279.619	268.165	263.588	267.867
ENSG00000048052.23	HDAC9	217.102	219.954	211.704	263.254	273.51	264.792	262.646	267.941	269.495
ENSG00000115904.14	SOS 1	236.367	236.423	221.847	255.739	262.826	264.493	231.432	255.347	252.437
ENSG00000198625.13	MDM4	214.798	221.373	223.528	248.5	249.592	264.579	285.122	249.346	258.949
ENSG00000008283.16	CYB561	263.633	251.871	235.296	215.179	207.126	204.117	202.345	208.986	210.216
ENSG00000140391.15	TSPAN3	241.68	236.537	238.322	221.092	228.549	210.825	219.073	231.976	224.425
ENSG00000247627.2	MTND4P12	220.43	215.921	218.597	258.834	238.04	253.939	289.376	283.113	259.763
ENSG00000112078.14	KCTD20	225.999	229.779	234.287	254.137	242.433	236.719	230.167	244.232	240.929
ENSG00000010244.19	ZNF207	235.791	230.687	230.028	230.817	237.498	246.761	255.863	241.527	241.706
ENSG00000148798.11	INA	238.927	236.253	238.041	223.965	220.034	217.406	218.843	223.82	218.801
ENSG00000107290.14	SETX	253.84	256.13	238.041	218.384	230.555	231.335	205.219	224.031	216.655
ENSG00000145833.16	DDX46	241.872	242.273	255.861	220.318	218.244	237.317	233.042	232.019	233.639
ENSG00000163638.13	ADAMTS9	243.28	243.806	240.283	222.639	212.115	219.072	219.303	213.677	209.217
ENSG00000004478.8	FKBP4	261.265	258.686	238.154	195.065	187.33	180.573	177.742	179.656	180.539
ENSG00000111206.13	FOXM1	235.599	229.779	233.895	234.906	236.087	219.371	236.663	226.06	226.46
ENSG00000068489.13	PRR11	204.749	209.447	205.597	298.952	288.099	274.663	270.291	285.226	287.96
ENSG00000171316.12	CHD7	232.399	233.073	223.752	246.29	242.541	238.685	246.608	235.315	235.23
ENSG00000116698.21	SMG7	237.007	236.878	241.404	227.336	217.756	225.14	227.696	217.988	215.211
ENSG00000161970.15	RPL26	220.942	219.272	242.861	247.45	241.782	256.46	274.66	246.05	242.224
ENSG00000113649.12	TCERG1	225.039	227.45	236.304	238.222	242.758	250.222	243.849	229.694	236.599
ENSG00000143476.18	DTL	247.056	252.495	240.731	186.61	186.787	175.83	186.422	189.714	192.602
ENSG00000095787.24	WAC	230.223	234.095	233.503	227.778	243.843	229.883	238.1	229.356	231.382
ENSG00000168092.14	PAFAH1B2	232.719	224.724	224.929	232.309	235.274	229.327	232.639	234.977	229.976
ENSG00000101596.16	SMCHD1	242	238.411	242.917	221.202	231.586	237.317	214.532	224.454	227.349
ENSG00000196584.3	XRCC2	240.912	250.224	254.068	205.895	210.488	218.688	222.35	216.762	223.241
ENSG00000253719.4	ATXN7L3B	230.159	229.608	222.8	241.482	230.555	222.405	224.189	234.47	228.977
ENSG00000106682.16	EIF4H	231.759	234.152	231.037	218.881	219.22	218.559	216.486	231.976	225.276
ENSG00000196504.19	PRPF40A	232.719	235.344	249.361	224.131	235.87	235.865	219.993	242.669	244.703
ENSG00000175414.7	ARL 10.00	234.831	241.818	226.442	232.53	222.528	220.525	210.91	220.481	219.874
ENSG00000104341.17	LAPTM4B	239.887	235.515	222.856	220.428	207.234	199.972	202.92	217.861	218.431
ENSG00000205060.11	SLC35B4	230.287	240.171	238.994	220.263	215.424	213.09	201.195	207.718	210.401
ENSG00000205937.12	RNPS1	238.223	238.354	234.623	217.666	214.773	209.586	218.785	215.071	221.169
ENSG00000166503.9	HDGFL3	238.415	240.512	235.24	219.71	228.603	226.507	230.512	223.608	227.497
ENSG00000136824.19	SMC2	241.936	238.411	236.865	206.282	218.407	227.404	213.957	222.848	234.675
ENSG00000278540.5	ACACA	221.262	216.149	217.364	243.306	239.775	233.728	232.409	239.626	236.155
ENSG00000115268.10	RPS15	219.15	219.84	204.588	233.249	217.268	204.843	221.257	239.583	232.307
ENSG00000136240.10	KDELR2	248.656	243.011	231.541	189.981	193.241	178.522	181.823	192.081	190.345
ENSG00000049618.24	ARID1B	218.83	219.897	210.416	238.83	244.277	245.949	271.901	241.866	236.007
ENSG00000198431.16	TXNRD1	217.486	221.317	204.084	208.658	205.444	209.33	223.384	208.901	210.549
ENSG00000234456.8	MAGI2-AS3	227.535	233.868	240.619	218.55	223.993	235.608	214.417	217.016	218.801
ENSG00000107130.10	NCS1	250.96	247.384	238.546	193.13	194.434	185.615	184.985	190.813	192.01
ENSG00000133657.16	ATP13A3	240.656	243.295	225.77	206.724	214.068	207.236	204.817	213.592	208.366
ENSG00000074054.20	CLASP1	218.254	228.586	215.683	232.917	236.684	234.455	237.238	235.526	234.86
ENSG00000117519.16	CNN3	205.965	213.195	220.11	248.113	243.735	242.958	245.401	253.234	243.889
ENSG00000120733.14	KDM3B	212.366	220.862	220.278	241.482	240.426	239.582	242.986	236.076	228.644
ENSG00000121741.17	ZMYM2	219.47	221.771	218.093	242.311	237.714	252.828	252.529	250.064	240.966
ENSG00000178252.18	WDR6	210.958	210.072	216.468	234.52	237.335	235.395	231.662	241.823	237.968
ENSG00000224940.9	PRRT4	244.56	241.818	232.158	192.578	197.255	193.435	180.673	197.237	193.934
ENSG00000088205.13	DDX18	228.367	232.448	225.994	218.329	224.481	219.243	214.417	226.778	225.646
ENSG00000099901.17	RANBP1	239.311	230.063	237.145	200.369	195.628	194.076	218.498	191.278	198.967
ENSG00000102241.12	HTATSF1	222.094	228.018	230.813	221.589	215.044	219.542	232.294	217.988	219.763
ENSG00000128731.18	HERC2	235.727	231.823	227.619	226.894	219.491	209.843	212.692	204.379	206.22
ENSG00000131016.17	AKAP12	221.198	215.467	218.821	248.887	238.474	238.471	243.734	239.245	236.895
ENSG00000124193.16	SRSF6	222.35	213.65	222.856	229.38	222.8	229.712	225.339	232.991	235.378
ENSG00000105220.17	GPI	233.295	228.813	211.704	221.368	219.383	207.279	225.166	213.508	215.1
ENSG00000104824.18	HNRNPL	219.15	213.366	219.325	226.175	227.41	221.935	232.409	232.145	225.831
ENSG00000143776.18	CDC42BPA	219.982	224.951	218.765	226.949	233.43	231.677	221.315	230.328	225.683
ENSG00000104964.15	TLE5	230.671	228.529	224.537	216.395	206.095	200.186	209.128	208.183	207.626
ENSG00000152926.15	ZNF117	213.966	230.063	243.869	209.321	227.844	254.495	210.45	241.232	238.783
ENSG00000197969.14	VPS13A	231.631	223.929	206.437	227.833	243.138	248	218.211	235.442	246.701
ENSG00000100888.15	CHD8	220.43	220.294	228.235	233.083	237.714	235.01	232.524	224.158	223.574
ENSG00000115484.15	CCT4	242.832	235.231	223.528	205.84	203.383	194.802	188.664	198.674	195.822
ENSG00000143153.13	ATP1B1	240.143	231.142	228.011	204.79	195.465	179.163	188.376	195.208	202.667
ENSG00000070814.22	TCOF1	236.431	233.584	228.347	204.017	206.854	203.989	209.186	194.87	193.194
ENSG00000177565.18	TBL1XR1	209.806	216.603	215.739	238.167	240.806	226.806	263.968	247.402	253.029
ENSG00000187555.16	USP7	220.558	220.294	222.015	226.562	225.295	218.602	224.476	213.17	220.429
ENSG00000173064.13	HECTD4	216.014	217.568	226.834	239.051	235.979	240.65	235.743	222.171	223.278
ENSG00000055332.19	EIF2AK2	229.263	234.152	237.929	208.935	206.746	211.68	207.921	196.392	207.589
ENSG00000169905.13	TOR1AIP2	227.023	228.529	229.076	220.373	217.105	223.559	222.752	210.761	210.697
ENSG00000166341.9	DCHS1	214.542	213.65	204.756	232.53	238.745	231.506	227.293	238.316	239.745
ENSG00000164828.18	SUN1	212.75	216.773	232.27	219.268	233.809	238.343	217.118	225.764	221.391
ENSG00000140948.13	ZCCHC14	211.918	219.272	212.601	238.388	237.172	233.771	218.498	229.948	227.978
ENSG00000170471.15	RALGAPB	228.687	215.638	221.567	219.379	219.112	210.526	205.507	214.184	213.657
ENSG00000154473.18	BUB3	217.358	215.524	206.493	221.092	219.274	207.45	222.235	224.749	232.455
ENSG00000136492.9	BRIP1	233.551	227.337	231.205	199.651	212.386	215.312	193.722	204.126	208.958
ENSG00000263001.7	GTF2I	220.686	227.621	223.528	213.19	212.224	214.244	216.141	208.648	209.365
ENSG00000005483.21	KMT2E	218.958	214.729	229.58	250.158	246.446	256.246	227.006	215.959	217.654
ENSG00000169564.7	PCBP1	227.599	218.591	207.502	216.008	219.274	206.681	208.668	215.071	208.477
ENSG00000113569.16	NUP155	219.278	220.294	213.161	206.89	209.892	204.587	220.108	204.21	206.775
ENSG00000061676.15	NCKAP1	217.486	217.966	211.368	229.601	226.542	221.166	219.475	229.06	229.754
ENSG00000079785.16	DDX1	209.87	212.798	220.558	220.871	216.129	217.278	222.752	230.877	224.573
ENSG00000139644.13	TMBIM6	217.614	220.465	204.14	227.778	221.769	205.399	205.392	220.143	218.283
ENSG00000155660.11	PDIA4	286.098	278.79	260.4	126.875	118.179	126.094	119.28	125.434	123.11
ENSG00000075292.19	ZNF638	227.279	231.142	234.399	203.353	217.105	224.883	201.08	220.143	213.953
ENSG00000148843.15	PDCD11	227.919	227.053	222.8	209.542	207.559	206.168	207.921	205.774	203.925
ENSG00000175166.17	PSMD2	231.631	224.895	217.812	205.73	195.682	195.571	191.71	194.532	199.078
ENSG00000139613.12	SMARCC2	205.389	206.267	217.812	237.393	235.925	243.898	247.815	235.104	229.68
ENSG00000198242.14	RPL23A	207.693	207.062	198.928	230.486	218.895	216.466	208.956	235.146	234.971
ENSG00000185950.9	IRS2	210.19	209.902	194.277	240.377	248.128	242.36	222.005	236.076	228.644
ENSG00000109133.13	TMEM33	235.727	224.27	224.873	201.972	214.122	204.801	204.817	194.659	198.412
ENSG00000177511.6	ST8SIA3	221.326	224.44	212.265	213.632	222.583	212.321	202.747	211.183	218.098
ENSG00000114503.11	NCBP2	213.262	210.583	223.976	221.092	215.424	217.235	216.199	219.72	218.949
ENSG00000166326.7	TRIM44	210.062	215.581	209.183	223.191	219.437	220.439	214.474	218.03	219.948
ENSG00000137337.15	MDC 1.00	217.55	211.776	221.735	217.002	223.884	227.874	232.812	213.719	204.665
ENSG00000136861.18	CDK5RAP2	210.958	211.832	203.299	230.209	228.82	241.932	236.893	225.51	231.715
ENSG00000168268.11	NT5DC2	225.167	224.667	214.338	208.437	198.231	194.289	193.435	200.407	199.929
ENSG00000110075.15	PPP6R3	214.67	213.309	208.062	229.215	223.613	229.284	227.293	228.807	222.242
ENSG00000118200.14	CAMSAP2	224.206	224.213	217.924	220.207	219.112	228.729	213.21	212.24	222.464
ENSG00000272325.2	NUDT3	210.382	208.539	218.653	236.288	224.915	215.996	214.359	220.65	234.675
ENSG00000185658.14	BRWD1	216.91	226.144	191.812	221.313	244.819	247.316	206.081	230.328	226.386
ENSG00000084090.14	STARD7	222.094	222.68	223.752	200.48	199.75	193.947	195.159	195.335	196.673
ENSG00000146918.20	NCAPG2	214.862	217.966	219.718	209.432	210.597	205.399	218.671	207.168	208.662
ENSG00000087086.15	FTL	204.749	210.526	198.48	230.154	210.434	211.765	228.328	227.581	225.35
ENSG00000115816.15	CEBPZ	229.327	231.369	226.722	200.756	205.715	216.594	182.628	215.494	216.803
ENSG00000100241.21	SBF1	229.007	232.107	219.942	195.617	194.977	191.384	187.457	192.377	191.788
ENSG00000130175.10	PRKCSH	199.053	201.44	198.592	242.477	239.179	239.753	255.978	240.386	241.373
ENSG00000156802.13	ATAD2	232.335	228.7	227.114	193.407	202.027	191.811	188.951	193.349	195.6
ENSG00000118263.15	KLF7	197.773	202.916	209.015	228.717	232.671	236.463	231.03	257.967	244
ENSG00000141425.18	RPRD1A	216.526	220.238	215.851	217.5	211.247	211.082	208.553	206.915	203.629
ENSG00000065427.15	KARS1	212.11	213.877	211.144	223.357	210.759	206.296	213.21	219.72	206.886
ENSG00000171456.20	ASXL1	200.973	200.304	200.385	237.835	243.843	235.907	237.18	239.71	241.558
ENSG00000005339.15	CREBBP	220.494	216.319	212.265	222.694	221.661	219.072	232.754	211.564	210.327
ENSG00000108018.15	SORCS1	225.231	221.317	222.8	198.159	205.01	203.69	195.907	200.829	203.518
ENSG00000078549.15	ADCYAP1R1	246.032	248.349	225.657	164.175	163.358	148.185	153.138	151.594	158.892
ENSG00000121579.13	NAA50	228.239	216.149	220.838	200.701	198.882	195.785	191.25	205.14	196.932
ENSG00000122026.10	RPL21	199.885	198.032	203.243	238.774	217.376	220.995	218.096	238.02	230.938
ENSG00000132182.12	NUP210	219.79	221.544	209.967	206.061	207.776	203.604	190.848	199.604	204.961
ENSG00000128585.18	MKLN1	215.054	209.561	199.657	220.428	225.891	228.088	204.874	223.482	226.645
ENSG00000198265.12	HELZ	200.461	201.326	189.178	248.334	244.06	252.743	235.111	231.976	240.818
ENSG00000197386.13	HTT	213.39	211.719	210.584	216.45	217.43	218.517	217.751	209.197	205.035
ENSG00000178295.15	GEN1	209.934	217.114	223.808	205.951	219.166	225.909	208.841	214.86	220.355
ENSG00000148396.18	SEC16A	228.623	224.043	217.14	194.346	196.875	192.666	193.607	189.799	182.648
ENSG00000196498.13	NCOR2	217.486	211.946	209.239	217.113	211.898	220.952	221.142	209.408	203.592
ENSG00000018189.13	RUFY3	216.334	214.218	213.161	214.35	212.007	205.912	204.587	205.351	210.845
ENSG00000156052.11	GNAQ	208.397	205.131	213.61	224.849	224.698	224.883	226.029	230.666	225.35
ENSG00000198825.15	INPP5F	225.167	214.729	213.554	206.061	196.007	196.298	190.158	200.998	198.338
ENSG00000130396.20	AFDN	204.749	204.79	206.661	233.138	226.65	241.633	232.237	221.833	227.015
ENSG00000108592.17	FTSJ3	219.918	217.966	214.226	212.361	201.051	209.8	210.508	209.958	204.517
ENSG00000120705.13	ETF1	220.43	215.126	215.011	200.259	197.797	195.443	193.78	197.533	200.817
ENSG00000168488.18	ATXN2L	212.814	215.524	225.265	197.606	206.041	197.75	208.783	197.702	194.823
ENSG00000204843.13	DCTN1	206.733	207.516	214.73	215.289	213.634	217.235	232.984	216.677	211.363
ENSG00000170921.15	TANC2	212.11	216.035	213.722	214.571	203.438	205.612	217.348	214.733	210.956
ENSG00000188976.11	NOC2L	222.926	218.136	216.972	199.983	201.919	192.153	190.561	194.912	194.194
ENSG00000204256.14	BRD2	207.885	208.482	211.873	209.653	218.135	213.475	224.994	209.873	215.359
ENSG00000064607.17	SUGP2	209.87	209.618	227.675	205.73	203.871	214.586	202.115	203.872	210.734
ENSG00000104112.9	SCG3	200.205	202.973	211.424	212.968	210.38	213.688	209.013	222.974	226.053
ENSG00000023734.11	STRAP	222.222	212.798	208.23	210.316	203.004	202.878	206.196	203.365	204.554
ENSG00000184007.22	PTP4A2	218.126	214.842	217.42	198.933	197.58	187.453	196.022	192.081	193.12
ENSG00000102226.10	USP11	209.037	201.61	199.545	227.004	220.251	213.304	211.198	227.835	219.578
ENSG00000177084.18	POLE	214.414	213.252	222.632	191.086	201.702	194.118	213.554	194.109	200.743
ENSG00000124214.21	STAU1	216.014	217.398	209.463	210.04	206.746	204.459	208.956	206.746	199.337
ENSG00000166250.12	CLMP	226.383	227.848	227.114	194.125	196.17	190.743	193.837	193.814	198.005
ENSG00000126012.12	KDM5C	212.43	206.267	206.549	218.494	215.749	206.253	211.887	210.888	211.067
ENSG00000182473.22	EXOC7	214.094	216.546	221.567	199.872	201.539	202.963	199.873	198.801	195.97
ENSG00000198900.7	TOP 1.00	211.534	213.479	222.8	216.616	214.23	212.406	209.243	197.871	201.224
ENSG00000116001.17	TIA1	201.549	196.953	220.334	207.222	223.125	222.875	197.804	211.014	218.838
ENSG00000109111.15	SUPT6H	207.437	203.938	209.071	224.96	213.742	219.286	219.303	214.902	208.292
ENSG00000086598.11	TMED2	228.047	222.623	220.278	187.715	177.242	179.761	188.089	178.726	180.761
ENSG00000146463.12	ZMYM4	204.173	210.81	210.584	214.184	216.183	216.209	201.195	213.465	207.367
ENSG00000136108.15	CKAP2	205.581	208.198	204.308	217.887	230.935	237.061	223.499	233.286	235.785
ENSG00000140526.18	ABHD2	218.894	215.013	199.208	202.746	205.119	193.221	191.538	196.011	194.823
ENSG00000134369.15	NAV1	216.846	219.67	207.334	208.106	215.152	206.51	204.472	196.223	200.669
ENSG00000106244.13	PDAP1	210.958	208.368	209.071	213.079	208.807	205.1	217.291	199.435	205.739
ENSG00000154358.23	OBSCN	176.587	186.049	225.77	232.972	241.728	263.382	263.508	234.85	226.941
ENSG00000171603.18	CLSTN1	207.373	200.588	197.023	221.368	211.898	212.919	209.645	220.988	217.358
ENSG00000187479.8	C11orf96	227.023	231.142	200.273	175.503	187.113	160.021	165.727	175.303	179.133
ENSG00000163960.12	UBXN7	207.309	203.711	206.941	222.031	230.176	224.029	210.565	207.887	221.761
ENSG00000030066.13	NUP160	205.645	202.064	204.644	210.095	208.97	208.176	206.714	205.393	208.07
ENSG00000053254.16	FOXN3	193.036	192.012	189.514	236.288	232.399	235.138	248.562	235.949	232.936
ENSG00000106723.17	SPIN1	201.933	205.301	202.515	208.603	205.932	200.912	213.727	206.07	211.881
ENSG00000138018.18	SELENOI	226.895	221.601	218.541	183.847	190.692	189.76	167.222	174.627	177.061
ENSG00000141568.21	FOXK2	215.31	215.751	211.929	202.635	196.17	191.939	202.058	192.292	191.455
ENSG00000188994.13	ZNF292	183.628	192.523	188.057	218.936	247.694	269.151	250.287	274.788	261.244
ENSG00000130477.15	UNC13A	216.59	214.956	225.657	196.667	194.434	197.964	196.769	182.572	185.72
ENSG00000149485.19	FADS1	189.644	187.412	198.872	231.038	225.945	229.37	221.257	236.921	230.013
ENSG00000182836.10	PLCXD3	176.075	173.839	175.561	257.342	263.639	279.277	245.631	276.52	258.616
ENSG00000135837.16	CEP350	213.71	214.275	185.536	202.469	224.156	225.482	201.943	215.832	213.768
ENSG00000100811.14	YY1	206.477	212.684	209.967	197.275	202.895	199.331	193.78	205.563	196.858
ENSG00000149311.19	ATM	200.909	201.212	192.708	223.578	226.976	237.574	202.805	223.989	225.461
ENSG00000151208.17	DLG5	218.062	211.889	209.631	191.97	198.556	185.872	199.011	188.742	189.087
ENSG00000118705.17	RPN2	211.278	218.08	205.989	183.736	182.015	168.737	172.913	182.572	186.719
ENSG00000139970.17	RTN1	192.908	195.363	192.876	217.168	208.97	210.996	203.092	227.454	226.608
ENSG00000143815.15	LBR	196.365	190.763	188.786	223.081	227.247	218.859	222.924	215.79	221.021
ENSG00000171914.16	TLN2	215.182	211.662	206.269	205.564	196.387	190.785	186.422	199.73	195.193
ENSG00000095015.6	MAP3K1	190.156	190.308	187.329	218.992	223.342	220.696	230.11	233.54	228.422
ENSG00000131236.18	CAP1	221.71	215.467	206.997	188.986	187.764	179.847	187.169	183.967	190.9
ENSG00000152558.15	TMEM123	198.669	200.02	203.915	221.92	213.092	220.91	212.635	216.677	215.581
ENSG00000066044.15	ELAVL1	225.103	213.195	202.01	198.325	199.587	181.428	189.756	189.038	187.792
ENSG00000188612.12	SUMO2	197.837	195.193	196.295	208.216	209.132	205.954	214.014	205.816	214.841
ENSG00000087087.20	SRRT	222.606	218.704	234.063	174.784	177.621	178.65	188.146	169.133	177.098
ENSG00000146676.10	PURB	207.117	206.835	207.053	208.271	204.902	205.271	194.642	192.63	201.557
ENSG00000197965.12	MPZL1	218.382	220.465	210.135	197.551	184.943	180.659	183.95	180.205	185.239
ENSG00000129003.19	VPS13C	193.292	191.671	157.966	219.379	239.667	249.495	210.853	233.963	229.754
ENSG00000115365.12	LANCL1	197.325	198.77	193.661	215.234	209.892	210.355	198.551	208.774	212.103
ENSG00000142599.19	RERE	205.133	198.146	207.782	200.48	207.071	199.63	215.221	201.801	208.514
ENSG00000173894.11	CBX2	212.494	207.346	200.833	192.467	192.59	187.196	195.159	194.321	198.079
ENSG00000067704.10	IARS2	208.781	208.539	196.295	202.027	201.268	197.537	196.194	193.264	203.74
ENSG00000142208.17	AKT1	214.478	205.756	200.946	188.655	182.611	183.137	185.617	182.487	182.093
ENSG00000003096.14	KLHL13	198.477	199.963	199.264	208.05	203.871	204.63	190.273	205.351	207.959
ENSG00000138674.17	SEC31A	206.925	208.255	202.122	203.353	206.095	190.999	196.769	204.929	196.118
ENSG00000154174.8	TOMM70	204.685	206.494	204.644	202.525	206.854	196.212	195.274	202.182	196.118
ENSG00000135018.14	UBQLN1	208.845	201.837	210.135	192.246	192.645	183.735	190.388	191.024	187.644
ENSG00000114739.14	ACVR2B	182.476	182.017	188.001	213.3	217.376	214.329	251.437	218.537	218.653
ENSG00000110395.7	CBL	203.149	206.608	193.437	220.539	218.949	204.715	185.387	197.955	199.744
ENSG00000122779.18	TRIM24	208.717	196.442	201.842	208.05	213.471	204.032	211.198	206.83	206.738
ENSG00000154319.16	FAM167A	241.488	229.324	208.286	161.025	155.765	147.544	161.186	140.733	163.296
ENSG00000234741.8	GAS5	184.716	192.921	202.683	192.578	187.33	183.735	202.517	212.282	211.141
ENSG00000158321.18	AUTS2	190.156	196.044	202.29	213.466	211.247	213.304	221.142	224.031	212.843
ENSG00000171490.13	RSL1D1	200.205	196.84	194.838	216.781	210.597	209.8	211.6	215.917	207.626
ENSG00000153201.16	RANBP2	205.709	206.721	204.028	182.134	199.261	208.304	184.007	206.746	204.554
ENSG00000161202.20	DVL3	204.685	203.882	212.545	203.574	199.261	200.442	195.274	200.745	199.337
ENSG00000163320.12	CGGBP1	207.821	206.494	210.584	187.328	193.187	184.077	180.673	188.489	187.94
ENSG00000106344.8	RBM28	193.804	200.701	197.023	199.485	207.505	204.758	212.232	201.167	203.444
ENSG00000116641.18	DOCK7	193.228	200.304	186.824	214.847	219.437	215.013	210.163	215.452	214.138
ENSG00000166847.10	DCTN5	204.941	200.701	198.536	198.435	196.495	196.511	179.294	198.04	197.783
ENSG00000104852.15	SNRNP70	205.581	205.131	216.804	176.829	183.262	185.487	197.459	179.191	180.835
ENSG00000163104.18	SMARCAD1	198.157	200.02	205.709	198.767	205.607	208.433	189.928	208.436	206.405
ENSG00000153956.16	CACNA2D1	173.643	179.575	180.044	219.6	236.087	248.555	234.364	245.247	233.824
ENSG00000084623.12	EIF3I	195.789	186.049	184.079	217.666	205.499	198.904	196.022	207.126	207.996
ENSG00000056586.16	RC3H2	203.533	203.541	196.014	203.353	212.82	196.212	188.376	193.814	202.482
ENSG00000164190.19	NIPBL	204.109	202.973	190.691	195.507	217.43	232.959	207.921	224.876	215.174
ENSG00000247556.6	OIP5-AS1	203.277	203.598	203.579	191.86	196.712	192.153	185.445	180.163	181.39
ENSG00000185787.15	MORF4L1	200.269	201.667	195.79	188.323	189.879	183.607	195.734	187.474	193.971
ENSG00000080644.16	CHRNA3	232.591	230.006	208.566	154.173	150.775	144.083	136.87	148.467	146.237
ENSG00000163655.16	GMPS	211.278	205.983	196.575	195.341	189.987	186.342	179.236	184.601	191.862
ENSG00000135821.19	GLUL	187.852	192.637	176.458	213.521	209.512	209.501	211.37	210.423	212.991
ENSG00000055118.16	KCNH2	234.191	221.771	201.674	164.285	165.635	151.56	157.22	158.356	161.187
ENSG00000138081.21	FBXO11	185.356	190.82	188.113	223.855	216.942	226.122	223.154	209.155	211.215
ENSG00000089220.5	PEBP1	200.653	195.363	196.799	192.744	188.035	186.812	188.204	193.095	193.009
ENSG00000147162.14	OGT	184.78	182.926	181.109	205.232	211.953	224.755	204.702	219.382	214.878
ENSG00000130024.15	PHF10	206.605	200.133	204.028	197.606	195.573	197.665	186.652	190.898	188.162
ENSG00000143157.12	POGK	209.806	204.961	204.364	189.207	185.323	182.24	179.869	187.305	182.352
ENSG00000124571.18	XPO5	209.165	211.889	206.661	182.631	180.876	172.113	165.555	172.598	176.136
ENSG00000182979.18	MTA1	188.172	193.432	197.695	201.419	199.912	201.596	215.221	206.746	201.631
ENSG00000270647.6	TAF15	187.276	187.98	199.657	217.776	207.939	213.517	219.303	214.099	207.404
ENSG00000125484.12	GTF3C4	198.925	199.679	189.066	197.883	197.689	196.896	182.628	194.279	190.752
ENSG00000141424.13	SLC39A6	193.484	183.494	198.536	206.116	202.624	204.801	200.333	210.507	207.293
ENSG00000071626.17	DAZAP1	199.629	206.664	206.437	190.699	191.235	186.256	194.297	186.037	186.386
ENSG00000074696.13	HACD3	202.253	199.566	200.049	187.328	178.977	176.471	183.433	175.387	181.871
ENSG00000124177.16	CHD6	189.068	183.777	184.023	218.936	209.566	223.388	216.831	221.622	208.625
ENSG00000106976.21	DNM1	196.109	200.872	205.372	199.485	192.753	197.836	192.63	191.278	193.157
ENSG00000014824.14	SLC30A9	191.052	195.079	195.454	201.64	209.132	205.228	203.092	205.647	205.998
ENSG00000126457.22	PRMT1	203.405	195.817	192.988	197.054	193.35	182.667	202.058	194.786	198.523
ENSG00000105576.15	TNPO2	195.469	188.378	198.872	196.501	195.736	194.332	192.228	195.039	195.415
ENSG00000172795.17	DCP2	193.997	199.338	198.704	201.64	206.041	196.169	191.308	186.418	189.05
ENSG00000066735.14	KIF26A	234.575	231.142	203.635	140.8	148.334	131.007	128.937	135.746	139.059
ENSG00000198791.12	CNOT7	193.1	191.501	193.157	201.364	201.919	198.391	194.987	201.928	202.001
ENSG00000114416.18	FXR1	190.412	188.718	197.92	204.514	214.068	215.312	208.611	215.579	213.324
ENSG00000084774.14	CAD	221.39	220.408	214.506	158.151	166.069	158.012	154.518	153.918	154.674
ENSG00000100650.16	SRSF5	172.363	180.597	204.924	199.596	201.485	219.371	231.317	224.327	229.976
ENSG00000070614.15	NDST1	200.077	201.212	188.337	193.13	199.099	183.735	190.848	192.757	191.381
ENSG00000116127.19	ALMS1	187.852	195.079	171.583	214.295	227.572	219.927	205.277	219.593	218.727
ENSG00000065000.19	AP3D1	204.749	205.983	206.381	184.455	179.628	180.06	188.779	182.192	181.723
ENSG00000118922.17	KLF12	178.059	188.207	174.945	224.518	231.098	229.626	212.405	226.905	228.348
ENSG00000101191.17	DIDO1	197.709	196.726	198.872	199.043	192.048	188.692	194.757	186.925	182.389
ENSG00000133872.14	SARAF	192.972	190.479	185.368	206.779	194.923	193.477	192.63	211.31	210.549
ENSG00000116667.15	C1orf21	200.141	198.032	188.73	201.254	193.296	181.641	191.883	197.448	192.75
ENSG00000137812.20	KNL1	191.5	190.365	187.105	203.298	222.745	222.234	199.528	204.675	213.768
ENSG00000130382.9	MLLT1	224.014	223.361	212.041	158.428	161.242	146.646	156.76	149.523	158.559
ENSG00000106636.9	YKT6	206.605	202.235	196.519	176.498	172.361	173.437	183.49	179.867	179.688
ENSG00000005022.6	SLC25A5	190.348	192.807	187.553	189.207	185.974	179.719	173.2	190.306	190.974
ENSG00000157657.14	ZNF618	197.709	186.276	190.859	203.519	207.343	195.315	202.805	197.786	195.119
ENSG00000166206.15	GABRB3	196.941	197.123	189.794	194.346	188.631	190.187	183.145	189.672	193.416
ENSG00000087191.13	PSMC5	193.164	191.842	200.777	196.28	181.364	180.83	188.951	186.037	185.609
ENSG00000075151.22	EIF4G3	193.484	198.203	204.42	196.999	198.611	198.178	208.036	195.462	194.49
ENSG00000100697.15	DICER1	203.277	204.847	196.575	186.057	189.065	189.546	165.67	189.376	183.611
ENSG00000142657.21	PGD	187.916	183.55	193.044	202.911	196.55	189.461	199.931	197.955	194.416
ENSG00000178952.11	TUFM	185.932	191.728	186.208	197.385	198.502	196.468	199.586	199.984	195.193
ENSG00000124406.16	ATP8A1	178.636	174.634	179.26	228.552	221.715	229.754	204.184	217.734	226.016
ENSG00000182985.18	CADM1	165.003	175.997	177.803	236.012	232.399	244.838	230.8	248.205	232.085
ENSG00000126773.13	PCNX4	186.252	189.513	184.807	195.286	201.594	210.099	200.333	200.195	205.035
ENSG00000147649.10	MTDH	196.173	196.84	191.363	187.549	186.353	182.881	177.914	181.262	179.54
ENSG00000115738.10	ID2	212.622	215.467	196.239	153.841	156.524	139.126	166.705	137.69	157.967
ENSG00000085733.16	CTTN	196.685	193.034	194.894	180.697	183.967	182.881	191.021	178.557	185.35
ENSG00000112739.17	PRPF4B	196.237	201.042	208.679	181.692	183.045	193.563	174.293	186.376	194.675
ENSG00000125686.12	MED1	203.021	193.659	190.467	193.241	189.011	183.65	189.526	185.319	182.833
ENSG00000095319.14	NUP188	207.309	203.03	197.191	173.679	168.944	162.285	164.635	166.343	167.07
ENSG00000153914.16	SREK1	192.268	186.106	191.98	193.517	209.241	218.346	190.733	201.04	202.519
ENSG00000159377.11	PSMB4	192.076	193.546	177.578	188.876	180.062	176.172	179.581	183.502	183.204
ENSG00000163466.16	ARPC2	193.612	197.464	195.79	186.168	180.442	186.641	186.364	187.263	184.388
ENSG00000113161.17	HMGCR	184.204	178.382	190.635	190.754	188.414	179.42	172.683	187.728	192.787
ENSG00000183092.16	BEGAIN	161.29	166.74	180.604	241.427	247.802	262.741	230.972	262.151	240.004
ENSG00000103657.14	HERC1	199.437	191.501	172.367	190.865	191.072	195.657	186.192	177.67	185.276
ENSG00000129657.16	SEC14L1	202.893	197.067	186.264	184.013	182.015	180.146	172.223	176.402	175.951
ENSG00000139218.18	SCAF11	190.22	197.351	196.631	183.239	204.685	204.672	183.548	193.814	192.343
ENSG00000101367.9	MAPRE1	188.812	193.318	190.411	180.31	193.079	182.368	187.629	189.757	190.012
ENSG00000177889.10	UBE2N	195.725	197.123	194.053	177.934	173.337	169.934	176.937	176.867	175.84
ENSG00000110107.9	PRPF19	198.733	199.452	192.484	167.656	174.693	162.542	168.429	169.682	171.695
ENSG00000188322.8	SBK1	194.509	189.57	181.445	191.031	191.723	188.863	186.997	189.334	188.865
ENSG00000105568.18	PPP2R1A	205.197	197.578	179.652	177.105	176.862	166.131	169.406	177.416	183.389
ENSG00000090905.19	TNRC6A	188.94	189.968	199.713	188.765	201.485	199.075	198.436	190.855	194.12
ENSG00000188647.13	PTAR1	192.78	191.104	184.863	195.672	206.909	206.51	172.338	186.84	187.681
ENSG00000143850.16	PLEKHA6	227.727	230.744	214.338	154.946	158.91	152.628	154.231	141.789	150.863
ENSG00000167635.12	ZNF146	192.46	193.489	200.777	185.284	197.038	205.313	183.892	197.871	196.451
ENSG00000082701.17	GSK3B	182.028	187.526	177.13	195.893	201.756	195.614	200.85	207.422	198.449
ENSG00000157985.19	AGAP1	192.524	194.511	189.29	194.954	191.56	193.606	199.413	201.463	187.2
ENSG00000113407.14	TARS1	201.101	204.62	193.157	174.563	170.734	172.54	174.81	174.289	170.696
ENSG00000163399.16	ATP1A1	200.333	193.148	182.061	192.688	184.672	174.762	166.36	183.671	180.428
ENSG00000162607.13	USP1	195.149	191.842	192.316	183.405	184.401	181.342	171.361	188.066	191.899
ENSG00000185591.10	SP1	178.7	186.39	176.514	191.97	192.645	189.845	204.644	191.236	191.048
ENSG00000166986.15	MARS1	199.885	205.472	200.553	159.533	151.371	150.791	147.677	154.679	159.114
ENSG00000104529.17	EEF1D	180.748	182.982	184.863	201.64	196.55	190.273	197.286	201.083	199.263
ENSG00000198408.14	OGA	153.162	165.036	173.04	221.036	228.169	229.242	237.468	242.161	240.966
ENSG00000127946.17	HIP1	206.221	199.282	199.881	170.253	172.957	172.027	168.199	167.484	165.183
ENSG00000062485.19	CS	191.436	196.215	188.954	185.284	182.557	178.309	178.374	181.22	181.02
ENSG00000136854.24	STXBP1	186.124	186.731	184.527	193.573	199.316	198.477	194.125	189.376	185.461
ENSG00000102606.18	ARHGEF7	182.604	186.276	181.053	197.385	196.278	200.741	201.195	195.42	194.712
ENSG00000196419.13	XRCC6	194.061	192.239	191.812	180.2	170.842	167.84	175.27	178.05	177.172
ENSG00000109265.14	CRACD	166.347	167.308	166.539	223.523	222.908	220.867	232.812	220.439	216.84
ENSG00000078618.22	NRDC	178.7	182.131	189.066	194.899	192.319	191.726	189.871	191.616	198.116
ENSG00000224078.15	SNHG14	193.228	194.568	177.13	173.9	191.614	190.23	182.57	183.037	179.022
ENSG00000183684.8	ALYREF	214.67	204.961	194.053	160.196	163.249	151.047	161.646	151.805	151.455
ENSG00000112697.17	TMEM30A	187.66	183.437	194.221	189.815	193.079	184.504	180.903	190.39	187.089
ENSG00000182054.10	IDH2	193.228	191.615	175.897	182.963	187.058	174.42	179.064	192.292	184.24
ENSG00000124789.12	NUP153	199.181	191.047	195.006	179.26	183.262	173.395	171.533	168.879	169.031
ENSG00000177463.15	NR2C2	183.244	174.407	181.725	197.551	198.611	201.254	191.825	193.645	198.042
ENSG00000084733.11	RAB10	188.236	193.432	185.424	177.824	185.594	181.641	177.454	172.852	173.953
ENSG00000083642.19	PDS5B	189.452	185.992	189.458	195.009	200.834	202.109	193.895	202.435	194.971
ENSG00000141556.21	TBCD	184.204	187.412	179.596	185.394	181.364	186	179.869	187.643	185.091
ENSG00000169375.16	SIN3A	188.172	184.345	182.51	200.812	196.984	199.118	202.977	191.827	188.125
ENSG00000044115.21	CTNNA1	179.148	176.054	178.923	201.475	192.482	188.179	198.264	202.055	193.934
ENSG00000189159.16	JPT1	181.388	174.066	173.6	209.819	207.343	200.442	197.344	202.182	202.482
ENSG00000174371.17	EXO1	203.917	197.351	201.282	161.743	158.856	162.627	163.543	156.877	161.705
ENSG00000104722.14	NEFM	190.412	183.721	195.174	172.574	172.686	175.018	184.295	167.273	168.291
ENSG00000244754.9	N4BP2L2	183.372	183.948	190.915	189.815	199.37	209.287	201.138	189.714	190.826
ENSG00000108561.8	C1QBP	193.676	185.14	189.906	183.957	172.74	172.925	181.651	175.514	172.14
ENSG00000114062.22	UBE3A	188.684	189.457	183.238	187.936	192.319	184.12	185.33	191.236	190.197
ENSG00000145734.19	BDP1	196.301	191.501	179.652	179.15	187.113	206.467	189.526	192.334	190.9
ENSG00000131374.14	TBC1D5	158.858	155.609	165.643	223.191	218.352	222.832	220.74	224.961	220.984
ENSG00000159842.15	ABR	190.028	196.385	181.221	188.82	183.37	183.351	180.558	189.63	183.574
ENSG00000159131.17	GART	193.997	197.805	194.894	180.366	172.578	171.386	175.27	177.078	174.878
ENSG00000004534.15	RBM6	169.163	173.725	203.803	194.457	190.15	211.082	208.036	192.673	192.01
ENSG00000169925.17	BRD3	190.028	179.064	187.665	192.191	191.506	186.256	185.445	190.095	180.428
ENSG00000140575.13	IQGAP1	193.42	186.674	188.786	189.097	183.967	189.119	177.627	179.106	182.759
ENSG00000087470.19	DNM1L	182.86	186.844	190.523	189.649	185.703	186.812	182.685	180.543	186.386
ENSG00000105983.22	LMBR1	182.156	185.027	180.268	190.312	188.035	184.376	182.973	185.826	182.426
ENSG00000075340.23	ADD2	171.403	179.575	173.712	203.574	209.675	202.408	193.435	207.676	194.934
ENSG00000138078.16	PREPL	175.115	178.78	180.492	201.861	201.322	201.938	184.927	198.801	198.264
ENSG00000114999.8	TTL	189.58	188.548	190.131	170.364	171.981	175.574	186.077	170.443	166.515
ENSG00000089169.15	RPH3A	185.484	181.051	189.29	183.018	191.289	186.043	193.492	178.388	184.425
ENSG00000105401.9	CDC37	184.908	186.958	193.997	165.611	173.011	180.189	181.133	178.811	174.397
ENSG00000107937.19	GTPBP4	189.516	190.081	188.281	177.326	173.933	176.514	187.169	177.458	179.244
ENSG00000099995.19	SF3A1	192.012	195.533	189.458	171.082	164.442	171.557	171.763	165.794	168.661
ENSG00000166794.6	PPIB	208.397	211.037	194.501	140.579	131.575	133.528	140.089	135.872	134.914
ENSG00000163931.16	TKT	180.364	181.96	174.889	187.218	186.408	177.112	184.467	186.798	182.5
ENSG00000108312.15	UBTF	209.55	212.628	201.786	145.884	147.792	138.442	152.793	145.424	147.236
ENSG00000128951.14	DUT	196.877	196.783	185.76	157.599	157.609	150.919	158.025	160.131	158.3
ENSG00000163946.13	TASOR	179.276	178.042	186.6	196.004	195.79	198.819	181.938	183.417	190.493
ENSG00000197006.14	METTL9	179.724	179.972	180.1	186.057	180.604	178.992	185.502	183.417	182.796
ENSG00000198752.11	CDC42BPB	193.1	191.785	192.708	179.316	175.072	174.976	168.947	173.908	167.773
ENSG00000106153.13	CHCHD2	178.828	177.246	174.16	187.218	176.374	165.917	163.658	186.206	184.129
ENSG00000130227.17	XPO7	185.932	183.721	180.324	190.312	192.428	187.752	185.1	185.826	183.87
ENSG00000244462.8	RBM12	175.947	176.451	167.604	194.457	195.465	190.956	195.619	200.195	200.817
ENSG00000090863.12	GLG1	171.147	172.362	167.156	198.546	201.214	203.561	198.953	198.632	202.408
ENSG00000110696.10	C11orf58	179.852	181.051	182.342	185.947	183.75	178.736	191.021	184.854	188.236
ENSG00000167178.16	ISLR2	216.334	216.205	180.268	133.23	143.128	127.931	132.214	136.591	135.321
ENSG00000180357.9	ZNF609	180.684	178.042	182.173	186.555	192.862	194.631	206.944	186.545	186.793
ENSG00000146223.16	RPL7L1	178.251	188.945	195.23	183.239	175.398	172.027	167.452	177.036	180.539
ENSG00000149100.13	EIF3M	175.755	177.19	177.522	188.433	192.319	189.931	189.986	194.912	193.971
ENSG00000172053.18	QARS1	167.499	169.352	170.182	197.109	189.336	191.811	196.654	201.886	195.6
ENSG00000181555.21	SETD2	173.771	171.567	173.712	199.043	202.027	205.698	188.319	192.63	186.867
ENSG00000066117.15	SMARCD1	177.099	175.486	175.561	184.4	189.499	184.632	197.286	190.559	195.452
ENSG00000077235.18	GTF3C1	185.356	188.775	191.98	177.713	180.333	174.378	181.248	172.852	167.995
ENSG00000118965.16	WDR35	175.179	175.94	179.82	193.738	203.438	202.28	194.355	194.194	200.484
ENSG00000099204.20	ABLIM1	177.419	170.772	174.44	204.072	198.285	200.912	181.018	197.237	197.672
ENSG00000001629.10	ANKIB1	178.315	181.165	184.415	190.533	192.862	195.058	176.822	179.994	186.016
ENSG00000077232.19	DNAJC10	194.701	193.773	185.928	161.799	165.852	161.345	157.22	171.457	168.143
ENSG00000142949.17	PTPRF	177.035	182.585	180.156	190.478	190.041	187.495	183.835	191.87	178.763
ENSG00000184863.11	RBM33	167.371	169.068	174.777	198.049	201.322	204.032	214.359	203.957	208.107
ENSG00000130638.17	ATXN10	193.612	185.197	179.596	179.647	175.127	158.269	156.415	169.217	173.102
ENSG00000117906.14	RCN2	186.38	186.049	187.945	170.198	175.018	171.045	181.018	176.19	177.616
ENSG00000109805.10	NCAPG	174.411	172.078	179.035	196.391	201.105	202.963	178.949	191.278	200.114
ENSG00000068878.15	PSME4	171.531	165.32	170.798	194.788	203.655	199.502	206.369	202.351	201.557
ENSG00000119203.14	CPSF3	179.084	178.553	172.143	186.168	186.353	189.546	191.883	191.701	191.344
ENSG00000161203.13	AP2M1	183.564	180.029	177.522	185.339	172.469	173.779	173.545	177.67	184.684
ENSG00000168175.15	MAPK1IP1L	176.971	181.506	186.88	181.416	185.703	183.436	200.735	178.388	178.245
ENSG00000155189.12	AGPAT5	182.668	189.343	184.415	171.911	174.747	172.839	162.336	168.499	176.025
ENSG00000258441.1	LINC00641	195.725	194.227	194.557	170.198	166.991	163.952	161.933	161.272	163.37
ENSG00000076108.12	BAZ2A	172.171	166.229	180.941	205.619	199.261	210.996	202.46	192.715	182.685
ENSG00000065135.12	GNAI3	186.316	176.622	177.354	184.952	181.743	170.959	167.452	180.712	181.649
ENSG00000111897.7	SERINC1	163.147	163.673	170.294	208.603	201.648	203.69	196.252	208.31	204.924
ENSG00000169258.7	GPRIN1	187.532	181.449	171.751	175.558	172.523	166.088	169.981	181.051	178.985
ENSG00000197343.11	ZNF655	173.899	178.325	187.049	188.986	193.187	201.468	170.499	179.74	182.167
ENSG00000169567.13	HINT1	175.627	175.259	163.457	183.957	170.842	165.276	173.143	182.572	182.685
ENSG00000096063.16	SRPK1	181.964	183.096	182.678	176.498	180.496	167.242	177.857	172.471	174.989
ENSG00000136068.15	FLNB	172.363	171.454	173.768	195.507	190.855	191.384	186.364	193.053	186.386
ENSG00000135862.6	LAMC1	175.691	181.733	176.29	185.284	181.635	177.069	173.2	180.966	172.325
ENSG00000198836.11	OPA1	179.916	180.597	174.496	185.339	194.055	185.701	172.683	187.432	191.603
ENSG00000181827.15	RFX7	189.58	179.916	179.596	181.747	183.099	183.18	180.961	177.162	180.983
ENSG00000198677.12	TTC37	180.108	189.286	179.876	167.324	183.425	190.444	175.27	189.249	190.419
ENSG00000255302.5	EID1	179.724	179.121	172.927	171.358	180.387	179.291	175.385	182.065	183.685
ENSG00000114120.14	SLC25A36	165.131	173.498	172.535	196.336	211.193	210.099	183.95	204.21	203.74
ENSG00000081026.19	MAGI3	183.436	175.259	178.587	183.571	187.655	189.034	178.431	185.573	179.947
ENSG00000065911.13	MTHFD2	201.805	202.973	187.889	136.545	142.585	134.511	135.778	137.013	139.244
ENSG00000139697.14	SBNO1	185.228	180.2	189.29	191.086	185.214	178.779	164.29	178.177	176.173
ENSG00000103540.16	CCP110	184.14	187.639	193.829	169.259	176.808	177.027	164.463	174.458	178.171
ENSG00000072071.16	ADGRL1	198.477	190.763	191.307	154.725	154.083	153.782	160.094	149.481	153.009
ENSG00000078699.22	CBFA2T2	188.492	177.758	181.109	178.1	171.71	173.096	169.866	178.177	171.51
ENSG00000142230.13	SAE1	196.877	187.355	180.436	163.622	160.483	150.022	163.601	157.68	157.782
ENSG00000012048.23	BRCA1	195.661	199.622	191.251	153.565	164.225	166.302	153.943	151.087	156.635
ENSG00000134644.16	PUM1	171.083	176.565	175.169	192.246	192.699	186.641	180.271	177.712	180.687
ENSG00000008710.20	PKD1	175.691	172.078	184.359	164.396	169.432	180.402	169.866	181.642	183.537
ENSG00000198961.10	PJA2	188.876	178.723	178.139	170.972	175.344	177.155	166.245	169.217	173.953
ENSG00000121068.14	TBX2	202.509	195.42	190.019	141.463	150.341	142.288	145.148	134.562	147.939
ENSG00000157741.15	UBN2	180.364	181.165	173.824	194.954	196.224	201.681	169.464	174.923	171.621
ENSG00000162704.16	ARPC5	192.844	190.536	184.135	155.278	152.944	152.842	155.955	152.397	156.376
ENSG00000177885.15	GRB2	184.46	183.777	173.992	175.834	173.337	172.156	171.246	170.654	169.882
ENSG00000063245.15	EPN1	184.012	179.461	174.665	174.232	169.106	167.028	168.544	172.133	165.775
ENSG00000160691.19	SHC1	192.588	187.81	188.506	151.686	158.259	151.304	152.334	160.511	152.269
ENSG00000074657.14	ZNF532	177.867	170.715	181.109	176.719	175.561	176.514	184.295	182.53	181.797
ENSG00000182963.11	GJC1	174.091	171.908	172.647	186.278	181.798	178.821	186.709	175.514	175.248
ENSG00000143418.20	CERS2	180.364	182.414	172.367	171.027	170.137	160.661	165.268	169.217	173.028
ENSG00000085662.14	AKR1B1	175.435	177.587	163.177	183.957	174.747	162.627	164.463	181.515	183.463
ENSG00000152332.16	UHMK1	182.348	178.553	171.919	166.827	169.649	169.592	164.578	165.033	166.922
ENSG00000225783.8	MIAT	153.93	159.244	167.436	207.332	207.559	228.943	205.392	212.24	216.248
ENSG00000183530.14	PRR14L	179.66	180.768	176.346	187.439	186.733	180.83	167.739	176.402	179.503
ENSG00000198646.14	NCOA6	176.395	179.121	177.074	181.526	180.984	176.172	185.674	164.442	170.992
ENSG00000023516.9	AKAP11	181.516	183.721	175.729	166.661	184.021	179.761	163.888	174.838	171.547
ENSG00000004897.12	CDC27	174.219	175.486	173.992	192.412	191.397	184.291	181.823	178.557	189.198
ENSG00000113282.14	CLINT1	177.355	172.646	175.001	178.542	177.784	178.736	178.546	175.345	177.135
ENSG00000206053.13	JPT2	187.212	187.81	185.368	161.799	158.585	149.894	152.736	153.58	156.783
ENSG00000117592.9	PRDX6	176.907	179.688	172.143	170.087	165.635	162.371	158.944	171.542	174.73
ENSG00000158417.11	EIF5B	188.428	190.195	203.131	141.519	157.012	176.642	152.621	179.445	167.218
ENSG00000138385.16	SSB	187.916	183.55	192.54	158.262	159.073	169.805	160.036	171.077	166.293
ENSG00000083168.11	KAT6A	179.852	176.167	172.984	182.631	180.984	183.735	177.972	174.627	172.732
ENSG00000151503.13	NCAPD3	185.868	175.77	178.195	164.285	164.334	157.756	160.151	161.61	164.776
ENSG00000134779.15	TPGS2	177.931	173.101	166.427	179.537	176.808	169.122	175.845	177.923	175.581
ENSG00000103275.21	UBE2I	174.731	175.429	171.919	171.193	172.957	166.644	174.12	171.753	174.138
ENSG00000078140.14	UBE2K	182.284	178.382	182.342	171.911	166.178	168.011	165.9	162.667	170.548
ENSG00000175387.16	SMAD2	171.403	169.012	166.371	170.253	175.994	180.018	208.783	182.741	180.428
ENSG00000107186.17	MPDZ	167.307	166.286	169.005	188.765	188.143	200.656	184.697	185.657	186.645
ENSG00000167615.17	LENG8	158.218	163.446	210.64	166.44	176.971	198.477	181.421	179.909	194.231
ENSG00000100095.19	SEZ6L	187.596	181.222	177.41	172.74	170.625	158.183	162.566	160.173	162.778
ENSG00000122786.20	CALD1	165.387	164.071	168.333	193.186	193.892	200.314	192.055	192.419	192.824
ENSG00000013810.20	TACC3	174.731	171.17	171.078	183.681	188.143	183.436	187.227	183.375	185.091
ENSG00000166833.22	NAV2	211.214	213.082	197.583	136.379	143.29	126.82	140.549	124.927	131.214
ENSG00000056487.16	PHF21B	172.939	172.078	174.272	176.387	179.465	174.933	185.445	179.825	177.431
ENSG00000254087.8	LYN	168.715	163.162	168.333	187.218	173.337	173.95	179.524	174.289	180.983
ENSG00000101361.17	NOP56	180.428	178.666	185.48	151.52	151.968	154.765	158.944	151.932	163.37
ENSG00000068654.16	POLR1A	196.813	185.879	178.475	159.478	163.086	154.423	156.472	156.327	158.411
ENSG00000065809.14	FAM107B	155.146	158.903	163.009	193.075	191.018	187.794	194.067	187.601	192.824
ENSG00000012660.14	ELOVL5	183.116	178.098	177.074	167.822	162.652	157.628	151.126	152.735	161.224
ENSG00000081154.12	PCNP	178.379	173.498	177.466	178.708	176.211	174.207	172.683	175.599	171.769
ENSG00000139496.16	NUP58	184.78	180.086	184.415	163.898	163.737	167.071	165.555	161.821	163.222
ENSG00000196782.12	MAML3	155.722	154.643	156.061	202.193	199.153	204.502	216.946	206.535	200.632
ENSG00000131467.11	PSME3	191.372	186.163	182.958	154.118	148.009	143.313	151.126	149.777	148.827
ENSG00000169398.19	PTK2	173.707	172.022	174.16	181.471	176.971	168.353	183.778	176.613	176.913
ENSG00000146433.9	TMEM181	184.524	177.758	182.51	172.022	170.083	173.651	158.657	164.146	170.955
ENSG00000183856.11	IQGAP3	160.586	155.893	164.41	190.533	190.584	189.589	197.171	186.545	195.674
ENSG00000152767.17	FARP1	169.867	176.849	158.47	179.813	178.815	178.394	181.823	172.175	167.625
ENSG00000134324.12	LPIN1	149.962	165.547	167.884	194.346	196.224	197.537	181.593	188.784	186.09
ENSG00000198040.11	ZNF84	173.195	172.817	181.837	166.496	169.649	180.36	164.808	175.599	176.765
ENSG00000146830.11	GIGYF1	156.426	157.199	188.842	173.016	171.005	186.299	177.224	180.797	188.199
ENSG00000130520.11	LSM 4.00	166.283	168.557	163.738	175.282	164.388	158.867	168.947	169.64	168.365
ENSG00000160294.11	MCM3AP	171.147	171.17	172.087	172.74	167.968	170.703	160.841	164.568	167.181
ENSG00000172845.17	SP3	167.499	162.026	167.548	172.408	172.415	175.147	178.431	178.98	179.762
ENSG00000073614.13	KDM5A	162.378	170.602	145.638	181.029	180.767	190.956	184.985	185.234	188.902
ENSG00000138080.14	EMILIN1	190.988	183.834	173.6	155.941	156.903	146.219	148.942	143.057	150.271
ENSG00000064419.13	TNPO3	176.907	170.375	166.147	174.453	169.866	165.191	163.83	167.189	165.923
ENSG00000163872.16	YEATS2	171.595	172.419	175.281	175.89	165.961	175.488	166.302	159.75	162.408
ENSG00000095139.14	ARCN1	174.475	178.553	170.574	173.514	166.666	161.73	160.209	163.131	162.001
ENSG00000144730.19	IL17RD	149.642	152.088	154.604	213.3	196.333	212.62	194.182	228.257	212.695
ENSG00000125970.12	RALY	183.308	176.906	164.69	161.633	164.388	151.09	166.417	160.511	161.853
ENSG00000153904.21	DDAH1	168.267	169.352	168.276	176.276	169.215	174.078	167.567	186.418	174.915
ENSG00000162402.14	USP24	165.771	166.002	160.712	177.99	178.543	180.616	179.121	172.049	174.212
ENSG00000171208.10	NETO2	173.515	174.918	174.16	169.811	169.974	163.567	167.797	163.977	173.805
ENSG00000136451.9	VEZF1	167.691	160.493	155.444	187.605	186.841	186.555	184.41	183.333	178.393
ENSG00000167491.17	GATAD2A	185.548	182.471	168.949	153.51	151.155	150.364	170.614	157.637	149.604
ENSG00000160633.13	SAFB	178.187	179.518	176.066	159.146	158.747	153.654	167.107	155.271	155.71
ENSG00000205531.13	NAP1L4	174.603	173.725	170.294	160.914	156.741	156.26	161.761	158.567	161.816
ENSG00000112972.15	HMGCS1	158.858	153.28	177.691	161.578	166.015	160.747	160.784	165.583	170.215
ENSG00000114346.14	ECT2	161.994	161.913	163.289	188.378	193.892	193.477	184.64	192.377	196.007
ENSG00000011426.11	ANLN	163.275	167.933	171.695	175.061	184.455	185.743	174.235	172.556	175.137
ENSG00000117362.13	APH1A	177.675	178.212	164.13	167.711	166.666	152.287	142.504	162.667	168.143
ENSG00000100297.16	MCM5	185.996	184.232	175.897	144.06	135.48	131.221	152.046	134.858	139.91
ENSG00000177200.17	CHD9	177.739	176.395	167.212	165.059	177.784	184.846	167.509	168.879	179.651
ENSG00000158470.5	B4GALT5	183.564	178.723	176.066	161.135	167.425	148.783	149.632	153.031	160.409
ENSG00000151693.11	ASAP2	158.602	167.592	167.828	172.961	179.14	178.48	186.422	174.246	168.069
ENSG00000198826.11	ARHGAP11A	166.923	165.093	162.337	185.173	187.438	196.554	181.536	187.897	195.822
ENSG00000125630.16	POLR1B	178.059	175.543	174.553	165.28	159.561	157.286	152.104	150.495	154.045
ENSG00000102935.12	ZNF423	177.483	174.18	168.725	159.809	161.568	151.817	163.945	161.145	163.777
ENSG00000144021.3	CIAO1	166.731	171.283	179.708	172.961	170.896	165.661	161.359	169.09	169.438
ENSG00000132639.13	SNAP25	169.995	170.829	171.919	166.717	175.615	164.934	155.725	176.064	168.661
ENSG00000163597.15	SNHG16	151.946	155.325	155.5	169.866	156.632	162.499	270.579	175.345	164.591
ENSG00000143190.23	POU2F1	161.098	163.105	166.203	178.597	183.913	180.744	186.249	177.881	179.984
ENSG00000065413.20	ANKRD44	167.371	169.977	165.811	167.767	173.825	172.797	167.452	170.696	171.918
ENSG00000089685.15	BIRC5	173.451	167.251	157.574	177.105	176.211	160.362	164.463	173.063	176.691
ENSG00000025796.14	SEC63	172.555	174.293	174.777	162.959	162.219	170.575	173.89	172.175	166.959
ENSG00000108256.9	NUFIP2	187.212	178.95	178.699	169.866	166.124	165.319	148.195	151.383	154.415
ENSG00000171865.10	RNASEH1	176.715	178.666	174.721	152.018	144.484	148.355	154.978	149.523	151.196
ENSG00000171444.18	MCC	166.283	165.434	166.315	158.262	155.493	167.626	174.178	167.823	162.593
ENSG00000078304.19	PPP2R5C	160.714	160.436	155.052	186.555	182.015	181.684	175.27	185.488	184.351
ENSG00000113658.18	SMAD5	170.251	170.318	167.772	168.706	169.052	166.729	151.126	166.259	161.705
ENSG00000092841.19	MYL6	171.467	168.103	165.699	172.408	155.548	158.61	169.981	164.061	160.891
ENSG00000104904.12	OAZ1	179.596	172.93	161.552	156.438	143.128	142.373	134.456	151.298	151.973
ENSG00000257103.9	LSM14A	171.851	163.56	167.156	170.585	174.096	165.276	171.246	162.667	164.628
ENSG00000132485.14	ZRANB2	165.003	170.261	174.328	164.175	169.052	173.181	164.865	173.57	173.065
ENSG00000091527.16	CDV3	181.516	174.123	174.833	162.351	159.615	151.347	160.324	157.849	158.374
ENSG00000152291.14	TGOLN2	167.243	170.545	164.466	170.916	169.106	161.815	156.932	169.428	170.4
ENSG00000173230.15	GOLGB1	166.475	175.486	166.595	145.773	173.066	203.262	170.384	191.616	196.895
ENSG00000134318.14	ROCK2	169.419	171.908	172.367	162.241	177.35	179.761	162.623	169.217	172.399
ENSG00000105429.13	MEGF8	167.819	160.607	164.242	176.442	171.547	170.575	165.785	167.653	162.445
ENSG00000104381.14	GDAP1	163.787	154.53	162.953	170.364	180.767	179.291	171.993	182.952	176.876
ENSG00000139746.16	RBM26	166.219	169.068	172.423	168.872	177.079	183.094	169.981	173.274	173.583
ENSG00000005810.18	MYCBP2	171.403	168.046	146.198	173.127	168.347	166.558	162.623	164.737	166.478
ENSG00000056097.16	ZFR	175.947	170.034	171.415	164.617	165.202	163.311	167.28	163.216	162.408
ENSG00000113300.13	CNOT6	163.083	167.421	170.462	165.169	166.557	173.053	169.924	162.202	163.666
ENSG00000196576.16	PLXNB2	159.818	160.777	162	164.672	174.964	173.181	173.833	177.162	173.768
ENSG00000197457.10	STMN3	184.78	182.017	174.553	141.132	135.372	129.897	141.009	133.59	138.763
ENSG00000163527.10	STT3B	181.452	177.474	176.682	145.552	149.094	136.648	135.318	146.396	144.572
ENSG00000131504.17	DIAPH1	173.963	174.407	167.436	153.565	151.426	143.613	147.505	148.382	148.161
ENSG00000108557.19	RAI1	174.283	176.679	168.613	156.549	162.869	160.021	162.738	155.778	156.265
ENSG00000204217.15	BMPR2	166.283	162.878	160.431	178.1	184.401	187.624	170.269	164.822	167.995
ENSG00000132680.11	KHDC4	157.13	169.807	194.67	149.697	152.619	167.498	171.648	168.499	169.697
ENSG00000015676.18	NUDCD3	171.147	169.409	157.462	168.374	160.375	153.398	155.84	158.694	163.999
ENSG00000265972.6	TXNIP	141.193	154.984	146.927	184.786	181.906	182.667	204.414	236.752	223.13
ENSG00000137776.17	SLTM	174.283	170.261	177.242	158.262	164.768	171.173	160.439	171.034	167.995
ENSG00000149532.16	CPSF7	162.378	162.083	172.367	160.251	165.581	164.678	169.579	165.921	169.771
ENSG00000164109.14	MAD2L1	166.603	161.458	158.526	170.806	166.612	164.422	168.429	158.652	173.509
ENSG00000170312.16	CDK1	156.17	157.994	160.824	177.161	179.52	174.933	171.418	175.979	182.167
ENSG00000103353.16	UBFD1	178.315	172.817	173.6	145.276	143.67	139.425	137.79	144.24	149.308
ENSG00000173692.14	PSMD1	181.388	175.088	176.738	139.584	143.236	142.331	143.136	141.155	143.795
ENSG00000157827.20	FMNL2	160.522	162.708	168.781	176.442	172.089	168.182	163.141	175.176	169.919
ENSG00000127995.17	CASD1	159.626	163.73	165.867	162.627	170.896	170.147	159.059	167.231	173.287
ENSG00000184432.11	COPB2	179.02	176.508	175.393	159.588	157.12	154.252	153.656	155.736	146.94
ENSG00000131143.10	COX4I1	161.802	161.515	162.337	160.804	161.676	159.636	174.637	167.189	164.48
ENSG00000075785.14	RAB7A	172.363	171.34	162.449	167.656	156.198	153.44	159.922	162.413	161.409
ENSG00000089737.17	DDX24	164.939	158.732	161.608	163.346	164.334	161.089	177.454	165.202	164.628
ENSG00000149480.7	MTA2	168.843	167.535	169.677	154.67	153.053	157.158	161.531	149.692	155.858
ENSG00000170515.14	PA2G4	179.02	174.009	169.061	148.315	145.568	145.279	152.334	151.256	148.087
ENSG00000173320.12	STOX2	177.227	172.306	167.212	169.866	166.395	168.353	158.944	158.356	162.556
ENSG00000167721.11	TSR1	163.467	164.184	167.548	176.221	162.435	162.755	164.463	159.581	166.663
ENSG00000189079.17	ARID2	155.722	158.619	154.492	170.751	179.465	174.164	178.891	180.712	178.948
ENSG00000115207.13	GTF3C2	167.691	159.187	156.733	160.583	161.622	163.439	164.29	170.739	170.696
ENSG00000153207.16	AHCTF1	178.315	168.557	176.178	157.875	166.937	173.01	153.886	161.652	163.148
ENSG00000163125.15	RPRD2	163.211	168.898	161.832	167.767	169.269	165.191	172.798	162.033	164.073
ENSG00000069248.12	NUP133	164.555	173.953	165.026	162.793	161.297	153.568	150.667	162.117	163.481
ENSG00000112242.15	E2F3	167.563	165.15	168.613	152.57	158.151	149.338	160.439	160.849	163.851
ENSG00000127947.16	PTPN12	146.953	147.772	157.462	189.815	186.299	192.58	180.271	190.179	187.089
ENSG00000117450.15	PRDX1	167.243	169.296	160.095	148.315	146.87	135.964	143.136	143.606	144.202
ENSG00000054965.11	FAM168A	165.643	162.821	159.031	163.456	165.635	163.353	162.451	163.723	162.149
ENSG00000116489.13	CAPZA1	170.059	163.616	162.449	162.793	157.717	155.021	155.61	156.074	157.634
ENSG00000103769.10	RAB11A	158.474	159.357	162.225	171.248	162.164	158.012	162.796	164.484	169.734
ENSG00000196715.7	VKORC1L1	171.531	173.953	170.574	149.476	149.744	146.518	143.194	145.17	145.978
ENSG00000177119.17	ANO6	164.043	170.999	159.479	164.506	167.425	157.841	162.968	159.497	158.744
ENSG00000118482.12	PHF3	167.243	169.75	163.962	152.128	166.124	173.053	158.714	169.978	169.993
ENSG00000033327.13	GAB2	138.697	140.275	148.272	199.983	203.383	200.613	208.496	215.283	199.374
ENSG00000124767.7	GLO1	168.843	166.058	156.901	157.157	152.456	147.672	149.919	155.482	157.782
ENSG00000158710.15	TAGLN2	178.572	164.525	164.074	148.813	142.26	136.776	139.744	149.481	152.047
ENSG00000169727.12	GPS1	165.131	165.093	156.565	157.875	153.107	153.654	155.438	163.892	162.741
ENSG00000273749.5	CYFIP1	162.634	170.715	166.091	148.868	155.276	154.338	152.161	149.65	153.527
ENSG00000097007.19	ABL1	162.826	163.049	150.961	167.711	159.995	159.892	160.151	166.386	159.151
ENSG00000115808.12	STRN	164.171	165.888	155.444	164.396	166.232	169.036	154.46	163.258	166.589
ENSG00000230989.7	HSBP1	167.435	159.811	157.293	156.659	154.788	156.132	152.391	160.553	161.113
ENSG00000154001.14	PPP2R5E	160.458	161.174	157.405	170.419	168.401	164.08	170.786	165.921	167.551
ENSG00000167654.18	ATCAY	157.898	150.611	154.492	182.355	178.977	174.292	178.489	174.669	174.36
ENSG00000133226.17	SRRM1	159.498	159.244	163.009	154.946	150.558	158.44	185.387	154.637	153.379
ENSG00000084731.15	KIF3C	159.882	152.088	151.466	176.94	175.398	171.814	171.246	172.936	166.219
ENSG00000164889.15	SLC4A2	165.515	158.676	151.017	163.567	158.259	154.209	154.231	159.624	158.041
ENSG00000106462.11	EZH2	154.378	157.256	170.966	159.036	158.802	156.559	165.727	149.185	157.782
ENSG00000148019.14	CEP78	169.995	169.636	170.742	142.126	153.27	162.542	148.31	151.509	154.563
ENSG00000188848.16	BEND4	172.747	167.592	159.591	166.496	167.805	162.627	145.78	149.439	150.456
ENSG00000116133.13	DHCR24	158.474	156.801	166.091	156.659	157.554	138.571	147.792	154.468	153.268
ENSG00000110880.11	CORO1C	173.067	174.18	159.759	162.627	152.999	152.158	150.954	149.185	148.309
ENSG00000083520.15	DIS3	166.731	167.138	160.431	160.693	166.72	168.951	165.555	173.739	168.513
ENSG00000163902.12	RPN1	175.627	181.051	167.66	131.682	131.304	130.196	137.1	131.266	131.51
ENSG00000173575.22	CHD2	159.754	163.503	162.505	164.23	167.262	170.105	161.704	162.286	163.185
ENSG00000148248.14	SURF4	186.252	178.723	166.595	134.998	133.528	126.435	124.511	133.548	135.062
ENSG00000173660.12	UQCRH	162.442	157.767	151.69	162.959	159.29	154.722	155.438	160.934	158.855
ENSG00000131263.13	RLIM	152.266	159.187	157.125	168.209	173.066	176.599	178.949	169.682	177.172
ENSG00000100503.26	NIN	161.418	170.034	163.177	149.2	157.554	165.618	156.645	159.581	164.998
ENSG00000106799.13	TGFBR1	168.715	156.745	154.884	162.904	164.171	161.174	167.394	163.216	162.482
ENSG00000069329.18	VPS35	160.842	162.765	157.686	165.556	162.707	159.807	149.977	161.525	158.707
ENSG00000156970.13	BUB1B	154.314	151.974	153.819	178.929	181.635	175.446	187.054	174.289	174.545
ENSG00000139438.6	FAM222A	192.46	185.538	162	126.378	130.653	122.077	128.018	120.531	126.699
ENSG00000169018.6	FEM1B	166.411	160.663	159.199	155.775	160.483	160.704	159.002	155.482	154.933
ENSG00000150995.20	ITPR1	150.986	146.579	139.754	188.268	187.221	197.238	195.159	191.701	184.314
ENSG00000060339.14	CCAR1	164.491	162.083	168.052	166.385	162.598	175.574	167.854	166.85	168.217
ENSG00000178904.19	DPY19L3	158.346	154.814	162.337	160.03	159.941	164.379	158.772	167.231	167.847
ENSG00000164548.11	TRA2A	172.299	170.659	183.798	133.837	139.168	144.98	139.63	126.533	133.027
ENSG00000100632.11	ERH	163.723	159.244	160.543	151.852	149.039	139.169	144.171	147.283	153.009
ENSG00000174953.14	DHX36	159.818	160.607	163.569	164.506	164.008	178.18	159.922	169.302	168.994
ENSG00000178035.13	IMPDH2	140.681	141.695	142.78	191.252	177.296	181.898	174.695	194.828	185.239
ENSG00000011258.16	MBTD1	138.505	140.559	149.112	190.257	191.072	193.435	193.55	196.476	188.347
ENSG00000101444.13	AHCY	154.058	158.221	155.949	164.727	162.327	159.038	158.139	156.581	158.892
ENSG00000105251.11	SHD	184.012	173.953	165.138	131.627	138.897	127.461	134.283	127.124	136.32
ENSG00000125676.20	THOC2	154.826	155.495	162.953	162.517	169.161	174.805	159.002	177.67	177.172
ENSG00000005801.18	ZNF195	142.601	148.396	164.634	171.248	171.059	190.23	170.499	179.74	183.426
ENSG00000108883.13	EFTUD2	175.499	163.844	158.638	150.028	144.809	143.014	144.861	152.439	150.567
ENSG00000128872.10	TMOD2	164.811	166.002	160.768	153.454	151.805	165.704	150.264	152.862	148.087
ENSG00000180354.16	MTURN	149.898	152.315	150.681	171.579	172.686	165.832	159.864	170.654	167.588
ENSG00000129128.13	SPCS3	177.483	173.328	162.841	136.545	136.511	138.784	130.834	128.772	136.69
ENSG00000233927.5	RPS28	160.394	155.609	133.702	164.396	164.768	152.842	152.449	168.625	161.409
ENSG00000198793.13	MTOR	158.474	161.061	162.337	155.223	151.588	150.876	150.839	151.974	149.234
ENSG00000108819.11	PPP1R9B	172.171	167.705	158.862	147.763	151.697	151.432	154.173	141.62	140.095
ENSG00000134759.14	ELP2	154.186	159.016	158.638	169.645	162.11	168.054	159.979	165.245	166.922
ENSG00000196365.12	LONP1	159.882	164.014	156.117	155.554	145.677	151.517	151.529	152.989	149.049
ENSG00000164134.13	NAA15	169.419	163.957	169.565	143.95	150.449	147.501	145.378	152.481	153.379
ENSG00000174705.13	SH3PXD2B	157.258	158.789	146.03	169.922	162.219	159.764	153.311	157.722	161.557
ENSG00000157064.11	NMNAT2	151.306	154.927	147.823	166.938	170.625	162.542	163.486	163.3	163.999
ENSG00000102531.16	FNDC3A	158.41	162.935	156.341	162.351	169.052	162.285	150.494	156.031	164.776
ENSG00000108960.9	MMD	164.683	155.041	158.638	151.962	156.632	151.688	158.772	152.735	156.857
ENSG00000029993.15	HMGB3	157.066	158.903	157.237	158.317	162.327	155.534	162.853	162.328	160.557
ENSG00000100823.12	APEX1	148.682	148.056	149	170.861	163.846	164.464	167.854	168.372	169.031
ENSG00000058804.12	NDC1	158.218	156.631	154.043	154.007	150.775	145.535	151.759	152.059	159.632
ENSG00000143126.8	CELSR2	155.914	161.004	160.88	155.72	159.507	161.388	151.644	157.553	151.973
ENSG00000143727.16	ACP1	154.058	156.12	155.78	154.339	152.619	148.954	153.426	156.961	155.821
ENSG00000197170.10	PSMD12	161.29	159.868	160.543	154.062	153.704	154.679	154.288	152.059	152.306
ENSG00000196405.13	EVL	157.002	161.629	160.6	160.362	156.795	158.952	150.322	161.568	160.335
ENSG00000110713.17	NUP98	161.034	163.389	160.824	156.715	155.548	158.055	146.413	153.115	152.121
ENSG00000091039.17	OSBPL8	160.266	158.278	162.841	153.344	167.371	165.575	146.585	162.54	162.038
ENSG00000067141.17	NEO1	158.346	154.814	151.914	165.556	169.378	158.226	159.462	162.878	162.815
ENSG00000006451.8	RALA	161.674	160.777	163.401	157.875	150.395	151.047	152.621	153.665	147.495
ENSG00000029364.12	SLC39A9	153.162	155.893	155.332	154.007	155.114	146.732	148.482	157.891	153.897
ENSG00000134744.14	TUT4	149.322	146.749	161.216	166.275	170.842	185.914	176.937	163.554	164.295
ENSG00000141551.14	CSNK1D	155.914	157.881	161.272	155.168	152.782	155.278	154.518	158.271	165.072
ENSG00000143514.17	TP53BP2	147.017	153.28	154.436	171.856	165.581	167.413	174.235	166.174	170.104
ENSG00000170558.10	CDH2	150.026	151.747	145.806	175.006	177.188	172.711	178.431	183.798	169.771
ENSG00000078687.17	TNRC6C	160.906	154.53	159.367	156.273	154.083	155.577	172.281	154.045	155.969
ENSG00000140612.14	SEC11A	146.953	147.999	152.138	171.69	155.656	165.02	162.796	173.612	165.627
ENSG00000048828.17	FAM120A	168.587	169.977	169.285	144.889	143.128	141.69	136.87	136.887	134.322
ENSG00000108984.15	MAP2K6	163.019	159.868	159.311	147.376	145.297	144.296	143.998	142.592	152.158
ENSG00000204394.13	VARS1	156.17	156.063	150.401	145.773	150.449	145.407	149.402	151.002	139.873
ENSG00000070367.16	EXOC5	161.802	156.915	156.341	160.03	164.768	164.336	147.39	160.765	156.635
ENSG00000214022.11	REPIN1	161.162	167.194	155.332	144.281	148.931	138.314	145.895	146.691	149.938
ENSG00000141905.19	NFIC	187.084	175.486	165.251	123.338	129.786	123.786	143.366	122.433	119.891
ENSG00000100154.14	TTC28	155.914	154.927	157.966	155.554	152.782	159.038	164.29	157.046	151.825
ENSG00000105778.19	AVL9	146.697	151.52	152.362	161.578	165.147	161.388	158.944	158.905	163.555
ENSG00000259956.2	RBM15B	149.13	147.374	141.491	169.48	160.049	160.918	169.464	168.118	168.328
ENSG00000026025.16	VIM	164.363	164.525	153.371	146.823	145.677	135.366	147.102	146.818	144.091
ENSG00000145920.15	CPLX2	172.235	165.718	158.19	128.864	130.328	124.342	131.524	130.252	132.657
ENSG00000130338.13	TULP4	156.938	154.53	151.97	149.863	151.588	154.508	178.144	150.537	154.23
ENSG00000198315.11	ZKSCAN8	144.073	149.646	149	171.027	167.696	173.309	169.464	169.386	171.955
ENSG00000176986.16	SEC24C	159.114	166.342	163.177	144.337	144.429	141.775	136.928	138.155	141.686
ENSG00000135446.17	CDK4	158.346	156.404	149.112	149.531	142.64	136.69	142.216	146.269	152.084
ENSG00000168496.4	FEN1	171.851	164.582	156.509	135.772	130.22	127.162	127.098	132.661	136.172
ENSG00000088986.11	DYNLL1	165.259	167.535	165.194	137.816	127.291	132.375	130.777	128.308	124.96
ENSG00000117335.20	CD46	130.952	131.927	140.539	177.768	180.062	186.641	177.454	181.008	186.756
ENSG00000101974.14	ATP11C	152.778	156.006	151.634	158.704	161.676	156.089	151.931	150.495	160.187
ENSG00000171992.13	SYNPO	182.028	176.849	164.242	122.399	124.904	121.564	134.743	119.94	122.148
ENSG00000204371.11	EHMT2	152.522	159.641	152.194	152.46	150.775	153.355	146.988	145.593	147.532
ENSG00000070831.17	CDC42	157.834	148.283	155.949	158.428	155.873	154.936	163.313	160.638	158.781
ENSG00000160991.16	ORAI2	169.675	168.273	158.918	138.866	138.952	136.52	129.8	136.126	130.659
ENSG00000198162.12	MAN1A2	157.898	156.745	161.608	156.991	160.917	155.021	145.091	150.453	152.713
ENSG00000100714.17	MTHFD1	161.802	164.809	165.699	134.722	134.287	132.204	136.468	133.125	136.468
ENSG00000137942.18	FNBP1L	145.353	144.137	148.832	162.849	171.71	171.728	166.13	171.077	168.883
ENSG00000116350.17	SRSF4	152.778	155.836	153.931	156.659	154.571	155.876	166.532	151.89	153.712
ENSG00000085563.15	ABCB1	156.554	154.416	155.276	153.952	154.409	154.38	146.585	145.001	153.157
ENSG00000164151.12	ICE1	158.858	158.619	149.28	153.289	162.381	158.354	148.252	152.989	157.301
ENSG00000115091.12	ACTR3	163.403	156.688	152.642	145.221	151.317	143.228	148.77	142.169	146.866
ENSG00000123505.19	AMD 1.00	173.643	163.957	158.47	138.424	131.359	133.315	136.295	135.238	140.724
ENSG00000079332.15	SAR1A	154.826	158.335	157.181	153.841	153.107	147.843	152.678	155.313	149.938
ENSG00000188895.12	MSL1	158.922	148.851	160.992	155.278	146.707	153.312	148.942	149.396	149.086
ENSG00000100591.8	AHSA1	173.451	167.138	165.979	129.085	126.315	127.461	129.282	125.138	121.889
ENSG00000106609.16	TMEM248	154.122	151.463	151.129	161.799	159.453	152.543	161.244	158.652	154.674
ENSG00000119402.17	FBXW2	149.706	150.043	154.66	153.731	153.215	157.756	161.876	145.973	156.228
ENSG00000187605.16	TET3	157.386	155.552	153.035	152.957	157.717	158.397	161.991	162.117	162.445
ENSG00000112655.16	PTK7	155.53	157.994	151.914	148.647	146.87	149.296	146.643	152.989	147.31
ENSG00000141279.17	NPEPPS	148.618	148.964	152.923	168.264	159.127	162.712	156.472	151.002	153.231
ENSG00000011405.13	PIK3C2A	154.954	155.268	154.267	153.454	163.249	167.669	150.092	157.553	157.782
ENSG00000100426.7	ZBED4	158.282	154.927	145.694	155.996	153.487	151.133	157.22	154.89	151.566
ENSG00000245532.9	NEAT1	106.567	125.68	173.712	174.508	185.648	240.351	261.841	182.783	191.566
ENSG00000159352.16	PSMD4	152.586	152.883	150.457	158.483	152.782	149.296	155.265	154.679	158.004
ENSG00000167815.12	PRDX2	153.098	159.414	142.892	147.708	145.134	143.527	142.044	153.496	148.901
ENSG00000162909.18	CAPN2	147.273	146.693	147.823	158.87	161.785	156.517	163.198	157.511	161.742
ENSG00000182446.14	NPLOC4	157.642	158.505	150.457	144.392	144.755	136.391	149.344	143.818	151.751
ENSG00000151276.23	MAGI1	137.673	143.683	142.388	176.498	174.422	180.573	174.465	172.852	174.434
ENSG00000143155.13	TIPRL	152.394	150.157	156.117	153.123	147.033	150.577	151.989	151.171	151.936
ENSG00000132383.12	RPA1	157.898	158.903	153.931	145.773	141.609	138.271	136.87	142.127	140.798
ENSG00000134086.8	VHL	154.186	152.542	153.875	151.189	148.714	146.988	152.046	149.608	146.533
ENSG00000108349.17	CASC3	152.394	150.384	155.556	158.373	161.676	153.526	158.772	158.567	158.152
ENSG00000132912.13	DCTN4	153.354	151.066	143.06	154.725	156.958	147.928	163.486	155.609	157.227
ENSG00000100731.16	PCNX1	154.122	151.577	143.901	160.307	161.08	157.029	152.966	152.439	157.56
ENSG00000106603.19	COA1	150.73	152.769	151.634	149.752	150.612	154.295	152.161	150.411	155.34
ENSG00000084463.8	WBP11	149.386	150.725	155.108	160.251	154.951	150.834	161.531	155.693	149.012
ENSG00000100422.14	CERK	159.242	159.471	145.358	150.802	152.673	148.313	140.204	149.734	150.234
ENSG00000074695.6	LMAN1	157.13	157.71	157.686	147.486	147.575	146.988	139.687	145.001	140.909
ENSG00000103197.18	TSC2	135.305	139.139	159.479	151.189	158.964	161.943	167.107	164.78	168.328
ENSG00000093000.19	NUP50	159.946	152.826	154.043	145.829	144.809	143.1	140.434	145.255	144.72
ENSG00000018510.18	AGPS	156.682	151.861	154.716	144.613	145.026	147.031	143.423	140.986	146.755
ENSG00000136813.14	ECPAS	154.634	157.085	151.298	151.797	148.714	147.757	143.998	151.552	147.532
ENSG00000188486.3	H2AX	154.122	149.248	140.483	146.16	149.31	138.485	150.034	148.636	153.712
ENSG00000125304.10	TM9SF2	151.882	151.917	146.871	153.731	147.141	139.511	147.85	150.242	144.572
ENSG00000099942.13	CRKL	150.026	157.597	149.224	160.417	156.144	149.808	148.482	150.411	155.266
ENSG00000198952.8	SMG5	152.842	156.972	158.022	135.219	139.385	141.348	141.756	131.731	142.648
ENSG00000102038.16	SMARCA1	140.681	145.273	141.379	173.9	170.083	168.78	163.715	175.43	170.585
ENSG00000183255.12	PTTG1IP	142.921	143.796	143.509	160.693	163.086	155.107	150.839	163.723	160.335
ENSG00000109046.15	WSB1	120.328	122.84	141.547	182.41	186.95	208.262	180.156	197.702	192.861
ENSG00000124942.14	AHNAK	182.092	171.17	161.664	121.183	122.844	115.411	118.993	106.416	117.745
ENSG00000107341.5	UBE2R2	147.978	149.475	146.591	153.068	155.602	143.442	148.999	155.313	154.785
ENSG00000173821.19	RNF213	140.809	143.853	144.629	169.922	162.815	172.583	163.773	158.947	155.969
ENSG00000106052.13	TAX1BP1	146.505	146.409	149.28	156.273	160.049	165.02	154.058	163.723	163.407
ENSG00000154305.18	MIA3	155.402	158.392	156.957	146.105	147.629	154.508	142.791	147.325	145.608
ENSG00000082153.18	BZW1	156.618	159.414	148.664	137.319	141.175	132.033	136.295	133.886	139.762
ENSG00000204574.14	ABCF1	156.106	148.567	152.811	151.797	147.521	145.706	161.129	149.565	149.419
ENSG00000108406.10	DHX40	129.48	132.892	135.103	177.547	178.869	181.001	181.191	183.882	182.241
ENSG00000168374.11	ARF4	164.107	157.426	154.828	135.219	130.816	131.691	134.686	131.646	129.401
ENSG00000132437.18	DDC	151.754	149.191	140.819	148.978	146.544	147.245	142.734	151.805	143.684
ENSG00000138138.14	ATAD1	145.673	150.725	146.815	149.752	149.69	154.038	148.195	153.453	153.786
ENSG00000075043.19	KCNQ2	157.322	156.858	146.254	143.784	145.514	144.04	134.169	141.705	141.464
ENSG00000006715.16	VPS41	142.217	148.964	145.638	157.102	152.673	154.38	153.023	156.581	155.821
ENSG00000167972.14	ABCA3	154.954	152.201	148.047	150.249	148.931	140.579	138.997	144.79	144.276
ENSG00000137504.14	CREBZF	136.969	139.707	149.616	148.15	148.226	156.859	165.842	165.033	160.928
ENSG00000120071.15	KANSL1	137.801	144.307	142.612	153.289	156.524	157.329	182.57	157.975	157.412
ENSG00000089053.13	ANAPC5	141.129	147.204	158.19	144.889	145.622	145.194	150.781	149.312	154.193
ENSG00000115419.13	GLS	153.418	157.824	152.811	148.813	149.039	150.107	138.767	138.873	142.389
ENSG00000197771.13	MCMBP	160.458	154.473	145.19	138.203	140.145	134.383	135.376	138.704	138.096
ENSG00000204590.12	GNL1	155.53	157.369	154.66	143.95	138.355	146.732	140.664	142.508	137.06
ENSG00000089199.10	CHGB	147.402	154.643	159.255	142.347	143.182	150.15	152.966	155.059	141.945
ENSG00000100614.18	PPM1A	148.298	149.873	149.672	149.863	157.392	150.535	149.344	150.622	154.6
ENSG00000055070.17	SZRD1	155.338	153.28	146.647	140.8	140.524	131.819	140.664	135.999	135.691
ENSG00000157680.16	DGKI	155.082	149.305	145.862	148.15	155.276	152.628	141.124	144.536	150.345
ENSG00000134900.12	TPP2	161.418	154.359	153.371	142.071	148.28	144.339	134.169	143.099	144.165
ENSG00000172915.19	NBEA	141.321	134.653	142.5	161.301	168.456	169.464	161.933	177.036	169.993
ENSG00000096401.8	CDC5L	156.298	161.799	149.336	143.342	146.328	143.143	146.815	143.564	143.462
ENSG00000241973.11	PI4KA	143.369	139.366	138.465	164.009	158.368	162.499	154.403	152.439	160.15
ENSG00000139146.14	SINHCAF	140.041	139.48	138.465	167.048	162.598	162.926	154.058	167.02	162.334
ENSG00000164916.11	FOXK1	158.858	144.535	126.698	148.868	157.337	149.552	144.976	151.129	147.051
ENSG00000204131.9	NHSL2	165.451	154.814	157.293	130.632	128.376	133.828	132.272	113.135	120.298
ENSG00000090273.14	NUDC	166.283	164.241	162.449	123.78	122.952	117.035	126.581	118.883	116.042
ENSG00000132405.19	TBC1D14	153.802	153.167	152.138	140.303	136.565	138.571	141.124	141.958	146.311
ENSG00000142207.7	URB1	153.162	147.374	150.009	142.347	138.735	133.699	141.354	139.211	136.431
ENSG00000126602.11	TRAP1	147.53	151.804	153.931	137.485	139.765	137.972	135.203	143.522	142.944
ENSG00000125166.13	GOT2	151.178	148.68	146.366	144.116	139.928	133.101	129.857	140.648	139.725
ENSG00000166483.12	WEE1	149.386	142.036	145.021	136.048	143.019	142.202	146.585	143.691	155.451
ENSG00000101557.15	USP14	159.818	150.895	154.267	143.674	141.826	137.63	133.709	137.352	137.06
ENSG00000092853.14	CLSPN	163.979	163.162	163.065	114.221	118.776	123.359	143.941	116.305	122.296
ENSG00000168411.14	RFWD3	149.578	154.587	148.047	135.882	135.643	129.127	145.838	145.677	142.907
ENSG00000160299.17	PCNT	144.137	140.843	150.289	156.881	153.649	155.449	162.336	149.269	147.051
ENSG00000181904.9	C5orf24	152.522	146.522	150.401	148.426	149.148	148.27	150.034	141.874	145.83
ENSG00000136279.21	DBNL	160.714	149.078	148.44	142.182	141.826	140.963	151.874	139.972	142.167
ENSG00000134684.12	YARS1	162.186	167.138	157.518	116.044	117.691	111.694	107.841	110.177	109.678
ENSG00000139687.16	RB1	160.138	151.122	153.035	141.961	142.911	140.451	139.342	138.197	136.024
ENSG00000102974.16	CTCF	153.802	153.621	148.72	142.734	140.904	135.28	145.378	133.717	139.244
ENSG00000087258.16	GNAO1	152.394	152.599	149.336	141.684	145.785	142.16	139.457	143.057	133.138
ENSG00000175931.13	UBE2O	145.673	147.658	151.41	149.697	151.643	147.458	145.838	154.172	150.604
ENSG00000134853.12	PDGFRA	112.455	119.489	118.909	191.86	193.729	202.579	184.755	213.423	203.074
ENSG00000174469.23	CNTNAP2	142.025	136.016	141.996	163.346	160.646	170.532	161.933	165.118	159.817
ENSG00000139618.17	BRCA2	150.73	166.74	143.957	122.233	140.904	144.681	132.904	138.281	137.8
ENSG00000196526.10	AFAP1	147.017	147.26	146.366	150.692	147.9	150.535	151.989	151.214	148.087
ENSG00000147416.11	ATP6V1B2	153.994	146.92	144.069	141.297	146.816	138.784	135.203	145.424	146.015
ENSG00000174938.14	SEZ6L2	148.17	143.228	141.155	151.134	156.578	147.501	145.895	155.482	156.265
ENSG00000144554.12	FANCD2	150.218	155.211	154.66	132.124	137.053	128.059	129.742	134.605	131.658
ENSG00000160679.13	CHTOP	144.713	146.863	146.03	142.126	137.867	137.331	145.953	148.593	153.638
ENSG00000137876.11	RSL24D1	141.257	146.977	140.37	151.244	152.239	141.732	142.619	161.018	152.972
ENSG00000162734.13	PEA15	147.914	147.147	154.211	144.779	134.233	132.588	147.447	138.281	137.689
ENSG00000148848.14	ADAM12	147.081	146.181	144.909	160.251	148.009	145.92	148.252	136.506	144.868
ENSG00000185278.15	ZBTB37	142.985	138.571	123.279	156.549	170.896	167.199	160.381	155.355	159.78
ENSG00000165997.5	ARL5B	147.786	150.27	145.302	148.978	153.704	153.526	137.56	151.002	154.082
ENSG00000008952.17	SEC62	152.266	153.451	153.035	141.132	142.585	152.927	132.846	146.649	149.197
ENSG00000197601.13	FAR1	155.722	156.29	153.539	131.075	146.165	141.903	122.902	139.465	140.206
ENSG00000110651.12	CD81	153.674	144.932	135.215	149.531	141.175	145.749	141.182	148.171	144.054
ENSG00000102898.12	NUTF2	149.066	151.463	149.616	134.556	133.04	128.914	138.02	132.745	124.886
ENSG00000090861.17	AARS1	160.65	160.266	159.591	115.657	118.884	114.77	114.796	114.615	111.639
ENSG00000138430.16	OLA1	142.537	143.058	148.047	154.283	149.039	153.141	151.126	155.693	151.566
ENSG00000130811.12	EIF3G	141.193	144.591	148.384	157.875	143.507	147.928	156.013	149.946	144.831
ENSG00000197323.12	TRIM33	138.761	144.478	143.957	152.128	162.219	163.524	160.036	164.442	159.225
ENSG00000157216.16	SSBP3	149.706	152.429	153.091	143.066	138.952	144.595	145.263	137.605	142.389
ENSG00000104093.14	DMXL2	143.561	141.695	128.323	153.676	163.954	170.361	146.643	162.836	162.445
ENSG00000111674.9	ENO2	134.729	135.221	141.211	160.528	153.487	158.354	148.137	160.089	163.999
ENSG00000137845.15	ADAM10	151.754	144.705	146.534	138.756	142.043	137.203	140.147	140.394	140.983
ENSG00000143469.20	SYT14	146.185	146.92	140.314	146.381	160.429	158.867	156.013	153.749	150.641
ENSG00000135052.16	GOLM1	147.85	144.875	148.552	147.21	147.033	148.185	153.828	144.156	139.503
ENSG00000163811.12	WDR43	146.377	150.27	149.056	142.845	140.307	139.553	146.183	145.001	141.427
ENSG00000132463.14	GRSF1	146.441	146.068	144.965	144.668	143.995	141.262	143.538	146.818	148.901
ENSG00000171988.19	JMJD1C	134.409	136.981	138.633	153.731	165.364	173.01	167.624	180.501	177.209
ENSG00000113719.16	ERGIC1	149.386	147.544	141.099	136.048	142.206	135.067	142.791	142.972	137.763
ENSG00000136636.13	KCTD3	142.089	146.011	144.965	151.41	145.677	149.253	146.125	150.326	148.753
ENSG00000126001.16	CEP250	140.937	145.557	144.741	154.339	154.951	158.012	164.06	148.72	142.5
ENSG00000074201.9	CLNS1A	141.193	138.799	139.754	157.157	152.131	158.311	158.944	157.215	156.709
ENSG00000118007.13	STAG1	147.273	146.636	141.94	141.961	146.599	144.553	143.768	144.409	143.314
ENSG00000167193.8	CRK	145.353	141.354	149.504	145.994	142.802	138.4	133.536	143.987	140.65
ENSG00000184216.14	IRAK1	163.915	157.426	152.138	121.183	117.691	111.352	121.867	115.333	121.667
ENSG00000112701.18	SENP6	148.298	146.522	155.108	143.618	152.999	158.397	147.62	152.143	148.013
ENSG00000099284.15	MACROH2A2	150.986	151.179	143.172	138.313	141.934	139.639	148.827	139.93	143.055
ENSG00000124702.18	KLHDC3	141.321	136.357	138.409	156.881	148.334	145.322	143.194	149.439	147.088
ENSG00000108582.12	CPD	140.809	145.5	137.961	151.576	149.961	145.108	135.376	149.312	147.902
ENSG00000102054.18	RBBP7	145.545	142.092	148.776	146.713	142.26	144.04	147.907	150.157	147.902
ENSG00000106554.13	CHCHD3	153.29	151.52	149.336	135.716	134.775	128.743	141.182	128.73	131.214
ENSG00000205903.7	ZNF316	144.777	147.772	140.987	147.155	146.761	145.236	136.928	146.776	141.945
ENSG00000113575.10	PPP2CA	149.45	144.421	146.478	140.469	143.345	134.597	137.158	142.254	142.648
ENSG00000185219.17	ZNF445	139.337	145.216	149.953	144.945	146.544	152.158	164.865	139.634	146.977
ENSG00000037474.15	NSUN2	145.033	145.443	148.272	141.408	138.301	140.835	149.172	140.648	143.166
ENSG00000107164.16	FUBP3	145.673	148.737	150.569	141.408	143.399	144.724	159.232	143.353	141.908
ENSG00000106086.20	PLEKHA8	147.337	143.853	142.108	153.233	146.544	146.86	147.217	139.507	140.798
ENSG00000175792.12	RUVBL1	151.37	151.633	146.534	135.385	128.972	126.265	129.052	126.617	132.694
ENSG00000176871.9	WSB2	159.498	153.167	144.181	128.698	129.677	124.726	125.891	129.11	133.841
ENSG00000175029.17	CTBP2	150.09	151.009	148.608	140.082	139.06	140.408	137.675	136.76	132.361
ENSG00000144366.16	GULP1	139.017	143.91	143.565	135.661	151.914	153.526	143.883	148.805	151.529
ENSG00000099331.13	MYO9B	143.689	149.986	150.121	139.087	135.643	139.981	138.825	134.943	132.842
ENSG00000145725.20	PPIP5K2	144.009	137.436	139.586	148.094	153.704	154.252	145.838	151.847	150.308
ENSG00000111581.10	NUP107	140.553	146.749	150.401	139.253	140.199	140.023	136.18	140.817	146.94
ENSG00000160714.10	UBE2Q1	138.761	138.344	142.332	148.923	141.718	143.741	147.85	143.522	139.318
ENSG00000090372.15	STRN4	146.889	148.169	144.461	141.684	138.952	136.605	144.286	136.802	137.763
ENSG00000065183.16	WDR3	150.154	144.251	149.392	141.74	137.921	134.768	135.146	140.944	142.241
ENSG00000132305.21	IMMT	143.049	144.478	143.452	147.873	141.718	139.126	137.158	147.199	144.461
ENSG00000065883.16	CDK13	142.921	138.287	137.289	151.852	156.09	157.713	156.185	149.143	148.457
ENSG00000167085.13	PHB	153.866	156.915	147.935	130.19	126.098	122.205	130.202	126.025	129.475
ENSG00000151923.18	TIAL1	141.129	142.036	151.298	135.827	145.731	146.732	142.331	136.591	142.019
ENSG00000165802.23	NSMF	147.145	151.122	150.233	129.03	129.298	124.812	123.879	130.885	123.776
ENSG00000145860.12	RNF145	142.345	138.969	141.211	149.697	143.887	135.793	126.753	141.874	143.573
ENSG00000089693.11	MLF 2.00	145.673	143.683	137.681	142.126	148.009	135.195	149.057	147.748	139.318
ENSG00000156103.16	MMP16	150.858	151.293	141.323	136.49	143.724	146.39	132.099	148.382	148.568
ENSG00000140943.17	MBTPS1	142.409	139.594	137.457	150.47	152.619	145.706	146.815	150.03	152.565
ENSG00000103550.14	KNOP1	143.369	142.944	139.754	140.303	140.036	142.886	143.653	142.634	142.278
ENSG00000161813.22	LARP4	157.13	161.061	161.272	118.918	127.779	126.991	111.52	120.658	119.817
ENSG00000049656.14	CLPTM1L	153.802	149.703	143.565	129.085	128.376	118.787	125.316	126.279	123.332
ENSG00000162430.17	SELENON	149.13	150.327	146.478	132.677	142.802	129.555	131.812	131.604	134.507
ENSG00000187231.14	SESTD1	138.569	139.821	137.625	147.873	146.219	139.938	138.077	147.664	149.975
ENSG00000005007.13	UPF1	152.074	147.147	148.72	125.107	123.223	120.496	127.845	130.463	122.777
ENSG00000105290.13	APLP1	146.249	136.868	140.819	144.558	137.65	134.383	143.309	130.674	137.985
ENSG00000138107.13	ACTR1A	148.938	144.194	139.306	144.116	143.724	135.793	133.594	138.197	136.764
ENSG00000151725.12	CENPU	139.913	144.194	141.659	141.076	147.629	142.587	149.114	152.397	156.043
ENSG00000134243.12	SORT1	152.458	144.307	143.845	147.652	142.423	131.52	141.412	140.564	144.646
ENSG00000149503.13	INCENP	140.681	142.036	141.379	154.228	155.059	146.689	156.472	146.691	146.274
ENSG00000122756.15	CNTFR	163.403	156.404	142.276	124.664	120.403	117.761	132.444	118.207	120.816
ENSG00000131507.11	NDFIP1	142.665	140.957	131.629	146.989	144.972	137.075	138.48	149.481	140.502
ENSG00000065328.17	MCM10	165.451	151.463	150.009	118.641	119.698	113.745	125.603	114.784	115.302
ENSG00000126883.17	NUP214	141.193	145.273	141.771	132.788	140.416	137.801	142.676	132.491	134.655
ENSG00000158864.13	NDUFS2	137.097	136.868	144.181	150.692	147.846	144.809	151.644	142.127	144.683
ENSG00000092621.13	PHGDH	158.026	156.915	148.552	110.905	117.257	105.84	108.818	111.91	109.9
ENSG00000123143.13	PKN1	141.769	149.191	133.366	144.281	144.158	134.041	133.479	146.522	134.914
ENSG00000151640.13	DPYSL4	153.162	149.873	142.108	129.085	129.352	125.923	126.581	131.097	130.437
ENSG00000054793.14	ATP9A	143.753	147.544	141.099	142.789	140.145	138.571	133.881	154.214	137.393
ENSG00000141867.19	BRD4	137.609	137.89	145.021	142.734	145.514	149.296	155.265	147.959	143.61
ENSG00000213064.10	SFT2D2	147.402	138.912	140.483	144.502	136.891	135.323	146.988	139.887	138.133
ENSG00000213585.11	VDAC1	155.082	152.599	157.462	122.178	124.254	117.548	119.338	121.292	119.632
ENSG00000244038.11	DDOST	144.649	145.727	137.737	140.911	132.335	131.093	126.696	141.958	143.24
ENSG00000077942.19	FBLN1	136.713	142.49	132.077	148.315	150.992	143.954	150.264	143.48	137.837
ENSG00000090889.12	KIF4A	127.176	128.349	134.823	168.43	161.622	158.525	164.923	154.045	158.226
ENSG00000231074.9	HCG18	143.497	145.727	133.478	144.613	152.836	163.738	153.138	145.635	153.86
ENSG00000197045.13	GMFB	144.073	141.241	144.237	139.308	141.392	141.903	130.317	137.098	141.168
ENSG00000230590.11	FTX	124.104	138.571	160.6	138.479	141.826	171.814	195.734	139.93	152.38
ENSG00000153560.12	UBP1	146.249	145.33	148.72	140.248	135.209	134.981	130.317	131.646	128.809
ENSG00000133812.17	SBF2	131.656	130.621	122.495	170.364	170.354	167.883	170.441	167.104	159.336
ENSG00000141298.19	SSH2	155.338	150.895	148.552	127.206	127.291	123.06	137.79	130.505	134.322
ENSG00000102316.17	MAGED2	133.321	137.492	134.038	146.105	137.27	135.622	136.18	147.156	150.53
ENSG00000143970.17	ASXL2	144.905	152.599	138.185	144.447	146.816	151.047	136.64	139.93	143.536
ENSG00000171681.12	ATF7IP	131.336	134.255	137.905	150.581	150.504	149.637	156.875	149.819	150.53
ENSG00000111786.9	SRSF9	141.769	140.559	135.383	143.508	135.48	138.442	140.434	141.028	142.389
ENSG00000123384.14	LRP1	131.272	131.132	134.319	161.633	161.242	171.686	150.322	163.977	158.337
ENSG00000100353.18	EIF3D	129.032	132.438	128.659	161.633	157.337	156.688	160.841	160.638	160.668
ENSG00000140319.11	SRP14	137.481	141.979	147.935	144.337	138.843	141.433	146.7	139.253	141.279
ENSG00000143379.12	SETDB1	123.4	132.04	134.711	158.096	154.409	162.883	164.175	160.004	162.038
ENSG00000138778.13	CENPE	130.888	143.626	135.327	125.328	165.69	196.768	161.818	194.743	183.722
ENSG00000105701.16	FKBP8	143.177	143.512	132.862	138.203	140.579	131.477	138.077	142.846	143.24
ENSG00000141380.14	SS18	128.264	131.984	139.026	154.504	160.049	155.235	156.53	153.158	154.119
ENSG00000156531.17	PHF6	143.433	137.095	141.435	141.408	141.609	140.109	140.262	135.069	135.876
ENSG00000183431.12	SF3A3	148.042	146.693	146.534	134.28	133.474	126.905	130.432	129.618	127.365
ENSG00000135250.17	SRPK2	135.177	139.878	136	147.763	148.931	145.877	150.839	146.649	150.382
ENSG00000171793.16	CTPS1	144.905	150.668	142.948	120.796	116.932	116.65	126.178	118.334	126.292
ENSG00000136937.13	NCBP1	142.409	145.727	143.116	132.069	131.467	130.367	121.579	126.237	129.29
ENSG00000103257.9	SLC7A5	178.892	184.629	158.246	77.2522	84.6075	72.8531	77.8338	78.9877	82.1104
ENSG00000023228.14	NDUFS1	144.841	141.013	133.702	144.281	137.704	134.554	142.734	135.154	136.394
ENSG00000105202.9	FBL	142.921	134.596	132.077	143.232	141.229	136.092	130.202	144.705	140.983
ENSG00000113387.12	SUB1	136.969	137.492	141.547	135.329	135.752	136.605	142.791	135.492	139.281
ENSG00000164323.14	CFAP97	137.033	139.026	143.845	139.584	142.856	142.758	142.504	142.169	140.798
ENSG00000185722.18	ANKFY1	147.786	147.317	150.625	125.714	129.948	122.333	121.464	120.658	124.405
ENSG00000196642.19	RABL6	143.305	148.34	151.802	121.294	130.274	121.821	128.65	123.363	126.921
ENSG00000197912.16	SPG7	128.2	133.914	149.785	135.44	141.501	154.808	161.933	137.986	144.609
ENSG00000198862.14	LTN1	136.521	144.705	146.31	140.137	140.362	146.219	125.431	141.831	136.838
ENSG00000198911.12	SREBF2	127.752	125.736	135.159	157.157	159.941	155.363	155.955	156.496	159.595
ENSG00000021776.11	AQR	138.121	144.762	138.801	141.076	136.999	140.921	135.606	136.887	138.614
ENSG00000076382.17	SPAG5	130.632	137.436	134.263	149.421	149.202	148.74	153.081	147.452	148.272
ENSG00000110090.13	CPT1A	155.722	147.999	138.241	133.395	138.463	136.861	124.109	126.068	126.625
ENSG00000121644.19	DESI2	149.066	139.594	140.595	134.28	136.728	123.615	120.315	129.871	125.774
ENSG00000147421.18	HMBOX1	134.089	132.211	127.93	153.344	149.582	152.158	149.977	146.776	145.941
ENSG00000173905.9	GOLIM4	142.281	143.228	148.888	135.44	140.307	140.579	134.628	134.731	141.612
ENSG00000160752.15	FDPS	132.489	133.063	140.258	143.618	134.83	137.972	139.285	140.31	145.978
ENSG00000126464.14	PRR12	145.033	144.535	141.099	121.128	133.799	131.349	140.492	127.209	121.149
ENSG00000113558.19	SKP1	133.897	135.221	146.198	135.882	142.477	132.93	136.64	133.337	133.878
ENSG00000186472.20	PCLO	154.506	150.157	136.616	126.543	135.535	137.246	126.293	122.94	127.551
ENSG00000113360.17	DROSHA	136.841	134.937	141.827	142.292	139.765	138.485	146.24	132.28	133.471
ENSG00000145675.15	PIK3R1	125.512	125.566	124.456	162.517	156.036	159.251	152.678	168.203	160.965
ENSG00000101182.15	PSMA7	144.969	148.34	133.646	123.117	117.908	108.489	110.083	122.391	120.409
ENSG00000154945.7	ANKRD40	132.489	138.912	131.461	144.005	138.409	137.844	142.791	140.141	145.978
ENSG00000017260.20	ATP2C1	143.113	140.957	139.978	138.092	140.579	133.528	130.087	140.183	135.062
ENSG00000204138.13	PHACTR4	145.417	137.152	138.409	143.508	139.874	138.571	138.307	134.055	139.984
ENSG00000162885.14	B3GALNT2	143.881	148.112	141.547	139.474	136.782	132.204	127.903	126.617	137.282
ENSG00000183207.14	RUVBL2	134.665	144.023	137.961	132.843	133.203	133.742	140.089	132.365	130.955
ENSG00000118260.15	CREB1	137.353	136.47	138.465	138.203	141.284	142.16	137.043	136.718	145.016
ENSG00000198963.11	RORB	161.674	154.814	153.987	112.176	121.488	108.874	117.383	111.403	120.816
ENSG00000173114.13	LRRN3	139.209	133.403	143.845	132.235	144.429	135.323	128.42	135.703	144.646
ENSG00000134001.15	EIF2S1	148.042	144.705	146.871	131.13	132.226	127.119	119.223	125.476	127.513
ENSG00000165533.19	TTC8	120.648	119.603	129.275	163.291	153.704	162.456	165.727	171.203	167.921
ENSG00000100596.7	SPTLC2	146.441	139.537	139.306	138.037	132.389	132.888	132.099	134.985	132.213
ENSG00000148143.13	ZNF462	131.08	134.028	136.504	153.454	152.619	151.774	140.837	146.142	141.834
ENSG00000119969.15	HELLS	141.769	141.354	151.634	122.399	119.372	122.718	174.867	112.755	124.22
ENSG00000035928.16	RFC1	144.009	138.06	140.651	135.44	134.667	138.613	132.214	141.028	134.026
ENSG00000163257.11	DCAF16	120.328	122.215	117.396	160.417	166.178	170.489	172.511	172.387	172.732
ENSG00000105486.14	LIG1	143.817	146.011	139.922	127.096	123.766	125.495	130.949	125.476	126.403
ENSG00000009335.18	UBE3C	137.289	140.673	141.996	140.248	137.162	140.408	136.985	129.068	133.545
ENSG00000143228.13	NUF2	119.944	125.282	134.431	155.444	158.91	158.226	157.162	154.13	165.664
ENSG00000118193.12	KIF14	127.688	130.621	133.142	153.012	167.208	176.685	144.401	158.947	164.517
ENSG00000144136.11	SLC20A1	146.249	135.732	141.491	128.312	127.725	119.77	125.661	122.053	126.477
ENSG00000159086.15	PAXBP1	133.897	132.495	137.289	143.342	144.972	152.714	143.251	147.706	146.052
ENSG00000119638.14	NEK9	130.184	134.482	132.638	144.834	140.199	136.349	139.859	138.155	141.02
ENSG00000108395.14	TRIM37	148.618	141.127	146.871	125.604	124.362	122.205	126.753	119.39	118.115
ENSG00000169180.12	XPO6	136.009	146.693	138.633	132.345	130.708	130.922	127.213	129.575	131.362
ENSG00000165185.15	KIAA1958	125.512	127.554	121.598	167.49	165.852	167.541	160.841	159.117	160.483
ENSG00000075413.19	MARK3	133.001	140.389	141.211	141.961	138.735	143.997	144.401	142.465	138.614
ENSG00000126070.20	AGO3	143.753	134.312	136.672	129.804	145.08	149.595	153.541	121.038	126.958
ENSG00000062194.16	GPBP1	137.225	134.198	136.28	145.994	148.931	143.356	133.191	146.48	144.683
ENSG00000109180.15	OCIAD1	136.649	132.835	136	143.729	140.09	140.493	133.076	143.733	143.795
ENSG00000130402.13	ACTN4	149.066	145.5	141.267	123.172	123.874	121.18	128.478	122.433	120.668
ENSG00000164715.6	LMTK2	138.185	133.119	135.944	143.066	139.928	136.819	144.631	133.633	134.396
ENSG00000137815.14	RTF1	141.129	136.3	138.241	145.829	138.029	136.178	140.492	144.367	140.835
ENSG00000160208.13	RRP1B	155.594	145.159	144.349	118.918	121.379	117.291	123.074	120.024	120.002
ENSG00000169992.10	NLGN2	133.577	131.245	144.013	143.011	144.212	143.954	133.709	138.577	139.762
ENSG00000113643.9	RARS1	134.537	131.586	142.556	139.584	136.945	140.109	133.939	130.843	136.727
ENSG00000103723.17	AP3B2	138.313	139.707	150.625	124.554	128.755	131.691	133.881	123.236	128.069
ENSG00000104331.9	BPNT2	140.809	140.616	141.323	130.025	136.131	122.889	133.076	129.364	126.366
ENSG00000114686.9	MRPL3	143.689	143.739	137.345	121.294	131.901	128.016	121.062	131.097	132.731
ENSG00000143322.21	ABL2	134.217	136.981	127.202	144.06	148.768	145.535	142.734	140.733	136.32
ENSG00000037749.13	MFAP3	133.833	138.685	131.461	135.329	139.06	134.298	127.558	133.675	137.837
ENSG00000160049.12	DFFA	149.706	141.07	139.418	127.096	123.982	123.872	124.626	122.306	125.7
ENSG00000144452.15	ABCA12	117.384	121.648	126.53	160.472	154.897	164.422	153.828	168.879	164.517
ENSG00000125755.19	SYMPK	136.009	138.571	136.504	133.064	132.877	133.058	144.918	132.449	131.51
ENSG00000144580.14	CNOT9	142.729	139.878	137.513	130.301	129.731	124.299	125.948	128.308	128.328
ENSG00000116871.15	MAP7D1	147.722	144.591	136.224	140.303	133.257	125.666	129.57	127.969	119.336
ENSG00000184014.9	DENND5A	134.537	129.939	127.818	145.718	145.514	141.562	141.584	143.015	145.46
ENSG00000100796.18	PPP4R3A	133.769	138.458	136.056	139.584	136.185	134.554	147.275	129.28	133.286
ENSG00000111142.14	METAP2	134.089	128.803	139.922	148.205	143.182	145.578	145.608	149.227	151.64
ENSG00000180398.13	MCFD2	139.465	144.251	131.965	132.898	131.359	133.486	129.57	124.631	130.918
ENSG00000125743.11	SNRPD2	131.272	133.801	126.081	145.055	136.891	126.863	134.054	140.099	135.432
ENSG00000141576.16	RNF157	141.385	137.606	141.043	134.501	130.328	127.888	124.511	128.603	131.14
ENSG00000151694.14	ADAM17	129.352	128.122	127.65	143.232	146.924	144.894	148.482	144.663	141.797
ENSG00000106028.11	SSBP1	138.569	134.255	134.15	139.584	130.762	133.4	136.353	132.196	140.613
ENSG00000213463.5	SYNJ2BP	126.856	129.825	137.176	139.529	141.88	147.287	145.838	137.859	141.464
ENSG00000123983.15	ACSL3	134.665	134.142	138.409	136.711	139.277	143.271	134.916	139.253	135.025
ENSG00000094975.14	SUCO	139.977	134.937	138.521	136.048	143.453	139.938	123.304	141.62	138.911
ENSG00000180008.9	SOCS4	149.258	146.125	149.336	122.565	124.471	128.956	109.968	119.517	123.295
ENSG00000133958.13	UNC79	127.624	129.939	130.676	151.189	151.317	150.748	147.62	145.593	147.051
ENSG00000123144.11	TRIR	141.321	133.176	129.78	139.695	132.931	128.486	143.768	138.577	131.954
ENSG00000159692.16	CTBP1	142.537	142.433	131.405	133.451	130.437	118.445	127.903	130.083	129.993
ENSG00000185359.14	HGS	135.561	134.255	139.866	121.57	123.06	130.623	124.511	130.97	131.288
ENSG00000108588.14	CCDC47	140.873	134.312	136.112	134.832	131.847	135.75	129.225	136.084	127.625
ENSG00000196235.14	SUPT5H	141.001	138.458	141.771	129.693	129.298	129.426	129.11	129.575	126.033
ENSG00000132382.15	MYBBP1A	140.873	146.522	143.34	122.509	114.654	114.557	119.797	119.094	122.222
ENSG00000055130.17	CUL1	138.697	138.515	141.603	131.019	126.043	127.803	125.603	129.787	125.996
ENSG00000122257.20	RBBP6	129.224	136.697	133.646	139.087	145.948	157.5	145.263	151.383	153.786
ENSG00000170275.15	CRTAP	136.457	138.003	130.34	141.629	135.643	128.572	127.098	140.352	136.875
ENSG00000180182.11	MED14	133.705	130.507	136.448	140.911	150.016	140.921	139.4	139.549	137.615
ENSG00000067840.12	PDZD4	133.897	133.744	134.094	128.975	132.552	126.777	125.661	130.632	132.953
ENSG00000141858.12	SAMD1	157.066	152.485	147.263	98.9138	105.38	94.4313	97.6085	104.852	96.9857
ENSG00000178913.8	TAF7	130.888	131.813	126.866	137.319	129.569	130.837	132.846	136.211	138.429
ENSG00000164654.16	MIOS	129.416	131.302	133.87	146.989	146.056	148.868	126.178	148.847	133.989
ENSG00000107372.13	ZFAND5	132.937	124.09	127.482	142.9	141.067	134.469	129.34	141.662	140.798
ENSG00000198563.14	DDX39B	125.064	127.781	138.409	141.795	138.246	143.484	134.571	146.184	155.821
ENSG00000153561.13	RMND5A	132.297	134.653	134.375	143.397	135.372	137.801	128.822	137.774	137.652
ENSG00000144895.12	EIF2A	127.624	119.205	126.81	154.062	152.619	151.218	152.391	158.736	153.86
ENSG00000198015.14	MRPL42	125.512	131.472	124.4	135.053	134.45	138.485	157.68	137.14	139.725
ENSG00000141562.18	NARF	125.576	124.657	133.31	145.994	139.06	144.04	144.918	143.902	141.501
ENSG00000196312.15	MFSD14C	133.129	139.48	141.603	146.602	138.735	136.22	137.962	125.138	131.288
ENSG00000198815.9	FOXJ3	127.496	132.495	131.629	147.376	143.399	140.75	141.009	138.366	144.165
ENSG00000152990.14	ADGRA3	138.697	135.505	131.909	131.351	135.643	134.084	135.778	133.675	134.433
ENSG00000166181.13	API5	142.089	137.095	135.663	130.522	132.335	127.888	122.902	133.802	130.918
ENSG00000134057.15	CCNB1	123.848	124.885	112.016	160.362	159.724	153.996	145.435	153.876	159.373
ENSG00000144354.14	CDCA7	137.609	138.174	139.754	114.165	126.532	120.282	120.832	122.433	127.439
ENSG00000148337.21	CIZ1	135.817	137.379	137.064	138.756	141.067	131.606	138.71	137.394	131.954
ENSG00000116237.16	ICMT	146.121	146.522	142.388	113.226	109.773	111.48	111.175	109.501	108.494
ENSG00000168172.9	HOOK3	135.881	134.426	131.965	139.253	152.51	140.878	133.881	128.984	134.174
ENSG00000115457.10	IGFBP2	138.121	138.799	130.844	127.98	127.942	119.513	128.075	128.984	127.847
ENSG00000275052.5	PPP4R3B	141.321	136.016	136.056	135.108	131.684	140.707	122.959	132.407	132.472
ENSG00000213281.5	NRAS	136.585	128.462	136.504	140.027	132.986	134.981	128.593	130.97	130.918
ENSG00000189180.16	ZNF33A	129.096	139.423	145.078	126.875	134.558	152.799	135.203	145.17	146.644
ENSG00000119314.16	PTBP3	145.161	136.924	135.159	127.759	130.437	127.931	132.272	130.505	128.513
ENSG00000071794.16	HLTF	137.801	128.69	133.198	138.092	142.802	143.57	141.182	138.07	143.536
ENSG00000107643.16	MAPK8	129.48	128.917	133.646	138.037	145.134	141.006	137.445	143.395	145.608
ENSG00000169554.22	ZEB2	117.384	122.159	123.56	150.194	153.758	164.721	156.07	151.087	150.567
ENSG00000132153.15	DHX30	141.513	134.482	128.491	125.051	126.586	124.256	127.098	126.997	132.25
ENSG00000149547.15	EI24	143.113	137.152	133.31	119.028	121.488	113.275	119.51	122.94	123.628
ENSG00000161800.13	RACGAP1	126.28	127.724	132.133	149.144	146.761	144.595	140.952	138.873	143.018
ENSG00000087448.11	KLHL42	135.753	143.228	140.539	123.117	120.349	118.915	112.152	117.911	119.78
ENSG00000143614.10	GATAD2B	136.521	129.03	135.551	137.761	130.708	136.648	162.508	135.577	135.654
ENSG00000198663.17	C6orf89	125.896	126.361	130.004	139.474	132.986	135.238	126.466	137.056	136.357
ENSG00000111667.14	USP5	134.793	133.574	128.883	130.356	130.057	127.461	129.512	132.491	128.439
ENSG00000122378.14	PRXL2A	134.409	133.801	134.094	133.837	125.826	125.666	129.627	127.04	127.476
ENSG00000198176.13	TFDP1	151.37	141.468	139.026	110.518	117.962	107.592	110.83	109.29	111.565
ENSG00000115020.17	PIKFYVE	131.592	131.756	132.918	138.921	145.677	148.441	128.535	135.408	133.693
ENSG00000101350.8	KIF3B	130.824	134.539	133.982	130.467	128.104	135.195	117.441	134.055	129.734
ENSG00000118873.16	RAB3GAP2	132.361	128.292	129.387	140.634	134.233	138.4	124.684	134.858	135.136
ENSG00000101161.8	PRPF6	135.689	131.416	126.081	131.793	130.599	128.657	132.272	131.435	128.624
ENSG00000054267.22	ARID4B	130.696	127.554	130.844	138.59	153.161	155.833	136.468	145.043	144.461
ENSG00000086475.15	SEPHS1	133.449	135.845	129.331	133.119	124.579	119.086	128.305	128.984	130.511
ENSG00000172115.9	CYCS	142.601	134.369	133.198	119.415	109.719	106.994	116.118	115.713	120.187
ENSG00000138834.14	MAPK8IP3	130.824	141.297	143.509	117.37	118.776	116.052	120.315	120.7	122.629
ENSG00000008735.14	MAPK8IP2	144.713	133.574	130.732	126.82	128.159	124.128	121.867	120.531	119.447
ENSG00000160716.6	CHRNB2	140.169	138.003	134.15	130.854	126.315	119.812	116.578	121.377	117.486
ENSG00000186566.13	GPATCH8	124.232	126.475	131.685	137.595	139.602	142.843	154.231	144.367	139.651
ENSG00000070018.9	LRP6	131.208	123.692	121.43	137.208	139.44	146.561	152.908	148.889	149.567
ENSG00000143420.19	ENSA	129.032	131.586	122.943	136.158	129.406	134.426	141.929	138.493	131.991
ENSG00000062725.10	APPBP2	130.184	136.243	126.642	140.745	140.85	140.493	130.087	131.477	133.841
ENSG00000182095.14	TNRC18	124.68	131.018	122.047	147.542	151.968	145.023	148.942	144.79	137.504
ENSG00000101654.18	RNMT	123.592	133.574	127.987	141.574	144.809	143.912	129.742	144.705	141.168
ENSG00000163938.17	GNL3	130.952	134.71	137.345	121.017	124.199	134.127	132.272	129.575	130.215
ENSG00000125868.16	DSTN	130.824	132.04	133.758	128.643	130.003	120.24	120.947	122.137	126.403
ENSG00000162738.6	VANGL2	133.193	127.611	128.211	136.766	137.813	131.392	135.261	135.196	132.065
ENSG00000142875.19	PRKACB	132.937	130.734	128.995	138.203	138.355	138.912	124.454	134.562	132.879
ENSG00000177732.9	SOX12	126.408	122.783	126.754	141.242	136.24	137.759	140.722	134.055	135.321
ENSG00000213160.10	KLHL23	120.264	119.83	129.556	145.994	138.246	150.748	147.217	143.818	142.426
ENSG00000163428.4	LRRC58	139.785	134.198	136.616	123.725	127.996	128.615	114.796	120.954	120.076
ENSG00000116580.19	GON4L	129.48	122.84	129.612	139.363	140.47	146.304	149.574	133.21	133.249
ENSG00000203875.13	SNHG5	122.824	134.142	121.206	134.722	134.83	136.007	131.007	137.352	145.497
ENSG00000131653.13	TRAF7	127.432	126.475	126.361	132.788	130.653	125.154	132.904	130.674	132.176
ENSG00000168259.17	DNAJC7	130.632	132.665	140.651	127.648	127.671	122.248	137.1	132.491	130.622
ENSG00000159202.18	UBE2Z	128.904	130.677	135.663	124.001	123.711	124.812	126.236	128.477	128.92
ENSG00000198604.11	BAZ1A	130.568	131.984	129.724	130.467	136.511	141.134	131.754	140.775	142.611
ENSG00000050438.17	SLC4A8	129.032	131.132	127.426	139.253	133.528	126.564	134.686	120.827	133.952
ENSG00000103546.18	SLC6A2	163.083	162.821	147.487	84.8779	90.3564	84.0054	82.8925	83.8901	85.3297
ENSG00000136231.14	IGF2BP3	131.784	121.023	129.107	137.429	142.423	142.202	146.413	142.254	145.608
ENSG00000141580.16	WDR45B	134.153	131.188	136.84	127.041	124.145	122.077	123.994	128.646	129.105
ENSG00000028528.15	SNX1	120.648	122.215	126.249	148.813	143.073	153.483	137.618	145.931	149.79
ENSG00000130826.18	DKC1	136.201	134.596	138.801	120.686	120.511	122.889	123.994	121.123	126.366
ENSG00000078177.14	N4BP2	132.105	131.643	116.611	128.477	140.524	146.433	131.524	135.365	136.579
ENSG00000103202.13	NME4	125.96	128.917	131.629	125.549	124.796	124.384	126.466	126.617	126.477
ENSG00000137770.14	CTDSPL2	127.304	128.69	128.435	126.322	132.226	130.281	143.309	132.914	135.58
ENSG00000005249.13	PRKAR2B	135.433	133.801	128.491	123.559	120.023	122.761	124.741	117.066	122
ENSG00000103549.22	RNF40	142.345	137.89	129.612	125.217	121.216	120.197	122.959	122.813	120.113
ENSG00000132155.13	RAF1	131.016	130.109	130.116	133.451	136.511	134.169	129.685	138.366	135.839
ENSG00000153395.10	LPCAT1	147.273	143.399	145.806	103.721	106.844	101.781	101.058	105.317	108.05
ENSG00000082805.20	ERC1	130.12	128.406	131.181	131.296	131.792	123.444	136.065	128.561	123.924
ENSG00000163029.16	SMC6	133.961	147.942	143.957	115.713	125.935	133.528	118.188	129.618	127.402
ENSG00000125835.19	SNRPB	142.473	143.853	128.659	116.32	109.664	106.438	97.551	114.995	122
ENSG00000077254.14	USP33	123.848	129.485	129.107	135.219	138.843	138.571	129.857	134.309	131.436
ENSG00000162129.14	CLPB	135.753	128.633	122.551	126.709	129.406	122.077	134.341	125.56	123.924
ENSG00000166963.13	MAP1A	140.937	145.557	138.465	110.463	107.332	105.028	104.564	99.7384	99.983
ENSG00000203880.12	PCMTD2	121.544	118.013	125.969	145.884	147.9	148.142	144.803	148.002	145.053
ENSG00000162664.17	ZNF326	135.433	134.369	138.801	122.123	123.06	129.597	124.684	124.969	128.032
ENSG00000162378.13	ZYG11B	131.977	130.677	130.956	132.456	136.077	128.102	124.741	127.674	127.402
ENSG00000196233.14	LCOR	130.504	127.611	119.245	135.053	142.206	137.502	125.086	139.591	134.174
ENSG00000116675.16	DNAJC6	131.4	135.618	126.922	129.085	126.586	127.034	122.499	126.533	123.85
ENSG00000185896.11	LAMP1	144.969	135.789	132.245	118.144	116.932	111.096	115.141	118.207	118.633
ENSG00000120875.9	DUSP4	134.665	135.789	135.215	118.918	118.071	118.531	118.188	117.7	118.744
ENSG00000166012.17	TAF1D	130.952	127.27	143.565	110.187	115.684	119.257	126.351	129.237	131.954
ENSG00000163625.16	WDFY3	129.608	129.201	108.486	140.634	142.965	141.177	138.135	136.211	136.283
ENSG00000116030.17	SUMO1	137.097	133.801	128.491	128.698	120.023	122.462	125.661	125.56	124.22
ENSG00000126067.12	PSMB2	137.673	134.994	128.547	115.16	122.572	110.54	122.039	117.615	117.856
ENSG00000170248.15	PDCD6IP	126.536	128.519	132.974	131.848	128.864	130.11	122.557	136.464	132.953
ENSG00000170776.22	AKAP13	129.672	131.132	128.323	131.24	128.159	130.58	133.709	132.449	129.771
ENSG00000166582.10	CENPV	127.176	134.142	127.034	118.807	122.247	120.881	126.121	124.377	128.217
ENSG00000112290.13	WASF1	123.08	128.235	126.025	133.23	139.982	132.118	135.606	135.027	139.281
ENSG00000145604.17	SKP2	132.105	134.766	133.254	123.836	123.928	121.522	117.153	120.658	121.741
ENSG00000143061.18	IGSF3	119.24	125.964	118.685	141.353	137.541	140.792	127.558	135.661	135.506
ENSG00000003756.17	RBM5	127.688	121.704	133.254	130.577	125.393	134.853	142.791	133.041	139.947
ENSG00000153922.11	CHD1	140.169	135.902	135.888	121.791	131.142	137.374	117.613	128.138	128.291
ENSG00000198730.9	CTR9	134.729	136.697	133.366	123.449	122.03	125.068	121.809	118.63	124.701
ENSG00000160352.16	ZNF714	128.2	129.087	132.918	124.941	126.965	132.717	126.983	124.927	129.771
ENSG00000090686.16	USP48	127.752	128.406	132.525	133.782	133.365	136.391	128.65	127.631	129.068
ENSG00000109572.14	CLCN3	127.24	130.677	125.017	129.527	130.382	131.093	127.845	128.223	132.398
ENSG00000075856.12	SART3	132.553	123.351	128.379	130.467	125.121	128.016	125.316	124.166	128.032
ENSG00000048991.16	R3HDM1	128.328	134.994	131.068	128.367	128.159	128.828	129.685	120.109	126.588
ENSG00000103222.20	ABCC1	126.984	129.087	125.017	139.584	132.986	136.605	138.307	134.816	131.695
ENSG00000070061.16	ELP1	129.352	128.576	129.948	122.565	121	123.487	115.429	120.658	126.255
ENSG00000157193.18	LRP8	131.144	138.855	133.814	114.331	115.088	121.693	120.43	115.206	118.041
ENSG00000136156.15	ITM2B	126.984	120.966	122.215	139.971	134.938	127.504	136.065	134.224	134.359
ENSG00000169230.10	PRELID1	132.617	131.643	121.71	129.914	116.281	115.625	121.464	120.109	118.337
ENSG00000109920.13	FNBP4	124.744	121.818	141.267	132.18	131.901	144.638	142.676	135.45	139.762
ENSG00000139163.16	ETNK1	136.265	134.937	135.944	120.078	130.653	128.444	113.244	115.418	116.153
ENSG00000107929.15	LARP4B	130.76	131.813	129.443	123.615	119.915	120.368	131.294	122.518	124.072
ENSG00000143179.16	UCK2	127.432	129.825	130.676	128.256	122.789	118.061	136.985	127.166	126.773
ENSG00000088448.14	ANKRD10	131.592	131.472	128.603	126.267	130.545	134.34	128.88	128.477	130.289
ENSG00000085872.15	CHERP	134.793	134.823	135.944	118.31	121.813	118.103	120.66	119.432	121.741
ENSG00000170445.16	HARS1	129.096	128.974	134.038	122.454	120.078	128.444	122.672	122.264	124.072
ENSG00000186487.20	MYT1L	118.216	117.275	118.18	149.421	153.053	155.192	161.876	141.451	147.939
ENSG00000138398.17	PPIG	134.409	134.312	136.448	115.16	127.399	141.433	121.12	140.141	136.468
ENSG00000165934.13	CPSF2	132.745	138.571	131.068	122.786	121.325	118.061	123.419	123.955	123.628
ENSG00000177302.15	TOP3A	129.352	126.929	123.055	129.196	129.46	124.085	126.236	119.728	122.925
ENSG00000164733.22	CTSB	141.833	133.063	127.706	116.818	115.739	107.079	114.221	113.769	118.485
ENSG00000185009.13	AP3M1	128.136	129.882	135.495	126.543	122.247	122.59	124.914	123.278	122.111
ENSG00000155380.13	SLC16A1	131.08	125.453	129.163	133.064	127.128	124.256	129.857	125.518	125.626
ENSG00000004864.14	SLC25A13	130.312	131.018	125.409	128.312	125.989	118.317	121.005	127.335	126.995
ENSG00000128534.8	LSM 8.00	129.8	124.657	132.75	130.743	123.386	134.127	131.582	129.913	128.106
ENSG00000180957.18	PITPNB	131.72	127.27	130.172	128.809	128.918	130.367	136.238	126.279	127.884
ENSG00000130119.17	GNL3L	123.016	120.057	118.012	122.399	126.423	130.409	153.368	115.713	124.22
ENSG00000103994.18	ZNF106	131.913	128.462	127.65	130.688	121.976	119.898	119.338	119.94	116.709
ENSG00000101150.18	TPD52L2	131.208	132.495	138.409	115.16	120.078	121.308	113.991	116.601	114.229
ENSG00000070047.13	PHRF1	131.336	127.213	134.599	120.465	121.596	119.77	131.812	122.602	116.45
ENSG00000136709.12	WDR33	131.72	133.631	133.422	112.618	118.45	115.582	123.246	117.869	118.67
ENSG00000197961.12	ZNF121	125	126.872	128.939	133.727	126.857	124	148.022	143.268	134.026
ENSG00000105993.15	DNAJB6	135.689	132.04	133.87	124.167	118.776	122.333	121.407	117.066	116.635
ENSG00000178662.16	CSRNP3	138.121	135.732	123.392	124.278	129.026	121.564	109.91	113.093	120.409
ENSG00000036257.13	CUL3	125.448	123.408	131.965	132.732	129.894	130.623	131.352	130.336	124.479
ENSG00000138688.16	KIAA1109	124.424	123.919	110.391	131.461	139.223	146.262	125.718	141.24	138.985
ENSG00000109654.16	TRIM2	126.024	125.964	126.025	135.716	131.521	131.093	127.73	132.365	129.771
ENSG00000197119.13	SLC25A29	117.128	122.84	128.211	140.69	142.585	142.202	128.478	150.326	146.866
ENSG00000164163.11	ABCE1	142.601	141.07	135.271	108.197	111.237	111.822	107.898	119.644	113.637
ENSG00000178921.14	PFAS	135.049	134.653	137.12	112.894	120.023	108.874	109.795	113.347	112.231
ENSG00000041357.16	PSMA4	132.169	129.939	131.237	118.697	113.786	117.548	124.454	120.024	122.518
ENSG00000168653.11	NDUFS5	132.617	130.393	131.405	121.846	116.118	117.505	124.856	116.559	117.523
ENSG00000179134.15	SAMD4B	129.672	132.154	124.624	128.919	133.419	128.059	131.064	128.857	130.178
ENSG00000149806.11	FAU	125.832	130.848	118.236	125.438	124.525	120.282	110.083	127.42	127.254
ENSG00000136811.16	ODF2	127.24	133.801	133.758	125.383	124.525	124.256	126.236	119.813	125.589
ENSG00000159409.15	CELF3	124.36	123.067	130.844	128.975	137.596	133.101	136.238	135.112	130.659
ENSG00000182986.14	ZNF320	126.856	127.27	135.719	127.427	131.25	132.204	120.027	131.604	129.29
ENSG00000185900.11	POMK	137.097	132.835	123.336	110.96	109.502	96.1832	167.912	106.035	121.334
ENSG00000197894.11	ADH5	125.064	124.998	121.374	135.606	125.718	130.537	131.467	132.111	137.43
ENSG00000116747.13	RO60	128.264	131.984	132.077	119.083	132.823	134.853	116.751	125.772	122.888
ENSG00000165733.8	BMS1	131.272	127.383	132.918	121.68	116.173	123.188	124.339	124.631	120.89
ENSG00000176915.15	ANKLE2	127.176	128.803	130.676	118.862	119.698	125.709	129.742	121.165	121.815
ENSG00000001167.14	NFYA	136.073	134.369	132.021	117.591	114.057	117.12	109.508	111.741	113.119
ENSG00000033178.13	UBA6	128.84	126.816	132.638	126.378	130.382	131.435	133.651	132.238	131.436
ENSG00000187257.16	RSBN1L	137.225	130.961	130.452	118.641	122.789	120.624	120.717	116.347	117.671
ENSG00000055044.11	NOP58	127.56	132.211	131.293	116.762	119.047	124.47	121.12	122.433	123.221
ENSG00000128245.15	YWHAH	121.928	130.45	127.65	127.372	117.312	122.034	116.693	123.405	124.035
ENSG00000121152.10	NCAPH	127.496	129.655	127.538	127.704	120.511	117.163	126.466	116.812	121.63
ENSG00000174243.10	DDX23	132.425	133.176	140.37	119.304	113.678	112.335	119.797	113.178	115.302
ENSG00000091140.14	DLD	123.272	125.566	130.788	120.796	122.41	126.735	122.844	130.294	120.298
ENSG00000088888.18	MAVS	128.328	125.623	121.991	126.599	127.182	122.59	131.064	125.603	127.365
ENSG00000128881.17	TTBK2	119.944	117.615	119.133	150.636	144.267	143.997	129.57	135.196	133.508
ENSG00000117505.13	DR1	124.232	118.297	120.534	130.577	132.606	127.333	141.756	125.814	126.921
ENSG00000130939.20	UBE4B	123.784	122.386	124.512	133.727	135.263	130.367	127.328	127.843	122.777
ENSG00000008018.9	PSMB1	126.28	125.225	125.185	126.212	122.193	115.924	116.636	123.025	122.629
ENSG00000129083.13	COPB1	123.784	126.872	122.439	129.196	125.718	119.257	123.706	125.18	123.924
ENSG00000143294.15	PRCC	135.369	126.134	122.551	122.288	122.518	116.01	123.246	120.616	120.631
ENSG00000110514.19	MADD	130.12	129.087	127.258	116.707	114.925	118.018	115.659	113.896	114.784
ENSG00000089916.18	GPATCH2L	123.08	120.398	113.529	136.324	141.501	140.493	118.935	135.196	130.437
ENSG00000175203.17	DCTN2	116.295	124.374	126.081	134.998	135.372	137.759	134.283	133.421	138.022
ENSG00000266074.10	BAHCC1	112.967	112.618	124.512	139.474	144.104	147.415	145.435	136.887	140.243
ENSG00000158615.9	PPP1R15B	126.792	136.3	129.387	120.299	115.196	118.445	117.038	112.163	113.489
ENSG00000074356.17	NCBP3	119.112	123.181	130.116	130.854	126.477	130.067	130.375	128.899	125.959
ENSG00000004455.17	AK2	134.921	130.393	128.211	110.242	111.346	117.676	119.453	112.755	113.045
ENSG00000105819.14	PMPCB	112.327	113.924	115.21	135.937	141.392	137.673	141.871	144.452	142.537
ENSG00000072110.15	ACTN1	134.665	127.44	125.857	133.672	123.006	127.119	123.189	119.137	115.117
ENSG00000166526.18	ZNF3	116.744	114.492	122.887	130.19	124.688	133.614	144.286	135.069	136.024
ENSG00000134910.14	STT3A	136.969	136.016	132.245	113.834	109.068	104.259	101.058	105.571	103.239
ENSG00000170852.11	KBTBD2	124.808	116.536	119.805	135.329	131.142	132.076	133.996	134.9	136.468
ENSG00000143624.14	INTS3	124.168	124.374	140.427	117.978	116.986	119.129	113.417	114.868	117.042
ENSG00000100941.9	PNN	129.864	126.588	132.245	117.591	121.867	126.777	127.098	125.222	130.215
ENSG00000100722.20	ZC3H14	130.824	126.361	130.844	123.283	123.332	127.034	121.579	117.742	114.562
ENSG00000144560.15	VGLL4	123.656	123.976	120.197	132.401	130.979	126.735	123.936	128.308	132.694
ENSG00000072803.18	FBXW11	125.896	120.285	121.094	129.251	128.701	124.769	124.109	128.899	126.107
ENSG00000132694.19	ARHGEF11	129.8	128.008	126.249	118.586	119.861	117.249	115.026	115.713	117.893
ENSG00000162714.12	ZNF496	121.736	119.319	121.038	134.003	133.908	133.101	136.64	135.703	130.844
ENSG00000162434.13	JAK1	123.784	121.875	125.409	125.438	116.064	122.205	123.074	123.743	114.562
ENSG00000099956.20	SMARCB1	123.208	127.156	119.637	128.035	122.952	120.112	131.984	120.405	125.515
ENSG00000160803.8	UBQLN4	130.504	132.381	132.862	118.254	111.291	108.361	110.485	113.516	116.301
ENSG00000133612.19	AGAP3	135.881	130.223	128.547	114.663	116.552	113.873	119.165	114.53	119.854
ENSG00000135916.16	ITM2C	119.176	118.126	112.128	143.895	136.891	139.041	130.03	138.915	132.361
ENSG00000108344.15	PSMD3	131.592	131.87	123.784	118.254	113.949	112.378	111.232	118.376	117.227
ENSG00000171533.12	MAP6	127.24	132.722	127.706	116.983	117.8	120.154	116.636	118.587	114.303
ENSG00000104549.12	SQLE	121.864	117.672	128.603	116.21	120.62	115.924	117.211	118.63	115.635
ENSG00000062650.20	WAPL	123.144	124.09	125.017	128.477	132.606	129.726	129.512	129.11	127.328
ENSG00000164944.12	VIRMA	119.048	119.092	121.374	131.517	135.101	130.922	128.65	132.322	131.399
ENSG00000155111.15	CDK19	103.303	107.45	108.71	155.499	157.717	152.5	146.01	160.3	150.197
ENSG00000088882.8	CPXM1	115.847	119.66	129.443	120.962	125.013	123.487	118.705	127.42	122.888
ENSG00000146535.14	GNA12	134.601	132.438	121.823	113.502	111.888	107.378	106.461	114.615	109.419
ENSG00000141510.18	TP53	124.808	124.146	124.792	126.212	123.223	120.112	122.844	120.109	116.412
ENSG00000115866.11	DARS1	120.136	114.833	114.762	136.766	135.914	142.331	138.537	142.296	134.84
ENSG00000198728.11	LDB1	115.655	117.445	119.469	130.246	131.738	133.742	135.088	132.069	132.361
ENSG00000117016.10	RIMS3	126.152	126.475	119.637	118.862	125.067	119.171	111.865	125.983	122.555
ENSG00000182534.13	MXRA7	134.857	126.134	126.361	114.663	107.929	101.994	113.647	106.712	109.493
ENSG00000107331.17	ABCA2	119.432	117.388	122.719	123.504	129.298	124.085	119.453	125.053	127.069
ENSG00000175175.6	PPM1E	126.92	123.067	126.474	123.725	122.898	125.068	121.579	121.081	120.964
ENSG00000166532.16	RIMKLB	118.728	120.001	133.814	121.073	125.013	127.632	121.407	126.279	126.514
ENSG00000133243.10	BTBD2	127.304	126.248	117.059	121.736	122.03	117.761	126.753	124.715	122.999
ENSG00000172531.16	PPP1CA	131.977	126.418	125.969	110.187	114.003	109.515	115.026	116.474	115.894
ENSG00000196865.4	NHLRC2	117.32	120.285	116.275	123.228	125.935	130.196	133.766	128.561	127.254
ENSG00000108671.11	PSMD11	134.473	132.665	122.383	110.684	113.84	99.8152	114.221	108.149	118.448
ENSG00000013275.8	PSMC4	124.488	127.781	125.465	114.552	112.213	105.584	112.727	111.065	112.49
ENSG00000133169.6	BEX1	119.688	119.433	125.185	126.985	116.986	118.787	122.384	122.137	118.818
ENSG00000084652.16	TXLNA	124.616	125.509	125.241	119.636	112.81	114.685	119.338	113.6	112.527
ENSG00000125651.14	GTF2F1	127.048	120.398	116.555	134.611	120.62	124.983	136.41	127.209	121.741
ENSG00000143183.18	TMCO1	123.4	124.487	128.603	118.752	114.871	111.737	111.635	115.671	118.263
ENSG00000157637.13	SLC38A10	123.72	128.065	140.707	122.675	123.223	124.214	115.888	115.333	115.265
ENSG00000164061.5	BSN	131.464	123.124	126.922	116.818	123.332	119.086	123.017	115.375	112.453
ENSG00000097021.20	ACOT7	126.6	128.86	120.141	107.589	111.779	100.328	107.151	110.557	109.16
ENSG00000101098.13	RIMS4	141.513	137.492	129.499	102.727	101.366	100.456	99.448	108.74	101.463
ENSG00000165672.7	PRDX3	128.136	127.27	125.689	113.668	117.366	104.302	102.15	116.77	120.187
ENSG00000106299.8	WASL	128.776	123.124	124.176	126.543	130.111	124.427	127.673	120.447	119.817
ENSG00000166747.13	AP1G1	128.072	121.25	120.366	121.902	123.386	123.615	121.982	117.488	122.407
ENSG00000101158.15	NELFCD	121.032	121.988	130.116	116.541	116.661	115.54	116.578	115.925	120.705
ENSG00000123066.9	MED13L	111.495	118.978	113.305	131.738	138.626	134.169	139.744	137.183	129.66
ENSG00000102572.15	STK24	125.064	128.065	124.905	120.189	118.179	111.309	117.441	123.743	117.153
ENSG00000155827.12	RNF20	121.864	123.635	118.853	130.411	121.922	125.239	126.236	126.363	128.106
ENSG00000169926.11	KLF13	128.84	123.522	113.585	123.891	124.471	118.189	107.036	126.49	122.703
ENSG00000007392.17	LUC7L	116.103	118.467	133.982	110.85	114.654	121.992	131.467	111.699	120.779
ENSG00000160293.17	VAV2	136.329	131.756	129.948	101.842	102.234	98.8324	101.517	98.7241	101.944
ENSG00000143147.14	GPR161	124.296	123.919	123.167	124.886	123.711	118.146	123.361	120.658	120.224
ENSG00000077380.16	DYNC1I2	124.936	118.808	122.159	126.267	128.376	129.469	128.535	128.561	124.442
ENSG00000034053.14	APBA2	124.36	127.213	128.883	121.515	117.257	119.727	112.842	121.207	118.892
ENSG00000114978.18	MOB1A	128.648	129.428	122.943	118.31	122.41	118.573	120.487	117.488	122.37
ENSG00000133703.13	KRAS	117.64	114.037	125.969	129.251	133.203	134.212	123.936	129.618	130.511
ENSG00000234420.7	ZNF37BP	110.407	116.366	134.375	131.903	132.118	147.757	133.651	138.831	133.027
ENSG00000139645.11	ANKRD52	134.473	130.223	136.168	110.352	107.549	105.114	101.517	102.19	103.498
ENSG00000110344.10	UBE4A	117.96	120.001	116.667	125.825	123.332	126.051	121.177	124.039	123.739
ENSG00000144224.17	UBXN4	114.631	116.934	123.167	131.959	138.626	135.152	123.419	128.477	135.506
ENSG00000180660.8	MAB21L1	105.991	103.588	112.296	139.253	148.443	134.511	149.229	153.707	146.2
ENSG00000079616.13	KIF22	120.072	119.376	116.219	125.217	124.091	120.71	133.249	122.813	126.033
ENSG00000070770.10	CSNK2A2	121.416	114.889	120.254	134.666	130.057	133.657	134.686	123.785	124.442
ENSG00000183808.11	RBM12B	123.4	122.215	112.577	128.035	135.101	130.965	120.372	129.364	126.699
ENSG00000133863.9	TEX15	132.105	136.243	121.71	91.8406	110.532	122.761	105.944	112.417	114.599
ENSG00000152492.15	CCDC50	116.295	115.23	115.21	126.267	131.901	128.657	133.134	132.491	134.655
ENSG00000108262.16	GIT1	129.608	131.643	124.624	111.458	117.149	107.036	109.22	113.262	109.493
ENSG00000139726.11	DENR	130.376	127.724	132.638	112.839	112.485	105.242	106.576	105.697	108.272
ENSG00000188636.4	RTL6	120.328	126.134	119.357	128.477	122.301	121.906	119.797	119.475	121.297
ENSG00000158604.15	TMED4	126.664	123.749	116.947	120.686	123.603	120.197	117.038	126.913	124.849
ENSG00000140105.18	WARS1	135.817	140.332	127.987	87.8067	84.9329	85.6291	87.4337	89.3842	89.8811
ENSG00000092847.13	AGO1	117	124.203	123.504	123.449	123.386	120.923	124.971	116.939	114.673
ENSG00000140332.17	TLE3	125.256	116.423	117.003	124.333	126.532	116.736	131.582	123.743	123.961
ENSG00000114850.7	SSR3	133.769	128.406	123.055	107.534	108.363	106.31	111.52	103.162	112.046
ENSG00000059588.10	TARBP1	105.543	107.904	117.732	128.533	134.992	139.938	130.202	139.718	141.168
ENSG00000132676.16	DAP3	117.768	116.934	119.469	127.704	122.084	126.307	128.305	129.322	124.997
ENSG00000148358.20	GPR107	115.719	118.922	115.995	129.085	133.582	128.999	123.476	136.041	129.438
ENSG00000039319.17	ZFYVE16	123.592	121.704	124.176	124.775	125.555	131.52	115.429	119.01	121.556
ENSG00000052841.15	TTC17	114.759	114.037	117.508	135.882	135.155	140.792	136.008	129.618	131.473
ENSG00000130935.10	NOL11	128.776	123.522	125.465	114.718	109.61	107.976	108.588	110.811	111.713
ENSG00000168495.13	POLR3D	118.856	119.433	115.939	127.925	132.552	124.299	126.925	132.491	127.291
ENSG00000124164.16	VAPB	123.144	117.956	128.827	124.664	122.138	113.659	120.66	119.517	120.224
ENSG00000187189.11	TSPYL4	126.6	117.786	123.84	114.331	111.942	108.233	109.22	117.193	118.374
ENSG00000166783.22	MARF1	114.375	111.652	116.499	132.788	125.338	130.025	130.375	131.055	131.547
ENSG00000125991.20	ERGIC3	120.392	116.707	111.792	124.83	121.379	122.034	116.866	127.758	129.623
ENSG00000158195.11	WASF2	118.728	124.771	117.059	127.98	128.809	119.642	124.051	125.349	121.112
ENSG00000159593.15	NAE1	122.248	118.07	126.754	115.27	110.695	114.514	118.188	119.644	125.256
ENSG00000067596.12	DHX8	113.543	115.06	114.09	133.174	130.165	127.675	132.157	127.631	132.287
ENSG00000186318.17	BACE1	138.889	132.779	128.379	105.379	106.898	99.687	104.162	103.626	99.1689
ENSG00000164934.14	DCAF13	124.04	121.534	127.314	117.315	120.891	120.838	113.532	117.784	124.331
ENSG00000141646.14	SMAD4	117.768	115.173	115.49	122.786	127.508	117.89	143.423	116.432	121.778
ENSG00000135365.16	PHF21A	111.687	115.344	114.706	137.374	135.101	144.253	136.87	133.844	133.249
ENSG00000009413.16	REV3L	116.872	122.215	107.757	117.757	136.294	139.981	121.867	134.985	138.985
ENSG00000151692.15	RNF144A	116.488	117.161	118.909	126.985	124.904	125.666	124.224	123.828	125.219
ENSG00000144231.11	POLR2D	126.088	120.966	120.534	116.431	115.196	117.591	123.132	113.812	112.601
ENSG00000204842.18	ATXN2	126.024	120.568	126.866	117.702	119.698	125.965	134.973	108.994	107.532
ENSG00000136536.15	MARCHF7	123.08	115.798	123.279	129.417	126.64	129.042	120.487	121.968	116.968
ENSG00000157500.12	APPL1	121.992	122.215	124.512	122.675	120.457	125.495	120.89	120.743	121.149
ENSG00000108669.16	CYTH1	117.448	118.751	120.254	124.554	125.121	126.435	125.373	121.672	127.18
ENSG00000075539.15	FRYL	121.544	115.968	109.214	129.804	132.66	128.786	123.361	128.941	134.063
ENSG00000180817.12	PPA1	118.536	117.104	115.154	131.24	116.823	119.214	119.395	119.263	123.961
ENSG00000135679.25	MDM2	119.688	117.956	121.935	119.36	127.291	129.555	121.235	117.277	123.295
ENSG00000177479.20	ARIH2	123.656	118.638	130.844	115.16	110.912	111.352	111.347	112.079	115.635
ENSG00000187742.15	SECISBP2	114.183	117.388	111.4	121.736	134.775	127.589	129.742	131.012	131.769
ENSG00000104067.17	TJP1	118.344	119.887	124.4	121.791	125.989	119.727	120.027	116.897	122.296
ENSG00000139842.15	CUL4A	125.832	123.124	126.866	115.989	118.342	115.839	112.095	113.093	115.043
ENSG00000165238.16	WNK2	126.984	130.109	118.348	105.6	108.851	109.857	105.771	105.021	107.606
ENSG00000106144.20	CASP2	123.208	122.386	120.534	111.734	115.034	110.327	121.522	112.459	114.821
ENSG00000011451.21	WIZ	117.96	120.909	118.965	113.613	125.826	113.659	114.854	116.221	120.52
ENSG00000138771.16	SHROOM3	122.056	117.047	119.861	126.543	127.779	120.71	118.36	120.996	120.15
ENSG00000167088.11	SNRPD1	125.896	121.136	121.823	120.354	118.288	112.207	113.359	122.94	119.854
ENSG00000204442.4	FAM155A	123.464	117.672	120.814	123.394	123.766	127.974	126.006	136.041	131.991
ENSG00000169217.9	CD2BP2	119.048	117.786	118.853	120.686	116.606	116.095	118.533	123.194	117.671
ENSG00000095564.14	BTAF1	117.512	114.662	115.715	123.449	127.671	132.033	124.224	134.266	131.325
ENSG00000104885.18	DOT1L	121.48	122.329	136.784	107.479	118.993	112.207	111.75	108.106	108.198
ENSG00000075711.21	DLG1	122.184	116.025	120.982	115.491	121.705	125.239	125.776	121.207	118.596
ENSG00000092051.17	JPH4	124.168	124.771	128.883	109.192	113.732	111.779	109.335	108.191	105.571
ENSG00000053438.11	NNAT	127.88	128.349	123.279	103.224	110.207	97.3369	107.956	107.219	102.98
ENSG00000120800.5	UTP20	133.769	134.369	131.909	102.948	98.9257	91.3976	96.3438	97.7943	97.7998
ENSG00000144674.16	GOLGA4	125.512	140.105	126.305	95.1009	112.918	131.093	117.9	127.378	123.443
ENSG00000189339.12	SLC35E2B	114.183	113.186	118.797	125.935	128.701	123.744	118.993	126.744	125.589
ENSG00000172775.17	PSME3IP1	115.271	120.966	111.512	122.012	119.969	122.12	123.074	123.955	125.293
ENSG00000181192.12	DHTKD1	115.399	115.06	115.883	127.759	121.433	121.949	125.086	126.406	125.108
ENSG00000087053.20	MTMR2	121.928	119.489	119.301	119.581	121.325	115.369	119.165	115.798	117.93
ENSG00000165417.12	GTF2A1	123.208	116.139	121.767	120.796	131.25	119.898	128.822	119.221	122.185
ENSG00000173674.11	EIF1AX	125.192	127.213	122.271	113.557	116.878	106.695	103.357	113.347	113.415
ENSG00000115977.21	AAK1	122.952	119.205	116.051	122.675	126.532	124.769	125.661	110.896	114.969
ENSG00000136448.13	NMT1	123.464	124.09	122.159	113.834	116.118	111.053	113.819	111.191	110.455
ENSG00000211460.12	TSN	120.712	120.398	120.366	116.818	117.42	112.463	107.668	119.179	118.744
ENSG00000039123.16	MTREX	122.504	124.09	122.439	115.436	117.366	116.351	114.624	119.517	117.412
ENSG00000130522.6	JUND	115.015	114.605	111.12	122.454	120.728	109.857	120.947	130.336	125.774
ENSG00000015171.20	ZMYND11	124.104	122.67	123.055	116.155	113.623	120.154	114.451	113.516	114.118
ENSG00000147874.11	HAUS6	124.104	119.944	128.659	119.249	123.874	122.248	118.935	117.024	127.921
ENSG00000147133.16	TAF1	115.847	119.092	125.073	124.664	126.532	128.486	121.464	127.758	120.52
ENSG00000198369.10	SPRED2	118.664	112.05	113.585	132.014	126.26	128.486	129.167	128.646	123.628
ENSG00000021574.13	SPAST	116.167	123.294	120.926	121.625	122.301	116.608	107.611	120.32	119.706
ENSG00000124006.15	OBSL1	118.664	120.796	126.474	108.197	105.759	108.703	104.507	109.247	110.529
ENSG00000146670.10	CDCA5	120.968	126.248	119.469	111.789	107.766	105.028	107.381	108.994	109.049
ENSG00000101773.19	RBBP8	132.745	131.7	126.361	102.45	109.447	107.848	103.299	108.909	110.64
ENSG00000085719.13	CPNE3	116.039	117.786	116.387	119.249	123.115	122.291	115.141	118.165	120.187
ENSG00000180900.20	SCRIB	122.824	122.443	117.732	106.761	103.807	102.806	103.702	106.374	107.754
ENSG00000104660.19	LEPROTL1	122.184	118.41	119.357	124.388	116.39	113.873	117.498	115.713	115.931
ENSG00000077279.20	DCX	100.358	104.78	104.675	153.565	147.141	159.807	139.63	162.117	153.231
ENSG00000178691.11	SUZ12	122.312	118.978	124.12	109.247	119.047	114.984	113.991	121.63	121.186
ENSG00000033867.16	SLC4A7	118.408	121.534	124.905	117.536	125.121	121.479	124.626	114.446	118.448
ENSG00000155755.19	TMEM237	123.208	126.929	117.396	108.032	108.797	108.147	114.049	113.981	110.64
ENSG00000115183.15	TANC1	109.703	107.79	106.861	134.777	137.433	139.382	146.413	135.027	142.278
ENSG00000182010.11	RTKN2	120.2	118.978	122.439	122.067	126.803	120.667	108.588	117.193	118.263
ENSG00000143368.10	SF3B4	124.296	127.043	116.219	110.684	112.051	106.994	113.359	110.684	112.564
ENSG00000105221.18	AKT2	114.951	111.027	118.628	117.205	119.21	121.735	116.003	120.616	123.221
ENSG00000169057.24	MECP2	122.376	120.852	121.43	115.713	111.237	109.643	117.958	110.811	109.678
ENSG00000196323.14	ZBTB44	112.583	117.445	120.366	127.372	131.738	129.256	121.924	129.364	127.328
ENSG00000205726.15	ITSN1	124.424	116.82	120.197	120.575	117.528	123.573	117.441	121.63	119.151
ENSG00000179387.10	ELMOD2	113.415	114.321	119.581	119.691	127.508	121.735	111.75	119.728	121.371
ENSG00000141252.21	VPS53	119.88	123.408	121.991	108.474	109.502	112.976	114.164	108.529	108.346
ENSG00000110400.11	NECTIN1	121.672	118.808	109.887	125.825	122.681	122.974	117.268	134.351	122.111
ENSG00000130749.10	ZC3H4	109.383	114.094	118.909	129.914	128.376	124.897	130.547	123.616	125.034
ENSG00000120727.13	PAIP2	106.567	105.859	108.654	131.075	130.762	131.136	132.501	134.14	127.847
ENSG00000178982.10	EIF3K	115.143	117.672	111.008	117.868	113.081	115.839	118.418	120.109	122.185
ENSG00000119787.14	ATL2	116.936	114.833	113.865	125.825	122.193	120.453	115.774	119.728	123.036
ENSG00000205269.6	TMEM170B	111.623	115.344	117.844	131.793	135.806	134.212	120.775	128.265	124.331
ENSG00000116161.18	CACYBP	132.489	128.803	126.025	94.7141	96.7562	96.7814	106.576	93.061	99.687
ENSG00000073921.18	PICALM	120.648	118.297	120.085	119.415	119.101	119.727	113.072	115.756	115.339
ENSG00000122515.15	ZMIZ2	111.303	113.753	132.581	106.816	113.19	121.436	119.625	113.304	116.264
[truncated: 15,374 more rows]
