# Supplementary material for: Ladostigil Attenuates Induced Oxidative Stress in Human Neuroblast-like SH-SY5Y Cells
Source: Biomedicines. 2021 Sep 17;9(9):1251. doi: 10.3390/biomedicines9091251 (PMC8471141; doi:10.3390/biomedicines9091251)
Supplement: Supplementary file 1 [file biomedicines-09-01251-s001.zip › BioMed-Lado-Supp Table S2 (sin1_Lado_24h.Vs.sin1) FINAL.xlsx]

## Sheet: DE
Table S2. DE results of (filtratdby 5 CPM) gene list following ladostigil (24 hrs) versus cell treatd with Sin1 (24 hrs).
ensemblID	Description	Gene_type	gene_name	logFC	logCPM	LR	PValue	FDR	color
ENSG00000000003	protein_coding	tetraspanin 6 [Source:HGNC Symbol;Acc:HGNC:11858]	TSPAN6	0.0428577	4.2732	0.299546	0.584167	0.980546	Unchanged
ENSG00000000419	protein_coding	dolichyl-phosphate mannosyltransferase subunit 1, catalytic [Source:HGNC Symbol;Acc:HGNC:3005]	DPM1	-0.0428603	5.53318	0.608974	0.435174	0.964137	Unchanged
ENSG00000000457	protein_coding	SCY1 like pseudokinase 3 [Source:HGNC Symbol;Acc:HGNC:19285]	SCYL3	0.0549142	4.62856	0.760026	0.38332	0.94856	Unchanged
ENSG00000000460	protein_coding	chromosome 1 open reading frame 112 [Source:HGNC Symbol;Acc:HGNC:25565]	C1orf112	-0.139995	6.09815	9.0456	0.00263327	0.31266	Unchanged
ENSG00000001036	protein_coding	alpha-L-fucosidase 2 [Source:HGNC Symbol;Acc:HGNC:4008]	FUCA2	-0.0304204	4.86545	0.231307	0.630556	0.980546	Unchanged
ENSG00000001084	protein_coding	glutamate-cysteine ligase catalytic subunit [Source:HGNC Symbol;Acc:HGNC:4311]	GCLC	-0.0270518	5.57331	0.337203	0.561448	0.98022	Unchanged
ENSG00000001167	protein_coding	nuclear transcription factor Y subunit alpha [Source:HGNC Symbol;Acc:HGNC:7804]	NFYA	-0.0606431	6.97552	2.21362	0.136797	0.863426	Unchanged
ENSG00000001460	protein_coding	sperm tail PG-rich repeat containing 1 [Source:HGNC Symbol;Acc:HGNC:28070]	STPG1	-0.0551866	3.44593	0.366705	0.544806	0.9778	Unchanged
ENSG00000001461	protein_coding	NIPA like domain containing 3 [Source:HGNC Symbol;Acc:HGNC:25233]	NIPAL3	-0.0997093	3.87646	2.06849	0.15037	0.866096	Unchanged
ENSG00000001497	protein_coding	LAS1 like ribosome biogenesis factor [Source:HGNC Symbol;Acc:HGNC:25726]	LAS1L	0.0160805	6.55215	0.162033	0.687292	0.986097	Unchanged
ENSG00000001617	protein_coding	semaphorin 3F [Source:HGNC Symbol;Acc:HGNC:10728]	SEMA3F	-0.0279313	1.94529	0.0372674	0.846922	0.998123	Unchanged
ENSG00000001629	protein_coding	ankyrin repeat and IBR domain containing 1 [Source:HGNC Symbol;Acc:HGNC:22215]	ANKIB1	-0.0914192	7.50617	6.88131	0.00871015	0.463684	Unchanged
ENSG00000001630	protein_coding	cytochrome P450 family 51 subfamily A member 1 [Source:HGNC Symbol;Acc:HGNC:2649]	CYP51A1	0.001196	2.02869	6.02334e-05	0.993808	0.999523	Unchanged
ENSG00000001631	protein_coding	KRIT1 ankyrin repeat containing [Source:HGNC Symbol;Acc:HGNC:1573]	KRIT1	0.0275533	4.6591	0.205003	0.650713	0.982638	Unchanged
ENSG00000002016	protein_coding	RAD52 homolog, DNA repair protein [Source:HGNC Symbol;Acc:HGNC:9824]	RAD52	-0.0956879	3.76409	1.25568	0.26247	0.912292	Unchanged
ENSG00000002330	protein_coding	BCL2 associated agonist of cell death [Source:HGNC Symbol;Acc:HGNC:936]	BAD	-0.052039	4.11525	0.420622	0.516627	0.973159	Unchanged
ENSG00000002549	protein_coding	leucine aminopeptidase 3 [Source:HGNC Symbol;Acc:HGNC:18449]	LAP3	0.0363005	5.41919	0.455608	0.499684	0.972467	Unchanged
ENSG00000002822	protein_coding	mitotic arrest deficient 1 like 1 [Source:HGNC Symbol;Acc:HGNC:6762]	MAD1L1	-0.0669969	0.105248	0.0424296	0.836803	0.996176	Unchanged
ENSG00000002834	protein_coding	LIM and SH3 protein 1 [Source:HGNC Symbol;Acc:HGNC:6513]	LASP1	-0.0264298	6.42429	0.400847	0.526652	0.97327	Unchanged
ENSG00000002919	protein_coding	sorting nexin 11 [Source:HGNC Symbol;Acc:HGNC:14975]	SNX11	-0.0438284	4.45707	0.486015	0.485711	0.971573	Unchanged
ENSG00000003056	protein_coding	mannose-6-phosphate receptor, cation dependent [Source:HGNC Symbol;Acc:HGNC:6752]	M6PR	0.0348211	6.12655	0.63213	0.426575	0.959463	Unchanged
ENSG00000003096	protein_coding	kelch like family member 13 [Source:HGNC Symbol;Acc:HGNC:22931]	KLHL13	-0.0290604	7.65845	0.59072	0.442141	0.965512	Unchanged
ENSG00000003147	protein_coding	islet cell autoantigen 1 [Source:HGNC Symbol;Acc:HGNC:5343]	ICA1	0.0268741	8.00173	0.349713	0.554276	0.979393	Unchanged
ENSG00000003249	protein_coding	dysbindin domain containing 1 [Source:HGNC Symbol;Acc:HGNC:28455]	DBNDD1	0.00132719	5.69412	0.000603979	0.980393	0.999244	Unchanged
ENSG00000003393	protein_coding	alsin Rho guanine nucleotide exchange factor ALS2 [Source:HGNC Symbol;Acc:HGNC:443]	ALS2	-0.0244893	6.21091	0.351037	0.553527	0.979022	Unchanged
ENSG00000003402	protein_coding	CASP8 and FADD like apoptosis regulator [Source:HGNC Symbol;Acc:HGNC:1876]	CFLAR	-0.0948986	4.01001	1.39275	0.237941	0.906186	Unchanged
ENSG00000003509	protein_coding	NADH:ubiquinone oxidoreductase complex assembly factor 7 [Source:HGNC Symbol;Acc:HGNC:28816]	NDUFAF7	0.0581884	5.33214	1.05412	0.304561	0.925788	Unchanged
ENSG00000003756	protein_coding	RNA binding motif protein 5 [Source:HGNC Symbol;Acc:HGNC:9902]	RBM5	0.0861738	7.01207	4.55893	0.0327476	0.655759	Unchanged
ENSG00000003987	protein_coding	myotubularin related protein 7 [Source:HGNC Symbol;Acc:HGNC:7454]	MTMR7	0.059707	4.64273	0.964043	0.32617	0.933855	Unchanged
ENSG00000003989	protein_coding	solute carrier family 7 member 2 [Source:HGNC Symbol;Acc:HGNC:11060]	SLC7A2	0.102426	4.28162	1.69393	0.193084	0.886286	Unchanged
ENSG00000004059	protein_coding	ADP ribosylation factor 5 [Source:HGNC Symbol;Acc:HGNC:658]	ARF5	0.00786162	6.43924	0.0228717	0.879791	0.998208	Unchanged
ENSG00000004139	protein_coding	sterile alpha and TIR motif containing 1 [Source:HGNC Symbol;Acc:HGNC:17074]	SARM1	0.0250516	6.86112	0.413213	0.520343	0.97327	Unchanged
ENSG00000004142	protein_coding	DNA polymerase delta interacting protein 2 [Source:HGNC Symbol;Acc:HGNC:23781]	POLDIP2	0.0199643	6.3171	0.207137	0.649021	0.982638	Unchanged
ENSG00000004399	protein_coding	plexin D1 [Source:HGNC Symbol;Acc:HGNC:9107]	PLXND1	-0.170459	4.0606	5.01865	0.0250757	0.621597	Unchanged
ENSG00000004455	protein_coding	adenylate kinase 2 [Source:HGNC Symbol;Acc:HGNC:362]	AK2	0.0201032	6.9627	0.268059	0.604637	0.980546	Unchanged
ENSG00000004468	protein_coding	CD38 molecule [Source:HGNC Symbol;Acc:HGNC:1667]	CD38	0.00278041	-0.996572	5.73058e-05	0.99396	0.999523	Unchanged
ENSG00000004478	protein_coding	FKBP prolyl isomerase 4 [Source:HGNC Symbol;Acc:HGNC:3720]	FKBP4	-0.0648687	7.85309	2.8608	0.0907621	0.813921	Unchanged
ENSG00000004487	protein_coding	lysine demethylase 1A [Source:HGNC Symbol;Acc:HGNC:29079]	KDM1A	-0.00291335	8.63708	0.00862843	0.925991	0.998208	Unchanged
ENSG00000004534	protein_coding	RNA binding motif protein 6 [Source:HGNC Symbol;Acc:HGNC:9903]	RBM6	-0.00981536	7.53679	0.0336667	0.854418	0.998208	Unchanged
ENSG00000004660	protein_coding	calcium/calmodulin dependent protein kinase kinase 1 [Source:HGNC Symbol;Acc:HGNC:1469]	CAMKK1	-0.122467	3.21275	1.31525	0.251447	0.91002	Unchanged
ENSG00000004700	protein_coding	RecQ like helicase [Source:HGNC Symbol;Acc:HGNC:9948]	RECQL	0.0257513	6.04019	0.26932	0.603788	0.980546	Unchanged
ENSG00000004766	protein_coding	VPS50 subunit of EARP/GARPII complex [Source:HGNC Symbol;Acc:HGNC:25956]	VPS50	0.00295052	5.71684	0.00245301	0.960499	0.998791	Unchanged
ENSG00000004776	protein_coding	heat shock protein family B (small) member 6 [Source:HGNC Symbol;Acc:HGNC:26511]	HSPB6	0.916777	-1.34586	3.42434	0.0642417	0.772646	Unchanged
ENSG00000004777	protein_coding	Rho GTPase activating protein 33 [Source:HGNC Symbol;Acc:HGNC:23085]	ARHGAP33	0.120936	5.27407	3.95063	0.0468538	0.712598	Unchanged
ENSG00000004779	protein_coding	NADH:ubiquinone oxidoreductase subunit AB1 [Source:HGNC Symbol;Acc:HGNC:7694]	NDUFAB1	0.0209021	5.63119	0.15814	0.690874	0.986442	Unchanged
ENSG00000004799	protein_coding	pyruvate dehydrogenase kinase 4 [Source:HGNC Symbol;Acc:HGNC:8812]	PDK4	0.120624	-0.00571468	0.346634	0.556025	0.979393	Unchanged
ENSG00000004838	protein_coding	zinc finger MYND-type containing 10 [Source:HGNC Symbol;Acc:HGNC:19412]	ZMYND10	0.13002	0.891708	0.33222	0.564355	0.980269	Unchanged
ENSG00000004864	protein_coding	solute carrier family 25 member 13 [Source:HGNC Symbol;Acc:HGNC:10983]	SLC25A13	0.0137549	6.99891	0.126872	0.721698	0.990007	Unchanged
ENSG00000004866	protein_coding	suppression of tumorigenicity 7 [Source:HGNC Symbol;Acc:HGNC:11351]	ST7	0.0777714	4.91686	1.83766	0.175225	0.87779	Unchanged
ENSG00000004897	protein_coding	cell division cycle 27 [Source:HGNC Symbol;Acc:HGNC:1728]	CDC27	-0.0468816	7.45341	1.75731	0.18496	0.882388	Unchanged
ENSG00000004961	protein_coding	holocytochrome c synthase [Source:HGNC Symbol;Acc:HGNC:4837]	HCCS	0.0547397	4.39408	0.732489	0.392078	0.952462	Unchanged
ENSG00000004975	protein_coding	dishevelled segment polarity protein 2 [Source:HGNC Symbol;Acc:HGNC:3086]	DVL2	0.0104766	5.93591	0.0514169	0.820616	0.996176	Unchanged
ENSG00000005007	protein_coding	UPF1 RNA helicase and ATPase [Source:HGNC Symbol;Acc:HGNC:9962]	UPF1	0.0463025	7.15249	1.31354	0.251754	0.91002	Unchanged
ENSG00000005020	protein_coding	src kinase associated phosphoprotein 2 [Source:HGNC Symbol;Acc:HGNC:15687]	SKAP2	0.0720065	1.62082	0.219035	0.639776	0.981605	Unchanged
ENSG00000005022	protein_coding	solute carrier family 25 member 5 [Source:HGNC Symbol;Acc:HGNC:10991]	SLC25A5	0.00169768	7.59768	0.00199106	0.964409	0.998791	Unchanged
ENSG00000005059	protein_coding	mitochondrial calcium uniporter dominant negative subunit beta [Source:HGNC Symbol;Acc:HGNC:26076]	MCUB	0.0758853	3.53098	0.788883	0.374438	0.947966	Unchanged
ENSG00000005075	protein_coding	RNA polymerase II subunit J [Source:HGNC Symbol;Acc:HGNC:9197]	POLR2J	0.0502174	4.59128	0.551051	0.457888	0.969572	Unchanged
ENSG00000005100	protein_coding	DEAH-box helicase 33 [Source:HGNC Symbol;Acc:HGNC:16718]	DHX33	-0.0449867	6.80762	1.48978	0.222251	0.901346	Unchanged
ENSG00000005108	protein_coding	thrombospondin type 1 domain containing 7A [Source:HGNC Symbol;Acc:HGNC:22207]	THSD7A	-0.0352315	6.65411	0.705975	0.400783	0.953579	Unchanged
ENSG00000005156	protein_coding	DNA ligase 3 [Source:HGNC Symbol;Acc:HGNC:6600]	LIG3	0.0841315	6.82941	3.29866	0.0693366	0.782824	Unchanged
ENSG00000005175	protein_coding	RNA polymerase II associated protein 3 [Source:HGNC Symbol;Acc:HGNC:26151]	RPAP3	0.0241206	5.78513	0.221665	0.637774	0.981605	Unchanged
ENSG00000005189	protein_coding	RNA exonuclease 5 [Source:HGNC Symbol;Acc:HGNC:24661]	REXO5	0.110972	4.43024	3.09385	0.0785885	0.787018	Unchanged
ENSG00000005194	protein_coding	cytokine induced apoptosis inhibitor 1 [Source:HGNC Symbol;Acc:HGNC:28050]	CIAPIN1	0.00989231	5.65477	0.0346342	0.852364	0.998208	Unchanged
ENSG00000005206	protein_coding	signal peptide peptidase like 2B [Source:HGNC Symbol;Acc:HGNC:30627]	SPPL2B	0.0226293	5.10976	0.0963999	0.756193	0.992257	Unchanged
ENSG00000005238	protein_coding	family with sequence similarity 214 member B [Source:HGNC Symbol;Acc:HGNC:25666]	FAM214B	-0.183751	3.47083	4.30295	0.0380462	0.677599	Unchanged
ENSG00000005243	protein_coding	COPI coat complex subunit zeta 2 [Source:HGNC Symbol;Acc:HGNC:19356]	COPZ2	-0.0983081	0.132034	0.155085	0.693723	0.986517	Unchanged
ENSG00000005249	protein_coding	protein kinase cAMP-dependent type II regulatory subunit beta [Source:HGNC Symbol;Acc:HGNC:9392]	PRKAR2B	-0.0122678	7.02674	0.0947346	0.758242	0.992515	Unchanged
ENSG00000005302	protein_coding	MSL complex subunit 3 [Source:HGNC Symbol;Acc:HGNC:7370]	MSL3	0.0136469	5.33006	0.0626875	0.802298	0.995667	Unchanged
ENSG00000005339	protein_coding	CREB binding protein [Source:HGNC Symbol;Acc:HGNC:2348]	CREBBP	-0.0221007	7.74101	0.315585	0.574273	0.980546	Unchanged
ENSG00000005379	protein_coding	TSPO associated protein 1 [Source:HGNC Symbol;Acc:HGNC:16831]	TSPOAP1	0.0356865	4.72699	0.258776	0.610962	0.980546	Unchanged
ENSG00000005436	protein_coding	GC-rich sequence DNA-binding factor 2 [Source:HGNC Symbol;Acc:HGNC:1317]	GCFC2	-0.0614344	4.63678	0.810456	0.367986	0.945863	Unchanged
ENSG00000005448	protein_coding	WD repeat domain 54 [Source:HGNC Symbol;Acc:HGNC:25770]	WDR54	0.0292228	4.86943	0.235698	0.627331	0.980546	Unchanged
ENSG00000005469	protein_coding	carnitine O-octanoyltransferase [Source:HGNC Symbol;Acc:HGNC:2366]	CROT	-0.0463764	4.50901	0.481774	0.48762	0.971573	Unchanged
ENSG00000005471	protein_coding	ATP binding cassette subfamily B member 4 [Source:HGNC Symbol;Acc:HGNC:45]	ABCB4	-0.0422152	2.97641	0.160385	0.688802	0.986442	Unchanged
ENSG00000005483	protein_coding	lysine methyltransferase 2E (inactive) [Source:HGNC Symbol;Acc:HGNC:18541]	KMT2E	-0.190745	7.77345	24.125	9.02796e-07	0.00175901	Unchanged
ENSG00000005486	protein_coding	rhomboid domain containing 2 [Source:HGNC Symbol;Acc:HGNC:23082]	RHBDD2	0.109732	5.9671	3.88767	0.048642	0.716377	Unchanged
ENSG00000005700	protein_coding	inhibitor of Bruton tyrosine kinase [Source:HGNC Symbol;Acc:HGNC:17853]	IBTK	-0.0804611	6.44531	2.50939	0.11317	0.837211	Unchanged
ENSG00000005801	protein_coding	zinc finger protein 195 [Source:HGNC Symbol;Acc:HGNC:12986]	ZNF195	0.00225242	7.31849	0.00208754	0.963558	0.998791	Unchanged
ENSG00000005810	protein_coding	MYC binding protein 2 [Source:HGNC Symbol;Acc:HGNC:23386]	MYCBP2	-0.0407676	7.37733	0.843975	0.358262	0.944807	Unchanged
ENSG00000005812	protein_coding	F-box and leucine rich repeat protein 3 [Source:HGNC Symbol;Acc:HGNC:13599]	FBXL3	-0.0279186	5.08884	0.276563	0.598963	0.980546	Unchanged
ENSG00000005882	protein_coding	pyruvate dehydrogenase kinase 2 [Source:HGNC Symbol;Acc:HGNC:8810]	PDK2	-0.0694096	4.61432	1.06345	0.30243	0.925788	Unchanged
ENSG00000005884	protein_coding	integrin subunit alpha 3 [Source:HGNC Symbol;Acc:HGNC:6139]	ITGA3	-0.0172825	3.74444	0.0471792	0.828046	0.996176	Unchanged
ENSG00000005889	protein_coding	zinc finger protein X-linked [Source:HGNC Symbol;Acc:HGNC:12869]	ZFX	-0.0289771	6.30303	0.43434	0.509867	0.973159	Unchanged
ENSG00000005893	protein_coding	lysosomal associated membrane protein 2 [Source:HGNC Symbol;Acc:HGNC:6501]	LAMP2	0.0160745	5.42558	0.0978764	0.754393	0.992257	Unchanged
ENSG00000005961	protein_coding	integrin subunit alpha 2b [Source:HGNC Symbol;Acc:HGNC:6138]	ITGA2B	0.163023	1.66848	0.840882	0.359145	0.944807	Unchanged
ENSG00000006007	protein_coding	glycerophosphodiester phosphodiesterase 1 [Source:HGNC Symbol;Acc:HGNC:29644]	GDE1	0.0459262	5.64828	0.909625	0.340214	0.93918	Unchanged
ENSG00000006015	protein_coding	required for excision 1-B domain containing [Source:HGNC Symbol;Acc:HGNC:26098]	REX1BD	-0.0169638	4.35363	0.0526693	0.818482	0.996176	Unchanged
ENSG00000006025	protein_coding	oxysterol binding protein like 7 [Source:HGNC Symbol;Acc:HGNC:16387]	OSBPL7	0.114897	3.93419	1.80228	0.179437	0.879851	Unchanged
ENSG00000006042	protein_coding	transmembrane protein 98 [Source:HGNC Symbol;Acc:HGNC:24529]	TMEM98	0.0339389	6.25347	0.610939	0.434435	0.964044	Unchanged
ENSG00000006047	protein_coding	Y-box binding protein 2 [Source:HGNC Symbol;Acc:HGNC:17948]	YBX2	-0.0791239	3.83434	0.820082	0.365156	0.945863	Unchanged
ENSG00000006062	protein_coding	mitogen-activated protein kinase kinase kinase 14 [Source:HGNC Symbol;Acc:HGNC:6853]	MAP3K14	-0.213072	2.88242	3.8762	0.0489754	0.71782	Unchanged
ENSG00000006071	protein_coding	ATP binding cassette subfamily C member 8 [Source:HGNC Symbol;Acc:HGNC:59]	ABCC8	0.0247435	1.96825	0.0279085	0.867324	0.998208	Unchanged
ENSG00000006118	protein_coding	transmembrane protein 132A [Source:HGNC Symbol;Acc:HGNC:31092]	TMEM132A	0.0482752	6.82944	0.828672	0.362657	0.945863	Unchanged
ENSG00000006125	protein_coding	adaptor related protein complex 2 subunit beta 1 [Source:HGNC Symbol;Acc:HGNC:563]	AP2B1	-0.0351749	8.68838	1.07525	0.299763	0.925776	Unchanged
ENSG00000006194	protein_coding	zinc finger protein 263 [Source:HGNC Symbol;Acc:HGNC:13056]	ZNF263	0.044563	5.53172	0.70321	0.401707	0.954255	Unchanged
ENSG00000006210	protein_coding	C-X3-C motif chemokine ligand 1 [Source:HGNC Symbol;Acc:HGNC:10647]	CX3CL1	0.0192595	3.59102	0.0533705	0.817299	0.996176	Unchanged
ENSG00000006282	protein_coding	spermatogenesis associated 20 [Source:HGNC Symbol;Acc:HGNC:26125]	SPATA20	0.0988849	5.0364	3.55321	0.0594303	0.758062	Unchanged
ENSG00000006283	protein_coding	calcium voltage-gated channel subunit alpha1 G [Source:HGNC Symbol;Acc:HGNC:1394]	CACNA1G	-0.0929329	4.55412	1.82926	0.176215	0.877873	Unchanged
ENSG00000006327	protein_coding	TNF receptor superfamily member 12A [Source:HGNC Symbol;Acc:HGNC:18152]	TNFRSF12A	-0.301774	0.714995	1.48815	0.222504	0.901346	Unchanged
ENSG00000006377	protein_coding	distal-less homeobox 6 [Source:HGNC Symbol;Acc:HGNC:2919]	DLX6	0.0433074	4.0772	0.368768	0.543677	0.977095	Unchanged
ENSG00000006432	protein_coding	mitogen-activated protein kinase kinase kinase 9 [Source:HGNC Symbol;Acc:HGNC:6861]	MAP3K9	-0.111847	5.4722	6.13186	0.0132767	0.527503	Unchanged
ENSG00000006451	protein_coding	RAS like proto-oncogene A [Source:HGNC Symbol;Acc:HGNC:9839]	RALA	-0.0185526	7.29472	0.263878	0.607469	0.980546	Unchanged
ENSG00000006453	protein_coding	BAR/IMD domain containing adaptor protein 2 like 1 [Source:HGNC Symbol;Acc:HGNC:21649]	BAIAP2L1	0.0134298	4.41819	0.03363	0.854496	0.998208	Unchanged
ENSG00000006459	protein_coding	lysine demethylase 7A [Source:HGNC Symbol;Acc:HGNC:22224]	KDM7A	-0.0502588	6.37458	1.36286	0.243042	0.90687	Unchanged
ENSG00000006468	protein_coding	ETS variant transcription factor 1 [Source:HGNC Symbol;Acc:HGNC:3490]	ETV1	0.0135688	4.94424	0.0626995	0.802279	0.995667	Unchanged
ENSG00000006530	protein_coding	acylglycerol kinase [Source:HGNC Symbol;Acc:HGNC:21869]	AGK	0.0466218	5.7216	0.994493	0.318647	0.932223	Unchanged
ENSG00000006534	protein_coding	aldehyde dehydrogenase 3 family member B1 [Source:HGNC Symbol;Acc:HGNC:410]	ALDH3B1	0.267643	-1.49188	0.314257	0.575079	0.980546	Unchanged
ENSG00000006576	protein_coding	putative homeodomain transcription factor 2 [Source:HGNC Symbol;Acc:HGNC:13411]	PHTF2	-0.0763209	6.76555	3.89764	0.0483539	0.715572	Unchanged
ENSG00000006607	protein_coding	FERM, ARH/RhoGEF and pleckstrin domain protein 2 [Source:HGNC Symbol;Acc:HGNC:16460]	FARP2	-0.0492376	6.41215	1.06004	0.303205	0.925788	Unchanged
ENSG00000006625	protein_coding	gamma-glutamylcyclotransferase [Source:HGNC Symbol;Acc:HGNC:21705]	GGCT	-0.0791947	5.61016	2.42509	0.119406	0.845918	Unchanged
ENSG00000006634	protein_coding	DBF4 zinc finger [Source:HGNC Symbol;Acc:HGNC:17364]	DBF4	-0.0663733	6.49594	2.28995	0.130214	0.855003	Unchanged
ENSG00000006638	protein_coding	thromboxane A2 receptor [Source:HGNC Symbol;Acc:HGNC:11608]	TBXA2R	-0.25993	0.435651	0.838673	0.359777	0.944807	Unchanged
ENSG00000006652	protein_coding	interferon related developmental regulator 1 [Source:HGNC Symbol;Acc:HGNC:5456]	IFRD1	0.0176667	4.66262	0.0533764	0.817289	0.996176	Unchanged
ENSG00000006695	protein_coding	cytochrome c oxidase assembly factor heme A:farnesyltransferase COX10 [Source:HGNC Symbol;Acc:HGNC:2260]	COX10	0.0193886	4.089	0.0608453	0.805165	0.996127	Unchanged
ENSG00000006704	protein_coding	GTF2I repeat domain containing 1 [Source:HGNC Symbol;Acc:HGNC:4661]	GTF2IRD1	0.0100607	6.30491	0.0474823	0.827504	0.996176	Unchanged
ENSG00000006712	protein_coding	PAF1 homolog, Paf1/RNA polymerase II complex component [Source:HGNC Symbol;Acc:HGNC:25459]	PAF1	0.0245071	5.82824	0.260297	0.609916	0.980546	Unchanged
ENSG00000006715	protein_coding	VPS41 subunit of HOPS complex [Source:HGNC Symbol;Acc:HGNC:12713]	VPS41	0.00402199	7.22713	0.0120467	0.912602	0.998208	Unchanged
ENSG00000006740	protein_coding	Rho GTPase activating protein 44 [Source:HGNC Symbol;Acc:HGNC:29096]	ARHGAP44	0.192659	-1.10935	0.136571	0.711714	0.98813	Unchanged
ENSG00000006744	protein_coding	elaC ribonuclease Z 2 [Source:HGNC Symbol;Acc:HGNC:14198]	ELAC2	0.0247154	6.1019	0.290037	0.590197	0.980546	Unchanged
ENSG00000006756	protein_coding	arylsulfatase D [Source:HGNC Symbol;Acc:HGNC:717]	ARSD	0.0211751	4.7002	0.128529	0.719963	0.989832	Unchanged
ENSG00000006757	protein_coding	patatin like phospholipase domain containing 4 [Source:HGNC Symbol;Acc:HGNC:24887]	PNPLA4	0.079695	1.67566	0.235583	0.627415	0.980546	Unchanged
ENSG00000006831	protein_coding	adiponectin receptor 2 [Source:HGNC Symbol;Acc:HGNC:24041]	ADIPOR2	0.00747064	6.3857	0.0267408	0.870104	0.998208	Unchanged
ENSG00000006837	protein_coding	cyclin dependent kinase like 3 [Source:HGNC Symbol;Acc:HGNC:15483]	CDKL3	-0.207339	1.46493	1.6126	0.204126	0.894555	Unchanged
ENSG00000007001	protein_coding	uridine phosphorylase 2 [Source:HGNC Symbol;Acc:HGNC:23061]	UPP2	-0.0295163	-1.7502	0.00165938	0.967507	0.998791	Unchanged
ENSG00000007047	protein_coding	microtubule affinity regulating kinase 4 [Source:HGNC Symbol;Acc:HGNC:13538]	MARK4	-0.0240737	5.74492	0.233364	0.62904	0.980546	Unchanged
ENSG00000007062	protein_coding	prominin 1 [Source:HGNC Symbol;Acc:HGNC:9454]	PROM1	0.138854	-1.45684	0.0750483	0.784123	0.993101	Unchanged
ENSG00000007080	protein_coding	coiled-coil domain containing 124 [Source:HGNC Symbol;Acc:HGNC:25171]	CCDC124	0.0676144	6.02314	1.65905	0.197732	0.89065	Unchanged
ENSG00000007168	protein_coding	platelet activating factor acetylhydrolase 1b regulatory subunit 1 [Source:HGNC Symbol;Acc:HGNC:8574]	PAFAH1B1	-0.0231693	8.29806	0.493732	0.482267	0.970526	Unchanged
ENSG00000007171	protein_coding	nitric oxide synthase 2 [Source:HGNC Symbol;Acc:HGNC:7873]	NOS2	0.289167	1.98782	4.21216	0.0401351	0.681267	Unchanged
ENSG00000007174	protein_coding	dynein axonemal heavy chain 9 [Source:HGNC Symbol;Acc:HGNC:2953]	DNAH9	-0.214451	0.780707	0.908717	0.340455	0.939307	Unchanged
ENSG00000007202	protein_coding	KIAA0100 [Source:HGNC Symbol;Acc:HGNC:28960]	KIAA0100	-0.0264765	8.17452	0.604548	0.436848	0.964481	Unchanged
ENSG00000007237	protein_coding	growth arrest specific 7 [Source:HGNC Symbol;Acc:HGNC:4169]	GAS7	-0.129301	3.23514	2.05	0.152206	0.866807	Unchanged
ENSG00000007255	protein_coding	trafficking protein particle complex 6A [Source:HGNC Symbol;Acc:HGNC:23069]	TRAPPC6A	0.0360256	2.68049	0.101432	0.750118	0.992067	Unchanged
ENSG00000007264	protein_coding	megakaryocyte-associated tyrosine kinase [Source:HGNC Symbol;Acc:HGNC:6906]	MATK	-0.300128	-1.69454	0.358314	0.549444	0.978558	Unchanged
ENSG00000007341	protein_coding	suppression of tumorigenicity 7 like [Source:HGNC Symbol;Acc:HGNC:18441]	ST7L	-0.0939157	4.35014	1.91208	0.166732	0.873341	Unchanged
ENSG00000007376	protein_coding	RNA pseudouridine synthase domain containing 1 [Source:HGNC Symbol;Acc:HGNC:14173]	RPUSD1	0.0107454	4.42807	0.0238	0.877395	0.998208	Unchanged
ENSG00000007384	protein_coding	rhomboid 5 homolog 1 [Source:HGNC Symbol;Acc:HGNC:20561]	RHBDF1	0.155446	-0.0613506	0.2975	0.585454	0.980546	Unchanged
ENSG00000007392	protein_coding	LUC7 like [Source:HGNC Symbol;Acc:HGNC:6723]	LUC7L	0.0619197	6.93694	1.46781	0.225692	0.901346	Unchanged
ENSG00000007402	protein_coding	calcium voltage-gated channel auxiliary subunit alpha2delta 2 [Source:HGNC Symbol;Acc:HGNC:1400]	CACNA2D2	0.0229916	6.76997	0.296748	0.585928	0.980546	Unchanged
ENSG00000007516	protein_coding	BAI1 associated protein 3 [Source:HGNC Symbol;Acc:HGNC:948]	BAIAP3	-0.248005	-0.660991	0.406468	0.523767	0.97327	Unchanged
ENSG00000007520	protein_coding	TSR3 ribosome maturation factor [Source:HGNC Symbol;Acc:HGNC:14175]	TSR3	-0.0552491	4.9925	0.804943	0.36962	0.94626	Unchanged
ENSG00000007541	protein_coding	phosphatidylinositol glycan anchor biosynthesis class Q [Source:HGNC Symbol;Acc:HGNC:14135]	PIGQ	0.141036	4.78218	3.13548	0.0766056	0.787018	Unchanged
ENSG00000007545	protein_coding	cramped chromatin regulator homolog 1 [Source:HGNC Symbol;Acc:HGNC:14122]	CRAMP1	-9.86586e-05	4.52201	2.21019e-06	0.998814	0.999523	Unchanged
ENSG00000007866	protein_coding	TEA domain transcription factor 3 [Source:HGNC Symbol;Acc:HGNC:11716]	TEAD3	-0.052149	2.77534	0.203749	0.651711	0.982638	Unchanged
ENSG00000007923	protein_coding	DnaJ heat shock protein family (Hsp40) member C11 [Source:HGNC Symbol;Acc:HGNC:25570]	DNAJC11	-0.0149784	6.62931	0.115014	0.734507	0.990209	Unchanged
ENSG00000007944	protein_coding	myosin regulatory light chain interacting protein [Source:HGNC Symbol;Acc:HGNC:21155]	MYLIP	-0.18794	2.09794	2.17332	0.140423	0.864353	Unchanged
ENSG00000007968	protein_coding	E2F transcription factor 2 [Source:HGNC Symbol;Acc:HGNC:3114]	E2F2	0.0781118	6.44528	3.53974	0.0599149	0.758663	Unchanged
ENSG00000008018	protein_coding	proteasome 20S subunit beta 1 [Source:HGNC Symbol;Acc:HGNC:9537]	PSMB1	-0.00452427	6.96854	0.0142322	0.905038	0.998208	Unchanged
ENSG00000008056	protein_coding	synapsin I [Source:HGNC Symbol;Acc:HGNC:11494]	SYN1	0.0176219	4.31652	0.064564	0.799423	0.994737	Unchanged
ENSG00000008083	protein_coding	jumonji and AT-rich interaction domain containing 2 [Source:HGNC Symbol;Acc:HGNC:6196]	JARID2	0.0420092	5.91691	0.883847	0.34715	0.942994	Unchanged
ENSG00000008086	protein_coding	cyclin dependent kinase like 5 [Source:HGNC Symbol;Acc:HGNC:11411]	CDKL5	0.00756664	6.03116	0.0310964	0.860025	0.998208	Unchanged
ENSG00000008128	protein_coding	cyclin dependent kinase 11A [Source:HGNC Symbol;Acc:HGNC:1730]	CDK11A	-0.273313	1.1052	1.73473	0.187808	0.884048	Unchanged
ENSG00000008130	protein_coding	NAD kinase [Source:HGNC Symbol;Acc:HGNC:29831]	NADK	-0.0195544	5.6055	0.113947	0.735695	0.990209	Unchanged
ENSG00000008196	protein_coding	transcription factor AP-2 beta [Source:HGNC Symbol;Acc:HGNC:11743]	TFAP2B	-0.00490411	9.34954	0.0165447	0.897653	0.998208	Unchanged
ENSG00000008197	protein_coding	transcription factor AP-2 delta [Source:HGNC Symbol;Acc:HGNC:15581]	TFAP2D	0.113706	-1.11917	0.060634	0.805497	0.996147	Unchanged
ENSG00000008256	protein_coding	cytohesin 3 [Source:HGNC Symbol;Acc:HGNC:9504]	CYTH3	-0.0873667	5.59834	3.01787	0.0823514	0.795491	Unchanged
ENSG00000008277	protein_coding	ADAM metallopeptidase domain 22 [Source:HGNC Symbol;Acc:HGNC:201]	ADAM22	-0.00767983	8.99547	0.0473522	0.827736	0.996176	Unchanged
ENSG00000008282	protein_coding	synaptophysin like 1 [Source:HGNC Symbol;Acc:HGNC:11507]	SYPL1	0.0791198	4.5091	1.45037	0.228469	0.901346	Unchanged
ENSG00000008283	protein_coding	cytochrome b561 [Source:HGNC Symbol;Acc:HGNC:2571]	CYB561	-0.0106594	7.87635	0.0708232	0.790142	0.993772	Unchanged
ENSG00000008294	protein_coding	sperm associated antigen 9 [Source:HGNC Symbol;Acc:HGNC:14524]	SPAG9	-0.0473962	8.65813	1.81397	0.178033	0.879851	Unchanged
ENSG00000008300	protein_coding	cadherin EGF LAG seven-pass G-type receptor 3 [Source:HGNC Symbol;Acc:HGNC:3230]	CELSR3	-0.0160305	7.93519	0.163463	0.685988	0.986034	Unchanged
ENSG00000008311	protein_coding	aminoadipate-semialdehyde synthase [Source:HGNC Symbol;Acc:HGNC:17366]	AASS	-0.105527	1.32061	0.348312	0.55507	0.979393	Unchanged
ENSG00000008324	protein_coding	SS18 like 2 [Source:HGNC Symbol;Acc:HGNC:15593]	SS18L2	-0.0518188	3.95474	0.449654	0.502499	0.972467	Unchanged
ENSG00000008382	protein_coding	MPN domain containing [Source:HGNC Symbol;Acc:HGNC:25934]	MPND	0.0481304	4.21055	0.462647	0.49639	0.972467	Unchanged
ENSG00000008394	protein_coding	microsomal glutathione S-transferase 1 [Source:HGNC Symbol;Acc:HGNC:7061]	MGST1	-0.193187	-1.34567	0.128988	0.719484	0.989832	Unchanged
ENSG00000008405	protein_coding	cryptochrome circadian regulator 1 [Source:HGNC Symbol;Acc:HGNC:2384]	CRY1	0.014681	4.42784	0.0591373	0.807865	0.996154	Unchanged
ENSG00000008441	protein_coding	nuclear factor I X [Source:HGNC Symbol;Acc:HGNC:7788]	NFIX	0.00292829	6.05442	0.00399926	0.949576	0.998208	Unchanged
ENSG00000008513	protein_coding	ST3 beta-galactoside alpha-2,3-sialyltransferase 1 [Source:HGNC Symbol;Acc:HGNC:10862]	ST3GAL1	0.00119408	2.70944	9.72931e-05	0.99213	0.999523	Unchanged
ENSG00000008710	protein_coding	polycystin 1, transient receptor potential channel interacting [Source:HGNC Symbol;Acc:HGNC:9008]	PKD1	0.0568356	7.47504	1.39531	0.23751	0.906186	Unchanged
ENSG00000008735	protein_coding	mitogen-activated protein kinase 8 interacting protein 2 [Source:HGNC Symbol;Acc:HGNC:6883]	MAPK8IP2	-0.0680381	7.04061	2.52732	0.11189	0.836423	Unchanged
ENSG00000008838	protein_coding	mediator complex subunit 24 [Source:HGNC Symbol;Acc:HGNC:22963]	MED24	0.0100459	6.52018	0.0467461	0.828825	0.996176	Unchanged
ENSG00000008853	protein_coding	Rho related BTB domain containing 2 [Source:HGNC Symbol;Acc:HGNC:18756]	RHOBTB2	-0.0128335	5.73657	0.0472932	0.827842	0.996176	Unchanged
ENSG00000008869	protein_coding	HEAT repeat containing 5B [Source:HGNC Symbol;Acc:HGNC:29273]	HEATR5B	-0.0830699	6.6947	4.81872	0.0281522	0.637007	Unchanged
ENSG00000008952	protein_coding	SEC62 homolog, preprotein translocation factor [Source:HGNC Symbol;Acc:HGNC:11846]	SEC62	-0.0257842	7.18856	0.311449	0.576793	0.980546	Unchanged
ENSG00000008988	protein_coding	ribosomal protein S20 [Source:HGNC Symbol;Acc:HGNC:10405]	RPS20	-0.0203629	9.03184	0.209481	0.647174	0.982638	Unchanged
ENSG00000009307	protein_coding	cold shock domain containing E1 [Source:HGNC Symbol;Acc:HGNC:29905]	CSDE1	0.0163936	9.71918	0.264393	0.607118	0.980546	Unchanged
ENSG00000009335	protein_coding	ubiquitin protein ligase E3C [Source:HGNC Symbol;Acc:HGNC:16803]	UBE3C	-0.0669158	7.10153	3.46317	0.06275	0.77047	Unchanged
ENSG00000009413	protein_coding	REV3 like, DNA directed polymerase zeta catalytic subunit [Source:HGNC Symbol;Acc:HGNC:9968]	REV3L	0.00667429	6.92	0.0135555	0.907313	0.998208	Unchanged
ENSG00000009694	protein_coding	teneurin transmembrane protein 1 [Source:HGNC Symbol;Acc:HGNC:8117]	TENM1	-0.0357047	3.40288	0.154755	0.694032	0.986542	Unchanged
ENSG00000009709	protein_coding	paired box 7 [Source:HGNC Symbol;Acc:HGNC:8621]	PAX7	-0.315555	1.23246	2.76241	0.0965031	0.820002	Unchanged
ENSG00000009724	protein_coding	mannan binding lectin serine peptidase 2 [Source:HGNC Symbol;Acc:HGNC:6902]	MASP2	0.60523	-1.85267	0.941536	0.331883	0.934997	Unchanged
ENSG00000009780	protein_coding	family with sequence similarity 76 member A [Source:HGNC Symbol;Acc:HGNC:28530]	FAM76A	0.103903	3.89549	1.75306	0.185492	0.882557	Unchanged
ENSG00000009830	protein_coding	protein O-mannosyltransferase 2 [Source:HGNC Symbol;Acc:HGNC:19743]	POMT2	0.0447208	5.75824	0.787048	0.374994	0.948036	Unchanged
ENSG00000009844	protein_coding	vesicle trafficking 1 [Source:HGNC Symbol;Acc:HGNC:20954]	VTA1	-0.0297894	6.34379	0.454628	0.500145	0.972467	Unchanged
ENSG00000009950	protein_coding	MLX interacting protein like [Source:HGNC Symbol;Acc:HGNC:12744]	MLXIPL	-0.224095	0.0159582	0.613674	0.433408	0.963766	Unchanged
ENSG00000009954	protein_coding	bromodomain adjacent to zinc finger domain 1B [Source:HGNC Symbol;Acc:HGNC:961]	BAZ1B	-0.0266091	9.07697	0.632391	0.42648	0.959463	Unchanged
ENSG00000010017	protein_coding	RAN binding protein 9 [Source:HGNC Symbol;Acc:HGNC:13727]	RANBP9	-0.0871318	5.95932	4.26973	0.0387972	0.67825	Unchanged
ENSG00000010030	protein_coding	ETS variant transcription factor 7 [Source:HGNC Symbol;Acc:HGNC:18160]	ETV7	0.781161	-1.77856	1.30085	0.254058	0.91002	Unchanged
ENSG00000010072	protein_coding	SprT-like N-terminal domain [Source:HGNC Symbol;Acc:HGNC:25356]	SPRTN	-0.0413835	4.6918	0.366002	0.545191	0.978002	Unchanged
ENSG00000010165	protein_coding	eEF1A lysine and N-terminal methyltransferase [Source:HGNC Symbol;Acc:HGNC:24248]	EEF1AKNMT	-0.0503916	6.48161	1.36219	0.243159	0.90687	Unchanged
ENSG00000010219	protein_coding	dual specificity tyrosine phosphorylation regulated kinase 4 [Source:HGNC Symbol;Acc:HGNC:3095]	DYRK4	0.0691811	2.54755	0.293247	0.588147	0.980546	Unchanged
ENSG00000010244	protein_coding	zinc finger protein 207 [Source:HGNC Symbol;Acc:HGNC:12998]	ZNF207	0.0443738	7.87401	1.66638	0.196744	0.89065	Unchanged
ENSG00000010256	protein_coding	ubiquinol-cytochrome c reductase core protein 1 [Source:HGNC Symbol;Acc:HGNC:12585]	UQCRC1	0.0164264	6.26797	0.130885	0.717516	0.989826	Unchanged
ENSG00000010270	protein_coding	STARD3 N-terminal like [Source:HGNC Symbol;Acc:HGNC:19169]	STARD3NL	-0.0534675	6.23366	1.3188	0.250807	0.91002	Unchanged
ENSG00000010278	protein_coding	CD9 molecule [Source:HGNC Symbol;Acc:HGNC:1709]	CD9	0.167266	3.31715	2.21216	0.136927	0.863426	Unchanged
ENSG00000010292	protein_coding	non-SMC condensin I complex subunit D2 [Source:HGNC Symbol;Acc:HGNC:24305]	NCAPD2	-0.0288818	8.23694	0.737502	0.390462	0.951869	Unchanged
ENSG00000010295	protein_coding	intermediate filament family orphan 1 [Source:HGNC Symbol;Acc:HGNC:24970]	IFFO1	0.0377119	4.2332	0.248435	0.618179	0.980546	Unchanged
ENSG00000010310	protein_coding	gastric inhibitory polypeptide receptor [Source:HGNC Symbol;Acc:HGNC:4271]	GIPR	-0.18888	-0.026918	0.471093	0.492485	0.972467	Unchanged
ENSG00000010318	protein_coding	PHD finger protein 7 [Source:HGNC Symbol;Acc:HGNC:18458]	PHF7	-0.119969	3.01904	1.42087	0.23326	0.904984	Unchanged
ENSG00000010319	protein_coding	semaphorin 3G [Source:HGNC Symbol;Acc:HGNC:30400]	SEMA3G	0.23165	-1.42242	0.214825	0.643012	0.982638	Unchanged
ENSG00000010322	protein_coding	nischarin [Source:HGNC Symbol;Acc:HGNC:18006]	NISCH	0.0264018	6.74758	0.335329	0.562538	0.980269	Unchanged
ENSG00000010361	protein_coding	fuzzy planar cell polarity protein [Source:HGNC Symbol;Acc:HGNC:26219]	FUZ	-0.0396852	5.08043	0.412854	0.520524	0.97327	Unchanged
ENSG00000010404	protein_coding	iduronate 2-sulfatase [Source:HGNC Symbol;Acc:HGNC:5389]	IDS	0.00974752	4.0116	0.0121135	0.912361	0.998208	Unchanged
ENSG00000010438	protein_coding	serine protease 3 [Source:HGNC Symbol;Acc:HGNC:9486]	PRSS3	0.0760947	4.07928	0.909988	0.340118	0.93918	Unchanged
ENSG00000010539	protein_coding	zinc finger protein 200 [Source:HGNC Symbol;Acc:HGNC:12993]	ZNF200	0.00687256	4.78745	0.0131892	0.908568	0.998208	Unchanged
ENSG00000010626	protein_coding	leucine rich repeat containing 23 [Source:HGNC Symbol;Acc:HGNC:19138]	LRRC23	0.158599	3.21923	3.24097	0.0718183	0.782824	Unchanged
ENSG00000010803	protein_coding	Scm polycomb group protein homolog 1 [Source:HGNC Symbol;Acc:HGNC:19003]	SCMH1	-0.0361565	5.79515	0.543595	0.460947	0.969572	Unchanged
ENSG00000010810	protein_coding	FYN proto-oncogene, Src family tyrosine kinase [Source:HGNC Symbol;Acc:HGNC:4037]	FYN	-0.0419005	6.44874	1.11614	0.290752	0.92249	Unchanged
ENSG00000010818	protein_coding	HIVEP zinc finger 2 [Source:HGNC Symbol;Acc:HGNC:4921]	HIVEP2	-0.0246921	5.14058	0.185451	0.66673	0.984459	Unchanged
ENSG00000011007	protein_coding	elongin A [Source:HGNC Symbol;Acc:HGNC:11620]	ELOA	-0.0252579	6.78542	0.331443	0.56481	0.980269	Unchanged
ENSG00000011009	protein_coding	lysophospholipase 2 [Source:HGNC Symbol;Acc:HGNC:6738]	LYPLA2	0.0774225	6.12553	2.72955	0.0985073	0.824773	Unchanged
ENSG00000011021	protein_coding	chloride voltage-gated channel 6 [Source:HGNC Symbol;Acc:HGNC:2024]	CLCN6	0.0358112	5.82192	0.568856	0.450714	0.968568	Unchanged
ENSG00000011028	protein_coding	mannose receptor C type 2 [Source:HGNC Symbol;Acc:HGNC:16875]	MRC2	-0.00080367	6.37974	0.000340139	0.985286	0.999523	Unchanged
ENSG00000011105	protein_coding	tetraspanin 9 [Source:HGNC Symbol;Acc:HGNC:21640]	TSPAN9	-0.0273679	4.81253	0.208659	0.647821	0.982638	Unchanged
ENSG00000011114	protein_coding	BTB domain containing 7 [Source:HGNC Symbol;Acc:HGNC:18269]	BTBD7	-0.042703	6.74684	1.21219	0.270899	0.914023	Unchanged
ENSG00000011132	protein_coding	amyloid beta precursor protein binding family A member 3 [Source:HGNC Symbol;Acc:HGNC:580]	APBA3	0.0626395	3.48809	0.442982	0.505687	0.973159	Unchanged
ENSG00000011143	protein_coding	MKS transition zone complex subunit 1 [Source:HGNC Symbol;Acc:HGNC:7121]	MKS1	0.0618104	4.47699	0.820819	0.364941	0.945863	Unchanged
ENSG00000011198	protein_coding	abhydrolase domain containing 5, lysophosphatidic acid acyltransferase [Source:HGNC Symbol;Acc:HGNC:21396]	ABHD5	-0.0342732	4.64653	0.278595	0.597623	0.980546	Unchanged
ENSG00000011201	protein_coding	anosmin 1 [Source:HGNC Symbol;Acc:HGNC:6211]	ANOS1	0.957451	-0.655284	8.98691	0.00271921	0.31266	Unchanged
ENSG00000011243	protein_coding	A-kinase anchoring protein 8 like [Source:HGNC Symbol;Acc:HGNC:29857]	AKAP8L	0.0415514	5.3475	0.402656	0.525721	0.97327	Unchanged
ENSG00000011258	protein_coding	mbt domain containing 1 [Source:HGNC Symbol;Acc:HGNC:19866]	MBTD1	0.00744984	7.3206	0.0440108	0.833834	0.996176	Unchanged
ENSG00000011260	protein_coding	UTP18 small subunit processome component [Source:HGNC Symbol;Acc:HGNC:24274]	UTP18	-0.0445805	6.43706	1.06869	0.301241	0.925776	Unchanged
ENSG00000011275	protein_coding	ring finger protein 216 [Source:HGNC Symbol;Acc:HGNC:21698]	RNF216	-0.00808253	6.69037	0.0418538	0.837899	0.996271	Unchanged
ENSG00000011295	protein_coding	tetratricopeptide repeat domain 19 [Source:HGNC Symbol;Acc:HGNC:26006]	TTC19	-0.0488757	5.81324	1.13426	0.286869	0.921584	Unchanged
ENSG00000011304	protein_coding	polypyrimidine tract binding protein 1 [Source:HGNC Symbol;Acc:HGNC:9583]	PTBP1	0.0184245	8.87888	0.223206	0.636608	0.981381	Unchanged
ENSG00000011332	protein_coding	double PHD fingers 1 [Source:HGNC Symbol;Acc:HGNC:20225]	DPF1	-0.0166058	4.75213	0.0552875	0.814106	0.996176	Unchanged
ENSG00000011347	protein_coding	synaptotagmin 7 [Source:HGNC Symbol;Acc:HGNC:11514]	SYT7	-0.109821	5.06621	3.80132	0.0512121	0.723637	Unchanged
ENSG00000011376	protein_coding	leucyl-tRNA synthetase 2, mitochondrial [Source:HGNC Symbol;Acc:HGNC:17095]	LARS2	0.0639534	5.44951	1.62716	0.202096	0.892402	Unchanged
ENSG00000011405	protein_coding	phosphatidylinositol-4-phosphate 3-kinase catalytic subunit type 2 alpha [Source:HGNC Symbol;Acc:HGNC:8971]	PIK3C2A	-0.0580623	7.26041	2.0869	0.148567	0.865048	Unchanged
ENSG00000011422	protein_coding	plasminogen activator, urokinase receptor [Source:HGNC Symbol;Acc:HGNC:9053]	PLAUR	0.132915	4.32969	3.41176	0.0647334	0.772788	Unchanged
ENSG00000011426	protein_coding	anillin actin binding protein [Source:HGNC Symbol;Acc:HGNC:14082]	ANLN	-0.0644263	7.4054	2.33429	0.126553	0.85026	Unchanged
ENSG00000011451	protein_coding	WIZ zinc finger [Source:HGNC Symbol;Acc:HGNC:30917]	WIZ	-0.00483096	6.90828	0.0111549	0.915886	0.998208	Unchanged
ENSG00000011454	protein_coding	RAB GTPase activating protein 1 [Source:HGNC Symbol;Acc:HGNC:17155]	RABGAP1	-0.0324222	6.37807	0.563581	0.452821	0.969572	Unchanged
ENSG00000011465	protein_coding	decorin [Source:HGNC Symbol;Acc:HGNC:2705]	DCN	-0.0833852	-1.25296	0.0491524	0.824545	0.996176	Unchanged
ENSG00000011478	protein_coding	glutaminyl-peptide cyclotransferase like [Source:HGNC Symbol;Acc:HGNC:25952]	QPCTL	-0.126896	2.78094	1.02799	0.310631	0.930419	Unchanged
ENSG00000011485	protein_coding	protein phosphatase 5 catalytic subunit [Source:HGNC Symbol;Acc:HGNC:9322]	PPP5C	0.00857474	6.75671	0.0471555	0.828089	0.996176	Unchanged
ENSG00000011523	protein_coding	centrosomal protein 68 [Source:HGNC Symbol;Acc:HGNC:29076]	CEP68	-0.022898	6.43234	0.38013	0.537534	0.976159	Unchanged
ENSG00000011566	protein_coding	mitogen-activated protein kinase kinase kinase kinase 3 [Source:HGNC Symbol;Acc:HGNC:6865]	MAP4K3	-0.0410816	6.35095	0.842727	0.358618	0.944807	Unchanged
ENSG00000011638	protein_coding	transmembrane protein 159 [Source:HGNC Symbol;Acc:HGNC:30136]	TMEM159	-0.20658	1.87686	1.81544	0.177857	0.879851	Unchanged
ENSG00000011677	protein_coding	gamma-aminobutyric acid type A receptor subunit alpha3 [Source:HGNC Symbol;Acc:HGNC:4077]	GABRA3	-0.0225108	2.95059	0.0452555	0.831535	0.996176	Unchanged
ENSG00000012048	protein_coding	BRCA1 DNA repair associated [Source:HGNC Symbol;Acc:HGNC:1100]	BRCA1	-0.0700193	7.47289	3.21987	0.0727494	0.782824	Unchanged
ENSG00000012061	protein_coding	ERCC excision repair 1, endonuclease non-catalytic subunit [Source:HGNC Symbol;Acc:HGNC:3433]	ERCC1	0.0700701	6.34457	2.90576	0.0882635	0.807005	Unchanged
ENSG00000012171	protein_coding	semaphorin 3B [Source:HGNC Symbol;Acc:HGNC:10724]	SEMA3B	0.0921815	2.02241	0.609534	0.434963	0.964134	Unchanged
ENSG00000012174	protein_coding	membrane bound transcription factor peptidase, site 2 [Source:HGNC Symbol;Acc:HGNC:15455]	MBTPS2	-0.000946198	6.56741	0.000621496	0.980111	0.999244	Unchanged
ENSG00000012232	protein_coding	exostosin like glycosyltransferase 3 [Source:HGNC Symbol;Acc:HGNC:3518]	EXTL3	-0.0635552	6.5219	1.96184	0.161317	0.871237	Unchanged
ENSG00000012660	protein_coding	ELOVL fatty acid elongase 5 [Source:HGNC Symbol;Acc:HGNC:21308]	ELOVL5	-0.0676466	7.4382	3.17737	0.074665	0.78501	Unchanged
ENSG00000012822	protein_coding	calcium binding and coiled-coil domain 1 [Source:HGNC Symbol;Acc:HGNC:29306]	CALCOCO1	0.032162	5.26939	0.399701	0.527244	0.97327	Unchanged
ENSG00000012963	protein_coding	ubiquitin protein ligase E3 component n-recognin 7 [Source:HGNC Symbol;Acc:HGNC:20344]	UBR7	0.0110124	6.73389	0.0798442	0.777509	0.993101	Unchanged
ENSG00000012983	protein_coding	mitogen-activated protein kinase kinase kinase kinase 5 [Source:HGNC Symbol;Acc:HGNC:6867]	MAP4K5	-0.0224186	6.73044	0.285121	0.593364	0.980546	Unchanged
ENSG00000013016	protein_coding	EH domain containing 3 [Source:HGNC Symbol;Acc:HGNC:3244]	EHD3	-0.0553373	4.57791	0.813218	0.367171	0.945863	Unchanged
ENSG00000013275	protein_coding	proteasome 26S subunit, ATPase 4 [Source:HGNC Symbol;Acc:HGNC:9551]	PSMC4	0.0182313	6.9424	0.22185	0.637634	0.981605	Unchanged
ENSG00000013288	protein_coding	mannosidase alpha class 2B member 2 [Source:HGNC Symbol;Acc:HGNC:29623]	MAN2B2	0.0724949	4.38738	1.12141	0.289615	0.922397	Unchanged
ENSG00000013293	protein_coding	solute carrier family 7 member 14 [Source:HGNC Symbol;Acc:HGNC:29326]	SLC7A14	-0.0534177	6.23342	1.36178	0.243229	0.90687	Unchanged
ENSG00000013297	protein_coding	claudin 11 [Source:HGNC Symbol;Acc:HGNC:8514]	CLDN11	-0.947516	-1.36707	2.35703	0.124719	0.848131	Unchanged
ENSG00000013306	protein_coding	solute carrier family 25 member 39 [Source:HGNC Symbol;Acc:HGNC:24279]	SLC25A39	0.0474863	6.33706	0.72036	0.396026	0.953136	Unchanged
ENSG00000013364	protein_coding	major vault protein [Source:HGNC Symbol;Acc:HGNC:7531]	MVP	0.360233	0.425888	1.81113	0.178372	0.879851	Unchanged
ENSG00000013374	protein_coding	negative regulator of ubiquitin like proteins 1 [Source:HGNC Symbol;Acc:HGNC:17623]	NUB1	-0.00718073	6.71643	0.036652	0.848175	0.998123	Unchanged
ENSG00000013375	protein_coding	phosphoglucomutase 3 [Source:HGNC Symbol;Acc:HGNC:8907]	PGM3	-0.0535722	6.27014	1.38987	0.238427	0.906228	Unchanged
ENSG00000013392	protein_coding	RWD domain containing 2A [Source:HGNC Symbol;Acc:HGNC:21385]	RWDD2A	-0.0800473	3.2516	0.686985	0.407192	0.954361	Unchanged
ENSG00000013441	protein_coding	CDC like kinase 1 [Source:HGNC Symbol;Acc:HGNC:2068]	CLK1	0.304577	6.35787	47.0242	7.01139e-12	1.3661e-07	Up
ENSG00000013503	protein_coding	RNA polymerase III subunit B [Source:HGNC Symbol;Acc:HGNC:30348]	POLR3B	-0.109856	4.44186	2.62574	0.105143	0.832093	Unchanged
ENSG00000013523	protein_coding	angel homolog 1 [Source:HGNC Symbol;Acc:HGNC:19961]	ANGEL1	-0.0600315	4.64022	0.94727	0.330415	0.933855	Unchanged
ENSG00000013561	protein_coding	ring finger protein 14 [Source:HGNC Symbol;Acc:HGNC:10058]	RNF14	-0.118857	5.28027	4.40813	0.035768	0.667533	Unchanged
ENSG00000013563	protein_coding	deoxyribonuclease 1 like 1 [Source:HGNC Symbol;Acc:HGNC:2957]	DNASE1L1	0.131357	3.41023	2.08534	0.14872	0.865229	Unchanged
ENSG00000013573	protein_coding	DEAD/H-box helicase 11 [Source:HGNC Symbol;Acc:HGNC:2736]	DDX11	-0.0292619	5.73444	0.212973	0.644447	0.982638	Unchanged
ENSG00000013583	protein_coding	heme binding protein 1 [Source:HGNC Symbol;Acc:HGNC:17176]	HEBP1	-0.0526818	2.58059	0.21772	0.640783	0.981784	Unchanged
ENSG00000013588	protein_coding	G protein-coupled receptor class C group 5 member A [Source:HGNC Symbol;Acc:HGNC:9836]	GPRC5A	-1.26858	-1.60247	7.01062	0.00810276	0.463684	Unchanged
ENSG00000013619	protein_coding	mastermind like domain containing 1 [Source:HGNC Symbol;Acc:HGNC:2568]	MAMLD1	0.0485932	0.892547	0.0595236	0.80725	0.996154	Unchanged
ENSG00000013725	protein_coding	CD6 molecule [Source:HGNC Symbol;Acc:HGNC:1691]	CD6	0.13188	-1.85268	0.0509267	0.821458	0.996176	Unchanged
ENSG00000013810	protein_coding	transforming acidic coiled-coil containing protein 3 [Source:HGNC Symbol;Acc:HGNC:11524]	TACC3	0.000124006	7.4459	1.37229e-05	0.997044	0.999523	Unchanged
ENSG00000014123	protein_coding	UFM1 specific ligase 1 [Source:HGNC Symbol;Acc:HGNC:23039]	UFL1	-0.00985171	4.80397	0.0238954	0.877151	0.998208	Unchanged
ENSG00000014138	protein_coding	DNA polymerase alpha 2, accessory subunit [Source:HGNC Symbol;Acc:HGNC:30073]	POLA2	0.0843544	3.80685	0.806612	0.369124	0.94626	Unchanged
ENSG00000014164	protein_coding	zinc finger CCCH-type containing 3 [Source:HGNC Symbol;Acc:HGNC:28972]	ZC3H3	-0.0344262	4.11231	0.207792	0.648504	0.982638	Unchanged
ENSG00000014216	protein_coding	calpain 1 [Source:HGNC Symbol;Acc:HGNC:1476]	CAPN1	-0.00212001	5.82061	0.00146521	0.969466	0.998791	Unchanged
ENSG00000014641	protein_coding	malate dehydrogenase 1 [Source:HGNC Symbol;Acc:HGNC:6970]	MDH1	-0.00121002	6.76067	0.000986159	0.974948	0.998791	Unchanged
ENSG00000014824	protein_coding	solute carrier family 30 member 9 [Source:HGNC Symbol;Acc:HGNC:1329]	SLC30A9	-0.00338004	7.61629	0.00888559	0.9249	0.998208	Unchanged
ENSG00000014914	protein_coding	myotubularin related protein 11 [Source:HGNC Symbol;Acc:HGNC:24307]	MTMR11	-0.262812	0.683919	1.11089	0.291888	0.922867	Unchanged
ENSG00000014919	protein_coding	cytochrome c oxidase assembly homolog COX15 [Source:HGNC Symbol;Acc:HGNC:2263]	COX15	-0.0166213	6.0737	0.151609	0.697002	0.986578	Unchanged
ENSG00000015133	protein_coding	coiled-coil domain containing 88C [Source:HGNC Symbol;Acc:HGNC:19967]	CCDC88C	0.0462095	5.09025	0.718237	0.396723	0.953136	Unchanged
ENSG00000015153	protein_coding	YY1 associated factor 2 [Source:HGNC Symbol;Acc:HGNC:17363]	YAF2	0.00104801	5.00115	0.00036271	0.984805	0.999523	Unchanged
ENSG00000015171	protein_coding	zinc finger MYND-type containing 11 [Source:HGNC Symbol;Acc:HGNC:16966]	ZMYND11	-0.0348504	6.89677	0.743338	0.388594	0.951351	Unchanged
ENSG00000015285	protein_coding	WASP actin nucleation promoting factor [Source:HGNC Symbol;Acc:HGNC:12731]	WAS	-0.370998	-0.198313	1.58479	0.208073	0.896328	Unchanged
ENSG00000015475	protein_coding	BH3 interacting domain death agonist [Source:HGNC Symbol;Acc:HGNC:1050]	BID	0.0658961	5.45053	1.44801	0.228848	0.901874	Unchanged
ENSG00000015479	protein_coding	matrin 3 [Source:HGNC Symbol;Acc:HGNC:6912]	MATR3	0.609212	3.51553	15.2012	9.66412e-05	0.047074	Up
ENSG00000015532	protein_coding	xylosyltransferase 2 [Source:HGNC Symbol;Acc:HGNC:15517]	XYLT2	0.0415169	4.69812	0.346204	0.55627	0.979393	Unchanged
ENSG00000015592	protein_coding	stathmin 4 [Source:HGNC Symbol;Acc:HGNC:16078]	STMN4	0.0355278	5.03723	0.47204	0.49205	0.972467	Unchanged
ENSG00000015676	protein_coding	NudC domain containing 3 [Source:HGNC Symbol;Acc:HGNC:22208]	NUDCD3	-0.00896733	7.36932	0.0495084	0.823921	0.996176	Unchanged
ENSG00000016082	protein_coding	ISL LIM homeobox 1 [Source:HGNC Symbol;Acc:HGNC:6132]	ISL1	-0.0205953	8.23047	0.428021	0.512961	0.973159	Unchanged
ENSG00000016391	protein_coding	choline dehydrogenase [Source:HGNC Symbol;Acc:HGNC:24288]	CHDH	0.0649755	3.20767	0.384645	0.535128	0.976132	Unchanged
ENSG00000016402	protein_coding	interleukin 20 receptor subunit alpha [Source:HGNC Symbol;Acc:HGNC:6003]	IL20RA	-0.111592	3.70827	1.84022	0.174925	0.87779	Unchanged
ENSG00000016864	protein_coding	glycosyltransferase 8 domain containing 1 [Source:HGNC Symbol;Acc:HGNC:24870]	GLT8D1	0.047402	5.6796	0.816151	0.366308	0.945863	Unchanged
ENSG00000017260	protein_coding	ATPase secretory pathway Ca2+ transporting 1 [Source:HGNC Symbol;Acc:HGNC:13211]	ATP2C1	-0.0220753	7.11179	0.340545	0.559515	0.979478	Unchanged
ENSG00000017483	protein_coding	solute carrier family 38 member 5 [Source:HGNC Symbol;Acc:HGNC:18070]	SLC38A5	0.353382	-0.876048	0.648226	0.420748	0.957405	Unchanged
ENSG00000017797	protein_coding	ralA binding protein 1 [Source:HGNC Symbol;Acc:HGNC:9841]	RALBP1	-0.0494188	6.4998	1.39729	0.237177	0.905984	Unchanged
ENSG00000018189	protein_coding	RUN and FYVE domain containing 3 [Source:HGNC Symbol;Acc:HGNC:30285]	RUFY3	-0.0259258	7.72821	0.511776	0.474371	0.969572	Unchanged
ENSG00000018236	protein_coding	contactin 1 [Source:HGNC Symbol;Acc:HGNC:2171]	CNTN1	0.0162882	8.10192	0.157772	0.691216	0.986442	Unchanged
ENSG00000018408	protein_coding	WW domain containing transcription regulator 1 [Source:HGNC Symbol;Acc:HGNC:24042]	WWTR1	-0.36231	-0.749655	0.848398	0.357006	0.944807	Unchanged
ENSG00000018510	protein_coding	alkylglycerone phosphate synthase [Source:HGNC Symbol;Acc:HGNC:327]	AGPS	-0.0189719	7.24022	0.266345	0.605794	0.980546	Unchanged
ENSG00000018607	transcribed_unprocessed_pseudogene	zinc finger protein 806 [Source:HGNC Symbol;Acc:HGNC:33228]	ZNF806	-0.701182	-1.28314	2.13013	0.144429	0.864353	Unchanged
ENSG00000018610	protein_coding	STING1 ER exit protein 1 [Source:HGNC Symbol;Acc:HGNC:26239]	CXorf56	-0.0593337	4.90442	1.09773	0.294766	0.923628	Unchanged
ENSG00000018699	protein_coding	tetratricopeptide repeat domain 27 [Source:HGNC Symbol;Acc:HGNC:25986]	TTC27	0.0877531	5.0691	2.86633	0.0904508	0.813921	Unchanged
ENSG00000018869	protein_coding	zinc finger protein 582 [Source:HGNC Symbol;Acc:HGNC:26421]	ZNF582	-0.0612624	2.80353	0.310502	0.577372	0.980546	Unchanged
ENSG00000019144	protein_coding	pleckstrin homology like domain family B member 1 [Source:HGNC Symbol;Acc:HGNC:23697]	PHLDB1	-0.0513082	6.17452	1.21666	0.270017	0.914023	Unchanged
ENSG00000019485	protein_coding	PR/SET domain 11 [Source:HGNC Symbol;Acc:HGNC:13996]	PRDM11	0.107191	5.05949	3.23993	0.0718637	0.782824	Unchanged
ENSG00000019505	protein_coding	synaptotagmin 13 [Source:HGNC Symbol;Acc:HGNC:14962]	SYT13	-0.16212	3.483	3.49576	0.061526	0.7655	Unchanged
ENSG00000019549	protein_coding	snail family transcriptional repressor 2 [Source:HGNC Symbol;Acc:HGNC:11094]	SNAI2	0.157201	3.19828	1.64254	0.199977	0.890671	Unchanged
ENSG00000019582	protein_coding	CD74 molecule [Source:HGNC Symbol;Acc:HGNC:1697]	CD74	0.150386	-0.852544	0.140614	0.707671	0.987435	Unchanged
ENSG00000019991	protein_coding	hepatocyte growth factor [Source:HGNC Symbol;Acc:HGNC:4893]	HGF	-0.070347	1.08955	0.169562	0.680501	0.98482	Unchanged
ENSG00000019995	protein_coding	zinc finger RANBP2-type containing 1 [Source:HGNC Symbol;Acc:HGNC:18224]	ZRANB1	-0.0256017	6.11272	0.345327	0.55677	0.979393	Unchanged
ENSG00000020129	protein_coding	neurochondrin [Source:HGNC Symbol;Acc:HGNC:17597]	NCDN	0.0539572	5.65863	1.14355	0.284904	0.920311	Unchanged
ENSG00000020181	protein_coding	adhesion G protein-coupled receptor A2 [Source:HGNC Symbol;Acc:HGNC:17849]	ADGRA2	-0.0175588	6.0631	0.126947	0.721618	0.990007	Unchanged
ENSG00000020256	protein_coding	ZFP64 zinc finger protein [Source:HGNC Symbol;Acc:HGNC:15940]	ZFP64	0.0415576	5.01183	0.537734	0.463373	0.969572	Unchanged
ENSG00000020426	protein_coding	MNAT1 component of CDK activating kinase [Source:HGNC Symbol;Acc:HGNC:7181]	MNAT1	0.060279	3.7062	0.540841	0.462084	0.969572	Unchanged
ENSG00000020577	protein_coding	sterile alpha motif domain containing 4A [Source:HGNC Symbol;Acc:HGNC:23023]	SAMD4A	0.200332	4.03484	7.12938	0.00758308	0.455541	Unchanged
ENSG00000020633	protein_coding	RUNX family transcription factor 3 [Source:HGNC Symbol;Acc:HGNC:10473]	RUNX3	0.501172	-1.88381	0.769076	0.380503	0.94836	Unchanged
ENSG00000020922	protein_coding	MRE11 homolog, double strand break repair nuclease [Source:HGNC Symbol;Acc:HGNC:7230]	MRE11	0.0143914	6.78506	0.11329	0.736429	0.990209	Unchanged
ENSG00000021300	protein_coding	pleckstrin homology domain containing B1 [Source:HGNC Symbol;Acc:HGNC:19079]	PLEKHB1	-0.466002	-0.105243	3.20915	0.0732274	0.782824	Unchanged
ENSG00000021355	protein_coding	serpin family B member 1 [Source:HGNC Symbol;Acc:HGNC:3311]	SERPINB1	-0.0758749	2.52216	0.512353	0.474122	0.969572	Unchanged
ENSG00000021488	protein_coding	solute carrier family 7 member 9 [Source:HGNC Symbol;Acc:HGNC:11067]	SLC7A9	-0.157012	-2.10059	0.0330087	0.855832	0.998208	Unchanged
ENSG00000021574	protein_coding	spastin [Source:HGNC Symbol;Acc:HGNC:11233]	SPAST	-0.0487827	6.89461	1.22205	0.268958	0.914023	Unchanged
ENSG00000021645	protein_coding	neurexin 3 [Source:HGNC Symbol;Acc:HGNC:8010]	NRXN3	0.0221212	1.60181	0.0133785	0.907918	0.998208	Unchanged
ENSG00000021762	protein_coding	oxysterol binding protein like 5 [Source:HGNC Symbol;Acc:HGNC:16392]	OSBPL5	0.11101	2.06445	0.646113	0.421506	0.957851	Unchanged
ENSG00000021776	protein_coding	aquarius intron-binding spliceosomal factor [Source:HGNC Symbol;Acc:HGNC:29513]	AQR	-0.0276731	7.12601	0.637483	0.424624	0.95931	Unchanged
ENSG00000021826	protein_coding	carbamoyl-phosphate synthase 1 [Source:HGNC Symbol;Acc:HGNC:2323]	CPS1	0.460962	-0.133302	2.67803	0.101742	0.828616	Unchanged
ENSG00000022267	protein_coding	four and a half LIM domains 1 [Source:HGNC Symbol;Acc:HGNC:3702]	FHL1	-0.0184479	6.76509	0.21536	0.642599	0.982425	Unchanged
ENSG00000022277	protein_coding	replication termination factor 2 [Source:HGNC Symbol;Acc:HGNC:15890]	RTF2	0.0579665	5.6809	1.47284	0.224899	0.901346	Unchanged
ENSG00000022567	protein_coding	solute carrier family 45 member 4 [Source:HGNC Symbol;Acc:HGNC:29196]	SLC45A4	0.0235945	4.68603	0.13076	0.717646	0.989826	Unchanged
ENSG00000022840	protein_coding	ring finger protein 10 [Source:HGNC Symbol;Acc:HGNC:10055]	RNF10	-0.0276191	6.60056	0.531571	0.465947	0.969572	Unchanged
ENSG00000022976	protein_coding	zinc finger protein 839 [Source:HGNC Symbol;Acc:HGNC:20345]	ZNF839	-0.0231614	4.39026	0.136093	0.712196	0.98842	Unchanged
ENSG00000023041	protein_coding	zinc finger DHHC-type palmitoyltransferase 6 [Source:HGNC Symbol;Acc:HGNC:19160]	ZDHHC6	-0.109447	5.6282	3.98879	0.0458039	0.709882	Unchanged
ENSG00000023171	protein_coding	GRAM domain containing 1B [Source:HGNC Symbol;Acc:HGNC:29214]	GRAMD1B	0.0572073	4.46902	0.762303	0.382609	0.94836	Unchanged
ENSG00000023191	protein_coding	ribonuclease/angiogenin inhibitor 1 [Source:HGNC Symbol;Acc:HGNC:10074]	RNH1	0.0391354	4.9723	0.35237	0.552774	0.978876	Unchanged
ENSG00000023228	protein_coding	NADH:ubiquinone oxidoreductase core subunit S1 [Source:HGNC Symbol;Acc:HGNC:7707]	NDUFS1	-0.00918117	7.13162	0.0585689	0.808772	0.996154	Unchanged
ENSG00000023287	protein_coding	RB1 inducible coiled-coil 1 [Source:HGNC Symbol;Acc:HGNC:15574]	RB1CC1	-0.0343087	6.81843	0.468464	0.493695	0.972467	Unchanged
ENSG00000023318	protein_coding	endoplasmic reticulum protein 44 [Source:HGNC Symbol;Acc:HGNC:18311]	ERP44	-0.0690511	5.78304	2.07414	0.149815	0.865912	Unchanged
ENSG00000023330	protein_coding	5'-aminolevulinate synthase 1 [Source:HGNC Symbol;Acc:HGNC:396]	ALAS1	-0.0348552	4.48071	0.236172	0.626984	0.980546	Unchanged
ENSG00000023516	protein_coding	A-kinase anchoring protein 11 [Source:HGNC Symbol;Acc:HGNC:369]	AKAP11	-0.0557968	7.45434	2.16478	0.141205	0.864353	Unchanged
ENSG00000023572	protein_coding	glutaredoxin 2 [Source:HGNC Symbol;Acc:HGNC:16065]	GLRX2	-0.0839712	4.3855	1.45772	0.227293	0.901346	Unchanged
ENSG00000023608	protein_coding	small nuclear RNA activating complex polypeptide 1 [Source:HGNC Symbol;Acc:HGNC:11134]	SNAPC1	-0.0978782	3.76897	1.8341	0.175644	0.87779	Unchanged
ENSG00000023697	protein_coding	deoxyribose-phosphate aldolase [Source:HGNC Symbol;Acc:HGNC:24269]	DERA	0.07515	5.3865	1.82026	0.177283	0.879271	Unchanged
ENSG00000023734	protein_coding	serine/threonine kinase receptor associated protein [Source:HGNC Symbol;Acc:HGNC:30796]	STRAP	-0.00553071	7.71343	0.0232835	0.878722	0.998208	Unchanged
ENSG00000023839	protein_coding	ATP binding cassette subfamily C member 2 [Source:HGNC Symbol;Acc:HGNC:53]	ABCC2	-0.0838602	0.423688	0.07715	0.781197	0.993101	Unchanged
ENSG00000023892	protein_coding	DEF6 guanine nucleotide exchange factor [Source:HGNC Symbol;Acc:HGNC:2760]	DEF6	0.0518147	-1.60233	0.00785959	0.929357	0.998208	Unchanged
ENSG00000023902	protein_coding	pleckstrin homology domain containing O1 [Source:HGNC Symbol;Acc:HGNC:24310]	PLEKHO1	-0.0417763	6.33446	0.837944	0.359985	0.944807	Unchanged
ENSG00000023909	protein_coding	glutamate-cysteine ligase modifier subunit [Source:HGNC Symbol;Acc:HGNC:4312]	GCLM	-0.0578339	4.38504	0.787563	0.374838	0.948036	Unchanged
ENSG00000024048	protein_coding	ubiquitin protein ligase E3 component n-recognin 2 [Source:HGNC Symbol;Acc:HGNC:21289]	UBR2	-0.0994481	6.28805	5.2047	0.0225259	0.605726	Unchanged
ENSG00000024422	protein_coding	EH domain containing 2 [Source:HGNC Symbol;Acc:HGNC:3243]	EHD2	0.0866754	1.10902	0.177811	0.673261	0.98482	Unchanged
ENSG00000024526	protein_coding	DEP domain containing 1 [Source:HGNC Symbol;Acc:HGNC:22949]	DEPDC1	-0.02313	6.34623	0.288924	0.590911	0.980546	Unchanged
ENSG00000024862	protein_coding	coiled-coil domain containing 28A [Source:HGNC Symbol;Acc:HGNC:21098]	CCDC28A	-0.102243	3.32841	1.60974	0.204529	0.894806	Unchanged
ENSG00000025039	protein_coding	Ras related GTP binding D [Source:HGNC Symbol;Acc:HGNC:19903]	RRAGD	-0.148376	4.19296	4.39484	0.0360479	0.669459	Unchanged
ENSG00000025156	protein_coding	heat shock transcription factor 2 [Source:HGNC Symbol;Acc:HGNC:5225]	HSF2	0.0607559	5.78202	1.87196	0.17125	0.87732	Unchanged
ENSG00000025293	protein_coding	PHD finger protein 20 [Source:HGNC Symbol;Acc:HGNC:16098]	PHF20	-0.0776752	6.57362	3.7048	0.0542562	0.739383	Unchanged
ENSG00000025423	protein_coding	hydroxysteroid 17-beta dehydrogenase 6 [Source:HGNC Symbol;Acc:HGNC:23316]	HSD17B6	-0.167987	1.35367	0.650208	0.420038	0.957342	Unchanged
ENSG00000025434	protein_coding	nuclear receptor subfamily 1 group H member 3 [Source:HGNC Symbol;Acc:HGNC:7966]	NR1H3	-0.421279	1.64193	7.12285	0.00761078	0.455541	Unchanged
ENSG00000025708	protein_coding	thymidine phosphorylase [Source:HGNC Symbol;Acc:HGNC:3148]	TYMP	0.188702	1.28097	1.24291	0.264911	0.913569	Unchanged
ENSG00000025770	protein_coding	non-SMC condensin II complex subunit H2 [Source:HGNC Symbol;Acc:HGNC:25071]	NCAPH2	0.0952735	5.90505	3.09255	0.0786513	0.787018	Unchanged
ENSG00000025772	protein_coding	translocase of outer mitochondrial membrane 34 [Source:HGNC Symbol;Acc:HGNC:15746]	TOMM34	0.0614567	5.00227	1.1773	0.277906	0.91744	Unchanged
ENSG00000025796	protein_coding	SEC63 homolog, protein translocation regulator [Source:HGNC Symbol;Acc:HGNC:21082]	SEC63	0.0466799	7.39414	1.45341	0.227981	0.901346	Unchanged
ENSG00000025800	protein_coding	karyopherin subunit alpha 6 [Source:HGNC Symbol;Acc:HGNC:6399]	KPNA6	-0.0394275	6.78757	0.796037	0.372281	0.946588	Unchanged
ENSG00000026025	protein_coding	vimentin [Source:HGNC Symbol;Acc:HGNC:12692]	VIM	0.0341331	7.27503	0.664301	0.415045	0.95664	Unchanged
ENSG00000026036	protein_coding	RTEL1-TNFRSF6B readthrough (NMD candidate) [Source:HGNC Symbol;Acc:HGNC:44095]	RTEL1-TNFRSF6B	0.490733	2.0544	10.1842	0.00141649	0.222576	Unchanged
ENSG00000026103	protein_coding	Fas cell surface death receptor [Source:HGNC Symbol;Acc:HGNC:11920]	FAS	-0.180977	-0.898791	0.165259	0.68436	0.986034	Unchanged
ENSG00000026297	protein_coding	ribonuclease T2 [Source:HGNC Symbol;Acc:HGNC:21686]	RNASET2	0.127388	3.05898	1.79837	0.179909	0.879851	Unchanged
ENSG00000026508	protein_coding	CD44 molecule (Indian blood group) [Source:HGNC Symbol;Acc:HGNC:1681]	CD44	-0.119937	1.99409	0.799331	0.371294	0.94626	Unchanged
ENSG00000026559	protein_coding	potassium voltage-gated channel modifier subfamily G member 1 [Source:HGNC Symbol;Acc:HGNC:6248]	KCNG1	0.0111994	3.46852	0.0133045	0.908172	0.998208	Unchanged
ENSG00000026652	protein_coding	1-acylglycerol-3-phosphate O-acyltransferase 4 [Source:HGNC Symbol;Acc:HGNC:20885]	AGPAT4	-0.0671445	5.59371	1.68867	0.193776	0.887171	Unchanged
ENSG00000026950	protein_coding	butyrophilin subfamily 3 member A1 [Source:HGNC Symbol;Acc:HGNC:1138]	BTN3A1	0.0649252	4.3791	1.01574	0.313532	0.93049	Unchanged
ENSG00000027001	protein_coding	mitochondrial intermediate peptidase [Source:HGNC Symbol;Acc:HGNC:7104]	MIPEP	0.0780054	3.456	0.634654	0.425653	0.959323	Unchanged
ENSG00000027075	protein_coding	protein kinase C eta [Source:HGNC Symbol;Acc:HGNC:9403]	PRKCH	0.0336456	1.52051	0.0585261	0.808841	0.996154	Unchanged
ENSG00000027644	protein_coding	insulin receptor related receptor [Source:HGNC Symbol;Acc:HGNC:6093]	INSRR	0.0661791	2.961	0.382746	0.536137	0.976159	Unchanged
ENSG00000027697	protein_coding	interferon gamma receptor 1 [Source:HGNC Symbol;Acc:HGNC:5439]	IFNGR1	0.00944759	4.85786	0.0302999	0.861812	0.998208	Unchanged
ENSG00000027847	protein_coding	beta-1,4-galactosyltransferase 7 [Source:HGNC Symbol;Acc:HGNC:930]	B4GALT7	0.0896788	3.48517	1.15405	0.282703	0.918563	Unchanged
ENSG00000028137	protein_coding	TNF receptor superfamily member 1B [Source:HGNC Symbol;Acc:HGNC:11917]	TNFRSF1B	-0.350097	-0.735954	0.622485	0.430125	0.960645	Unchanged
ENSG00000028203	protein_coding	vezatin, adherens junctions transmembrane protein [Source:HGNC Symbol;Acc:HGNC:18258]	VEZT	-0.0328237	6.33483	0.645342	0.421783	0.958129	Unchanged
ENSG00000028277	protein_coding	POU class 2 homeobox 2 [Source:HGNC Symbol;Acc:HGNC:9213]	POU2F2	-0.220051	4.58156	10.758	0.00103829	0.202075	Unchanged
ENSG00000028310	protein_coding	bromodomain containing 9 [Source:HGNC Symbol;Acc:HGNC:25818]	BRD9	0.0932883	6.34524	5.11749	0.0236859	0.610577	Unchanged
ENSG00000028528	protein_coding	sorting nexin 1 [Source:HGNC Symbol;Acc:HGNC:11172]	SNX1	-0.0385876	7.03487	1.04264	0.307209	0.927612	Unchanged
ENSG00000028839	protein_coding	TATA-box binding protein like 1 [Source:HGNC Symbol;Acc:HGNC:11589]	TBPL1	0.0309169	5.09762	0.295422	0.586767	0.980546	Unchanged
ENSG00000029153	protein_coding	aryl hydrocarbon receptor nuclear translocator like 2 [Source:HGNC Symbol;Acc:HGNC:18984]	ARNTL2	0.069228	2.74551	0.394588	0.529898	0.974728	Unchanged
ENSG00000029363	protein_coding	BCL2 associated transcription factor 1 [Source:HGNC Symbol;Acc:HGNC:16863]	BCLAF1	0.0467229	8.51756	1.16143	0.281169	0.918563	Unchanged
ENSG00000029364	protein_coding	solute carrier family 39 member 9 [Source:HGNC Symbol;Acc:HGNC:20182]	SLC39A9	0.0160416	7.29132	0.19383	0.659747	0.983802	Unchanged
ENSG00000029534	protein_coding	ankyrin 1 [Source:HGNC Symbol;Acc:HGNC:492]	ANK1	-0.00551333	5.27711	0.00970629	0.921519	0.998208	Unchanged
ENSG00000029639	protein_coding	transcription factor B1, mitochondrial [Source:HGNC Symbol;Acc:HGNC:17037]	TFB1M	-0.101091	4.46529	2.89859	0.088657	0.808326	Unchanged
ENSG00000029725	protein_coding	rabaptin, RAB GTPase binding effector protein 1 [Source:HGNC Symbol;Acc:HGNC:17677]	RABEP1	0.0221677	6.76888	0.248607	0.618057	0.980546	Unchanged
ENSG00000029993	protein_coding	high mobility group box 3 [Source:HGNC Symbol;Acc:HGNC:5004]	HMGB3	0.028192	7.30244	0.592483	0.441461	0.965512	Unchanged
ENSG00000030066	protein_coding	nucleoporin 160 [Source:HGNC Symbol;Acc:HGNC:18017]	NUP160	-0.0168225	7.69285	0.28105	0.596014	0.980546	Unchanged
ENSG00000030110	protein_coding	BCL2 antagonist/killer 1 [Source:HGNC Symbol;Acc:HGNC:949]	BAK1	-0.0153065	2.45033	0.0118296	0.91339	0.998208	Unchanged
ENSG00000030419	protein_coding	IKAROS family zinc finger 2 [Source:HGNC Symbol;Acc:HGNC:13177]	IKZF2	0.0273068	1.91988	0.0360333	0.849447	0.998179	Unchanged
ENSG00000030582	protein_coding	granulin precursor [Source:HGNC Symbol;Acc:HGNC:4601]	GRN	0.0716002	5.37668	1.80323	0.179323	0.879851	Unchanged
ENSG00000031003	protein_coding	family with sequence similarity 13 member B [Source:HGNC Symbol;Acc:HGNC:1335]	FAM13B	-0.0558783	6.40728	2.0399	0.153219	0.867685	Unchanged
ENSG00000031081	protein_coding	Rho GTPase activating protein 31 [Source:HGNC Symbol;Acc:HGNC:29216]	ARHGAP31	0.0734287	6.4994	2.73262	0.0983177	0.824773	Unchanged
ENSG00000031691	protein_coding	centromere protein Q [Source:HGNC Symbol;Acc:HGNC:21347]	CENPQ	-0.00290391	4.20716	0.00161305	0.967963	0.998791	Unchanged
ENSG00000031698	protein_coding	seryl-tRNA synthetase 1 [Source:HGNC Symbol;Acc:HGNC:10537]	SARS1	0.0167432	6.60727	0.150447	0.698109	0.986578	Unchanged
ENSG00000031823	protein_coding	RAN binding protein 3 [Source:HGNC Symbol;Acc:HGNC:9850]	RANBP3	0.00271936	5.95108	0.00301247	0.956229	0.998717	Unchanged
ENSG00000032219	protein_coding	AT-rich interaction domain 4A [Source:HGNC Symbol;Acc:HGNC:9885]	ARID4A	-0.16354	5.87688	8.34304	0.00387167	0.355828	Unchanged
ENSG00000032389	protein_coding	EARP complex and GARP complex interacting protein 1 [Source:HGNC Symbol;Acc:HGNC:12383]	EIPR1	0.0708351	5.65538	1.79944	0.17978	0.879851	Unchanged
ENSG00000032444	protein_coding	patatin like phospholipase domain containing 6 [Source:HGNC Symbol;Acc:HGNC:16268]	PNPLA6	-0.00945692	5.32633	0.0236812	0.877699	0.998208	Unchanged
ENSG00000032742	protein_coding	intraflagellar transport 88 [Source:HGNC Symbol;Acc:HGNC:20606]	IFT88	0.0261748	4.92478	0.157975	0.691028	0.986442	Unchanged
ENSG00000033011	protein_coding	ALG1 chitobiosyldiphosphodolichol beta-mannosyltransferase [Source:HGNC Symbol;Acc:HGNC:18294]	ALG1	0.0683893	3.86626	0.605084	0.436645	0.964273	Unchanged
ENSG00000033030	protein_coding	zinc finger CCHC-type containing 8 [Source:HGNC Symbol;Acc:HGNC:25265]	ZCCHC8	-0.000246692	5.73456	2.46936e-05	0.996035	0.999523	Unchanged
ENSG00000033050	protein_coding	ATP binding cassette subfamily F member 2 [Source:HGNC Symbol;Acc:HGNC:71]	ABCF2	-0.00780226	4.6634	0.0163012	0.898405	0.998208	Unchanged
ENSG00000033100	protein_coding	chondroitin polymerizing factor 2 [Source:HGNC Symbol;Acc:HGNC:29270]	CHPF2	-0.00954061	5.19582	0.0296149	0.863367	0.998208	Unchanged
ENSG00000033170	protein_coding	fucosyltransferase 8 [Source:HGNC Symbol;Acc:HGNC:4019]	FUT8	0.012479	4.63823	0.0303519	0.861694	0.998208	Unchanged
ENSG00000033178	protein_coding	ubiquitin like modifier activating enzyme 6 [Source:HGNC Symbol;Acc:HGNC:25581]	UBA6	0.0315939	6.97885	0.614088	0.433253	0.963531	Unchanged
ENSG00000033327	protein_coding	GRB2 associated binding protein 2 [Source:HGNC Symbol;Acc:HGNC:14458]	GAB2	0.0438989	7.35271	1.07532	0.299747	0.925776	Unchanged
ENSG00000033627	protein_coding	ATPase H+ transporting V0 subunit a1 [Source:HGNC Symbol;Acc:HGNC:865]	ATP6V0A1	-0.0880018	6.42372	4.73041	0.0296338	0.644403	Unchanged
ENSG00000033800	protein_coding	protein inhibitor of activated STAT 1 [Source:HGNC Symbol;Acc:HGNC:2752]	PIAS1	-0.044096	6.28767	1.12956	0.28787	0.9216	Unchanged
ENSG00000033867	protein_coding	solute carrier family 4 member 7 [Source:HGNC Symbol;Acc:HGNC:11033]	SLC4A7	-0.0291855	6.88814	0.396296	0.529008	0.973755	Unchanged
ENSG00000034053	protein_coding	amyloid beta precursor protein binding family A member 2 [Source:HGNC Symbol;Acc:HGNC:579]	APBA2	-0.0206935	6.93282	0.307511	0.579212	0.980546	Unchanged
ENSG00000034152	protein_coding	mitogen-activated protein kinase kinase 3 [Source:HGNC Symbol;Acc:HGNC:6843]	MAP2K3	0.0194762	2.92727	0.028944	0.864908	0.998208	Unchanged
ENSG00000034239	protein_coding	EF-hand calcium binding domain 1 [Source:HGNC Symbol;Acc:HGNC:25678]	EFCAB1	-0.195177	-0.0694273	0.439893	0.507174	0.973159	Unchanged
ENSG00000034510	protein_coding	thymosin beta 10 [Source:HGNC Symbol;Acc:HGNC:11879]	TMSB10	0.0164514	8.43019	0.207294	0.648897	0.982638	Unchanged
ENSG00000034533	protein_coding	asteroid homolog 1 [Source:HGNC Symbol;Acc:HGNC:25021]	ASTE1	-0.0170445	3.47467	0.0356546	0.850231	0.998208	Unchanged
ENSG00000034677	protein_coding	ring finger protein 19A, RBR E3 ubiquitin protein ligase [Source:HGNC Symbol;Acc:HGNC:13432]	RNF19A	-0.103995	5.64988	4.67882	0.0305367	0.647442	Unchanged
ENSG00000034693	protein_coding	peroxisomal biogenesis factor 3 [Source:HGNC Symbol;Acc:HGNC:8858]	PEX3	0.0101041	3.36475	0.0108447	0.91706	0.998208	Unchanged
ENSG00000034713	protein_coding	GABA type A receptor associated protein like 2 [Source:HGNC Symbol;Acc:HGNC:13291]	GABARAPL2	0.0239515	6.18616	0.302234	0.582485	0.980546	Unchanged
ENSG00000035115	protein_coding	SH3 and SYLF domain containing 1 [Source:HGNC Symbol;Acc:HGNC:29546]	SH3YL1	-0.0788979	6.17603	3.19998	0.0736393	0.782824	Unchanged
ENSG00000035141	protein_coding	family with sequence similarity 136 member A [Source:HGNC Symbol;Acc:HGNC:25911]	FAM136A	-0.0473233	6.01862	0.975258	0.323372	0.933855	Unchanged
ENSG00000035403	protein_coding	vinculin [Source:HGNC Symbol;Acc:HGNC:12665]	VCL	-0.113568	5.98799	5.77498	0.0162559	0.548437	Unchanged
ENSG00000035499	protein_coding	DEP domain containing 1B [Source:HGNC Symbol;Acc:HGNC:24902]	DEPDC1B	0.0123976	5.28117	0.0568606	0.811529	0.996154	Unchanged
ENSG00000035664	protein_coding	death associated protein kinase 2 [Source:HGNC Symbol;Acc:HGNC:2675]	DAPK2	0.56952	1.19618	8.56654	0.00342397	0.342116	Unchanged
ENSG00000035681	protein_coding	neutral sphingomyelinase activation associated factor [Source:HGNC Symbol;Acc:HGNC:8017]	NSMAF	0.0493391	5.45838	1.01238	0.314334	0.93049	Unchanged
ENSG00000035687	protein_coding	adenylosuccinate synthase 2 [Source:HGNC Symbol;Acc:HGNC:292]	ADSS2	-0.0628714	6.37803	2.5306	0.111658	0.836423	Unchanged
ENSG00000035862	protein_coding	TIMP metallopeptidase inhibitor 2 [Source:HGNC Symbol;Acc:HGNC:11821]	TIMP2	-0.0392546	9.15462	1.03099	0.309927	0.930419	Unchanged
ENSG00000035928	protein_coding	replication factor C subunit 1 [Source:HGNC Symbol;Acc:HGNC:9969]	RFC1	-0.00558792	7.10493	0.0170782	0.896026	0.998208	Unchanged
ENSG00000036054	protein_coding	TBC1 domain family member 23 [Source:HGNC Symbol;Acc:HGNC:25622]	TBC1D23	-0.0358033	5.12177	0.43553	0.509288	0.973159	Unchanged
ENSG00000036257	protein_coding	cullin 3 [Source:HGNC Symbol;Acc:HGNC:2553]	CUL3	-0.0285141	6.99436	0.56196	0.453472	0.969572	Unchanged
ENSG00000036448	protein_coding	myomesin 2 [Source:HGNC Symbol;Acc:HGNC:7614]	MYOM2	-0.0678766	0.166036	0.0654716	0.798048	0.994515	Unchanged
ENSG00000036530	protein_coding	cytochrome P450 family 46 subfamily A member 1 [Source:HGNC Symbol;Acc:HGNC:2641]	CYP46A1	-0.0768288	-1.40032	0.0190875	0.890116	0.998208	Unchanged
ENSG00000036549	protein_coding	zinc finger ZZ-type containing 3 [Source:HGNC Symbol;Acc:HGNC:24523]	ZZZ3	-0.00935951	6.43821	0.0477543	0.827018	0.996176	Unchanged
ENSG00000036565	protein_coding	solute carrier family 18 member A1 [Source:HGNC Symbol;Acc:HGNC:10934]	SLC18A1	-0.0865257	5.49236	2.69873	0.100428	0.826172	Unchanged
ENSG00000036672	protein_coding	ubiquitin specific peptidase 2 [Source:HGNC Symbol;Acc:HGNC:12618]	USP2	0.0705776	2.14746	0.231774	0.630211	0.980546	Unchanged
ENSG00000037042	protein_coding	tubulin gamma 2 [Source:HGNC Symbol;Acc:HGNC:12419]	TUBG2	0.218978	3.4572	5.0936	0.0240143	0.613229	Unchanged
ENSG00000037241	protein_coding	ribosomal protein L26 like 1 [Source:HGNC Symbol;Acc:HGNC:17050]	RPL26L1	-0.0605853	3.51783	0.487235	0.485163	0.971573	Unchanged
ENSG00000037280	protein_coding	fms related receptor tyrosine kinase 4 [Source:HGNC Symbol;Acc:HGNC:3767]	FLT4	1.00813	-0.837079	3.40639	0.0649443	0.772788	Unchanged
ENSG00000037474	protein_coding	NOP2/Sun RNA methyltransferase 2 [Source:HGNC Symbol;Acc:HGNC:25994]	NSUN2	0.0392946	7.173	1.15745	0.281996	0.918563	Unchanged
ENSG00000037637	protein_coding	F-box protein 42 [Source:HGNC Symbol;Acc:HGNC:29249]	FBXO42	-0.119539	5.33999	5.50143	0.0190009	0.585782	Unchanged
ENSG00000037749	protein_coding	microfibril associated protein 3 [Source:HGNC Symbol;Acc:HGNC:7034]	MFAP3	-0.0323106	7.08855	0.626615	0.4286	0.960241	Unchanged
ENSG00000037757	protein_coding	methylthioribose-1-phosphate isomerase 1 [Source:HGNC Symbol;Acc:HGNC:28469]	MRI1	0.0357352	4.69725	0.283914	0.594147	0.980546	Unchanged
ENSG00000037897	protein_coding	methyltransferase like 1 [Source:HGNC Symbol;Acc:HGNC:7030]	METTL1	0.0853211	3.30086	0.720835	0.39587	0.953136	Unchanged
ENSG00000037965	protein_coding	homeobox C8 [Source:HGNC Symbol;Acc:HGNC:5129]	HOXC8	-0.716087	-0.954728	3.2864	0.0698559	0.782824	Unchanged
ENSG00000038002	protein_coding	aspartylglucosaminidase [Source:HGNC Symbol;Acc:HGNC:318]	AGA	0.0267979	3.53313	0.108837	0.741472	0.990714	Unchanged
ENSG00000038210	protein_coding	phosphatidylinositol 4-kinase type 2 beta [Source:HGNC Symbol;Acc:HGNC:18215]	PI4K2B	0.0836401	3.91127	0.932172	0.334299	0.936042	Unchanged
ENSG00000038219	protein_coding	biorientation of chromosomes in cell division 1 like 1 [Source:HGNC Symbol;Acc:HGNC:31792]	BOD1L1	0.0387019	7.95259	0.430736	0.511628	0.973159	Unchanged
ENSG00000038274	protein_coding	methionine adenosyltransferase 2B [Source:HGNC Symbol;Acc:HGNC:6905]	MAT2B	0.00239223	6.40908	0.00284752	0.957443	0.998759	Unchanged
ENSG00000038358	protein_coding	enhancer of mRNA decapping 4 [Source:HGNC Symbol;Acc:HGNC:17157]	EDC4	-0.0196652	5.93296	0.158674	0.69038	0.986442	Unchanged
ENSG00000038382	protein_coding	trio Rho guanine nucleotide exchange factor [Source:HGNC Symbol;Acc:HGNC:12303]	TRIO	-0.00267975	8.68083	0.00678277	0.934362	0.998208	Unchanged
ENSG00000038427	protein_coding	versican [Source:HGNC Symbol;Acc:HGNC:2464]	VCAN	-0.0277076	4.9158	0.252402	0.615389	0.980546	Unchanged
ENSG00000038532	protein_coding	C-type lectin domain containing 16A [Source:HGNC Symbol;Acc:HGNC:29013]	CLEC16A	-0.0519977	6.13687	1.36577	0.24254	0.90687	Unchanged
ENSG00000039068	protein_coding	cadherin 1 [Source:HGNC Symbol;Acc:HGNC:1748]	CDH1	0.145285	-0.283477	0.221458	0.637931	0.981605	Unchanged
ENSG00000039123	protein_coding	Mtr4 exosome RNA helicase [Source:HGNC Symbol;Acc:HGNC:18734]	MTREX	0.0101138	6.89871	0.0559492	0.813017	0.996176	Unchanged
ENSG00000039139	protein_coding	dynein axonemal heavy chain 5 [Source:HGNC Symbol;Acc:HGNC:2950]	DNAH5	-0.355072	0.463373	1.88135	0.170181	0.875141	Unchanged
ENSG00000039319	protein_coding	zinc finger FYVE-type containing 16 [Source:HGNC Symbol;Acc:HGNC:20756]	ZFYVE16	-0.101432	6.92182	5.64982	0.0174571	0.562785	Unchanged
ENSG00000039523	protein_coding	RHO family interacting cell polarization regulator 1 [Source:HGNC Symbol;Acc:HGNC:25836]	RIPOR1	-0.089895	5.6782	2.92501	0.0872167	0.804398	Unchanged
ENSG00000039537	protein_coding	complement C6 [Source:HGNC Symbol;Acc:HGNC:1339]	C6	0.111088	1.47878	0.586086	0.443937	0.966453	Unchanged
ENSG00000039560	protein_coding	retinoic acid induced 14 [Source:HGNC Symbol;Acc:HGNC:14873]	RAI14	0.0170834	5.49388	0.0900572	0.764104	0.992613	Unchanged
ENSG00000039650	protein_coding	polynucleotide kinase 3'-phosphatase [Source:HGNC Symbol;Acc:HGNC:9154]	PNKP	0.128264	5.38102	4.4036	0.0358631	0.668667	Unchanged
ENSG00000040199	protein_coding	PH domain and leucine rich repeat protein phosphatase 2 [Source:HGNC Symbol;Acc:HGNC:29149]	PHLPP2	-0.0870874	5.22806	2.53911	0.111057	0.836104	Unchanged
ENSG00000040275	protein_coding	spindle apparatus coiled-coil protein 1 [Source:HGNC Symbol;Acc:HGNC:26010]	SPDL1	0.0164043	6.24876	0.149037	0.699458	0.987004	Unchanged
ENSG00000040341	protein_coding	staufen double-stranded RNA binding protein 2 [Source:HGNC Symbol;Acc:HGNC:11371]	STAU2	0.0655214	6.14966	2.48686	0.114801	0.839441	Unchanged
ENSG00000040487	protein_coding	solute carrier family 66 member 1 [Source:HGNC Symbol;Acc:HGNC:26001]	SLC66A1	-0.132174	3.29124	1.81975	0.177343	0.879271	Unchanged
ENSG00000040531	protein_coding	cystinosin, lysosomal cystine transporter [Source:HGNC Symbol;Acc:HGNC:2518]	CTNS	0.0692585	4.05939	0.95616	0.328156	0.933855	Unchanged
ENSG00000040608	protein_coding	reticulon 4 receptor [Source:HGNC Symbol;Acc:HGNC:18601]	RTN4R	0.0531962	2.65243	0.185823	0.666416	0.984459	Unchanged
ENSG00000040633	protein_coding	PHD finger protein 23 [Source:HGNC Symbol;Acc:HGNC:28428]	PHF23	-0.0703812	5.83509	2.16463	0.141219	0.864353	Unchanged
ENSG00000040933	protein_coding	inositol polyphosphate-4-phosphatase type I A [Source:HGNC Symbol;Acc:HGNC:6074]	INPP4A	-0.0707868	6.41309	2.95242	0.0857489	0.801844	Unchanged
ENSG00000041353	protein_coding	RAB27B, member RAS oncogene family [Source:HGNC Symbol;Acc:HGNC:9767]	RAB27B	-0.216401	1.01093	0.832987	0.36141	0.944943	Unchanged
ENSG00000041357	protein_coding	proteasome 20S subunit alpha 4 [Source:HGNC Symbol;Acc:HGNC:9533]	PSMA4	0.0662927	6.99116	3.17983	0.0745525	0.78501	Unchanged
ENSG00000041515	protein_coding	myosin XVI [Source:HGNC Symbol;Acc:HGNC:29822]	MYO16	-0.0539474	3.79769	0.530815	0.466265	0.969572	Unchanged
ENSG00000041802	protein_coding	large 60S subunit nuclear export GTPase 1 [Source:HGNC Symbol;Acc:HGNC:25652]	LSG1	0.0312308	6.10256	0.470305	0.492847	0.972467	Unchanged
ENSG00000041880	protein_coding	poly(ADP-ribose) polymerase family member 3 [Source:HGNC Symbol;Acc:HGNC:273]	PARP3	0.154597	2.83886	2.01877	0.155365	0.868348	Unchanged
ENSG00000041982	protein_coding	tenascin C [Source:HGNC Symbol;Acc:HGNC:5318]	TNC	-0.0712128	4.28541	1.06179	0.302808	0.925788	Unchanged
ENSG00000041988	protein_coding	THAP domain containing 3 [Source:HGNC Symbol;Acc:HGNC:20855]	THAP3	0.0266593	3.59515	0.0827954	0.773544	0.993101	Unchanged
ENSG00000042062	protein_coding	RIPOR family member 3 [Source:HGNC Symbol;Acc:HGNC:16168]	RIPOR3	0.290496	1.37486	3.92317	0.0476251	0.71434	Unchanged
ENSG00000042088	protein_coding	tyrosyl-DNA phosphodiesterase 1 [Source:HGNC Symbol;Acc:HGNC:18884]	TDP1	-0.10372	5.41975	3.23914	0.0718985	0.782824	Unchanged
ENSG00000042286	protein_coding	apoptosis inducing factor mitochondria associated 2 [Source:HGNC Symbol;Acc:HGNC:21411]	AIFM2	0.278517	1.11466	2.24318	0.134205	0.860073	Unchanged
ENSG00000042317	protein_coding	spermatogenesis associated 7 [Source:HGNC Symbol;Acc:HGNC:20423]	SPATA7	-0.0641316	2.98946	0.427969	0.512987	0.973159	Unchanged
ENSG00000042429	protein_coding	mediator complex subunit 17 [Source:HGNC Symbol;Acc:HGNC:2375]	MED17	-0.0117924	3.58154	0.0165094	0.897762	0.998208	Unchanged
ENSG00000042445	protein_coding	retinol saturase [Source:HGNC Symbol;Acc:HGNC:25991]	RETSAT	-0.00617095	3.84163	0.00534592	0.941714	0.998208	Unchanged
ENSG00000042493	protein_coding	capping actin protein, gelsolin like [Source:HGNC Symbol;Acc:HGNC:1474]	CAPG	0.56103	-1.68101	0.710634	0.399233	0.95338	Unchanged
ENSG00000042753	protein_coding	adaptor related protein complex 2 subunit sigma 1 [Source:HGNC Symbol;Acc:HGNC:565]	AP2S1	0.0154164	5.78019	0.0925136	0.761006	0.992571	Unchanged
ENSG00000042781	protein_coding	usherin [Source:HGNC Symbol;Acc:HGNC:12601]	USH2A	0.0402462	1.417	0.0594775	0.807324	0.996154	Unchanged
ENSG00000043093	protein_coding	defective in cullin neddylation 1 domain containing 1 [Source:HGNC Symbol;Acc:HGNC:18184]	DCUN1D1	-0.0882257	5.66006	2.72892	0.0985461	0.824773	Unchanged
ENSG00000043143	protein_coding	jade family PHD finger 2 [Source:HGNC Symbol;Acc:HGNC:22984]	JADE2	-0.0766275	3.85888	0.994984	0.318527	0.932223	Unchanged
ENSG00000043514	protein_coding	tRNA isopentenyltransferase 1 [Source:HGNC Symbol;Acc:HGNC:20286]	TRIT1	0.14283	4.89528	7.37985	0.00659587	0.435641	Unchanged
ENSG00000044090	protein_coding	cullin 7 [Source:HGNC Symbol;Acc:HGNC:21024]	CUL7	-0.00291463	5.47078	0.00367419	0.951666	0.998208	Unchanged
ENSG00000044115	protein_coding	catenin alpha 1 [Source:HGNC Symbol;Acc:HGNC:2509]	CTNNA1	0.0296324	7.54451	0.692668	0.405259	0.954361	Unchanged
ENSG00000044446	protein_coding	phosphorylase kinase regulatory subunit alpha 2 [Source:HGNC Symbol;Acc:HGNC:8926]	PHKA2	0.0244839	5.21198	0.233808	0.628714	0.980546	Unchanged
ENSG00000044459	protein_coding	centlein [Source:HGNC Symbol;Acc:HGNC:23432]	CNTLN	0.00416688	5.56185	0.00517052	0.942676	0.998208	Unchanged
ENSG00000044574	protein_coding	heat shock protein family A (Hsp70) member 5 [Source:HGNC Symbol;Acc:HGNC:5238]	HSPA5	-0.0432901	8.57566	0.800478	0.37095	0.94626	Unchanged
ENSG00000046647	protein_coding	gem nuclear organelle associated protein 8 [Source:HGNC Symbol;Acc:HGNC:26044]	GEMIN8	0.00237682	4.86396	0.00180582	0.966104	0.998791	Unchanged
ENSG00000046651	protein_coding	OFD1 centriole and centriolar satellite protein [Source:HGNC Symbol;Acc:HGNC:2567]	OFD1	0.0094095	5.78892	0.0348148	0.851984	0.998208	Unchanged
ENSG00000046653	protein_coding	glycoprotein M6B [Source:HGNC Symbol;Acc:HGNC:4461]	GPM6B	-0.0159677	4.22543	0.0548876	0.814767	0.996176	Unchanged
ENSG00000046774	protein_coding	MAGE family member C2 [Source:HGNC Symbol;Acc:HGNC:13574]	MAGEC2	0.0765694	-0.552226	0.0465833	0.829119	0.996176	Unchanged
ENSG00000047056	protein_coding	WD repeat domain 37 [Source:HGNC Symbol;Acc:HGNC:31406]	WDR37	-0.100297	5.14655	2.88279	0.089531	0.809866	Unchanged
ENSG00000047188	protein_coding	YTH domain containing 2 [Source:HGNC Symbol;Acc:HGNC:24721]	YTHDC2	-0.0458723	6.56718	1.17599	0.278174	0.917499	Unchanged
ENSG00000047230	protein_coding	CTP synthase 2 [Source:HGNC Symbol;Acc:HGNC:2520]	CTPS2	-0.00863102	6.00593	0.0393067	0.842842	0.996518	Unchanged
ENSG00000047249	protein_coding	ATPase H+ transporting V1 subunit H [Source:HGNC Symbol;Acc:HGNC:18303]	ATP6V1H	-0.0118333	5.01323	0.0367905	0.847892	0.998123	Unchanged
ENSG00000047315	protein_coding	RNA polymerase II subunit B [Source:HGNC Symbol;Acc:HGNC:9188]	POLR2B	0.00596808	8.04861	0.0277866	0.867611	0.998208	Unchanged
ENSG00000047346	protein_coding	family with sequence similarity 214 member A [Source:HGNC Symbol;Acc:HGNC:25609]	FAM214A	-0.0963438	4.88013	2.97243	0.0846943	0.799511	Unchanged
ENSG00000047410	protein_coding	translocated promoter region, nuclear basket protein [Source:HGNC Symbol;Acc:HGNC:12017]	TPR	0.0733555	9.02422	1.46248	0.226536	0.901346	Unchanged
ENSG00000047578	protein_coding	katanin interacting protein [Source:HGNC Symbol;Acc:HGNC:29068]	KATNIP	-0.0313926	5.00901	0.254037	0.614247	0.980546	Unchanged
ENSG00000047579	protein_coding	dystrobrevin binding protein 1 [Source:HGNC Symbol;Acc:HGNC:17328]	DTNBP1	0.0732209	3.05879	0.539848	0.462496	0.969572	Unchanged
ENSG00000047597	protein_coding	X-linked Kx blood group [Source:HGNC Symbol;Acc:HGNC:12811]	XK	-0.0649343	1.86858	0.18584	0.666402	0.984459	Unchanged
ENSG00000047621	protein_coding	chromosome 12 open reading frame 4 [Source:HGNC Symbol;Acc:HGNC:1184]	C12orf4	0.0734815	4.99841	1.4061	0.235704	0.90543	Unchanged
ENSG00000047634	protein_coding	Scm polycomb group protein like 1 [Source:HGNC Symbol;Acc:HGNC:10580]	SCML1	0.0197953	4.92335	0.0956904	0.757064	0.992383	Unchanged
ENSG00000047644	protein_coding	WWC family member 3 [Source:HGNC Symbol;Acc:HGNC:29237]	WWC3	-0.0221951	5.10211	0.133052	0.715289	0.989751	Unchanged
ENSG00000047648	protein_coding	Rho GTPase activating protein 6 [Source:HGNC Symbol;Acc:HGNC:676]	ARHGAP6	-0.172967	-1.26293	0.122184	0.726678	0.990209	Unchanged
ENSG00000047662	protein_coding	family with sequence similarity 184 member B [Source:HGNC Symbol;Acc:HGNC:29235]	FAM184B	0.389275	0.0977723	1.71968	0.189735	0.884529	Unchanged
ENSG00000047849	protein_coding	microtubule associated protein 4 [Source:HGNC Symbol;Acc:HGNC:6862]	MAP4	-0.00563584	7.99967	0.0286808	0.865518	0.998208	Unchanged
ENSG00000047932	protein_coding	golgi associated PDZ and coiled-coil motif containing [Source:HGNC Symbol;Acc:HGNC:17643]	GOPC	-0.079143	6.34083	3.29541	0.0694736	0.782824	Unchanged
ENSG00000048028	protein_coding	ubiquitin specific peptidase 28 [Source:HGNC Symbol;Acc:HGNC:12625]	USP28	-0.157833	5.55245	9.55858	0.00199017	0.262253	Unchanged
ENSG00000048052	protein_coding	histone deacetylase 9 [Source:HGNC Symbol;Acc:HGNC:14065]	HDAC9	-0.00265057	7.88844	0.00622507	0.937113	0.998208	Unchanged
ENSG00000048140	protein_coding	tetraspanin 17 [Source:HGNC Symbol;Acc:HGNC:13594]	TSPAN17	0.0405961	5.68873	0.623714	0.429671	0.960496	Unchanged
ENSG00000048162	protein_coding	NOP16 nucleolar protein [Source:HGNC Symbol;Acc:HGNC:26934]	NOP16	0.0120517	5.24003	0.0512062	0.820978	0.996176	Unchanged
ENSG00000048342	protein_coding	coiled-coil and C2 domain containing 2A [Source:HGNC Symbol;Acc:HGNC:29253]	CC2D2A	0.0278016	3.80564	0.107655	0.742829	0.990714	Unchanged
ENSG00000048392	protein_coding	ribonucleotide reductase regulatory TP53 inducible subunit M2B [Source:HGNC Symbol;Acc:HGNC:17296]	RRM2B	0.0133656	4.52597	0.0386636	0.844117	0.996834	Unchanged
ENSG00000048405	protein_coding	zinc finger protein 800 [Source:HGNC Symbol;Acc:HGNC:27267]	ZNF800	-0.134514	6.09298	5.77604	0.0162461	0.548437	Unchanged
ENSG00000048471	protein_coding	sorting nexin 29 [Source:HGNC Symbol;Acc:HGNC:30542]	SNX29	-0.0619421	4.49982	0.99158	0.319357	0.932532	Unchanged
ENSG00000048540	protein_coding	LIM domain only 3 [Source:HGNC Symbol;Acc:HGNC:6643]	LMO3	-0.0106964	5.66482	0.0341406	0.853408	0.998208	Unchanged
ENSG00000048544	protein_coding	mitochondrial ribosomal protein S10 [Source:HGNC Symbol;Acc:HGNC:14502]	MRPS10	-0.0438142	5.40667	0.801602	0.370615	0.94626	Unchanged
ENSG00000048545	protein_coding	guanylate cyclase activator 1A [Source:HGNC Symbol;Acc:HGNC:4678]	GUCA1A	-0.824249	-1.30339	3.56946	0.0588513	0.753885	Unchanged
ENSG00000048649	protein_coding	remodeling and spacing factor 1 [Source:HGNC Symbol;Acc:HGNC:18118]	RSF1	-0.0343333	8.11233	0.522661	0.469709	0.969572	Unchanged
ENSG00000048707	protein_coding	vacuolar protein sorting 13 homolog D [Source:HGNC Symbol;Acc:HGNC:23595]	VPS13D	-0.019716	6.41902	0.179003	0.672232	0.98482	Unchanged
ENSG00000048740	protein_coding	CUGBP Elav-like family member 2 [Source:HGNC Symbol;Acc:HGNC:2550]	CELF2	0.0651077	3.34195	0.448763	0.502923	0.972467	Unchanged
ENSG00000048828	protein_coding	family with sequence similarity 120A [Source:HGNC Symbol;Acc:HGNC:13247]	FAM120A	-0.075391	7.28406	4.64316	0.0311775	0.648999	Unchanged
ENSG00000048991	protein_coding	R3H domain containing 1 [Source:HGNC Symbol;Acc:HGNC:9757]	R3HDM1	-0.0363806	7.00779	0.862298	0.353096	0.943851	Unchanged
ENSG00000049089	protein_coding	collagen type IX alpha 2 chain [Source:HGNC Symbol;Acc:HGNC:2218]	COL9A2	0.156579	2.56861	2.06053	0.151158	0.86658	Unchanged
ENSG00000049130	protein_coding	KIT ligand [Source:HGNC Symbol;Acc:HGNC:6343]	KITLG	0.00762175	3.6419	0.00656298	0.935432	0.998208	Unchanged
ENSG00000049167	protein_coding	ERCC excision repair 8, CSA ubiquitin ligase complex subunit [Source:HGNC Symbol;Acc:HGNC:3439]	ERCC8	0.0724104	5.09444	1.7771	0.182506	0.88001	Unchanged
ENSG00000049192	protein_coding	ADAM metallopeptidase with thrombospondin type 1 motif 6 [Source:HGNC Symbol;Acc:HGNC:222]	ADAMTS6	0.136402	1.34323	0.796097	0.372263	0.946588	Unchanged
ENSG00000049239	protein_coding	hexose-6-phosphate dehydrogenase/glucose 1-dehydrogenase [Source:HGNC Symbol;Acc:HGNC:4795]	H6PD	0.0102356	6.13283	0.059926	0.806613	0.996154	Unchanged
ENSG00000049245	protein_coding	vesicle associated membrane protein 3 [Source:HGNC Symbol;Acc:HGNC:12644]	VAMP3	-0.0109532	5.61691	0.0359453	0.849628	0.998179	Unchanged
ENSG00000049246	protein_coding	period circadian regulator 3 [Source:HGNC Symbol;Acc:HGNC:8847]	PER3	0.103495	5.50511	4.11188	0.0425829	0.69096	Unchanged
ENSG00000049323	protein_coding	latent transforming growth factor beta binding protein 1 [Source:HGNC Symbol;Acc:HGNC:6714]	LTBP1	-0.197837	1.1887	1.3758	0.240819	0.906328	Unchanged
ENSG00000049449	protein_coding	reticulocalbin 1 [Source:HGNC Symbol;Acc:HGNC:9934]	RCN1	-0.0553787	5.18618	0.972662	0.324017	0.933855	Unchanged
ENSG00000049540	protein_coding	elastin [Source:HGNC Symbol;Acc:HGNC:3327]	ELN	0.0337655	5.81657	0.338355	0.56078	0.979905	Unchanged
ENSG00000049541	protein_coding	replication factor C subunit 2 [Source:HGNC Symbol;Acc:HGNC:9970]	RFC2	0.0202626	6.63843	0.233722	0.628778	0.980546	Unchanged
ENSG00000049618	protein_coding	AT-rich interaction domain 1B [Source:HGNC Symbol;Acc:HGNC:18040]	ARID1B	0.0368867	7.8257	0.811924	0.367552	0.945863	Unchanged
ENSG00000049656	protein_coding	CLPTM1 like [Source:HGNC Symbol;Acc:HGNC:24308]	CLPTM1L	-0.00427395	7.15534	0.0106547	0.917787	0.998208	Unchanged
ENSG00000049759	protein_coding	NEDD4 like E3 ubiquitin protein ligase [Source:HGNC Symbol;Acc:HGNC:7728]	NEDD4L	-0.000535946	5.49194	0.000106029	0.991784	0.999523	Unchanged
ENSG00000049768	protein_coding	forkhead box P3 [Source:HGNC Symbol;Acc:HGNC:6106]	FOXP3	0.0727036	-0.722137	0.037002	0.847461	0.998123	Unchanged
ENSG00000049769	protein_coding	protein phosphatase 1 regulatory subunit 3F [Source:HGNC Symbol;Acc:HGNC:14944]	PPP1R3F	-0.00861902	3.56488	0.00843582	0.92682	0.998208	Unchanged
ENSG00000049860	protein_coding	hexosaminidase subunit beta [Source:HGNC Symbol;Acc:HGNC:4879]	HEXB	-0.0515648	4.44629	0.538226	0.463169	0.969572	Unchanged
ENSG00000049883	protein_coding	pentatricopeptide repeat domain 2 [Source:HGNC Symbol;Acc:HGNC:25734]	PTCD2	-0.0933487	4.97198	2.75751	0.0967986	0.820367	Unchanged
ENSG00000050030	protein_coding	neurite extension and migration factor [Source:HGNC Symbol;Acc:HGNC:29433]	NEXMIF	-0.00431021	5.42404	0.0069982	0.933331	0.998208	Unchanged
ENSG00000050130	protein_coding	JNK1/MAPK8 associated membrane protein [Source:HGNC Symbol;Acc:HGNC:20184]	JKAMP	-0.0102845	5.68917	0.0422044	0.837231	0.996176	Unchanged
ENSG00000050165	protein_coding	dickkopf WNT signaling pathway inhibitor 3 [Source:HGNC Symbol;Acc:HGNC:2893]	DKK3	0.0147519	5.52075	0.0773919	0.780863	0.993101	Unchanged
ENSG00000050344	protein_coding	nuclear factor, erythroid 2 like 3 [Source:HGNC Symbol;Acc:HGNC:7783]	NFE2L3	-0.0171752	5.64875	0.128873	0.719603	0.989832	Unchanged
ENSG00000050393	protein_coding	mitochondrial calcium uniporter regulator 1 [Source:HGNC Symbol;Acc:HGNC:21097]	MCUR1	-0.0355745	6.4647	0.683084	0.408527	0.954361	Unchanged
ENSG00000050405	protein_coding	LIM domain and actin binding 1 [Source:HGNC Symbol;Acc:HGNC:24636]	LIMA1	-0.0542363	5.50124	1.18396	0.276551	0.916516	Unchanged
ENSG00000050426	protein_coding	LETM1 domain containing 1 [Source:HGNC Symbol;Acc:HGNC:24241]	LETMD1	0.072549	5.64446	2.26751	0.132112	0.856297	Unchanged
ENSG00000050438	protein_coding	solute carrier family 4 member 8 [Source:HGNC Symbol;Acc:HGNC:11034]	SLC4A8	-0.0363179	7.03214	0.740541	0.389488	0.951351	Unchanged
ENSG00000050555	protein_coding	laminin subunit gamma 3 [Source:HGNC Symbol;Acc:HGNC:6494]	LAMC3	0.802305	-0.648036	4.94276	0.0262001	0.627202	Unchanged
ENSG00000050628	protein_coding	prostaglandin E receptor 3 [Source:HGNC Symbol;Acc:HGNC:9595]	PTGER3	-0.0666801	1.57932	0.127463	0.721077	0.990007	Unchanged
ENSG00000050748	protein_coding	mitogen-activated protein kinase 9 [Source:HGNC Symbol;Acc:HGNC:6886]	MAPK9	-0.0492164	5.41559	0.794575	0.37272	0.946714	Unchanged
ENSG00000050767	protein_coding	collagen type XXIII alpha 1 chain [Source:HGNC Symbol;Acc:HGNC:22990]	COL23A1	-0.0628258	2.03801	0.200222	0.654541	0.982888	Unchanged
ENSG00000050820	protein_coding	BCAR1 scaffold protein, Cas family member [Source:HGNC Symbol;Acc:HGNC:971]	BCAR1	-0.0793049	5.01987	1.64514	0.199622	0.890671	Unchanged
ENSG00000051009	protein_coding	family with sequence similarity 160 member A2 [Source:HGNC Symbol;Acc:HGNC:25378]	FAM160A2	0.00448193	4.25473	0.00427399	0.947875	0.998208	Unchanged
ENSG00000051108	protein_coding	homocysteine inducible ER protein with ubiquitin like domain 1 [Source:HGNC Symbol;Acc:HGNC:13744]	HERPUD1	0.00659272	4.98256	0.00793117	0.929037	0.998208	Unchanged
ENSG00000051128	protein_coding	homer scaffold protein 3 [Source:HGNC Symbol;Acc:HGNC:17514]	HOMER3	0.0277274	2.77381	0.0564163	0.812253	0.996154	Unchanged
ENSG00000051180	protein_coding	RAD51 recombinase [Source:HGNC Symbol;Acc:HGNC:9817]	RAD51	-0.0289788	5.56128	0.323837	0.569311	0.980546	Unchanged
ENSG00000051341	protein_coding	DNA polymerase theta [Source:HGNC Symbol;Acc:HGNC:9186]	POLQ	-0.000846186	6.46735	0.000319247	0.985745	0.999523	Unchanged
ENSG00000051382	protein_coding	phosphatidylinositol-4,5-bisphosphate 3-kinase catalytic subunit beta [Source:HGNC Symbol;Acc:HGNC:8976]	PIK3CB	0.0232269	4.57237	0.139641	0.708638	0.987631	Unchanged
ENSG00000051523	protein_coding	cytochrome b-245 alpha chain [Source:HGNC Symbol;Acc:HGNC:2577]	CYBA	0.0163278	3.44391	0.0307127	0.860883	0.998208	Unchanged
ENSG00000051596	protein_coding	THO complex 3 [Source:HGNC Symbol;Acc:HGNC:19072]	THOC3	-0.0732369	3.31524	0.422879	0.515504	0.973159	Unchanged
ENSG00000051620	protein_coding	heme binding protein 2 [Source:HGNC Symbol;Acc:HGNC:15716]	HEBP2	-0.176804	0.742389	0.547752	0.459238	0.969572	Unchanged
ENSG00000051825	protein_coding	M-phase phosphoprotein 9 [Source:HGNC Symbol;Acc:HGNC:7215]	MPHOSPH9	-0.0369159	6.76018	0.661043	0.416192	0.95664	Unchanged
ENSG00000052126	protein_coding	pleckstrin homology domain containing A5 [Source:HGNC Symbol;Acc:HGNC:30036]	PLEKHA5	-0.00492404	4.32981	0.00681972	0.934184	0.998208	Unchanged
ENSG00000052723	protein_coding	suppressor of IKBKE 1 [Source:HGNC Symbol;Acc:HGNC:26119]	SIKE1	-0.0106048	6.27014	0.0566313	0.811902	0.996154	Unchanged
ENSG00000052749	protein_coding	ribosomal RNA processing 12 homolog [Source:HGNC Symbol;Acc:HGNC:29100]	RRP12	0.0392658	6.50277	0.928376	0.335285	0.936669	Unchanged
ENSG00000052795	protein_coding	folliculin interacting protein 2 [Source:HGNC Symbol;Acc:HGNC:29280]	FNIP2	0.00276635	5.55087	0.00307594	0.955771	0.998717	Unchanged
ENSG00000052802	protein_coding	methylsterol monooxygenase 1 [Source:HGNC Symbol;Acc:HGNC:10545]	MSMO1	0.142318	5.73244	8.61193	0.00333968	0.33697	Unchanged
ENSG00000052841	protein_coding	tetratricopeptide repeat domain 17 [Source:HGNC Symbol;Acc:HGNC:25596]	TTC17	-0.0558116	6.92343	2.13988	0.143513	0.864353	Unchanged
ENSG00000053108	protein_coding	follistatin like 4 [Source:HGNC Symbol;Acc:HGNC:21389]	FSTL4	0.34983	1.08973	3.08308	0.0791107	0.787018	Unchanged
ENSG00000053254	protein_coding	forkhead box N3 [Source:HGNC Symbol;Acc:HGNC:1928]	FOXN3	0.0251775	7.69439	0.528279	0.467331	0.969572	Unchanged
ENSG00000053371	protein_coding	aldo-keto reductase family 7 member A2 [Source:HGNC Symbol;Acc:HGNC:389]	AKR7A2	0.00314191	4.37589	0.00207145	0.963698	0.998791	Unchanged
ENSG00000053372	protein_coding	MRT4 homolog, ribosome maturation factor [Source:HGNC Symbol;Acc:HGNC:18477]	MRTO4	0.0082803	6.27533	0.024835	0.874779	0.998208	Unchanged
ENSG00000053438	protein_coding	neuronatin [Source:HGNC Symbol;Acc:HGNC:7860]	NNAT	0.0338836	6.90061	0.549481	0.45853	0.969572	Unchanged
ENSG00000053501	protein_coding	unconventional SNARE in the ER 1 [Source:HGNC Symbol;Acc:HGNC:30882]	USE1	-0.110469	3.50236	1.88852	0.169369	0.874921	Unchanged
ENSG00000053524	protein_coding	MCF.2 cell line derived transforming sequence-like 2 [Source:HGNC Symbol;Acc:HGNC:30319]	MCF2L2	0.064301	2.89638	0.347263	0.555667	0.979393	Unchanged
ENSG00000053747	protein_coding	laminin subunit alpha 3 [Source:HGNC Symbol;Acc:HGNC:6483]	LAMA3	0.014417	1.756	0.00791725	0.929099	0.998208	Unchanged
ENSG00000053770	protein_coding	adaptor related protein complex 5 subunit mu 1 [Source:HGNC Symbol;Acc:HGNC:20192]	AP5M1	-0.0190252	6.20938	0.196689	0.657407	0.983802	Unchanged
ENSG00000053900	protein_coding	anaphase promoting complex subunit 4 [Source:HGNC Symbol;Acc:HGNC:19990]	ANAPC4	-0.0182532	5.19115	0.103945	0.747146	0.99131	Unchanged
ENSG00000053918	protein_coding	potassium voltage-gated channel subfamily Q member 1 [Source:HGNC Symbol;Acc:HGNC:6294]	KCNQ1	-0.0177115	3.69298	0.0466628	0.828976	0.996176	Unchanged
ENSG00000054116	protein_coding	trafficking protein particle complex 3 [Source:HGNC Symbol;Acc:HGNC:19942]	TRAPPC3	0.0447073	4.9727	0.535102	0.46447	0.969572	Unchanged
ENSG00000054118	protein_coding	thyroid hormone receptor associated protein 3 [Source:HGNC Symbol;Acc:HGNC:22964]	THRAP3	0.0898431	8.00543	6.6024	0.0101841	0.474527	Unchanged
ENSG00000054148	protein_coding	phosphohistidine phosphatase 1 [Source:HGNC Symbol;Acc:HGNC:30033]	PHPT1	-0.001759	5.01826	0.000638113	0.979847	0.999244	Unchanged
ENSG00000054179	protein_coding	ectonucleoside triphosphate diphosphohydrolase 2 [Source:HGNC Symbol;Acc:HGNC:3364]	ENTPD2	0.416345	-1.29375	1.10833	0.292446	0.922958	Unchanged
ENSG00000054267	protein_coding	AT-rich interaction domain 4B [Source:HGNC Symbol;Acc:HGNC:15550]	ARID4B	-0.0719013	7.04844	2.60006	0.106859	0.832438	Unchanged
ENSG00000054277	protein_coding	opsin 3 [Source:HGNC Symbol;Acc:HGNC:14007]	OPN3	-0.0548101	5.04644	0.842476	0.358689	0.944807	Unchanged
ENSG00000054282	protein_coding	SHH signaling and ciliogenesis regulator SDCCAG8 [Source:HGNC Symbol;Acc:HGNC:10671]	SDCCAG8	0.0426187	5.29349	0.578355	0.446958	0.967042	Unchanged
ENSG00000054356	protein_coding	protein tyrosine phosphatase receptor type N [Source:HGNC Symbol;Acc:HGNC:9676]	PTPRN	-0.0270867	6.32747	0.361359	0.547753	0.978558	Unchanged
ENSG00000054392	protein_coding	hedgehog acyltransferase [Source:HGNC Symbol;Acc:HGNC:18270]	HHAT	-0.0230266	5.018	0.179821	0.671528	0.98482	Unchanged
ENSG00000054523	protein_coding	kinesin family member 1B [Source:HGNC Symbol;Acc:HGNC:16636]	KIF1B	-0.0549377	8.55038	3.12809	0.0769538	0.787018	Unchanged
ENSG00000054598	protein_coding	forkhead box C1 [Source:HGNC Symbol;Acc:HGNC:3800]	FOXC1	0.00162621	5.67788	0.000420251	0.983644	0.999523	Unchanged
ENSG00000054611	protein_coding	TBC1 domain family member 22A [Source:HGNC Symbol;Acc:HGNC:1309]	TBC1D22A	-0.0192673	4.38486	0.0780765	0.779921	0.993101	Unchanged
ENSG00000054654	protein_coding	spectrin repeat containing nuclear envelope protein 2 [Source:HGNC Symbol;Acc:HGNC:17084]	SYNE2	-0.0235228	9.25141	0.0926673	0.760813	0.992571	Unchanged
ENSG00000054690	protein_coding	pleckstrin homology, MyTH4 and FERM domain containing H1 [Source:HGNC Symbol;Acc:HGNC:17733]	PLEKHH1	0.0583872	4.13349	0.640339	0.423588	0.958761	Unchanged
ENSG00000054793	protein_coding	ATPase phospholipid transporting 9A (putative) [Source:HGNC Symbol;Acc:HGNC:13540]	ATP9A	0.0149673	7.15096	0.125165	0.723499	0.990209	Unchanged
ENSG00000054803	protein_coding	cerebellin 4 precursor [Source:HGNC Symbol;Acc:HGNC:16231]	CBLN4	0.00705587	3.86861	0.00545429	0.941127	0.998208	Unchanged
ENSG00000054965	protein_coding	family with sequence similarity 168 member A [Source:HGNC Symbol;Acc:HGNC:28999]	FAM168A	-0.0126945	7.35101	0.139986	0.708295	0.987626	Unchanged
ENSG00000054967	protein_coding	RELT TNF receptor [Source:HGNC Symbol;Acc:HGNC:13764]	RELT	-0.111552	4.10093	1.74633	0.186339	0.882557	Unchanged
ENSG00000054983	protein_coding	galactosylceramidase [Source:HGNC Symbol;Acc:HGNC:4115]	GALC	0.0035742	4.97281	0.00311145	0.955517	0.998687	Unchanged
ENSG00000055044	protein_coding	NOP58 ribonucleoprotein [Source:HGNC Symbol;Acc:HGNC:29926]	NOP58	0.0243367	6.97577	0.281011	0.596039	0.980546	Unchanged
ENSG00000055070	protein_coding	SUZ RNA binding domain containing 1 [Source:HGNC Symbol;Acc:HGNC:30232]	SZRD1	-0.00324021	7.2135	0.00703621	0.93315	0.998208	Unchanged
ENSG00000055118	protein_coding	potassium voltage-gated channel subfamily H member 2 [Source:HGNC Symbol;Acc:HGNC:6251]	KCNH2	-0.0135379	7.62151	0.0765327	0.782052	0.993101	Unchanged
ENSG00000055130	protein_coding	cullin 1 [Source:HGNC Symbol;Acc:HGNC:2551]	CUL1	-0.0130808	7.07254	0.137052	0.711229	0.98813	Unchanged
ENSG00000055147	protein_coding	family with sequence similarity 114 member A2 [Source:HGNC Symbol;Acc:HGNC:1333]	FAM114A2	0.0212375	4.84844	0.12186	0.727025	0.990209	Unchanged
ENSG00000055163	protein_coding	cytoplasmic FMR1 interacting protein 2 [Source:HGNC Symbol;Acc:HGNC:13760]	CYFIP2	-0.0384008	6.73579	0.893499	0.344531	0.941492	Unchanged
ENSG00000055208	protein_coding	TGF-beta activated kinase 1 (MAP3K7) binding protein 2 [Source:HGNC Symbol;Acc:HGNC:17075]	TAB2	-0.0809722	6.62251	4.3039	0.0380252	0.677599	Unchanged
ENSG00000055211	protein_coding	glycoprotein integral membrane 1 [Source:HGNC Symbol;Acc:HGNC:21074]	GINM1	-0.0573413	4.09965	0.508611	0.475741	0.969572	Unchanged
ENSG00000055332	protein_coding	eukaryotic translation initiation factor 2 alpha kinase 2 [Source:HGNC Symbol;Acc:HGNC:9437]	EIF2AK2	-0.0374977	7.78114	0.969661	0.324765	0.933855	Unchanged
ENSG00000055483	protein_coding	ubiquitin specific peptidase 36 [Source:HGNC Symbol;Acc:HGNC:20062]	USP36	0.0022009	6.33971	0.00223352	0.962306	0.998791	Unchanged
ENSG00000055609	protein_coding	lysine methyltransferase 2C [Source:HGNC Symbol;Acc:HGNC:13726]	KMT2C	-0.0277843	8.37304	0.60227	0.437713	0.964645	Unchanged
ENSG00000055917	protein_coding	pumilio RNA binding family member 2 [Source:HGNC Symbol;Acc:HGNC:14958]	PUM2	-0.0266	8.59041	0.695211	0.404398	0.954361	Unchanged
ENSG00000055950	protein_coding	mitochondrial ribosomal protein L43 [Source:HGNC Symbol;Acc:HGNC:14517]	MRPL43	0.17204	5.08499	10.1999	0.00140449	0.222576	Unchanged
ENSG00000055955	protein_coding	inter-alpha-trypsin inhibitor heavy chain 4 [Source:HGNC Symbol;Acc:HGNC:6169]	ITIH4	0.457743	-1.36733	0.883465	0.347254	0.942994	Unchanged
ENSG00000056050	protein_coding	histone PARylation factor 1 [Source:HGNC Symbol;Acc:HGNC:26051]	HPF1	0.025689	5.44294	0.225596	0.634809	0.980546	Unchanged
ENSG00000056097	protein_coding	zinc finger RNA binding protein [Source:HGNC Symbol;Acc:HGNC:17277]	ZFR	-0.00229531	7.37628	0.00443694	0.946892	0.998208	Unchanged
ENSG00000056277	protein_coding	zinc finger protein 280C [Source:HGNC Symbol;Acc:HGNC:25955]	ZNF280C	0.12109	5.25056	2.91875	0.0875555	0.804881	Unchanged
ENSG00000056291	protein_coding	neuropeptide FF receptor 2 [Source:HGNC Symbol;Acc:HGNC:4525]	NPFFR2	-0.0501426	4.06117	0.509847	0.475205	0.969572	Unchanged
ENSG00000056487	protein_coding	PHD finger protein 21B [Source:HGNC Symbol;Acc:HGNC:25161]	PHF21B	0.030349	7.44224	0.643512	0.422442	0.958316	Unchanged
ENSG00000056558	protein_coding	TNF receptor associated factor 1 [Source:HGNC Symbol;Acc:HGNC:12031]	TRAF1	-0.262225	0.528889	1.03719	0.308475	0.92864	Unchanged
ENSG00000056586	protein_coding	ring finger and CCCH-type domains 2 [Source:HGNC Symbol;Acc:HGNC:21461]	RC3H2	-0.0649855	7.63161	2.96954	0.084846	0.799511	Unchanged
ENSG00000056736	protein_coding	interleukin 17 receptor B [Source:HGNC Symbol;Acc:HGNC:18015]	IL17RB	0.0273288	2.36393	0.0366459	0.848188	0.998123	Unchanged
ENSG00000056972	protein_coding	TRAF3 interacting protein 2 [Source:HGNC Symbol;Acc:HGNC:1343]	TRAF3IP2	0.065283	0.927696	0.120109	0.728916	0.990209	Unchanged
ENSG00000056998	protein_coding	glycogenin 2 [Source:HGNC Symbol;Acc:HGNC:4700]	GYG2	-0.00675367	2.98526	0.00475599	0.945019	0.998208	Unchanged
ENSG00000057019	protein_coding	discoidin, CUB and LCCL domain containing 2 [Source:HGNC Symbol;Acc:HGNC:24627]	DCBLD2	-0.0507233	6.43043	1.80946	0.178573	0.879851	Unchanged
ENSG00000057252	protein_coding	sterol O-acyltransferase 1 [Source:HGNC Symbol;Acc:HGNC:11177]	SOAT1	-0.0419765	5.33286	0.505307	0.477178	0.969572	Unchanged
ENSG00000057294	protein_coding	plakophilin 2 [Source:HGNC Symbol;Acc:HGNC:9024]	PKP2	-0.00656041	3.56642	0.00717567	0.932492	0.998208	Unchanged
ENSG00000057593	protein_coding	coagulation factor VII [Source:HGNC Symbol;Acc:HGNC:3544]	F7	0.468506	-0.67444	2.05679	0.151529	0.8668	Unchanged
ENSG00000057608	protein_coding	GDP dissociation inhibitor 2 [Source:HGNC Symbol;Acc:HGNC:4227]	GDI2	-0.0233811	8.08972	0.402635	0.525732	0.97327	Unchanged
ENSG00000057663	protein_coding	autophagy related 5 [Source:HGNC Symbol;Acc:HGNC:589]	ATG5	-0.0389615	4.47731	0.385738	0.534548	0.975746	Unchanged
ENSG00000057704	protein_coding	transmembrane and coiled-coil domain family 3 [Source:HGNC Symbol;Acc:HGNC:29199]	TMCC3	-0.264931	0.75451	1.16713	0.279991	0.918563	Unchanged
ENSG00000057757	protein_coding	PITH domain containing 1 [Source:HGNC Symbol;Acc:HGNC:25022]	PITHD1	-0.0813422	5.36356	2.49937	0.113892	0.837365	Unchanged
ENSG00000057935	protein_coding	metastasis associated 1 family member 3 [Source:HGNC Symbol;Acc:HGNC:23784]	MTA3	0.0644396	6.80598	2.82787	0.092641	0.814688	Unchanged
ENSG00000058056	protein_coding	ubiquitin specific peptidase 13 [Source:HGNC Symbol;Acc:HGNC:12611]	USP13	-0.0234605	5.84312	0.227069	0.633706	0.980546	Unchanged
ENSG00000058063	protein_coding	ATPase phospholipid transporting 11B (putative) [Source:HGNC Symbol;Acc:HGNC:13553]	ATP11B	-0.0858368	6.2161	3.20918	0.0732263	0.782824	Unchanged
ENSG00000058091	protein_coding	cyclin dependent kinase 14 [Source:HGNC Symbol;Acc:HGNC:8883]	CDK14	-0.0322189	6.54342	0.60385	0.437113	0.964617	Unchanged
ENSG00000058262	protein_coding	SEC61 translocon subunit alpha 1 [Source:HGNC Symbol;Acc:HGNC:18276]	SEC61A1	-0.00980089	7.92071	0.0511478	0.821078	0.996176	Unchanged
ENSG00000058272	protein_coding	protein phosphatase 1 regulatory subunit 12A [Source:HGNC Symbol;Acc:HGNC:7618]	PPP1R12A	0.0317078	6.42253	0.578264	0.446994	0.967042	Unchanged
ENSG00000058335	protein_coding	Ras protein specific guanine nucleotide releasing factor 1 [Source:HGNC Symbol;Acc:HGNC:9875]	RASGRF1	-1.96507	-1.79272	4.55994	0.0327282	0.655759	Unchanged
ENSG00000058404	protein_coding	calcium/calmodulin dependent protein kinase II beta [Source:HGNC Symbol;Acc:HGNC:1461]	CAMK2B	-0.0543116	3.77416	0.471604	0.49225	0.972467	Unchanged
ENSG00000058453	protein_coding	ciliary rootlet coiled-coil, rootletin [Source:HGNC Symbol;Acc:HGNC:21299]	CROCC	-0.00270064	6.15812	0.00227721	0.961939	0.998791	Unchanged
ENSG00000058600	protein_coding	RNA polymerase III subunit E [Source:HGNC Symbol;Acc:HGNC:30347]	POLR3E	0.0762969	6.02359	2.81632	0.0933101	0.816866	Unchanged
ENSG00000058668	protein_coding	ATPase plasma membrane Ca2+ transporting 4 [Source:HGNC Symbol;Acc:HGNC:817]	ATP2B4	-0.0272174	5.86409	0.43024	0.511871	0.973159	Unchanged
ENSG00000058673	protein_coding	zinc finger CCCH-type containing 11A [Source:HGNC Symbol;Acc:HGNC:29093]	ZC3H11A	-0.177346	-0.0434241	0.418831	0.517521	0.973159	Unchanged
ENSG00000058729	protein_coding	RIO kinase 2 [Source:HGNC Symbol;Acc:HGNC:18999]	RIOK2	-0.133133	4.56938	4.15389	0.0415391	0.685785	Unchanged
ENSG00000058799	protein_coding	Yip1 domain family member 1 [Source:HGNC Symbol;Acc:HGNC:25231]	YIPF1	-0.0683793	3.65785	0.666693	0.414207	0.95664	Unchanged
ENSG00000058804	protein_coding	NDC1 transmembrane nucleoporin [Source:HGNC Symbol;Acc:HGNC:25525]	NDC1	0.042877	7.30001	1.14542	0.28451	0.920218	Unchanged
ENSG00000058866	protein_coding	diacylglycerol kinase gamma [Source:HGNC Symbol;Acc:HGNC:2853]	DGKG	0.108309	0.487012	0.220384	0.638748	0.981605	Unchanged
ENSG00000059122	protein_coding	FLYWCH-type zinc finger 1 [Source:HGNC Symbol;Acc:HGNC:25404]	FLYWCH1	-0.0416364	4.82965	0.411428	0.521246	0.97327	Unchanged
ENSG00000059145	protein_coding	unk like zinc finger [Source:HGNC Symbol;Acc:HGNC:14184]	UNKL	-0.0205025	4.57751	0.100484	0.751249	0.992067	Unchanged
ENSG00000059377	protein_coding	thromboxane A synthase 1 [Source:HGNC Symbol;Acc:HGNC:11609]	TBXAS1	0.013742	2.13013	0.00888232	0.924914	0.998208	Unchanged
ENSG00000059378	protein_coding	poly(ADP-ribose) polymerase family member 12 [Source:HGNC Symbol;Acc:HGNC:21919]	PARP12	-0.127469	0.0200333	0.296539	0.58606	0.980546	Unchanged
ENSG00000059573	protein_coding	aldehyde dehydrogenase 18 family member A1 [Source:HGNC Symbol;Acc:HGNC:9722]	ALDH18A1	-0.0577601	6.63842	1.96554	0.160922	0.871237	Unchanged
ENSG00000059588	protein_coding	TAR (HIV-1) RNA binding protein 1 [Source:HGNC Symbol;Acc:HGNC:11568]	TARBP1	0.0269952	6.92629	0.289356	0.590633	0.980546	Unchanged
ENSG00000059691	protein_coding	glutamyl-tRNA amidotransferase subunit B [Source:HGNC Symbol;Acc:HGNC:8849]	GATB	0.0423914	5.03397	0.567701	0.451174	0.968568	Unchanged
ENSG00000059728	protein_coding	MAX dimerization protein 1 [Source:HGNC Symbol;Acc:HGNC:6761]	MXD1	0.0659045	3.92228	0.694835	0.404525	0.954361	Unchanged
ENSG00000059758	protein_coding	cyclin dependent kinase 17 [Source:HGNC Symbol;Acc:HGNC:8750]	CDK17	0.109404	4.79263	3.54024	0.0598969	0.758663	Unchanged
ENSG00000059769	protein_coding	DnaJ heat shock protein family (Hsp40) member C25 [Source:HGNC Symbol;Acc:HGNC:34187]	DNAJC25	-0.0220628	3.43856	0.0516008	0.820301	0.996176	Unchanged
ENSG00000059915	protein_coding	pleckstrin and Sec7 domain containing [Source:HGNC Symbol;Acc:HGNC:9507]	PSD	-0.0985673	5.04627	2.04785	0.152422	0.867274	Unchanged
ENSG00000060069	protein_coding	CTD phosphatase subunit 1 [Source:HGNC Symbol;Acc:HGNC:2498]	CTDP1	-0.00966495	4.83585	0.0264055	0.870914	0.998208	Unchanged
ENSG00000060237	protein_coding	WNK lysine deficient protein kinase 1 [Source:HGNC Symbol;Acc:HGNC:14540]	WNK1	-0.0529814	8.51435	2.60222	0.106714	0.832438	Unchanged
ENSG00000060339	protein_coding	cell division cycle and apoptosis regulator 1 [Source:HGNC Symbol;Acc:HGNC:24236]	CCAR1	-0.00645145	7.32455	0.0217538	0.882744	0.998208	Unchanged
ENSG00000060491	protein_coding	opioid growth factor receptor [Source:HGNC Symbol;Acc:HGNC:15768]	OGFR	-0.0543045	5.31842	1.05868	0.303517	0.925788	Unchanged
ENSG00000060566	protein_coding	cAMP responsive element binding protein 3 like 3 [Source:HGNC Symbol;Acc:HGNC:18855]	CREB3L3	-0.246551	-1.68099	0.228279	0.632803	0.980546	Unchanged
ENSG00000060642	protein_coding	phosphatidylinositol glycan anchor biosynthesis class V [Source:HGNC Symbol;Acc:HGNC:26031]	PIGV	-0.0339159	3.75701	0.183458	0.668418	0.984459	Unchanged
ENSG00000060656	protein_coding	protein tyrosine phosphatase receptor type U [Source:HGNC Symbol;Acc:HGNC:9683]	PTPRU	-0.0151392	5.39029	0.0785304	0.779299	0.993101	Unchanged
ENSG00000060688	protein_coding	small nuclear ribonucleoprotein U5 subunit 40 [Source:HGNC Symbol;Acc:HGNC:30857]	SNRNP40	0.0927573	5.96349	3.64765	0.0561484	0.750881	Unchanged
ENSG00000060709	protein_coding	RIMS binding protein 2 [Source:HGNC Symbol;Acc:HGNC:30339]	RIMBP2	-0.037352	7.94627	0.969647	0.324768	0.933855	Unchanged
ENSG00000060718	protein_coding	collagen type XI alpha 1 chain [Source:HGNC Symbol;Acc:HGNC:2186]	COL11A1	0.141666	2.09393	1.30969	0.252451	0.91002	Unchanged
ENSG00000060749	protein_coding	glutamine and serine rich 1 [Source:HGNC Symbol;Acc:HGNC:26154]	QSER1	-0.110818	8.0367	8.88529	0.00287477	0.321586	Unchanged
ENSG00000060762	protein_coding	mitochondrial pyruvate carrier 1 [Source:HGNC Symbol;Acc:HGNC:21606]	MPC1	0.0534662	4.24642	0.50213	0.478566	0.969599	Unchanged
ENSG00000060971	protein_coding	acetyl-CoA acyltransferase 1 [Source:HGNC Symbol;Acc:HGNC:82]	ACAA1	0.151007	4.12323	4.35941	0.036805	0.671731	Unchanged
ENSG00000060982	protein_coding	branched chain amino acid transaminase 1 [Source:HGNC Symbol;Acc:HGNC:976]	BCAT1	-0.0158549	8.41158	0.160088	0.689076	0.986442	Unchanged
ENSG00000061273	protein_coding	histone deacetylase 7 [Source:HGNC Symbol;Acc:HGNC:14067]	HDAC7	0.0749035	5.64654	1.83852	0.175125	0.87779	Unchanged
ENSG00000061337	protein_coding	leucine zipper tumor suppressor 1 [Source:HGNC Symbol;Acc:HGNC:13861]	LZTS1	0.12718	4.27626	2.87467	0.0899835	0.811108	Unchanged
ENSG00000061455	protein_coding	PR/SET domain 6 [Source:HGNC Symbol;Acc:HGNC:9350]	PRDM6	0.0838464	-0.319096	0.0734355	0.786399	0.993101	Unchanged
ENSG00000061656	protein_coding	sperm associated antigen 4 [Source:HGNC Symbol;Acc:HGNC:11214]	SPAG4	-0.00895157	2.00313	0.00350448	0.952794	0.998292	Unchanged
ENSG00000061676	protein_coding	NCK associated protein 1 [Source:HGNC Symbol;Acc:HGNC:7666]	NCKAP1	0.00309139	7.77012	0.00764854	0.930309	0.998208	Unchanged
ENSG00000061794	protein_coding	mitochondrial ribosomal protein S35 [Source:HGNC Symbol;Acc:HGNC:16635]	MRPS35	-0.040605	5.37916	0.647074	0.421161	0.95762	Unchanged
ENSG00000061918	protein_coding	guanylate cyclase 1 soluble subunit beta 1 [Source:HGNC Symbol;Acc:HGNC:4687]	GUCY1B1	-0.0404002	4.53978	0.309639	0.577902	0.980546	Unchanged
ENSG00000061936	protein_coding	splicing factor SWAP [Source:HGNC Symbol;Acc:HGNC:10790]	SFSWAP	0.0297174	6.73269	0.462115	0.496637	0.972467	Unchanged
ENSG00000061938	protein_coding	tyrosine kinase non receptor 2 [Source:HGNC Symbol;Acc:HGNC:19297]	TNK2	-0.0573034	5.55377	1.05898	0.303448	0.925788	Unchanged
ENSG00000061987	protein_coding	MON2 homolog, regulator of endosome-to-Golgi trafficking [Source:HGNC Symbol;Acc:HGNC:29177]	MON2	-0.126844	6.18743	8.98102	0.00272799	0.31266	Unchanged
ENSG00000062038	protein_coding	cadherin 3 [Source:HGNC Symbol;Acc:HGNC:1762]	CDH3	-0.00770545	0.30609	0.00065244	0.979622	0.999244	Unchanged
ENSG00000062194	protein_coding	GC-rich promoter binding protein 1 [Source:HGNC Symbol;Acc:HGNC:29520]	GPBP1	-0.0435713	7.09735	1.30623	0.253078	0.91002	Unchanged
ENSG00000062282	protein_coding	diacylglycerol O-acyltransferase 2 [Source:HGNC Symbol;Acc:HGNC:16940]	DGAT2	0.0838897	1.75359	0.27433	0.600442	0.980546	Unchanged
ENSG00000062370	protein_coding	zinc finger protein 112 [Source:HGNC Symbol;Acc:HGNC:12892]	ZNF112	-0.091973	4.3407	1.68942	0.193677	0.887171	Unchanged
ENSG00000062485	protein_coding	citrate synthase [Source:HGNC Symbol;Acc:HGNC:2422]	CS	-0.0141621	7.55157	0.169325	0.680712	0.98482	Unchanged
ENSG00000062524	protein_coding	leukocyte receptor tyrosine kinase [Source:HGNC Symbol;Acc:HGNC:6721]	LTK	0.622797	-1.08317	2.0733	0.149897	0.865953	Unchanged
ENSG00000062582	protein_coding	mitochondrial ribosomal protein S24 [Source:HGNC Symbol;Acc:HGNC:14510]	MRPS24	0.233778	-0.217503	0.452834	0.500992	0.972467	Unchanged
ENSG00000062598	protein_coding	engulfment and cell motility 2 [Source:HGNC Symbol;Acc:HGNC:17233]	ELMO2	-0.0809186	5.68124	3.04389	0.0810416	0.793377	Unchanged
ENSG00000062650	protein_coding	WAPL cohesin release factor [Source:HGNC Symbol;Acc:HGNC:23293]	WAPL	-0.0193318	6.95581	0.31006	0.577643	0.980546	Unchanged
ENSG00000062716	protein_coding	vacuole membrane protein 1 [Source:HGNC Symbol;Acc:HGNC:29559]	VMP1	0.0582843	6.19468	1.7882	0.181146	0.879851	Unchanged
ENSG00000062725	protein_coding	amyloid beta precursor protein binding protein 2 [Source:HGNC Symbol;Acc:HGNC:622]	APPBP2	-0.0939362	7.04129	6.32841	0.0118819	0.515202	Unchanged
ENSG00000062822	protein_coding	DNA polymerase delta 1, catalytic subunit [Source:HGNC Symbol;Acc:HGNC:9175]	POLD1	0.0159575	6.40433	0.0967257	0.755795	0.992257	Unchanged
ENSG00000063015	protein_coding	seizure related 6 homolog [Source:HGNC Symbol;Acc:HGNC:15955]	SEZ6	0.00954656	5.00786	0.0226144	0.880464	0.998208	Unchanged
ENSG00000063046	protein_coding	eukaryotic translation initiation factor 4B [Source:HGNC Symbol;Acc:HGNC:3285]	EIF4B	0.02165	8.75888	0.370588	0.542684	0.976665	Unchanged
ENSG00000063169	protein_coding	BRD4 interacting chromatin remodeling complex associated protein [Source:HGNC Symbol;Acc:HGNC:4332]	BICRA	-0.0794326	5.07323	1.51068	0.219035	0.901346	Unchanged
ENSG00000063176	protein_coding	sphingosine kinase 2 [Source:HGNC Symbol;Acc:HGNC:18859]	SPHK2	0.0554925	4.28767	0.56757	0.451226	0.968568	Unchanged
ENSG00000063177	protein_coding	ribosomal protein L18 [Source:HGNC Symbol;Acc:HGNC:10310]	RPL18	0.0162383	8.68811	0.156068	0.692803	0.986442	Unchanged
ENSG00000063180	protein_coding	carbonic anhydrase 11 [Source:HGNC Symbol;Acc:HGNC:1370]	CA11	0.0527273	3.38421	0.34541	0.556723	0.979393	Unchanged
ENSG00000063241	protein_coding	isochorismatase domain containing 2 [Source:HGNC Symbol;Acc:HGNC:26278]	ISOC2	0.0206584	4.17434	0.0716622	0.788932	0.993347	Unchanged
ENSG00000063244	protein_coding	U2 small nuclear RNA auxiliary factor 2 [Source:HGNC Symbol;Acc:HGNC:23156]	U2AF2	-0.00529017	7.93634	0.020589	0.885904	0.998208	Unchanged
ENSG00000063245	protein_coding	epsin 1 [Source:HGNC Symbol;Acc:HGNC:21604]	EPN1	-0.0115244	7.46654	0.078225	0.779717	0.993101	Unchanged
ENSG00000063322	protein_coding	mediator complex subunit 29 [Source:HGNC Symbol;Acc:HGNC:23074]	MED29	-0.0608539	5.72526	1.3224	0.250162	0.908929	Unchanged
ENSG00000063438	protein_coding	aryl-hydrocarbon receptor repressor [Source:HGNC Symbol;Acc:HGNC:346]	AHRR	0.219464	-1.82288	0.144814	0.703541	0.987361	Unchanged
ENSG00000063587	protein_coding	zinc finger protein 275 [Source:HGNC Symbol;Acc:HGNC:13069]	ZNF275	0.101914	5.06741	3.75809	0.0525524	0.732354	Unchanged
ENSG00000063601	protein_coding	myotubularin related protein 1 [Source:HGNC Symbol;Acc:HGNC:7449]	MTMR1	-0.0606011	5.59893	1.60564	0.205105	0.894806	Unchanged
ENSG00000063660	protein_coding	glypican 1 [Source:HGNC Symbol;Acc:HGNC:4449]	GPC1	0.0218354	5.26803	0.14906	0.699435	0.987004	Unchanged
ENSG00000063761	protein_coding	aarF domain containing kinase 1 [Source:HGNC Symbol;Acc:HGNC:19038]	ADCK1	0.130597	2.53532	1.16244	0.280961	0.918563	Unchanged
ENSG00000063854	protein_coding	hydroxyacylglutathione hydrolase [Source:HGNC Symbol;Acc:HGNC:4805]	HAGH	-0.00399932	4.74755	0.00429441	0.947751	0.998208	Unchanged
ENSG00000063978	protein_coding	ring finger protein 4 [Source:HGNC Symbol;Acc:HGNC:10067]	RNF4	0.0752423	5.72036	2.10034	0.147267	0.864353	Unchanged
ENSG00000064012	protein_coding	caspase 8 [Source:HGNC Symbol;Acc:HGNC:1509]	CASP8	0.260665	-1.51576	0.271674	0.602211	0.980546	Unchanged
ENSG00000064042	protein_coding	LIM and calponin homology domains 1 [Source:HGNC Symbol;Acc:HGNC:29191]	LIMCH1	0.0343651	8.51059	0.929731	0.334933	0.936388	Unchanged
ENSG00000064102	protein_coding	integrator complex subunit 13 [Source:HGNC Symbol;Acc:HGNC:20174]	INTS13	-0.0839661	5.09196	2.60703	0.106391	0.832438	Unchanged
ENSG00000064115	protein_coding	transmembrane 7 superfamily member 3 [Source:HGNC Symbol;Acc:HGNC:23049]	TM7SF3	-0.0381411	6.20149	0.861603	0.353291	0.944176	Unchanged
ENSG00000064199	protein_coding	sperm autoantigenic protein 17 [Source:HGNC Symbol;Acc:HGNC:11210]	SPA17	-0.0109731	4.51859	0.0286962	0.865482	0.998208	Unchanged
ENSG00000064201	protein_coding	tetraspanin 32 [Source:HGNC Symbol;Acc:HGNC:13410]	TSPAN32	0.0490856	-1.61538	0.0108431	0.917066	0.998208	Unchanged
ENSG00000064225	protein_coding	ST3 beta-galactoside alpha-2,3-sialyltransferase 6 [Source:HGNC Symbol;Acc:HGNC:18080]	ST3GAL6	-0.0316752	5.89292	0.363972	0.546309	0.978455	Unchanged
ENSG00000064270	protein_coding	ATPase secretory pathway Ca2+ transporting 2 [Source:HGNC Symbol;Acc:HGNC:29103]	ATP2C2	-0.0894997	-1.68112	0.0297132	0.863143	0.998208	Unchanged
ENSG00000064300	protein_coding	nerve growth factor receptor [Source:HGNC Symbol;Acc:HGNC:7809]	NGFR	0.0869447	3.92526	0.785421	0.375488	0.948036	Unchanged
ENSG00000064309	protein_coding	cell adhesion associated, oncogene regulated [Source:HGNC Symbol;Acc:HGNC:17104]	CDON	0.0513488	5.71867	1.08267	0.298101	0.925619	Unchanged
ENSG00000064313	protein_coding	TATA-box binding protein associated factor 2 [Source:HGNC Symbol;Acc:HGNC:11536]	TAF2	0.0219771	6.24198	0.273239	0.601167	0.980546	Unchanged
ENSG00000064393	protein_coding	homeodomain interacting protein kinase 2 [Source:HGNC Symbol;Acc:HGNC:14402]	HIPK2	-0.0560254	8.48054	2.13204	0.144249	0.864353	Unchanged
ENSG00000064419	protein_coding	transportin 3 [Source:HGNC Symbol;Acc:HGNC:17103]	TNPO3	-0.0351861	7.41894	1.00355	0.316454	0.931414	Unchanged
ENSG00000064490	protein_coding	regulatory factor X associated ankyrin containing protein [Source:HGNC Symbol;Acc:HGNC:9987]	RFXANK	0.0191947	4.06097	0.069957	0.791399	0.994195	Unchanged
ENSG00000064545	protein_coding	transmembrane protein 161A [Source:HGNC Symbol;Acc:HGNC:26020]	TMEM161A	-0.0195691	3.58669	0.0543184	0.815712	0.996176	Unchanged
ENSG00000064547	protein_coding	lysophosphatidic acid receptor 2 [Source:HGNC Symbol;Acc:HGNC:3168]	LPAR2	0.0725115	4.3414	1.00847	0.31527	0.930972	Unchanged
ENSG00000064601	protein_coding	cathepsin A [Source:HGNC Symbol;Acc:HGNC:9251]	CTSA	0.0647556	4.91508	0.766237	0.381384	0.94836	Unchanged
ENSG00000064607	protein_coding	SURP and G-patch domain containing 2 [Source:HGNC Symbol;Acc:HGNC:18641]	SUGP2	-0.0180614	7.71556	0.233771	0.628742	0.980546	Unchanged
ENSG00000064651	protein_coding	solute carrier family 12 member 2 [Source:HGNC Symbol;Acc:HGNC:10911]	SLC12A2	-0.0283046	5.46114	0.281294	0.595854	0.980546	Unchanged
ENSG00000064652	protein_coding	sorting nexin 24 [Source:HGNC Symbol;Acc:HGNC:21533]	SNX24	0.0507851	4.14311	0.532826	0.465421	0.969572	Unchanged
ENSG00000064655	protein_coding	EYA transcriptional coactivator and phosphatase 2 [Source:HGNC Symbol;Acc:HGNC:3520]	EYA2	0.271174	-0.875404	0.329689	0.565842	0.980269	Unchanged
ENSG00000064666	protein_coding	calponin 2 [Source:HGNC Symbol;Acc:HGNC:2156]	CNN2	0.108192	3.17428	0.595085	0.44046	0.965512	Unchanged
ENSG00000064687	protein_coding	ATP binding cassette subfamily A member 7 [Source:HGNC Symbol;Acc:HGNC:37]	ABCA7	-0.0664961	2.86443	0.279951	0.596733	0.980546	Unchanged
ENSG00000064692	protein_coding	synuclein alpha interacting protein [Source:HGNC Symbol;Acc:HGNC:11139]	SNCAIP	-0.0522095	1.46755	0.113907	0.735739	0.990209	Unchanged
ENSG00000064703	protein_coding	DEAD-box helicase 20 [Source:HGNC Symbol;Acc:HGNC:2743]	DDX20	-0.0566371	5.64777	1.38702	0.238908	0.906228	Unchanged
ENSG00000064726	protein_coding	BTB domain containing 1 [Source:HGNC Symbol;Acc:HGNC:1120]	BTBD1	-0.00282972	6.39306	0.00512722	0.942917	0.998208	Unchanged
ENSG00000064763	protein_coding	fatty acyl-CoA reductase 2 [Source:HGNC Symbol;Acc:HGNC:25531]	FAR2	0.134249	2.69576	1.34069	0.246912	0.907195	Unchanged
ENSG00000064932	protein_coding	strawberry notch homolog 2 [Source:HGNC Symbol;Acc:HGNC:29158]	SBNO2	0.0067374	5.21231	0.014444	0.904338	0.998208	Unchanged
ENSG00000064933	protein_coding	PMS1 homolog 1, mismatch repair system component [Source:HGNC Symbol;Acc:HGNC:9121]	PMS1	-0.0769603	5.75282	1.89101	0.169088	0.874432	Unchanged
ENSG00000064961	protein_coding	high mobility group 20B [Source:HGNC Symbol;Acc:HGNC:5002]	HMG20B	0.0377756	5.98196	0.781591	0.376655	0.948036	Unchanged
ENSG00000064995	protein_coding	TATA-box binding protein associated factor 11 [Source:HGNC Symbol;Acc:HGNC:11544]	TAF11	-0.0322571	5.64355	0.401194	0.526473	0.97327	Unchanged
ENSG00000064999	protein_coding	ankyrin repeat and sterile alpha motif domain containing 1A [Source:HGNC Symbol;Acc:HGNC:20961]	ANKS1A	-0.0451993	6.05114	0.999616	0.317403	0.931446	Unchanged
ENSG00000065000	protein_coding	adaptor related protein complex 3 subunit delta 1 [Source:HGNC Symbol;Acc:HGNC:568]	AP3D1	0.0207527	7.60604	0.344851	0.557042	0.979393	Unchanged
ENSG00000065029	protein_coding	zinc finger protein 76 [Source:HGNC Symbol;Acc:HGNC:13149]	ZNF76	0.0438028	4.62071	0.519283	0.471148	0.969572	Unchanged
ENSG00000065054	protein_coding	SLC9A3 regulator 2 [Source:HGNC Symbol;Acc:HGNC:11076]	SLC9A3R2	-0.113983	3.81889	1.56406	0.211072	0.897784	Unchanged
ENSG00000065057	protein_coding	nth like DNA glycosylase 1 [Source:HGNC Symbol;Acc:HGNC:8028]	NTHL1	0.0473866	4.60854	0.406577	0.523712	0.97327	Unchanged
ENSG00000065060	protein_coding	UHRF1 binding protein 1 [Source:HGNC Symbol;Acc:HGNC:21216]	UHRF1BP1	-0.00235196	6.23441	0.00312249	0.955438	0.998687	Unchanged
ENSG00000065135	protein_coding	G protein subunit alpha i3 [Source:HGNC Symbol;Acc:HGNC:4387]	GNAI3	-0.0185908	7.49229	0.215683	0.642349	0.982227	Unchanged
ENSG00000065150	protein_coding	importin 5 [Source:HGNC Symbol;Acc:HGNC:6402]	IPO5	-0.0011158	8.85679	0.00114603	0.972994	0.998791	Unchanged
ENSG00000065154	protein_coding	ornithine aminotransferase [Source:HGNC Symbol;Acc:HGNC:8091]	OAT	-0.0241451	6.47722	0.315313	0.574438	0.980546	Unchanged
ENSG00000065183	protein_coding	WD repeat domain 3 [Source:HGNC Symbol;Acc:HGNC:12755]	WDR3	0.0154539	7.16569	0.156765	0.692153	0.986442	Unchanged
ENSG00000065243	protein_coding	protein kinase N2 [Source:HGNC Symbol;Acc:HGNC:9406]	PKN2	-0.0220522	6.13337	0.18116	0.670378	0.98482	Unchanged
ENSG00000065268	protein_coding	WD repeat domain 18 [Source:HGNC Symbol;Acc:HGNC:17956]	WDR18	0.0146455	5.36301	0.0682495	0.793903	0.994515	Unchanged
ENSG00000065308	protein_coding	translocation associated membrane protein 2 [Source:HGNC Symbol;Acc:HGNC:16855]	TRAM2	-0.10933	5.2755	3.10648	0.0779813	0.787018	Unchanged
ENSG00000065328	protein_coding	minichromosome maintenance 10 replication initiation factor [Source:HGNC Symbol;Acc:HGNC:18043]	MCM10	0.011922	7.14936	0.076098	0.782657	0.993101	Unchanged
ENSG00000065357	protein_coding	diacylglycerol kinase alpha [Source:HGNC Symbol;Acc:HGNC:2849]	DGKA	-0.172855	2.60982	2.1427	0.143249	0.864353	Unchanged
ENSG00000065361	protein_coding	erb-b2 receptor tyrosine kinase 3 [Source:HGNC Symbol;Acc:HGNC:3431]	ERBB3	0.335059	-0.406318	1.18042	0.27727	0.916892	Unchanged
ENSG00000065413	protein_coding	ankyrin repeat domain 44 [Source:HGNC Symbol;Acc:HGNC:25259]	ANKRD44	-0.0124046	7.39523	0.123835	0.724912	0.990209	Unchanged
ENSG00000065427	protein_coding	lysyl-tRNA synthetase 1 [Source:HGNC Symbol;Acc:HGNC:6215]	KARS1	-0.00148636	7.74154	0.00167848	0.96732	0.998791	Unchanged
ENSG00000065457	protein_coding	adenosine deaminase tRNA specific 1 [Source:HGNC Symbol;Acc:HGNC:228]	ADAT1	-0.0425154	6.61701	1.04702	0.306194	0.926666	Unchanged
ENSG00000065485	protein_coding	protein disulfide isomerase family A member 5 [Source:HGNC Symbol;Acc:HGNC:24811]	PDIA5	0.0417605	3.1726	0.164922	0.684665	0.986034	Unchanged
ENSG00000065491	protein_coding	TBC1 domain family member 22B [Source:HGNC Symbol;Acc:HGNC:21602]	TBC1D22B	0.0925979	4.35164	2.09966	0.147332	0.864353	Unchanged
ENSG00000065518	protein_coding	NADH:ubiquinone oxidoreductase subunit B4 [Source:HGNC Symbol;Acc:HGNC:7699]	NDUFB4	-0.00431975	5.82262	0.00819248	0.92788	0.998208	Unchanged
ENSG00000065526	protein_coding	spen family transcriptional repressor [Source:HGNC Symbol;Acc:HGNC:17575]	SPEN	-0.0601208	8.24428	3.44996	0.0632532	0.771521	Unchanged
ENSG00000065534	protein_coding	myosin light chain kinase [Source:HGNC Symbol;Acc:HGNC:7590]	MYLK	-0.00612809	3.42652	0.00387176	0.950385	0.998208	Unchanged
ENSG00000065548	protein_coding	zinc finger CCCH-type containing 15 [Source:HGNC Symbol;Acc:HGNC:29528]	ZC3H15	0.0108258	6.45724	0.0579813	0.809716	0.996154	Unchanged
ENSG00000065559	protein_coding	mitogen-activated protein kinase kinase 4 [Source:HGNC Symbol;Acc:HGNC:6844]	MAP2K4	-0.0408756	5.58766	0.673093	0.411975	0.955789	Unchanged
ENSG00000065600	protein_coding	proton activated chloride channel 1 [Source:HGNC Symbol;Acc:HGNC:25593]	PACC1	0.00474279	5.4318	0.00911203	0.923952	0.998208	Unchanged
ENSG00000065609	protein_coding	synaptosome associated protein 91 [Source:HGNC Symbol;Acc:HGNC:14986]	SNAP91	-0.0571395	6.81735	2.16037	0.141611	0.864353	Unchanged
ENSG00000065613	protein_coding	STE20 like kinase [Source:HGNC Symbol;Acc:HGNC:11088]	SLK	-0.0258201	6.23008	0.262635	0.608315	0.980546	Unchanged
ENSG00000065615	protein_coding	cytochrome b5 reductase 4 [Source:HGNC Symbol;Acc:HGNC:20147]	CYB5R4	-0.014588	6.29565	0.0996946	0.752196	0.992067	Unchanged
ENSG00000065621	protein_coding	glutathione S-transferase omega 2 [Source:HGNC Symbol;Acc:HGNC:23064]	GSTO2	0.0613762	-0.137489	0.0394437	0.842572	0.996518	Unchanged
ENSG00000065665	protein_coding	SEC61 translocon subunit alpha 2 [Source:HGNC Symbol;Acc:HGNC:17702]	SEC61A2	-0.0792102	5.15427	2.08404	0.148846	0.865705	Unchanged
ENSG00000065675	protein_coding	protein kinase C theta [Source:HGNC Symbol;Acc:HGNC:9410]	PRKCQ	-0.00774875	2.11433	0.00310302	0.955577	0.998687	Unchanged
ENSG00000065717	protein_coding	TLE family member 2, transcriptional corepressor [Source:HGNC Symbol;Acc:HGNC:11838]	TLE2	0.281065	1.73423	2.79022	0.094841	0.817939	Unchanged
ENSG00000065802	protein_coding	ankyrin repeat and SOCS box containing 1 [Source:HGNC Symbol;Acc:HGNC:16011]	ASB1	-0.02929	6.42966	0.46396	0.495779	0.972467	Unchanged
ENSG00000065809	protein_coding	family with sequence similarity 107 member B [Source:HGNC Symbol;Acc:HGNC:23726]	FAM107B	0.00584072	7.44214	0.0276658	0.867897	0.998208	Unchanged
ENSG00000065833	protein_coding	malic enzyme 1 [Source:HGNC Symbol;Acc:HGNC:6983]	ME1	0.0854154	5.07797	2.45327	0.11728	0.843154	Unchanged
ENSG00000065882	protein_coding	TBC1 domain family member 1 [Source:HGNC Symbol;Acc:HGNC:11578]	TBC1D1	-0.0238182	5.96539	0.280028	0.596683	0.980546	Unchanged
ENSG00000065883	protein_coding	cyclin dependent kinase 13 [Source:HGNC Symbol;Acc:HGNC:1733]	CDK13	-0.0404786	7.16752	1.1828	0.276787	0.916516	Unchanged
ENSG00000065911	protein_coding	methylenetetrahydrofolate dehydrogenase (NADP+ dependent) 2, methenyltetrahydrofolate cyclohydrolase [Source:HGNC Symbol;Acc:HGNC:7434]	MTHFD2	-0.00477939	7.47754	0.0151049	0.902185	0.998208	Unchanged
ENSG00000065923	protein_coding	solute carrier family 9 member A7 [Source:HGNC Symbol;Acc:HGNC:17123]	SLC9A7	0.0907488	3.50772	1.27225	0.259344	0.912292	Unchanged
ENSG00000065970	protein_coding	forkhead box J2 [Source:HGNC Symbol;Acc:HGNC:24818]	FOXJ2	-0.0501159	4.63565	0.647869	0.420875	0.957454	Unchanged
ENSG00000065978	protein_coding	Y-box binding protein 1 [Source:HGNC Symbol;Acc:HGNC:8014]	YBX1	0.0373787	10.0284	1.13163	0.287428	0.921584	Unchanged
ENSG00000065989	protein_coding	phosphodiesterase 4A [Source:HGNC Symbol;Acc:HGNC:8780]	PDE4A	-0.114133	1.17957	0.379017	0.53813	0.976464	Unchanged
ENSG00000066027	protein_coding	protein phosphatase 2 regulatory subunit B'alpha [Source:HGNC Symbol;Acc:HGNC:9309]	PPP2R5A	-0.239455	3.8286	10.2541	0.00136382	0.221438	Unchanged
ENSG00000066032	protein_coding	catenin alpha 2 [Source:HGNC Symbol;Acc:HGNC:2510]	CTNNA2	0.0279805	5.94976	0.444174	0.505115	0.973159	Unchanged
ENSG00000066044	protein_coding	ELAV like RNA binding protein 1 [Source:HGNC Symbol;Acc:HGNC:3312]	ELAVL1	-0.0317646	7.66705	0.57669	0.447613	0.967042	Unchanged
ENSG00000066084	protein_coding	disco interacting protein 2 homolog B [Source:HGNC Symbol;Acc:HGNC:29284]	DIP2B	-0.00560049	6.84005	0.021093	0.884526	0.998208	Unchanged
ENSG00000066117	protein_coding	SWI/SNF related, matrix associated, actin dependent regulator of chromatin, subfamily d, member 1 [Source:HGNC Symbol;Acc:HGNC:11106]	SMARCD1	0.0615277	7.50725	3.09893	0.0783438	0.787018	Unchanged
ENSG00000066135	protein_coding	lysine demethylase 4A [Source:HGNC Symbol;Acc:HGNC:22978]	KDM4A	-0.0380564	5.46659	0.557873	0.455119	0.969572	Unchanged
ENSG00000066136	protein_coding	nuclear transcription factor Y subunit gamma [Source:HGNC Symbol;Acc:HGNC:7806]	NFYC	0.0903425	5.39492	2.82249	0.0929522	0.815068	Unchanged
ENSG00000066185	protein_coding	zinc finger MYND-type containing 12 [Source:HGNC Symbol;Acc:HGNC:21192]	ZMYND12	0.131549	-0.946733	0.108522	0.741833	0.990714	Unchanged
ENSG00000066230	protein_coding	solute carrier family 9 member A3 [Source:HGNC Symbol;Acc:HGNC:11073]	SLC9A3	-0.439072	-0.641098	1.12075	0.289758	0.922397	Unchanged
ENSG00000066248	protein_coding	neuronal guanine nucleotide exchange factor [Source:HGNC Symbol;Acc:HGNC:7807]	NGEF	0.576278	-1.1561	1.71557	0.190264	0.884529	Unchanged
ENSG00000066279	protein_coding	assembly factor for spindle microtubules [Source:HGNC Symbol;Acc:HGNC:19048]	ASPM	-0.0177969	9.09632	0.0818215	0.774844	0.993101	Unchanged
ENSG00000066322	protein_coding	ELOVL fatty acid elongase 1 [Source:HGNC Symbol;Acc:HGNC:14418]	ELOVL1	-0.0667165	3.94409	0.568713	0.450771	0.968568	Unchanged
ENSG00000066379	protein_coding	RNA polymerase I subunit H [Source:HGNC Symbol;Acc:HGNC:13182]	POLR1H	-0.0581121	3.18922	0.310376	0.57745	0.980546	Unchanged
ENSG00000066382	protein_coding	metallophosphoesterase domain containing 2 [Source:HGNC Symbol;Acc:HGNC:1180]	MPPED2	-0.00710043	3.58453	0.00738923	0.931498	0.998208	Unchanged
ENSG00000066422	protein_coding	zinc finger and BTB domain containing 11 [Source:HGNC Symbol;Acc:HGNC:16740]	ZBTB11	-0.0682703	5.94461	1.63037	0.201652	0.891614	Unchanged
ENSG00000066427	protein_coding	ataxin 3 [Source:HGNC Symbol;Acc:HGNC:7106]	ATXN3	-0.041788	5.38198	0.779591	0.377266	0.948099	Unchanged
ENSG00000066455	protein_coding	golgin A5 [Source:HGNC Symbol;Acc:HGNC:4428]	GOLGA5	-0.0270665	5.35552	0.243769	0.621497	0.980546	Unchanged
ENSG00000066468	protein_coding	fibroblast growth factor receptor 2 [Source:HGNC Symbol;Acc:HGNC:3689]	FGFR2	0.0190263	1.83086	0.0192435	0.889671	0.998208	Unchanged
ENSG00000066557	protein_coding	leucine rich repeat containing 40 [Source:HGNC Symbol;Acc:HGNC:26004]	LRRC40	-0.00529552	5.39159	0.00933998	0.923009	0.998208	Unchanged
ENSG00000066583	protein_coding	isochorismatase domain containing 1 [Source:HGNC Symbol;Acc:HGNC:24254]	ISOC1	0.00235305	6.43265	0.00253939	0.95981	0.998791	Unchanged
ENSG00000066629	protein_coding	EMAP like 1 [Source:HGNC Symbol;Acc:HGNC:3330]	EML1	-0.0036155	6.2063	0.00691989	0.933704	0.998208	Unchanged
ENSG00000066651	protein_coding	tRNA methyltransferase 11 homolog [Source:HGNC Symbol;Acc:HGNC:21080]	TRMT11	0.13786	4.43377	4.73976	0.0294733	0.643726	Unchanged
ENSG00000066654	protein_coding	THUMP domain containing 1 [Source:HGNC Symbol;Acc:HGNC:23807]	THUMPD1	0.0516456	6.42374	1.68072	0.194828	0.887961	Unchanged
ENSG00000066697	protein_coding	Myb/SANT DNA binding domain containing 3 [Source:HGNC Symbol;Acc:HGNC:23370]	MSANTD3	0.0488601	5.46419	1.07236	0.300413	0.925776	Unchanged
ENSG00000066735	protein_coding	kinesin family member 26A [Source:HGNC Symbol;Acc:HGNC:20226]	KIF26A	-0.0562858	7.60706	0.892503	0.3448	0.941865	Unchanged
ENSG00000066739	protein_coding	autophagy related 2B [Source:HGNC Symbol;Acc:HGNC:20187]	ATG2B	-0.103182	6.74626	6.93692	0.00844345	0.463684	Unchanged
ENSG00000066777	protein_coding	ADP ribosylation factor guanine nucleotide exchange factor 1 [Source:HGNC Symbol;Acc:HGNC:15772]	ARFGEF1	-0.00520259	6.43032	0.0130341	0.909105	0.998208	Unchanged
ENSG00000066827	protein_coding	zinc finger and AT-hook domain containing [Source:HGNC Symbol;Acc:HGNC:19899]	ZFAT	-0.0256084	3.47396	0.0644294	0.799627	0.994737	Unchanged
ENSG00000066855	protein_coding	mitochondrial fission regulator 1 [Source:HGNC Symbol;Acc:HGNC:29510]	MTFR1	-0.0690018	4.33783	1.01781	0.313039	0.93049	Unchanged
ENSG00000066923	protein_coding	stromal antigen 3 [Source:HGNC Symbol;Acc:HGNC:11356]	STAG3	0.265283	0.180733	1.1608	0.281299	0.918563	Unchanged
ENSG00000066926	protein_coding	ferrochelatase [Source:HGNC Symbol;Acc:HGNC:3647]	FECH	0.0534956	5.16401	0.904158	0.341669	0.94013	Unchanged
ENSG00000066933	protein_coding	myosin IXA [Source:HGNC Symbol;Acc:HGNC:7608]	MYO9A	-0.085031	6.2706	2.97159	0.0847386	0.799511	Unchanged
ENSG00000067057	protein_coding	phosphofructokinase, platelet [Source:HGNC Symbol;Acc:HGNC:8878]	PFKP	0.00770923	6.82571	0.039428	0.842603	0.996518	Unchanged
ENSG00000067064	protein_coding	isopentenyl-diphosphate delta isomerase 1 [Source:HGNC Symbol;Acc:HGNC:5387]	IDI1	0.0502413	6.27491	1.29888	0.254418	0.910058	Unchanged
ENSG00000067066	protein_coding	SP100 nuclear antigen [Source:HGNC Symbol;Acc:HGNC:11206]	SP100	0.0398012	1.62079	0.0453624	0.831339	0.996176	Unchanged
ENSG00000067082	protein_coding	Kruppel like factor 6 [Source:HGNC Symbol;Acc:HGNC:2235]	KLF6	0.171224	4.95885	9.58252	0.00196439	0.262253	Unchanged
ENSG00000067113	protein_coding	phospholipid phosphatase 1 [Source:HGNC Symbol;Acc:HGNC:9228]	PLPP1	-0.0526482	2.36753	0.178244	0.672887	0.98482	Unchanged
ENSG00000067141	protein_coding	neogenin 1 [Source:HGNC Symbol;Acc:HGNC:7754]	NEO1	-0.0224628	7.29644	0.359947	0.548535	0.978558	Unchanged
ENSG00000067167	protein_coding	translocation associated membrane protein 1 [Source:HGNC Symbol;Acc:HGNC:20568]	TRAM1	0.0194209	6.06414	0.174003	0.676579	0.98482	Unchanged
ENSG00000067177	protein_coding	phosphorylase kinase regulatory subunit alpha 1 [Source:HGNC Symbol;Acc:HGNC:8925]	PHKA1	0.0473153	5.16035	0.640654	0.423474	0.958761	Unchanged
ENSG00000067182	protein_coding	TNF receptor superfamily member 1A [Source:HGNC Symbol;Acc:HGNC:11916]	TNFRSF1A	-0.0351001	2.29312	0.0744793	0.784923	0.993101	Unchanged
ENSG00000067191	protein_coding	calcium voltage-gated channel auxiliary subunit beta 1 [Source:HGNC Symbol;Acc:HGNC:1401]	CACNB1	0.0314075	4.62422	0.224895	0.635335	0.980893	Unchanged
ENSG00000067208	protein_coding	ecotropic viral integration site 5 [Source:HGNC Symbol;Acc:HGNC:3501]	EVI5	-0.0578876	4.66013	0.794072	0.372872	0.946714	Unchanged
ENSG00000067221	protein_coding	stomatin like 1 [Source:HGNC Symbol;Acc:HGNC:14560]	STOML1	0.168729	2.9769	2.73987	0.0978727	0.823737	Unchanged
ENSG00000067225	protein_coding	pyruvate kinase M1/2 [Source:HGNC Symbol;Acc:HGNC:9021]	PKM	0.000654512	9.65543	0.000356362	0.984939	0.999523	Unchanged
ENSG00000067248	protein_coding	DExH-box helicase 29 [Source:HGNC Symbol;Acc:HGNC:15815]	DHX29	0.000803952	5.57893	0.000211443	0.988398	0.999523	Unchanged
ENSG00000067334	protein_coding	deoxynucleotidyltransferase terminal interacting protein 2 [Source:HGNC Symbol;Acc:HGNC:24013]	DNTTIP2	0.0288035	6.40641	0.283344	0.594518	0.980546	Unchanged
ENSG00000067365	protein_coding	methyltransferase like 22 [Source:HGNC Symbol;Acc:HGNC:28368]	METTL22	0.211685	3.97172	8.07984	0.00447604	0.380131	Unchanged
ENSG00000067369	protein_coding	tumor protein p53 binding protein 1 [Source:HGNC Symbol;Acc:HGNC:11999]	TP53BP1	-0.0672105	8.07096	4.47325	0.0344294	0.660958	Unchanged
ENSG00000067445	protein_coding	trophinin [Source:HGNC Symbol;Acc:HGNC:12326]	TRO	-0.0335031	6.64416	0.619773	0.431132	0.961199	Unchanged
ENSG00000067533	protein_coding	ribosomal RNA processing 15 homolog [Source:HGNC Symbol;Acc:HGNC:24255]	RRP15	0.00169809	6.49453	0.00157002	0.968393	0.998791	Unchanged
ENSG00000067560	protein_coding	ras homolog family member A [Source:HGNC Symbol;Acc:HGNC:667]	RHOA	0.00173308	8.42013	0.00263218	0.959083	0.998791	Unchanged
ENSG00000067596	protein_coding	DEAH-box helicase 8 [Source:HGNC Symbol;Acc:HGNC:2749]	DHX8	0.00378084	6.91863	0.0110236	0.916381	0.998208	Unchanged
ENSG00000067601	transcribed_unprocessed_pseudogene	PMS1 homolog 2, mismatch repair system component pseudogene 4 [Source:HGNC Symbol;Acc:HGNC:9129]	PMS2P4	0.0786676	1.84258	0.327013	0.567423	0.98052	Unchanged
ENSG00000067606	protein_coding	protein kinase C zeta [Source:HGNC Symbol;Acc:HGNC:9412]	PRKCZ	0.042273	4.90164	0.353664	0.552046	0.978876	Unchanged
ENSG00000067704	protein_coding	isoleucyl-tRNA synthetase 2, mitochondrial [Source:HGNC Symbol;Acc:HGNC:29685]	IARS2	-0.0182287	7.65872	0.229216	0.632106	0.980546	Unchanged
ENSG00000067715	protein_coding	synaptotagmin 1 [Source:HGNC Symbol;Acc:HGNC:11509]	SYT1	0.101403	6.36359	5.90117	0.0151308	0.546955	Unchanged
ENSG00000067798	protein_coding	neuron navigator 3 [Source:HGNC Symbol;Acc:HGNC:15998]	NAV3	-0.478744	-1.3039	1.41334	0.234502	0.90543	Unchanged
ENSG00000067829	protein_coding	isocitrate dehydrogenase (NAD(+)) 3 non-catalytic subunit gamma [Source:HGNC Symbol;Acc:HGNC:5386]	IDH3G	0.0444631	4.51292	0.44742	0.503563	0.972583	Unchanged
ENSG00000067836	protein_coding	rogdi atypical leucine zipper [Source:HGNC Symbol;Acc:HGNC:29478]	ROGDI	0.012954	2.7475	0.0125241	0.910894	0.998208	Unchanged
ENSG00000067840	protein_coding	PDZ domain containing 4 [Source:HGNC Symbol;Acc:HGNC:21167]	PDZD4	0.00516288	7.07025	0.0155213	0.900852	0.998208	Unchanged
ENSG00000067842	protein_coding	ATPase plasma membrane Ca2+ transporting 3 [Source:HGNC Symbol;Acc:HGNC:816]	ATP2B3	-0.0497574	4.94408	0.70528	0.401015	0.953782	Unchanged
ENSG00000067900	protein_coding	Rho associated coiled-coil containing protein kinase 1 [Source:HGNC Symbol;Acc:HGNC:10251]	ROCK1	-0.0369688	6.43242	0.575948	0.447905	0.967103	Unchanged
ENSG00000067955	protein_coding	core-binding factor subunit beta [Source:HGNC Symbol;Acc:HGNC:1539]	CBFB	-0.025999	6.86393	0.436168	0.508978	0.973159	Unchanged
ENSG00000067992	protein_coding	pyruvate dehydrogenase kinase 3 [Source:HGNC Symbol;Acc:HGNC:8811]	PDK3	-0.0356362	5.33624	0.452663	0.501073	0.972467	Unchanged
ENSG00000068001	protein_coding	hyaluronidase 2 [Source:HGNC Symbol;Acc:HGNC:5321]	HYAL2	0.000199349	4.65468	9.39956e-06	0.997554	0.999523	Unchanged
ENSG00000068024	protein_coding	histone deacetylase 4 [Source:HGNC Symbol;Acc:HGNC:14063]	HDAC4	-0.0957128	5.55475	3.28579	0.0698821	0.782824	Unchanged
ENSG00000068028	protein_coding	Ras association domain family member 1 [Source:HGNC Symbol;Acc:HGNC:9882]	RASSF1	0.0866788	4.10025	1.28092	0.257728	0.912292	Unchanged
ENSG00000068078	protein_coding	fibroblast growth factor receptor 3 [Source:HGNC Symbol;Acc:HGNC:3690]	FGFR3	0.425851	1.56612	4.92547	0.0264636	0.627921	Unchanged
ENSG00000068097	protein_coding	HEAT repeat containing 6 [Source:HGNC Symbol;Acc:HGNC:24076]	HEATR6	0.0318013	6.35722	0.627299	0.428348	0.960241	Unchanged
ENSG00000068120	protein_coding	Coenzyme A synthase [Source:HGNC Symbol;Acc:HGNC:29932]	COASY	0.0159702	5.68199	0.0977602	0.754534	0.992257	Unchanged
ENSG00000068137	protein_coding	pleckstrin homology, MyTH4 and FERM domain containing H3 [Source:HGNC Symbol;Acc:HGNC:26105]	PLEKHH3	0.0199284	4.31065	0.057747	0.810093	0.996154	Unchanged
ENSG00000068305	protein_coding	myocyte enhancer factor 2A [Source:HGNC Symbol;Acc:HGNC:6993]	MEF2A	0.0234589	6.0875	0.330481	0.565376	0.980269	Unchanged
ENSG00000068308	protein_coding	OTU deubiquitinase 5 [Source:HGNC Symbol;Acc:HGNC:25402]	OTUD5	0.00782601	5.84918	0.0288348	0.865161	0.998208	Unchanged
ENSG00000068323	protein_coding	transcription factor binding to IGHM enhancer 3 [Source:HGNC Symbol;Acc:HGNC:11752]	TFE3	-0.0397235	4.7732	0.372689	0.541542	0.976665	Unchanged
ENSG00000068354	protein_coding	TBC1 domain family member 25 [Source:HGNC Symbol;Acc:HGNC:8092]	TBC1D25	-0.00235784	3.41065	0.000589268	0.980633	0.999244	Unchanged
ENSG00000068366	protein_coding	acyl-CoA synthetase long chain family member 4 [Source:HGNC Symbol;Acc:HGNC:3571]	ACSL4	-0.109576	5.87888	5.04763	0.0246596	0.618602	Unchanged
ENSG00000068383	protein_coding	inositol polyphosphate-5-phosphatase A [Source:HGNC Symbol;Acc:HGNC:6076]	INPP5A	0.0531834	4.43053	0.566415	0.451687	0.96881	Unchanged
ENSG00000068394	protein_coding	G-patch domain and KOW motifs [Source:HGNC Symbol;Acc:HGNC:30677]	GPKOW	0.0325475	4.37884	0.244541	0.620945	0.980546	Unchanged
ENSG00000068400	protein_coding	GRIP1 associated protein 1 [Source:HGNC Symbol;Acc:HGNC:18706]	GRIPAP1	0.0569744	6.25273	1.36171	0.243241	0.90687	Unchanged
ENSG00000068438	protein_coding	FtsJ RNA 2'-O-methyltransferase 1 [Source:HGNC Symbol;Acc:HGNC:13254]	FTSJ1	0.0140642	5.29493	0.0653077	0.798295	0.994613	Unchanged
ENSG00000068489	protein_coding	proline rich 11 [Source:HGNC Symbol;Acc:HGNC:25619]	PRR11	-0.0293378	7.85555	0.700097	0.402751	0.954361	Unchanged
ENSG00000068615	protein_coding	receptor accessory protein 1 [Source:HGNC Symbol;Acc:HGNC:25786]	REEP1	0.0670904	4.1726	0.715497	0.397625	0.953136	Unchanged
ENSG00000068650	protein_coding	ATPase phospholipid transporting 11A [Source:HGNC Symbol;Acc:HGNC:13552]	ATP11A	-0.020246	6.17536	0.198186	0.656189	0.983553	Unchanged
ENSG00000068654	protein_coding	RNA polymerase I subunit A [Source:HGNC Symbol;Acc:HGNC:17264]	POLR1A	-0.0171927	7.43838	0.19409	0.659534	0.983802	Unchanged
ENSG00000068697	protein_coding	lysosomal protein transmembrane 4 alpha [Source:HGNC Symbol;Acc:HGNC:6924]	LAPTM4A	0.0291488	6.66691	0.524447	0.468951	0.969572	Unchanged
ENSG00000068724	protein_coding	tetratricopeptide repeat domain 7A [Source:HGNC Symbol;Acc:HGNC:19750]	TTC7A	-0.0187384	4.37065	0.0774126	0.780835	0.993101	Unchanged
ENSG00000068745	protein_coding	inositol hexakisphosphate kinase 2 [Source:HGNC Symbol;Acc:HGNC:17313]	IP6K2	-0.00353233	6.27227	0.00686231	0.93398	0.998208	Unchanged
ENSG00000068784	protein_coding	S1 RNA binding domain 1 [Source:HGNC Symbol;Acc:HGNC:25521]	SRBD1	0.0201608	5.85358	0.201759	0.653305	0.982638	Unchanged
ENSG00000068796	protein_coding	kinesin family member 2A [Source:HGNC Symbol;Acc:HGNC:6318]	KIF2A	-0.0612295	8.19602	2.6321	0.104723	0.829975	Unchanged
ENSG00000068831	protein_coding	RAS guanyl releasing protein 2 [Source:HGNC Symbol;Acc:HGNC:9879]	RASGRP2	0.043652	2.52738	0.132414	0.715942	0.989751	Unchanged
ENSG00000068878	protein_coding	proteasome activator subunit 4 [Source:HGNC Symbol;Acc:HGNC:20635]	PSME4	0.0278319	7.50136	0.667169	0.41404	0.95664	Unchanged
ENSG00000068885	protein_coding	intraflagellar transport 80 [Source:HGNC Symbol;Acc:HGNC:29262]	IFT80	-0.126326	4.9183	4.19888	0.0404507	0.682373	Unchanged
ENSG00000068903	protein_coding	sirtuin 2 [Source:HGNC Symbol;Acc:HGNC:10886]	SIRT2	-0.0305485	3.85187	0.154358	0.694405	0.986549	Unchanged
ENSG00000068912	protein_coding	endoplasmic reticulum lectin 1 [Source:HGNC Symbol;Acc:HGNC:25222]	ERLEC1	-0.00506545	5.54114	0.0113471	0.915168	0.998208	Unchanged
ENSG00000068971	protein_coding	protein phosphatase 2 regulatory subunit B'beta [Source:HGNC Symbol;Acc:HGNC:9310]	PPP2R5B	-0.00552207	4.05578	0.00538264	0.941514	0.998208	Unchanged
ENSG00000068976	protein_coding	glycogen phosphorylase, muscle associated [Source:HGNC Symbol;Acc:HGNC:9726]	PYGM	-0.309636	-1.33508	0.520819	0.470493	0.969572	Unchanged
ENSG00000069020	protein_coding	microtubule associated serine/threonine kinase family member 4 [Source:HGNC Symbol;Acc:HGNC:19037]	MAST4	-0.0195259	4.1597	0.0702738	0.790939	0.994132	Unchanged
ENSG00000069188	protein_coding	sidekick cell adhesion molecule 2 [Source:HGNC Symbol;Acc:HGNC:19308]	SDK2	-0.0916376	1.77263	0.196887	0.657245	0.983802	Unchanged
ENSG00000069248	protein_coding	nucleoporin 133 [Source:HGNC Symbol;Acc:HGNC:18016]	NUP133	-0.00106084	7.35531	0.000798356	0.977459	0.998874	Unchanged
ENSG00000069275	protein_coding	nuclear casein kinase and cyclin dependent kinase substrate 1 [Source:HGNC Symbol;Acc:HGNC:29923]	NUCKS1	0.0290114	10.5165	0.921785	0.337007	0.937936	Unchanged
ENSG00000069329	protein_coding	VPS35 retromer complex component [Source:HGNC Symbol;Acc:HGNC:13487]	VPS35	-0.0518202	7.32688	1.91695	0.166193	0.873341	Unchanged
ENSG00000069345	protein_coding	DnaJ heat shock protein family (Hsp40) member A2 [Source:HGNC Symbol;Acc:HGNC:14884]	DNAJA2	-0.0767804	6.3662	2.47321	0.115801	0.841006	Unchanged
ENSG00000069424	protein_coding	potassium voltage-gated channel subfamily A regulatory beta subunit 2 [Source:HGNC Symbol;Acc:HGNC:6229]	KCNAB2	0.118017	3.84118	2.41174	0.120429	0.846679	Unchanged
ENSG00000069482	protein_coding	galanin and GMAP prepropeptide [Source:HGNC Symbol;Acc:HGNC:4114]	GAL	0.0166209	6.02319	0.09279	0.76066	0.992571	Unchanged
ENSG00000069493	protein_coding	C-type lectin domain family 2 member D [Source:HGNC Symbol;Acc:HGNC:14351]	CLEC2D	0.0370481	3.42732	0.125156	0.723509	0.990209	Unchanged
ENSG00000069509	protein_coding	FUN14 domain containing 1 [Source:HGNC Symbol;Acc:HGNC:28746]	FUNDC1	0.00335468	4.05496	0.00148239	0.969288	0.998791	Unchanged
ENSG00000069535	protein_coding	monoamine oxidase B [Source:HGNC Symbol;Acc:HGNC:6834]	MAOB	0.0412457	3.49299	0.22	0.63904	0.981605	Unchanged
ENSG00000069667	protein_coding	RAR related orphan receptor A [Source:HGNC Symbol;Acc:HGNC:10258]	RORA	0.0221985	3.81873	0.0997883	0.752084	0.992067	Unchanged
ENSG00000069696	protein_coding	dopamine receptor D4 [Source:HGNC Symbol;Acc:HGNC:3025]	DRD4	-0.228943	-0.096615	0.64479	0.421982	0.958129	Unchanged
ENSG00000069849	protein_coding	ATPase Na+/K+ transporting subunit beta 3 [Source:HGNC Symbol;Acc:HGNC:806]	ATP1B3	-0.0501533	6.22458	1.20138	0.273046	0.914023	Unchanged
ENSG00000069869	protein_coding	NEDD4 E3 ubiquitin protein ligase [Source:HGNC Symbol;Acc:HGNC:7727]	NEDD4	-0.0494233	4.60829	0.535418	0.464338	0.969572	Unchanged
ENSG00000069943	protein_coding	phosphatidylinositol glycan anchor biosynthesis class B [Source:HGNC Symbol;Acc:HGNC:8959]	PIGB	0.181804	2.93465	2.7715	0.0959559	0.819284	Unchanged
ENSG00000069956	protein_coding	mitogen-activated protein kinase 6 [Source:HGNC Symbol;Acc:HGNC:6879]	MAPK6	0.0573541	6.84442	2.01211	0.156049	0.86871	Unchanged
ENSG00000069966	protein_coding	G protein subunit beta 5 [Source:HGNC Symbol;Acc:HGNC:4401]	GNB5	0.0540279	4.74224	0.786251	0.375236	0.948036	Unchanged
ENSG00000069974	protein_coding	RAB27A, member RAS oncogene family [Source:HGNC Symbol;Acc:HGNC:9766]	RAB27A	0.0583824	2.77113	0.27785	0.598114	0.980546	Unchanged
ENSG00000069998	protein_coding	haloacid dehalogenase like hydrolase domain containing 5 [Source:HGNC Symbol;Acc:HGNC:1843]	HDHD5	0.0219631	5.71094	0.195588	0.658306	0.983802	Unchanged
ENSG00000070010	protein_coding	ubiquitin recognition factor in ER associated degradation 1 [Source:HGNC Symbol;Acc:HGNC:12520]	UFD1	0.0104763	6.16556	0.0533441	0.817343	0.996176	Unchanged
ENSG00000070018	protein_coding	LDL receptor related protein 6 [Source:HGNC Symbol;Acc:HGNC:6698]	LRP6	0.089964	7.04438	5.27652	0.0216149	0.599921	Unchanged
ENSG00000070047	protein_coding	PHD and ring finger domains 1 [Source:HGNC Symbol;Acc:HGNC:24351]	PHRF1	0.0310822	6.99619	0.547948	0.459157	0.969572	Unchanged
ENSG00000070061	protein_coding	elongator acetyltransferase complex subunit 1 [Source:HGNC Symbol;Acc:HGNC:5959]	ELP1	-0.0161919	7.00653	0.192444	0.66089	0.983802	Unchanged
ENSG00000070081	protein_coding	nucleobindin 2 [Source:HGNC Symbol;Acc:HGNC:8044]	NUCB2	-0.0316887	5.14265	0.221324	0.638033	0.981605	Unchanged
ENSG00000070087	protein_coding	profilin 2 [Source:HGNC Symbol;Acc:HGNC:8882]	PFN2	0.00330125	8.24992	0.00908686	0.924057	0.998208	Unchanged
ENSG00000070159	protein_coding	protein tyrosine phosphatase non-receptor type 3 [Source:HGNC Symbol;Acc:HGNC:9655]	PTPN3	-0.0657177	0.182197	0.0442534	0.833383	0.996176	Unchanged
ENSG00000070182	protein_coding	spectrin beta, erythrocytic [Source:HGNC Symbol;Acc:HGNC:11274]	SPTB	0.00546263	3.97928	0.00471226	0.945271	0.998208	Unchanged
ENSG00000070214	protein_coding	solute carrier family 44 member 1 [Source:HGNC Symbol;Acc:HGNC:18798]	SLC44A1	-0.0611257	6.61992	2.1335	0.144111	0.864353	Unchanged
ENSG00000070269	protein_coding	transmembrane protein 260 [Source:HGNC Symbol;Acc:HGNC:20185]	TMEM260	-0.0719046	4.67256	1.22552	0.26828	0.914023	Unchanged
ENSG00000070366	protein_coding	SMG6 nonsense mediated mRNA decay factor [Source:HGNC Symbol;Acc:HGNC:17809]	SMG6	0.0124832	6.08782	0.0750289	0.784151	0.993101	Unchanged
ENSG00000070367	protein_coding	exocyst complex component 5 [Source:HGNC Symbol;Acc:HGNC:10696]	EXOC5	-0.0726471	7.28373	3.30083	0.0692448	0.782824	Unchanged
ENSG00000070371	protein_coding	clathrin heavy chain like 1 [Source:HGNC Symbol;Acc:HGNC:2093]	CLTCL1	-0.0936109	3.94509	1.54727	0.213539	0.900706	Unchanged
ENSG00000070388	protein_coding	fibroblast growth factor 22 [Source:HGNC Symbol;Acc:HGNC:3679]	FGF22	-0.0675756	-0.595565	0.025306	0.873607	0.998208	Unchanged
ENSG00000070404	protein_coding	follistatin like 3 [Source:HGNC Symbol;Acc:HGNC:3973]	FSTL3	-0.178454	2.35851	1.8485	0.173957	0.87779	Unchanged
ENSG00000070413	protein_coding	DiGeorge syndrome critical region gene 2 [Source:HGNC Symbol;Acc:HGNC:2845]	DGCR2	0.00907983	6.25252	0.0284814	0.865982	0.998208	Unchanged
ENSG00000070423	protein_coding	ring finger protein 126 [Source:HGNC Symbol;Acc:HGNC:21151]	RNF126	0.0641364	5.02688	1.013	0.314184	0.93049	Unchanged
ENSG00000070444	protein_coding	MAX network transcriptional repressor [Source:HGNC Symbol;Acc:HGNC:7188]	MNT	0.0867967	5.40462	2.9328	0.086797	0.804162	Unchanged
ENSG00000070476	protein_coding	ZXD family zinc finger C [Source:HGNC Symbol;Acc:HGNC:28160]	ZXDC	-0.0965332	5.11466	2.66087	0.102845	0.828616	Unchanged
ENSG00000070495	protein_coding	jumonji domain containing 6, arginine demethylase and lysine hydroxylase [Source:HGNC Symbol;Acc:HGNC:19355]	JMJD6	-0.0918745	5.43955	2.7631	0.096461	0.820002	Unchanged
ENSG00000070501	protein_coding	DNA polymerase beta [Source:HGNC Symbol;Acc:HGNC:9174]	POLB	-0.0068461	4.84507	0.010755	0.917402	0.998208	Unchanged
ENSG00000070540	protein_coding	WD repeat domain, phosphoinositide interacting 1 [Source:HGNC Symbol;Acc:HGNC:25471]	WIPI1	0.0141993	2.03111	0.00957324	0.922057	0.998208	Unchanged
ENSG00000070601	protein_coding	FERM and PDZ domain containing 1 [Source:HGNC Symbol;Acc:HGNC:29159]	FRMPD1	0.0354708	-1.05648	0.00719018	0.932424	0.998208	Unchanged
ENSG00000070610	protein_coding	glucosylceramidase beta 2 [Source:HGNC Symbol;Acc:HGNC:18986]	GBA2	0.0824453	6.35906	3.49205	0.0616641	0.765761	Unchanged
ENSG00000070614	protein_coding	N-deacetylase and N-sulfotransferase 1 [Source:HGNC Symbol;Acc:HGNC:7680]	NDST1	-0.00214619	7.60832	0.00277953	0.957954	0.998791	Unchanged
ENSG00000070669	protein_coding	asparagine synthetase (glutamine-hydrolyzing) [Source:HGNC Symbol;Acc:HGNC:753]	ASNS	-0.0685428	3.12923	0.402101	0.526006	0.97327	Unchanged
ENSG00000070718	protein_coding	adaptor related protein complex 3 subunit mu 2 [Source:HGNC Symbol;Acc:HGNC:570]	AP3M2	0.0957137	5.72701	2.84354	0.0917421	0.813921	Unchanged
ENSG00000070729	protein_coding	cyclic nucleotide gated channel subunit beta 1 [Source:HGNC Symbol;Acc:HGNC:2151]	CNGB1	-0.0498729	0.497663	0.0253679	0.873454	0.998208	Unchanged
ENSG00000070748	protein_coding	choline O-acetyltransferase [Source:HGNC Symbol;Acc:HGNC:1912]	CHAT	0.096855	-0.979753	0.047756	0.827015	0.996176	Unchanged
ENSG00000070756	protein_coding	poly(A) binding protein cytoplasmic 1 [Source:HGNC Symbol;Acc:HGNC:8554]	PABPC1	0.0226468	10.3414	0.527561	0.467634	0.969572	Unchanged
ENSG00000070759	protein_coding	testis associated actin remodelling kinase 2 [Source:HGNC Symbol;Acc:HGNC:11732]	TESK2	-0.156639	1.50175	0.680869	0.409288	0.954361	Unchanged
ENSG00000070761	protein_coding	cilia and flagella associated protein 20 [Source:HGNC Symbol;Acc:HGNC:29523]	CFAP20	-0.0916091	5.51686	3.14712	0.0760609	0.787018	Unchanged
ENSG00000070770	protein_coding	casein kinase 2 alpha 2 [Source:HGNC Symbol;Acc:HGNC:2459]	CSNK2A2	-0.0613452	6.92805	2.50864	0.113224	0.837211	Unchanged
ENSG00000070778	protein_coding	protein tyrosine phosphatase non-receptor type 21 [Source:HGNC Symbol;Acc:HGNC:9651]	PTPN21	-0.0183524	6.31296	0.21904	0.639773	0.981605	Unchanged
ENSG00000070785	protein_coding	eukaryotic translation initiation factor 2B subunit gamma [Source:HGNC Symbol;Acc:HGNC:3259]	EIF2B3	-0.0163022	4.26174	0.0459854	0.830202	0.996176	Unchanged
ENSG00000070814	protein_coding	treacle ribosome biogenesis factor 1 [Source:HGNC Symbol;Acc:HGNC:11654]	TCOF1	-0.0448749	7.78419	1.5295	0.216187	0.901002	Unchanged
ENSG00000070831	protein_coding	cell division cycle 42 [Source:HGNC Symbol;Acc:HGNC:1736]	CDC42	0.0395938	7.26813	1.22034	0.269294	0.914023	Unchanged
ENSG00000070882	protein_coding	oxysterol binding protein like 3 [Source:HGNC Symbol;Acc:HGNC:16370]	OSBPL3	0.0474015	3.73889	0.333466	0.563625	0.980269	Unchanged
ENSG00000070886	protein_coding	EPH receptor A8 [Source:HGNC Symbol;Acc:HGNC:3391]	EPHA8	-0.112963	2.78433	0.871311	0.350593	0.94355	Unchanged
ENSG00000070915	protein_coding	solute carrier family 12 member 3 [Source:HGNC Symbol;Acc:HGNC:10912]	SLC12A3	0.47802	-0.736255	1.55987	0.211684	0.897784	Unchanged
ENSG00000070950	protein_coding	RAD18 E3 ubiquitin protein ligase [Source:HGNC Symbol;Acc:HGNC:18278]	RAD18	-0.0409869	6.18457	0.839537	0.359529	0.944807	Unchanged
ENSG00000070961	protein_coding	ATPase plasma membrane Ca2+ transporting 1 [Source:HGNC Symbol;Acc:HGNC:814]	ATP2B1	-0.0513262	6.63927	1.10187	0.293856	0.923435	Unchanged
ENSG00000070985	protein_coding	transient receptor potential cation channel subfamily M member 5 [Source:HGNC Symbol;Acc:HGNC:14323]	TRPM5	-0.188658	-1.35686	0.157927	0.691072	0.986442	Unchanged
ENSG00000071051	protein_coding	NCK adaptor protein 2 [Source:HGNC Symbol;Acc:HGNC:7665]	NCK2	0.0279817	5.74773	0.317031	0.573397	0.980546	Unchanged
ENSG00000071054	protein_coding	mitogen-activated protein kinase kinase kinase kinase 4 [Source:HGNC Symbol;Acc:HGNC:6866]	MAP4K4	-0.00421964	8.60983	0.0183767	0.892169	0.998208	Unchanged
ENSG00000071073	protein_coding	alpha-1,3-mannosyl-glycoprotein 4-beta-N-acetylglucosaminyltransferase A [Source:HGNC Symbol;Acc:HGNC:7047]	MGAT4A	-0.135384	4.87606	5.20368	0.0225391	0.605726	Unchanged
ENSG00000071082	protein_coding	ribosomal protein L31 [Source:HGNC Symbol;Acc:HGNC:10334]	RPL31	-0.00384482	8.75631	0.00728833	0.931966	0.998208	Unchanged
ENSG00000071127	protein_coding	WD repeat domain 1 [Source:HGNC Symbol;Acc:HGNC:12754]	WDR1	-0.0215832	6.84886	0.19775	0.656543	0.983553	Unchanged
ENSG00000071189	protein_coding	sorting nexin 13 [Source:HGNC Symbol;Acc:HGNC:21335]	SNX13	-0.0594426	5.89923	1.37587	0.240806	0.906328	Unchanged
ENSG00000071205	protein_coding	Rho GTPase activating protein 10 [Source:HGNC Symbol;Acc:HGNC:26099]	ARHGAP10	0.126274	2.22889	0.827032	0.363132	0.945863	Unchanged
ENSG00000071242	protein_coding	ribosomal protein S6 kinase A2 [Source:HGNC Symbol;Acc:HGNC:10431]	RPS6KA2	0.0204289	6.26065	0.223801	0.636159	0.98122	Unchanged
ENSG00000071243	protein_coding	inhibitor of growth family member 3 [Source:HGNC Symbol;Acc:HGNC:14587]	ING3	-0.0142738	4.85537	0.0580092	0.809671	0.996154	Unchanged
ENSG00000071246	protein_coding	vasohibin 1 [Source:HGNC Symbol;Acc:HGNC:19964]	VASH1	0.0275578	5.55833	0.309065	0.578255	0.980546	Unchanged
ENSG00000071282	protein_coding	LIM and cysteine rich domains 1 [Source:HGNC Symbol;Acc:HGNC:6633]	LMCD1	-0.037786	4.4915	0.268114	0.6046	0.980546	Unchanged
ENSG00000071462	protein_coding	BUD23 rRNA methyltransferase and ribosome maturation factor [Source:HGNC Symbol;Acc:HGNC:16405]	BUD23	0.0335641	6.27862	0.673672	0.411774	0.955789	Unchanged
ENSG00000071537	protein_coding	SEL1L adaptor subunit of ERAD E3 ubiquitin ligase [Source:HGNC Symbol;Acc:HGNC:10717]	SEL1L	-0.0337657	6.71708	0.654294	0.418582	0.956674	Unchanged
ENSG00000071539	protein_coding	thyroid hormone receptor interactor 13 [Source:HGNC Symbol;Acc:HGNC:12307]	TRIP13	0.0354281	6.48173	0.858543	0.354147	0.944619	Unchanged
ENSG00000071553	protein_coding	ATPase H+ transporting accessory protein 1 [Source:HGNC Symbol;Acc:HGNC:868]	ATP6AP1	-0.000809648	5.78814	0.000270175	0.986886	0.999523	Unchanged
ENSG00000071564	protein_coding	transcription factor 3 [Source:HGNC Symbol;Acc:HGNC:11633]	TCF3	0.0115983	7.99585	0.0901528	0.763983	0.992613	Unchanged
ENSG00000071575	protein_coding	tribbles pseudokinase 2 [Source:HGNC Symbol;Acc:HGNC:30809]	TRIB2	-0.0334074	6.37959	0.722993	0.395164	0.953136	Unchanged
ENSG00000071626	protein_coding	DAZ associated protein 1 [Source:HGNC Symbol;Acc:HGNC:2683]	DAZAP1	-0.00540116	7.61639	0.0246568	0.875225	0.998208	Unchanged
ENSG00000071655	protein_coding	methyl-CpG binding domain protein 3 [Source:HGNC Symbol;Acc:HGNC:6918]	MBD3	0.0673001	6.52507	1.44374	0.229534	0.903139	Unchanged
ENSG00000071794	protein_coding	helicase like transcription factor [Source:HGNC Symbol;Acc:HGNC:11099]	HLTF	-0.00680548	7.05946	0.0272837	0.868804	0.998208	Unchanged
ENSG00000071859	protein_coding	family with sequence similarity 50 member A [Source:HGNC Symbol;Acc:HGNC:18786]	FAM50A	0.00145669	5.01246	0.000660762	0.979492	0.999244	Unchanged
ENSG00000071889	protein_coding	FAM3 metabolism regulating signaling molecule A [Source:HGNC Symbol;Acc:HGNC:13749]	FAM3A	-0.00876895	3.58061	0.00973806	0.921391	0.998208	Unchanged
ENSG00000071894	protein_coding	cleavage and polyadenylation specific factor 1 [Source:HGNC Symbol;Acc:HGNC:2324]	CPSF1	0.035268	6.77795	0.580867	0.445973	0.966828	Unchanged
ENSG00000071967	protein_coding	cytochrome b reductase 1 [Source:HGNC Symbol;Acc:HGNC:20797]	CYBRD1	-0.109775	1.41235	0.420916	0.51648	0.973159	Unchanged
ENSG00000071994	protein_coding	programmed cell death 2 [Source:HGNC Symbol;Acc:HGNC:8762]	PDCD2	0.0557004	6.75308	1.97605	0.159807	0.871237	Unchanged
ENSG00000072041	protein_coding	solute carrier family 6 member 15 [Source:HGNC Symbol;Acc:HGNC:13621]	SLC6A15	-0.0366055	6.55287	0.81621	0.366291	0.945863	Unchanged
ENSG00000072042	protein_coding	retinol dehydrogenase 11 [Source:HGNC Symbol;Acc:HGNC:17964]	RDH11	0.0019749	5.9382	0.00177312	0.966412	0.998791	Unchanged
ENSG00000072062	protein_coding	protein kinase cAMP-activated catalytic subunit alpha [Source:HGNC Symbol;Acc:HGNC:9380]	PRKACA	-0.0329414	6.39291	0.491673	0.483182	0.971147	Unchanged
ENSG00000072071	protein_coding	adhesion G protein-coupled receptor L1 [Source:HGNC Symbol;Acc:HGNC:20973]	ADGRL1	-0.00212472	7.47381	0.0024261	0.960716	0.998791	Unchanged
ENSG00000072110	protein_coding	actinin alpha 1 [Source:HGNC Symbol;Acc:HGNC:163]	ACTN1	-0.105027	6.96157	5.75858	0.0164083	0.550259	Unchanged
ENSG00000072121	protein_coding	zinc finger FYVE-type containing 26 [Source:HGNC Symbol;Acc:HGNC:20761]	ZFYVE26	0.0515608	5.37358	0.995579	0.318383	0.932223	Unchanged
ENSG00000072133	protein_coding	ribosomal protein S6 kinase A6 [Source:HGNC Symbol;Acc:HGNC:10435]	RPS6KA6	-0.122517	5.67922	6.27477	0.0122469	0.516411	Unchanged
ENSG00000072134	protein_coding	epsin 2 [Source:HGNC Symbol;Acc:HGNC:18639]	EPN2	-0.0428176	6.22798	1.003	0.316586	0.931414	Unchanged
ENSG00000072135	protein_coding	protein tyrosine phosphatase non-receptor type 18 [Source:HGNC Symbol;Acc:HGNC:9649]	PTPN18	0.0509368	4.40552	0.630735	0.427086	0.959785	Unchanged
ENSG00000072163	protein_coding	LIM zinc finger domain containing 2 [Source:HGNC Symbol;Acc:HGNC:16084]	LIMS2	-0.644184	-1.88333	1.21465	0.270414	0.914023	Unchanged
ENSG00000072182	protein_coding	acid sensing ion channel subunit family member 4 [Source:HGNC Symbol;Acc:HGNC:21263]	ASIC4	-0.0552905	2.52691	0.217721	0.640782	0.981784	Unchanged
ENSG00000072195	protein_coding	striated muscle enriched protein kinase [Source:HGNC Symbol;Acc:HGNC:16901]	SPEG	0.0302052	5.48033	0.287498	0.591829	0.980546	Unchanged
ENSG00000072201	protein_coding	ligand of numb-protein X 1 [Source:HGNC Symbol;Acc:HGNC:6657]	LNX1	0.0106562	-0.971024	0.000543722	0.981397	0.999244	Unchanged
ENSG00000072210	protein_coding	aldehyde dehydrogenase 3 family member A2 [Source:HGNC Symbol;Acc:HGNC:403]	ALDH3A2	-0.0829396	6.05989	3.27749	0.0702363	0.782824	Unchanged
ENSG00000072274	protein_coding	transferrin receptor [Source:HGNC Symbol;Acc:HGNC:11763]	TFRC	-0.0312415	8.14125	0.734551	0.391412	0.951869	Unchanged
ENSG00000072310	protein_coding	sterol regulatory element binding transcription factor 1 [Source:HGNC Symbol;Acc:HGNC:11289]	SREBF1	0.0128692	5.32609	0.0440395	0.83378	0.996176	Unchanged
ENSG00000072364	protein_coding	AF4/FMR2 family member 4 [Source:HGNC Symbol;Acc:HGNC:17869]	AFF4	-0.1087	8.01098	11.9166	0.00055637	0.147861	Unchanged
ENSG00000072401	protein_coding	ubiquitin conjugating enzyme E2 D1 [Source:HGNC Symbol;Acc:HGNC:12474]	UBE2D1	-0.0596945	5.05761	1.11282	0.29147	0.922744	Unchanged
ENSG00000072415	protein_coding	membrane palmitoylated protein 5 [Source:HGNC Symbol;Acc:HGNC:18669]	MPP5	0.120506	5.2427	4.93748	0.0262803	0.627202	Unchanged
ENSG00000072422	protein_coding	Rho related BTB domain containing 1 [Source:HGNC Symbol;Acc:HGNC:18738]	RHOBTB1	-0.0486424	5.46398	0.837637	0.360074	0.944807	Unchanged
ENSG00000072501	protein_coding	structural maintenance of chromosomes 1A [Source:HGNC Symbol;Acc:HGNC:11111]	SMC1A	-0.00690155	9.51103	0.047095	0.828198	0.996176	Unchanged
ENSG00000072506	protein_coding	hydroxysteroid 17-beta dehydrogenase 10 [Source:HGNC Symbol;Acc:HGNC:4800]	HSD17B10	0.0399045	5.96537	0.648993	0.420473	0.957405	Unchanged
ENSG00000072518	protein_coding	microtubule affinity regulating kinase 2 [Source:HGNC Symbol;Acc:HGNC:3332]	MARK2	-0.149707	5.78497	7.24844	0.00709624	0.450123	Unchanged
ENSG00000072571	protein_coding	hyaluronan mediated motility receptor [Source:HGNC Symbol;Acc:HGNC:5012]	HMMR	-0.0114267	6.76058	0.0596538	0.807044	0.996154	Unchanged
ENSG00000072609	protein_coding	checkpoint with forkhead and ring finger domains [Source:HGNC Symbol;Acc:HGNC:20455]	CHFR	0.00446764	5.7059	0.00900487	0.924399	0.998208	Unchanged
ENSG00000072682	protein_coding	prolyl 4-hydroxylase subunit alpha 2 [Source:HGNC Symbol;Acc:HGNC:8547]	P4HA2	-0.0383345	3.2142	0.157235	0.691715	0.986442	Unchanged
ENSG00000072736	protein_coding	nuclear factor of activated T cells 3 [Source:HGNC Symbol;Acc:HGNC:7777]	NFATC3	-0.0661051	6.44348	2.28053	0.131007	0.855003	Unchanged
ENSG00000072756	protein_coding	tRNA nucleotidyl transferase 1 [Source:HGNC Symbol;Acc:HGNC:17341]	TRNT1	0.0162759	5.46724	0.0816342	0.775095	0.993101	Unchanged
ENSG00000072778	protein_coding	acyl-CoA dehydrogenase very long chain [Source:HGNC Symbol;Acc:HGNC:92]	ACADVL	0.0761128	6.26504	2.76475	0.0963617	0.820002	Unchanged
ENSG00000072786	protein_coding	serine/threonine kinase 10 [Source:HGNC Symbol;Acc:HGNC:11388]	STK10	0.0532371	4.24386	0.528177	0.467374	0.969572	Unchanged
ENSG00000072803	protein_coding	F-box and WD repeat domain containing 11 [Source:HGNC Symbol;Acc:HGNC:13607]	FBXW11	-0.0123462	6.96078	0.118585	0.730575	0.990209	Unchanged
ENSG00000072832	protein_coding	collapsin response mediator protein 1 [Source:HGNC Symbol;Acc:HGNC:2365]	CRMP1	0.0251527	8.75854	0.50866	0.47572	0.969572	Unchanged
ENSG00000072840	protein_coding	EvC ciliary complex subunit 1 [Source:HGNC Symbol;Acc:HGNC:3497]	EVC	0.0626911	4.45776	0.70135	0.40233	0.954255	Unchanged
ENSG00000072849	protein_coding	derlin 2 [Source:HGNC Symbol;Acc:HGNC:17943]	DERL2	0.0576003	5.86875	1.47126	0.225147	0.901346	Unchanged
ENSG00000072858	protein_coding	SID1 transmembrane family member 1 [Source:HGNC Symbol;Acc:HGNC:25967]	SIDT1	-1.07654	-1.86795	3.29705	0.0694045	0.782824	Unchanged
ENSG00000072864	protein_coding	nudE neurodevelopment protein 1 [Source:HGNC Symbol;Acc:HGNC:17619]	NDE1	-0.0293537	5.63274	0.468984	0.493455	0.972467	Unchanged
ENSG00000072952	protein_coding	inositol 1,4,5-triphosphate receptor associated 1 [Source:HGNC Symbol;Acc:HGNC:7237]	IRAG1	-0.121706	3.42605	2.05945	0.151265	0.86658	Unchanged
ENSG00000072954	protein_coding	transmembrane protein 38A [Source:HGNC Symbol;Acc:HGNC:28462]	TMEM38A	-0.161192	2.47	1.38569	0.239134	0.906228	Unchanged
ENSG00000072958	protein_coding	adaptor related protein complex 1 subunit mu 1 [Source:HGNC Symbol;Acc:HGNC:13667]	AP1M1	0.0122273	6.45258	0.0705942	0.790474	0.993772	Unchanged
ENSG00000073008	protein_coding	PVR cell adhesion molecule [Source:HGNC Symbol;Acc:HGNC:9705]	PVR	-0.0196551	5.28852	0.135692	0.712602	0.98856	Unchanged
ENSG00000073050	protein_coding	X-ray repair cross complementing 1 [Source:HGNC Symbol;Acc:HGNC:12828]	XRCC1	0.00589353	4.936	0.0114191	0.9149	0.998208	Unchanged
ENSG00000073060	protein_coding	scavenger receptor class B member 1 [Source:HGNC Symbol;Acc:HGNC:1664]	SCARB1	0.00333363	5.57488	0.00420291	0.948309	0.998208	Unchanged
ENSG00000073111	protein_coding	minichromosome maintenance complex component 2 [Source:HGNC Symbol;Acc:HGNC:6944]	MCM2	0.0497376	8.01439	1.64699	0.199369	0.89065	Unchanged
ENSG00000073146	protein_coding	Mov10 like RISC complex RNA helicase 1 [Source:HGNC Symbol;Acc:HGNC:7201]	MOV10L1	-0.185765	-1.76448	0.141478	0.706816	0.987435	Unchanged
ENSG00000073150	protein_coding	pannexin 2 [Source:HGNC Symbol;Acc:HGNC:8600]	PANX2	0.0347014	2.18124	0.0654689	0.798052	0.994515	Unchanged
ENSG00000073169	protein_coding	selenoprotein O [Source:HGNC Symbol;Acc:HGNC:30395]	SELENOO	0.0785757	4.48786	1.32367	0.249935	0.908632	Unchanged
ENSG00000073331	protein_coding	alpha kinase 1 [Source:HGNC Symbol;Acc:HGNC:20917]	ALPK1	0.0945276	-0.728759	0.0638898	0.80045	0.994954	Unchanged
ENSG00000073350	protein_coding	LLGL scribble cell polarity complex component 2 [Source:HGNC Symbol;Acc:HGNC:6629]	LLGL2	0.0463147	2.18803	0.117381	0.731893	0.990209	Unchanged
ENSG00000073417	protein_coding	phosphodiesterase 8A [Source:HGNC Symbol;Acc:HGNC:8793]	PDE8A	0.0520687	5.31417	0.634127	0.425846	0.959323	Unchanged
ENSG00000073464	protein_coding	chloride voltage-gated channel 4 [Source:HGNC Symbol;Acc:HGNC:2022]	CLCN4	0.045402	5.16277	0.602448	0.437645	0.964645	Unchanged
ENSG00000073536	protein_coding	notchless homolog 1 [Source:HGNC Symbol;Acc:HGNC:19889]	NLE1	-0.0162603	4.91065	0.0697411	0.791714	0.994218	Unchanged
ENSG00000073578	protein_coding	succinate dehydrogenase complex flavoprotein subunit A [Source:HGNC Symbol;Acc:HGNC:10680]	SDHA	-0.0323724	3.14308	0.108407	0.741965	0.990714	Unchanged
ENSG00000073584	protein_coding	SWI/SNF related, matrix associated, actin dependent regulator of chromatin, subfamily e, member 1 [Source:HGNC Symbol;Acc:HGNC:11109]	SMARCE1	0.015249	4.70513	0.0718103	0.788719	0.993175	Unchanged
ENSG00000073605	protein_coding	gasdermin B [Source:HGNC Symbol;Acc:HGNC:23690]	GSDMB	-0.124291	3.64953	2.07605	0.149627	0.865773	Unchanged
ENSG00000073614	protein_coding	lysine demethylase 5A [Source:HGNC Symbol;Acc:HGNC:9886]	KDM5A	0.0152854	7.42473	0.131173	0.717219	0.989826	Unchanged
ENSG00000073670	protein_coding	ADAM metallopeptidase domain 11 [Source:HGNC Symbol;Acc:HGNC:189]	ADAM11	0.0103744	3.03841	0.00989836	0.920749	0.998208	Unchanged
ENSG00000073711	protein_coding	protein phosphatase 2 regulatory subunit B''alpha [Source:HGNC Symbol;Acc:HGNC:9307]	PPP2R3A	-0.00867191	5.01209	0.0261428	0.871552	0.998208	Unchanged
ENSG00000073712	protein_coding	fermitin family member 2 [Source:HGNC Symbol;Acc:HGNC:15767]	FERMT2	-0.0457485	6.53042	1.25869	0.261899	0.912292	Unchanged
ENSG00000073803	protein_coding	mitogen-activated protein kinase kinase kinase 13 [Source:HGNC Symbol;Acc:HGNC:6852]	MAP3K13	-0.0161877	5.31953	0.108363	0.742016	0.990714	Unchanged
ENSG00000073849	protein_coding	ST6 beta-galactoside alpha-2,6-sialyltransferase 1 [Source:HGNC Symbol;Acc:HGNC:10860]	ST6GAL1	0.0115849	3.51519	0.0150979	0.902207	0.998208	Unchanged
ENSG00000073861	protein_coding	T-box transcription factor 21 [Source:HGNC Symbol;Acc:HGNC:11599]	TBX21	1.32701	-1.86784	3.15842	0.0755362	0.787018	Unchanged
ENSG00000073905	processed_pseudogene	voltage dependent anion channel 1 pseudogene 1 [Source:HGNC Symbol;Acc:HGNC:12671]	VDAC1P1	-0.30885	-0.979424	0.512546	0.474039	0.969572	Unchanged
ENSG00000073910	protein_coding	FRY microtubule binding protein [Source:HGNC Symbol;Acc:HGNC:20367]	FRY	-0.0389368	6.08561	0.698229	0.403379	0.954361	Unchanged
ENSG00000073921	protein_coding	phosphatidylinositol binding clathrin assembly protein [Source:HGNC Symbol;Acc:HGNC:15514]	PICALM	-0.0577692	6.88048	2.28075	0.130989	0.855003	Unchanged
ENSG00000073969	protein_coding	N-ethylmaleimide sensitive factor, vesicle fusing ATPase [Source:HGNC Symbol;Acc:HGNC:8016]	NSF	-0.0412657	5.59275	0.745172	0.388009	0.951179	Unchanged
ENSG00000074047	protein_coding	GLI family zinc finger 2 [Source:HGNC Symbol;Acc:HGNC:4318]	GLI2	-0.0649233	2.32647	0.178648	0.672537	0.98482	Unchanged
ENSG00000074054	protein_coding	cytoplasmic linker associated protein 1 [Source:HGNC Symbol;Acc:HGNC:17088]	CLASP1	0.0062558	7.81386	0.0342938	0.853083	0.998208	Unchanged
ENSG00000074071	protein_coding	mitochondrial ribosomal protein S34 [Source:HGNC Symbol;Acc:HGNC:16618]	MRPS34	0.0658167	5.8004	1.9204	0.165813	0.873341	Unchanged
ENSG00000074181	protein_coding	notch receptor 3 [Source:HGNC Symbol;Acc:HGNC:7883]	NOTCH3	0.0150483	5.48135	0.0718213	0.788703	0.993175	Unchanged
ENSG00000074201	protein_coding	chloride nucleotide-sensitive channel 1A [Source:HGNC Symbol;Acc:HGNC:2080]	CLNS1A	0.0144566	7.18119	0.146006	0.702381	0.987246	Unchanged
ENSG00000074211	protein_coding	protein phosphatase 2 regulatory subunit Bgamma [Source:HGNC Symbol;Acc:HGNC:9306]	PPP2R2C	-0.131628	4.94631	4.24452	0.0393773	0.67825	Unchanged
ENSG00000074219	protein_coding	TEA domain transcription factor 2 [Source:HGNC Symbol;Acc:HGNC:11715]	TEAD2	0.0362608	4.39748	0.324926	0.568662	0.980546	Unchanged
ENSG00000074266	protein_coding	embryonic ectoderm development [Source:HGNC Symbol;Acc:HGNC:3188]	EED	-0.0511944	4.92263	0.684473	0.408051	0.954361	Unchanged
ENSG00000074317	protein_coding	synuclein beta [Source:HGNC Symbol;Acc:HGNC:11140]	SNCB	0.144688	1.20892	0.565181	0.45218	0.969015	Unchanged
ENSG00000074319	protein_coding	tumor susceptibility 101 [Source:HGNC Symbol;Acc:HGNC:15971]	TSG101	0.0413992	6.0707	0.956648	0.328033	0.933855	Unchanged
ENSG00000074356	protein_coding	nuclear cap binding subunit 3 [Source:HGNC Symbol;Acc:HGNC:24612]	NCBP3	-0.0102355	6.96587	0.070981	0.789914	0.993772	Unchanged
ENSG00000074370	protein_coding	ATPase sarcoplasmic/endoplasmic reticulum Ca2+ transporting 3 [Source:HGNC Symbol;Acc:HGNC:813]	ATP2A3	0.0369276	1.9911	0.0739848	0.785621	0.993101	Unchanged
ENSG00000074416	protein_coding	monoglyceride lipase [Source:HGNC Symbol;Acc:HGNC:17038]	MGLL	0.188984	1.73401	1.54369	0.214069	0.900706	Unchanged
ENSG00000074527	protein_coding	netrin 4 [Source:HGNC Symbol;Acc:HGNC:13658]	NTN4	0.22356	-0.330653	0.778553	0.377584	0.948292	Unchanged
ENSG00000074582	protein_coding	BCS1 homolog, ubiquinol-cytochrome c reductase complex chaperone [Source:HGNC Symbol;Acc:HGNC:1020]	BCS1L	-0.0971642	4.28516	2.03751	0.15346	0.867685	Unchanged
ENSG00000074590	protein_coding	NUAK family kinase 1 [Source:HGNC Symbol;Acc:HGNC:14311]	NUAK1	-0.0881951	1.31993	0.29737	0.585536	0.980546	Unchanged
ENSG00000074603	protein_coding	dipeptidyl peptidase 8 [Source:HGNC Symbol;Acc:HGNC:16490]	DPP8	0.10451	6.42285	5.94732	0.0147397	0.54099	Unchanged
ENSG00000074621	protein_coding	solute carrier family 24 member 1 [Source:HGNC Symbol;Acc:HGNC:10975]	SLC24A1	0.0308387	3.69748	0.165478	0.684163	0.986034	Unchanged
ENSG00000074657	protein_coding	zinc finger protein 532 [Source:HGNC Symbol;Acc:HGNC:30940]	ZNF532	0.0518344	7.46466	2.34479	0.125702	0.848938	Unchanged
ENSG00000074660	protein_coding	scavenger receptor class F member 1 [Source:HGNC Symbol;Acc:HGNC:16820]	SCARF1	-0.984593	-1.51582	2.7206	0.0990605	0.825821	Unchanged
ENSG00000074695	protein_coding	lectin, mannose binding 1 [Source:HGNC Symbol;Acc:HGNC:6631]	LMAN1	-0.0547072	7.24286	2.35853	0.124599	0.848131	Unchanged
ENSG00000074696	protein_coding	3-hydroxyacyl-CoA dehydratase 3 [Source:HGNC Symbol;Acc:HGNC:24175]	HACD3	-0.00602172	7.61451	0.0292855	0.864121	0.998208	Unchanged
ENSG00000074755	protein_coding	zinc finger ZZ-type and EF-hand domain containing 1 [Source:HGNC Symbol;Acc:HGNC:29027]	ZZEF1	-0.0315618	6.51948	0.658789	0.416988	0.95664	Unchanged
ENSG00000074771	protein_coding	NADPH oxidase 3 [Source:HGNC Symbol;Acc:HGNC:7890]	NOX3	0.136317	-1.6945	0.0562296	0.812558	0.996154	Unchanged
ENSG00000074800	protein_coding	enolase 1 [Source:HGNC Symbol;Acc:HGNC:3350]	ENO1	0.00855379	9.76091	0.0558637	0.813157	0.996176	Unchanged
ENSG00000074803	protein_coding	solute carrier family 12 member 1 [Source:HGNC Symbol;Acc:HGNC:10910]	SLC12A1	-0.185774	-0.743276	0.235853	0.627217	0.980546	Unchanged
ENSG00000074842	protein_coding	myeloid derived growth factor [Source:HGNC Symbol;Acc:HGNC:16948]	MYDGF	-0.0345548	4.78459	0.278464	0.597709	0.980546	Unchanged
ENSG00000074855	protein_coding	anoctamin 8 [Source:HGNC Symbol;Acc:HGNC:29329]	ANO8	0.0491502	5.21487	0.607939	0.435565	0.964137	Unchanged
ENSG00000074935	protein_coding	tubulin epsilon 1 [Source:HGNC Symbol;Acc:HGNC:20775]	TUBE1	0.00525377	4.83168	0.00754982	0.930759	0.998208	Unchanged
ENSG00000074964	protein_coding	Rho guanine nucleotide exchange factor 10 like [Source:HGNC Symbol;Acc:HGNC:25540]	ARHGEF10L	0.0221492	4.5638	0.117058	0.732248	0.990209	Unchanged
ENSG00000074966	protein_coding	TXK tyrosine kinase [Source:HGNC Symbol;Acc:HGNC:12434]	TXK	0.250041	-0.570717	0.402277	0.525916	0.97327	Unchanged
ENSG00000075035	protein_coding	WSC domain containing 2 [Source:HGNC Symbol;Acc:HGNC:29117]	WSCD2	0.22595	1.30992	1.07592	0.299612	0.925727	Unchanged
ENSG00000075043	protein_coding	potassium voltage-gated channel subfamily Q member 2 [Source:HGNC Symbol;Acc:HGNC:6296]	KCNQ2	-0.0536146	7.2261	1.37329	0.241247	0.906643	Unchanged
ENSG00000075089	protein_coding	actin related protein 6 [Source:HGNC Symbol;Acc:HGNC:24025]	ACTR6	-0.024547	5.43339	0.217719	0.640783	0.981784	Unchanged
ENSG00000075131	protein_coding	TIMELESS interacting protein [Source:HGNC Symbol;Acc:HGNC:30750]	TIPIN	0.118243	4.63889	3.08569	0.0789836	0.787018	Unchanged
ENSG00000075142	protein_coding	sorcin [Source:HGNC Symbol;Acc:HGNC:11292]	SRI	-0.019418	6.48389	0.233398	0.629016	0.980546	Unchanged
ENSG00000075151	protein_coding	eukaryotic translation initiation factor 4 gamma 3 [Source:HGNC Symbol;Acc:HGNC:3298]	EIF4G3	0.00739519	7.59565	0.0413283	0.838906	0.996274	Unchanged
ENSG00000075188	protein_coding	nucleoporin 37 [Source:HGNC Symbol;Acc:HGNC:29929]	NUP37	-0.0252301	4.47437	0.135396	0.712901	0.988739	Unchanged
ENSG00000075213	protein_coding	semaphorin 3A [Source:HGNC Symbol;Acc:HGNC:10723]	SEMA3A	0.0490765	0.995734	0.0754816	0.783517	0.993101	Unchanged
ENSG00000075218	protein_coding	G2 and S-phase expressed 1 [Source:HGNC Symbol;Acc:HGNC:13698]	GTSE1	-0.082497	6.82229	4.1692	0.0411653	0.68489	Unchanged
ENSG00000075223	protein_coding	semaphorin 3C [Source:HGNC Symbol;Acc:HGNC:10725]	SEMA3C	-0.0141755	6.85841	0.12035	0.728655	0.990209	Unchanged
ENSG00000075234	protein_coding	tetratricopeptide repeat domain 38 [Source:HGNC Symbol;Acc:HGNC:26082]	TTC38	-0.106351	4.51108	2.62108	0.105453	0.832438	Unchanged
ENSG00000075239	protein_coding	acetyl-CoA acetyltransferase 1 [Source:HGNC Symbol;Acc:HGNC:93]	ACAT1	-0.000695378	5.61619	0.000157275	0.989994	0.999523	Unchanged
ENSG00000075240	protein_coding	GRAM domain containing 4 [Source:HGNC Symbol;Acc:HGNC:29113]	GRAMD4	0.0447393	5.45115	0.776323	0.378268	0.94836	Unchanged
ENSG00000075290	protein_coding	Wnt family member 8B [Source:HGNC Symbol;Acc:HGNC:12789]	WNT8B	0.328558	-1.31465	0.712044	0.398766	0.953136	Unchanged
ENSG00000075292	protein_coding	zinc finger protein 638 [Source:HGNC Symbol;Acc:HGNC:17894]	ZNF638	-0.0233276	7.76731	0.23388	0.628662	0.980546	Unchanged
ENSG00000075303	protein_coding	solute carrier family 25 member 40 [Source:HGNC Symbol;Acc:HGNC:29680]	SLC25A40	-0.0240721	6.18758	0.261446	0.609128	0.980546	Unchanged
ENSG00000075336	protein_coding	translocase of inner mitochondrial membrane 21 [Source:HGNC Symbol;Acc:HGNC:25010]	TIMM21	-0.00497083	4.78566	0.00606423	0.937929	0.998208	Unchanged
ENSG00000075340	protein_coding	adducin 2 [Source:HGNC Symbol;Acc:HGNC:244]	ADD2	-0.0463537	7.52936	1.72159	0.189488	0.884529	Unchanged
ENSG00000075391	protein_coding	RAS protein activator like 2 [Source:HGNC Symbol;Acc:HGNC:9874]	RASAL2	-0.0120268	6.34653	0.076625	0.781924	0.993101	Unchanged
ENSG00000075399	protein_coding	VPS9 domain containing 1 [Source:HGNC Symbol;Acc:HGNC:13526]	VPS9D1	-0.138171	2.79453	1.96831	0.160627	0.871237	Unchanged
ENSG00000075407	protein_coding	zinc finger protein 37A [Source:HGNC Symbol;Acc:HGNC:13102]	ZNF37A	-0.103482	6.41124	3.61065	0.0574107	0.751515	Unchanged
ENSG00000075413	protein_coding	microtubule affinity regulating kinase 3 [Source:HGNC Symbol;Acc:HGNC:6897]	MARK3	-0.000177101	7.09721	2.40733e-05	0.996085	0.999523	Unchanged
ENSG00000075415	protein_coding	solute carrier family 25 member 3 [Source:HGNC Symbol;Acc:HGNC:10989]	SLC25A3	-0.00673628	8.07524	0.0249924	0.874386	0.998208	Unchanged
ENSG00000075420	protein_coding	fibronectin type III domain containing 3B [Source:HGNC Symbol;Acc:HGNC:24670]	FNDC3B	-0.0303313	5.28567	0.248762	0.617948	0.980546	Unchanged
ENSG00000075426	protein_coding	FOS like 2, AP-1 transcription factor subunit [Source:HGNC Symbol;Acc:HGNC:3798]	FOSL2	0.0078027	3.53257	0.00619104	0.937285	0.998208	Unchanged
ENSG00000075429	protein_coding	calcium voltage-gated channel auxiliary subunit gamma 5 [Source:HGNC Symbol;Acc:HGNC:1409]	CACNG5	-0.0504466	4.05158	0.516772	0.472222	0.969572	Unchanged
ENSG00000075461	protein_coding	calcium voltage-gated channel auxiliary subunit gamma 4 [Source:HGNC Symbol;Acc:HGNC:1408]	CACNG4	0.014566	9.13487	0.151384	0.697216	0.986578	Unchanged
ENSG00000075539	protein_coding	FRY like transcription coactivator [Source:HGNC Symbol;Acc:HGNC:29127]	FRYL	-0.0160383	6.9152	0.147162	0.701262	0.987004	Unchanged
ENSG00000075568	protein_coding	transmembrane protein 131 [Source:HGNC Symbol;Acc:HGNC:30366]	TMEM131	-0.00995304	6.53046	0.0559979	0.812937	0.996176	Unchanged
ENSG00000075618	protein_coding	fascin actin-bundling protein 1 [Source:HGNC Symbol;Acc:HGNC:11148]	FSCN1	0.0295359	9.33388	0.314548	0.574903	0.980546	Unchanged
ENSG00000075624	protein_coding	actin beta [Source:HGNC Symbol;Acc:HGNC:132]	ACTB	-0.0271902	11.6521	0.334535	0.563001	0.980269	Unchanged
ENSG00000075643	protein_coding	molybdenum cofactor sulfurase [Source:HGNC Symbol;Acc:HGNC:18234]	MOCOS	0.489658	-0.845003	1.4069	0.235572	0.90543	Unchanged
ENSG00000075651	protein_coding	phospholipase D1 [Source:HGNC Symbol;Acc:HGNC:9067]	PLD1	0.205468	-1.17456	0.15382	0.694911	0.986567	Unchanged
ENSG00000075702	protein_coding	WD repeat domain 62 [Source:HGNC Symbol;Acc:HGNC:24502]	WDR62	0.0460612	5.69292	0.59008	0.442388	0.965512	Unchanged
ENSG00000075711	protein_coding	discs large MAGUK scaffold protein 1 [Source:HGNC Symbol;Acc:HGNC:2900]	DLG1	0.00824953	6.90606	0.0398238	0.841825	0.996482	Unchanged
ENSG00000075785	protein_coding	RAB7A, member RAS oncogene family [Source:HGNC Symbol;Acc:HGNC:9788]	RAB7A	0.0202414	7.36222	0.279895	0.59677	0.980546	Unchanged
ENSG00000075790	protein_coding	B cell receptor associated protein 29 [Source:HGNC Symbol;Acc:HGNC:24131]	BCAP29	-0.143509	0.253405	0.332709	0.564068	0.980269	Unchanged
ENSG00000075826	protein_coding	SEC31 homolog B, COPII coat complex component [Source:HGNC Symbol;Acc:HGNC:23197]	SEC31B	0.0493268	2.74881	0.110968	0.739045	0.990393	Unchanged
ENSG00000075856	protein_coding	spliceosome associated factor 3, U4/U6 recycling protein [Source:HGNC Symbol;Acc:HGNC:16860]	SART3	-0.0231949	7.00877	0.400492	0.526835	0.97327	Unchanged
ENSG00000075914	protein_coding	exosome component 7 [Source:HGNC Symbol;Acc:HGNC:28112]	EXOSC7	0.0566485	4.37682	0.772557	0.379427	0.94836	Unchanged
ENSG00000075945	protein_coding	kinesin associated protein 3 [Source:HGNC Symbol;Acc:HGNC:17060]	KIFAP3	-0.0774563	6.39886	3.34267	0.0675051	0.77833	Unchanged
ENSG00000075975	protein_coding	makorin ring finger protein 2 [Source:HGNC Symbol;Acc:HGNC:7113]	MKRN2	-0.0813836	5.46317	2.74327	0.0976649	0.823411	Unchanged
ENSG00000076003	protein_coding	minichromosome maintenance complex component 6 [Source:HGNC Symbol;Acc:HGNC:6949]	MCM6	0.00328032	8.13905	0.00899263	0.92445	0.998208	Unchanged
ENSG00000076043	protein_coding	RNA exonuclease 2 [Source:HGNC Symbol;Acc:HGNC:17851]	REXO2	0.0786819	3.33045	0.551357	0.457764	0.969572	Unchanged
ENSG00000076053	protein_coding	RNA binding motif protein 7 [Source:HGNC Symbol;Acc:HGNC:9904]	RBM7	0.0362022	3.98557	0.249494	0.617432	0.980546	Unchanged
ENSG00000076067	protein_coding	RNA binding motif single stranded interacting protein 2 [Source:HGNC Symbol;Acc:HGNC:9909]	RBMS2	0.0337714	5.06446	0.273605	0.600924	0.980546	Unchanged
ENSG00000076108	protein_coding	bromodomain adjacent to zinc finger domain 2A [Source:HGNC Symbol;Acc:HGNC:962]	BAZ2A	-0.0953519	7.4951	5.42658	0.0198325	0.593574	Unchanged
ENSG00000076201	protein_coding	protein tyrosine phosphatase non-receptor type 23 [Source:HGNC Symbol;Acc:HGNC:14406]	PTPN23	-0.0183982	6.37192	0.17169	0.678614	0.98482	Unchanged
ENSG00000076242	protein_coding	mutL homolog 1 [Source:HGNC Symbol;Acc:HGNC:7127]	MLH1	0.0205039	6.15102	0.232975	0.629327	0.980546	Unchanged
ENSG00000076248	protein_coding	uracil DNA glycosylase [Source:HGNC Symbol;Acc:HGNC:12572]	UNG	0.053633	6.53393	1.49276	0.221788	0.901346	Unchanged
ENSG00000076321	protein_coding	kelch like family member 20 [Source:HGNC Symbol;Acc:HGNC:25056]	KLHL20	0.0309343	5.07631	0.34686	0.555896	0.979393	Unchanged
ENSG00000076344	protein_coding	regulator of G protein signaling 11 [Source:HGNC Symbol;Acc:HGNC:9993]	RGS11	0.0497178	2.53617	0.15084	0.697734	0.986578	Unchanged
ENSG00000076351	protein_coding	solute carrier family 46 member 1 [Source:HGNC Symbol;Acc:HGNC:30521]	SLC46A1	-0.119953	4.38245	3.36497	0.0665967	0.776799	Unchanged
ENSG00000076356	protein_coding	plexin A2 [Source:HGNC Symbol;Acc:HGNC:9100]	PLXNA2	-0.0524294	8.16115	0.897316	0.343502	0.940793	Unchanged
ENSG00000076382	protein_coding	sperm associated antigen 5 [Source:HGNC Symbol;Acc:HGNC:13452]	SPAG5	0.00265605	7.12738	0.00542319	0.941295	0.998208	Unchanged
ENSG00000076513	protein_coding	ankyrin repeat domain 13A [Source:HGNC Symbol;Acc:HGNC:21268]	ANKRD13A	-0.0246957	5.12981	0.189409	0.663409	0.983802	Unchanged
ENSG00000076554	protein_coding	tumor protein D52 [Source:HGNC Symbol;Acc:HGNC:12005]	TPD52	-0.101004	5.96902	5.48612	0.0191681	0.586115	Unchanged
ENSG00000076555	protein_coding	acetyl-CoA carboxylase beta [Source:HGNC Symbol;Acc:HGNC:85]	ACACB	-0.0633175	5.13613	1.35485	0.244432	0.906873	Unchanged
ENSG00000076604	protein_coding	TNF receptor associated factor 4 [Source:HGNC Symbol;Acc:HGNC:12034]	TRAF4	0.0827961	5.42499	2.492	0.114426	0.838467	Unchanged
ENSG00000076641	protein_coding	phosphoprotein membrane anchor with glycosphingolipid microdomains 1 [Source:HGNC Symbol;Acc:HGNC:30043]	PAG1	-0.162018	4.38832	5.93737	0.0148231	0.54099	Unchanged
ENSG00000076650	protein_coding	G-patch domain containing 1 [Source:HGNC Symbol;Acc:HGNC:24658]	GPATCH1	-0.0873858	4.11734	1.35263	0.244818	0.906959	Unchanged
ENSG00000076662	protein_coding	intercellular adhesion molecule 3 [Source:HGNC Symbol;Acc:HGNC:5346]	ICAM3	0.0684724	1.12469	0.105751	0.745034	0.990714	Unchanged
ENSG00000076685	protein_coding	5'-nucleotidase, cytosolic II [Source:HGNC Symbol;Acc:HGNC:8022]	NT5C2	-0.0224063	6.70729	0.28377	0.594241	0.980546	Unchanged
ENSG00000076706	protein_coding	melanoma cell adhesion molecule [Source:HGNC Symbol;Acc:HGNC:6934]	MCAM	0.0804719	4.33433	1.34522	0.246116	0.907195	Unchanged
ENSG00000076716	protein_coding	glypican 4 [Source:HGNC Symbol;Acc:HGNC:4452]	GPC4	0.120219	-0.0610951	0.175862	0.674953	0.98482	Unchanged
ENSG00000076770	protein_coding	muscleblind like splicing regulator 3 [Source:HGNC Symbol;Acc:HGNC:20564]	MBNL3	-0.016021	5.82295	0.0971457	0.755282	0.992257	Unchanged
ENSG00000076826	protein_coding	calmodulin regulated spectrin associated protein family member 3 [Source:HGNC Symbol;Acc:HGNC:29307]	CAMSAP3	-0.0901828	4.53271	1.73123	0.188254	0.884048	Unchanged
ENSG00000076864	protein_coding	RAP1 GTPase activating protein [Source:HGNC Symbol;Acc:HGNC:9858]	RAP1GAP	0.0501448	4.79951	0.501406	0.478883	0.969599	Unchanged
ENSG00000076924	protein_coding	XPA binding protein 2 [Source:HGNC Symbol;Acc:HGNC:14089]	XAB2	0.00328045	5.81993	0.00473648	0.945131	0.998208	Unchanged
ENSG00000076928	protein_coding	Rho guanine nucleotide exchange factor 1 [Source:HGNC Symbol;Acc:HGNC:681]	ARHGEF1	-0.00259185	6.0556	0.00296773	0.956555	0.998717	Unchanged
ENSG00000076984	protein_coding	mitogen-activated protein kinase kinase 7 [Source:HGNC Symbol;Acc:HGNC:6847]	MAP2K7	0.0383207	5.63815	0.633155	0.4262	0.959463	Unchanged
ENSG00000077044	protein_coding	diacylglycerol kinase delta [Source:HGNC Symbol;Acc:HGNC:2851]	DGKD	-0.0105104	6.162	0.0621212	0.803174	0.995803	Unchanged
ENSG00000077080	protein_coding	actin like 6B [Source:HGNC Symbol;Acc:HGNC:160]	ACTL6B	-0.0611181	5.25579	1.21552	0.270241	0.914023	Unchanged
ENSG00000077092	protein_coding	retinoic acid receptor beta [Source:HGNC Symbol;Acc:HGNC:9865]	RARB	-0.240411	1.62047	2.14437	0.143093	0.864353	Unchanged
ENSG00000077097	protein_coding	DNA topoisomerase II beta [Source:HGNC Symbol;Acc:HGNC:11990]	TOP2B	-0.0267535	9.14636	0.449064	0.50278	0.972467	Unchanged
ENSG00000077147	protein_coding	transmembrane 9 superfamily member 3 [Source:HGNC Symbol;Acc:HGNC:21529]	TM9SF3	-0.00960483	8.46007	0.0875856	0.767269	0.992936	Unchanged
ENSG00000077150	protein_coding	nuclear factor kappa B subunit 2 [Source:HGNC Symbol;Acc:HGNC:7795]	NFKB2	-0.121362	2.77738	1.17814	0.277735	0.91744	Unchanged
ENSG00000077152	protein_coding	ubiquitin conjugating enzyme E2 T [Source:HGNC Symbol;Acc:HGNC:25009]	UBE2T	0.0370441	6.62606	0.951433	0.329355	0.933855	Unchanged
ENSG00000077157	protein_coding	protein phosphatase 1 regulatory subunit 12B [Source:HGNC Symbol;Acc:HGNC:7619]	PPP1R12B	-0.0458723	6.14618	0.882072	0.347635	0.94328	Unchanged
ENSG00000077232	protein_coding	DnaJ heat shock protein family (Hsp40) member C10 [Source:HGNC Symbol;Acc:HGNC:24637]	DNAJC10	0.0246049	7.5037	0.402317	0.525895	0.97327	Unchanged
ENSG00000077235	protein_coding	general transcription factor IIIC subunit 1 [Source:HGNC Symbol;Acc:HGNC:4664]	GTF3C1	-0.0305929	7.50515	0.62809	0.428057	0.960241	Unchanged
ENSG00000077238	protein_coding	interleukin 4 receptor [Source:HGNC Symbol;Acc:HGNC:6015]	IL4R	-0.27309	-1.21291	0.264776	0.606858	0.980546	Unchanged
ENSG00000077254	protein_coding	ubiquitin specific peptidase 33 [Source:HGNC Symbol;Acc:HGNC:20059]	USP33	-0.0612378	7.02331	2.42187	0.119652	0.845938	Unchanged
ENSG00000077264	protein_coding	p21 (RAC1) activated kinase 3 [Source:HGNC Symbol;Acc:HGNC:8592]	PAK3	-0.12594	5.61247	4.99852	0.025369	0.622618	Unchanged
ENSG00000077279	protein_coding	doublecortin [Source:HGNC Symbol;Acc:HGNC:2714]	DCX	-0.0166699	6.89753	0.123555	0.72521	0.990209	Unchanged
ENSG00000077312	protein_coding	small nuclear ribonucleoprotein polypeptide A [Source:HGNC Symbol;Acc:HGNC:11151]	SNRPA	-0.00388294	6.43091	0.0100171	0.920276	0.998208	Unchanged
ENSG00000077327	protein_coding	sperm associated antigen 6 [Source:HGNC Symbol;Acc:HGNC:11215]	SPAG6	0.126574	2.66501	1.56516	0.210912	0.897784	Unchanged
ENSG00000077348	protein_coding	exosome component 5 [Source:HGNC Symbol;Acc:HGNC:24662]	EXOSC5	-0.00546077	4.33272	0.00563419	0.940166	0.998208	Unchanged
ENSG00000077380	protein_coding	dynein cytoplasmic 1 intermediate chain 2 [Source:HGNC Symbol;Acc:HGNC:2964]	DYNC1I2	-0.0119122	6.93528	0.0948092	0.75815	0.992476	Unchanged
ENSG00000077454	protein_coding	leucine rich repeats and calponin homology domain containing 4 [Source:HGNC Symbol;Acc:HGNC:6691]	LRCH4	-0.0313809	3.2039	0.100656	0.751044	0.992067	Unchanged
ENSG00000077458	protein_coding	family with sequence similarity 76 member B [Source:HGNC Symbol;Acc:HGNC:28492]	FAM76B	0.0105268	5.94451	0.0508885	0.821524	0.996176	Unchanged
ENSG00000077463	protein_coding	sirtuin 6 [Source:HGNC Symbol;Acc:HGNC:14934]	SIRT6	-0.0630369	3.94635	0.702314	0.402007	0.954255	Unchanged
ENSG00000077514	protein_coding	DNA polymerase delta 3, accessory subunit [Source:HGNC Symbol;Acc:HGNC:20932]	POLD3	0.0718874	5.75378	2.20165	0.137863	0.863426	Unchanged
ENSG00000077522	protein_coding	actinin alpha 2 [Source:HGNC Symbol;Acc:HGNC:164]	ACTN2	0.0431238	2.56254	0.133914	0.714408	0.989305	Unchanged
ENSG00000077549	protein_coding	capping actin protein of muscle Z-line subunit beta [Source:HGNC Symbol;Acc:HGNC:1491]	CAPZB	0.0456455	6.57426	1.12871	0.288051	0.921724	Unchanged
ENSG00000077585	protein_coding	G protein-coupled receptor 137B [Source:HGNC Symbol;Acc:HGNC:11862]	GPR137B	0.0138456	3.59329	0.028797	0.865249	0.998208	Unchanged
ENSG00000077616	protein_coding	N-acetylated alpha-linked acidic dipeptidase 2 [Source:HGNC Symbol;Acc:HGNC:14526]	NAALAD2	-0.0118959	4.79092	0.0415777	0.838427	0.996274	Unchanged
ENSG00000077684	protein_coding	jade family PHD finger 1 [Source:HGNC Symbol;Acc:HGNC:30027]	JADE1	0.0101743	6.71457	0.0776582	0.780496	0.993101	Unchanged
ENSG00000077721	protein_coding	ubiquitin conjugating enzyme E2 A [Source:HGNC Symbol;Acc:HGNC:12472]	UBE2A	-0.0448182	5.67254	0.779281	0.377361	0.948099	Unchanged
ENSG00000077782	protein_coding	fibroblast growth factor receptor 1 [Source:HGNC Symbol;Acc:HGNC:3688]	FGFR1	0.0100824	6.32419	0.0546097	0.815228	0.996176	Unchanged
ENSG00000077942	protein_coding	fibulin 1 [Source:HGNC Symbol;Acc:HGNC:3600]	FBLN1	-0.0405697	7.14842	0.748401	0.386983	0.950411	Unchanged
ENSG00000078018	protein_coding	microtubule associated protein 2 [Source:HGNC Symbol;Acc:HGNC:6839]	MAP2	-0.0583216	8.65109	1.98277	0.159099	0.871237	Unchanged
ENSG00000078043	protein_coding	protein inhibitor of activated STAT 2 [Source:HGNC Symbol;Acc:HGNC:17311]	PIAS2	0.0155971	5.9117	0.112775	0.737006	0.990209	Unchanged
ENSG00000078061	protein_coding	A-Raf proto-oncogene, serine/threonine kinase [Source:HGNC Symbol;Acc:HGNC:646]	ARAF	0.0168292	4.763	0.0547337	0.815022	0.996176	Unchanged
ENSG00000078070	protein_coding	methylcrotonoyl-CoA carboxylase 1 [Source:HGNC Symbol;Acc:HGNC:6936]	MCCC1	-0.0219278	4.69729	0.120559	0.728429	0.990209	Unchanged
ENSG00000078114	protein_coding	nebulette [Source:HGNC Symbol;Acc:HGNC:16932]	NEBL	-0.0379346	5.92779	0.449874	0.502395	0.972467	Unchanged
ENSG00000078124	protein_coding	alkaline ceramidase 3 [Source:HGNC Symbol;Acc:HGNC:16066]	ACER3	-0.0508001	5.89342	0.971002	0.32443	0.933855	Unchanged
ENSG00000078140	protein_coding	ubiquitin conjugating enzyme E2 K [Source:HGNC Symbol;Acc:HGNC:4914]	UBE2K	-0.0200159	7.44685	0.326955	0.567458	0.98052	Unchanged
ENSG00000078142	protein_coding	phosphatidylinositol 3-kinase catalytic subunit type 3 [Source:HGNC Symbol;Acc:HGNC:8974]	PIK3C3	-0.0494494	6.71152	1.59513	0.206594	0.894806	Unchanged
ENSG00000078177	protein_coding	NEDD4 binding protein 2 [Source:HGNC Symbol;Acc:HGNC:29851]	N4BP2	-0.0434938	7.03257	0.758078	0.383931	0.948591	Unchanged
ENSG00000078237	protein_coding	TP53 induced glycolysis regulatory phosphatase [Source:HGNC Symbol;Acc:HGNC:1185]	TIGAR	0.0808881	2.01509	0.235524	0.627458	0.980546	Unchanged
ENSG00000078246	protein_coding	TUB like protein 3 [Source:HGNC Symbol;Acc:HGNC:12425]	TULP3	-0.106039	5.1034	3.87001	0.0491563	0.71782	Unchanged
ENSG00000078269	protein_coding	synaptojanin 2 [Source:HGNC Symbol;Acc:HGNC:11504]	SYNJ2	0.027901	3.32058	0.0770928	0.781277	0.993101	Unchanged
ENSG00000078304	protein_coding	protein phosphatase 2 regulatory subunit B'gamma [Source:HGNC Symbol;Acc:HGNC:9311]	PPP2R5C	-0.0123063	7.39044	0.116193	0.733201	0.990209	Unchanged
ENSG00000078319	transcribed_unprocessed_pseudogene	PMS1 homolog 2, mismatch repair system component pseudogene 1 [Source:HGNC Symbol;Acc:HGNC:9123]	PMS2P1	0.141277	5.2416	5.45388	0.0195249	0.586283	Unchanged
ENSG00000078328	protein_coding	RNA binding fox-1 homolog 1 [Source:HGNC Symbol;Acc:HGNC:18222]	RBFOX1	-0.170718	1.86772	1.50102	0.220515	0.901346	Unchanged
ENSG00000078369	protein_coding	G protein subunit beta 1 [Source:HGNC Symbol;Acc:HGNC:4396]	GNB1	0.0223146	9.56899	0.493848	0.482216	0.970526	Unchanged
ENSG00000078401	protein_coding	endothelin 1 [Source:HGNC Symbol;Acc:HGNC:3176]	EDN1	0.215943	-1.24249	0.142797	0.705516	0.987435	Unchanged
ENSG00000078403	protein_coding	MLLT10 histone lysine methyltransferase DOT1L cofactor [Source:HGNC Symbol;Acc:HGNC:16063]	MLLT10	0.00674101	6.5192	0.0316904	0.858709	0.998208	Unchanged
ENSG00000078487	protein_coding	zinc finger CW-type and PWWP domain containing 1 [Source:HGNC Symbol;Acc:HGNC:23486]	ZCWPW1	0.205746	2.42243	3.40683	0.0649269	0.772788	Unchanged
ENSG00000078549	protein_coding	ADCYAP receptor type I [Source:HGNC Symbol;Acc:HGNC:242]	ADCYAP1R1	-0.0355697	7.72977	0.684594	0.408009	0.954361	Unchanged
ENSG00000078596	protein_coding	integral membrane protein 2A [Source:HGNC Symbol;Acc:HGNC:6173]	ITM2A	0.364059	-1.48015	0.535173	0.46444	0.969572	Unchanged
ENSG00000078618	protein_coding	nardilysin convertase [Source:HGNC Symbol;Acc:HGNC:7995]	NRDC	0.00225419	7.55107	0.00431463	0.947628	0.998208	Unchanged
ENSG00000078668	protein_coding	voltage dependent anion channel 3 [Source:HGNC Symbol;Acc:HGNC:12674]	VDAC3	-0.0202064	6.62441	0.225964	0.634533	0.980546	Unchanged
ENSG00000078674	protein_coding	pericentriolar material 1 [Source:HGNC Symbol;Acc:HGNC:8727]	PCM1	-0.0116729	8.18687	0.0783547	0.77954	0.993101	Unchanged
ENSG00000078687	protein_coding	trinucleotide repeat containing adaptor 6C [Source:HGNC Symbol;Acc:HGNC:29318]	TNRC6C	0.0457564	7.28811	1.3395	0.247122	0.907195	Unchanged
ENSG00000078699	protein_coding	CBFA2/RUNX1 partner transcriptional co-repressor 2 [Source:HGNC Symbol;Acc:HGNC:1536]	CBFA2T2	-0.00913501	7.4753	0.0601898	0.806196	0.996154	Unchanged
ENSG00000078725	protein_coding	BMP/retinoic acid inducible neural specific 1 [Source:HGNC Symbol;Acc:HGNC:2687]	BRINP1	-0.154061	2.06013	0.744317	0.388282	0.951351	Unchanged
ENSG00000078747	protein_coding	itchy E3 ubiquitin protein ligase [Source:HGNC Symbol;Acc:HGNC:13890]	ITCH	0.0156027	5.90744	0.112039	0.737835	0.990209	Unchanged
ENSG00000078804	protein_coding	tumor protein p53 inducible nuclear protein 2 [Source:HGNC Symbol;Acc:HGNC:16104]	TP53INP2	0.0251695	4.67845	0.121218	0.727717	0.990209	Unchanged
ENSG00000078808	protein_coding	stromal cell derived factor 4 [Source:HGNC Symbol;Acc:HGNC:24188]	SDF4	0.0763671	6.19344	2.83407	0.092284	0.814537	Unchanged
ENSG00000078814	protein_coding	myosin heavy chain 7B [Source:HGNC Symbol;Acc:HGNC:15906]	MYH7B	-0.419313	-0.694483	1.44122	0.229942	0.903139	Unchanged
ENSG00000078900	protein_coding	tumor protein p73 [Source:HGNC Symbol;Acc:HGNC:12003]	TP73	0.0502589	4.78213	0.509348	0.475421	0.969572	Unchanged
ENSG00000078902	protein_coding	toll interacting protein [Source:HGNC Symbol;Acc:HGNC:16476]	TOLLIP	-0.0899111	4.73846	1.76824	0.183599	0.881555	Unchanged
ENSG00000078967	protein_coding	ubiquitin conjugating enzyme E2 D4 (putative) [Source:HGNC Symbol;Acc:HGNC:21647]	UBE2D4	-0.0486329	6.30371	1.23882	0.265698	0.913569	Unchanged
ENSG00000079101	protein_coding	clusterin like 1 [Source:HGNC Symbol;Acc:HGNC:2096]	CLUL1	0.138664	-0.946966	0.120443	0.728554	0.990209	Unchanged
ENSG00000079102	protein_coding	RUNX1 partner transcriptional co-repressor 1 [Source:HGNC Symbol;Acc:HGNC:1535]	RUNX1T1	0.135352	5.50698	6.58781	0.010268	0.476335	Unchanged
ENSG00000079134	protein_coding	THO complex 1 [Source:HGNC Symbol;Acc:HGNC:19070]	THOC1	0.0837446	6.01686	2.36732	0.1239	0.848131	Unchanged
ENSG00000079150	protein_coding	FKBP prolyl isomerase 7 [Source:HGNC Symbol;Acc:HGNC:3723]	FKBP7	0.0373613	5.15966	0.481358	0.487808	0.971573	Unchanged
ENSG00000079156	protein_coding	oxysterol binding protein like 6 [Source:HGNC Symbol;Acc:HGNC:16388]	OSBPL6	0.0848326	4.14842	1.23051	0.267307	0.914023	Unchanged
ENSG00000079246	protein_coding	X-ray repair cross complementing 5 [Source:HGNC Symbol;Acc:HGNC:12833]	XRCC5	0.029436	9.63333	0.756468	0.384436	0.948794	Unchanged
ENSG00000079277	protein_coding	MAPK interacting serine/threonine kinase 1 [Source:HGNC Symbol;Acc:HGNC:7110]	MKNK1	0.0656875	3.74518	0.634142	0.42584	0.959323	Unchanged
ENSG00000079308	protein_coding	tensin 1 [Source:HGNC Symbol;Acc:HGNC:11973]	TNS1	-0.0293203	5.89644	0.403635	0.525218	0.97327	Unchanged
ENSG00000079313	protein_coding	RNA exonuclease 1 homolog [Source:HGNC Symbol;Acc:HGNC:24616]	REXO1	0.0314021	5.5456	0.363633	0.546495	0.978455	Unchanged
ENSG00000079332	protein_coding	secretion associated Ras related GTPase 1A [Source:HGNC Symbol;Acc:HGNC:10534]	SAR1A	0.00981282	7.26073	0.0757316	0.783167	0.993101	Unchanged
ENSG00000079335	protein_coding	cell division cycle 14A [Source:HGNC Symbol;Acc:HGNC:1718]	CDC14A	-0.303533	3.36438	11.9977	0.000532652	0.146172	Unchanged
ENSG00000079337	protein_coding	Rap guanine nucleotide exchange factor 3 [Source:HGNC Symbol;Acc:HGNC:16629]	RAPGEF3	0.218828	-0.0561122	0.48642	0.485529	0.971573	Unchanged
ENSG00000079387	protein_coding	SUMO specific peptidase 1 [Source:HGNC Symbol;Acc:HGNC:17927]	SENP1	0.0319969	6.29612	0.56561	0.452008	0.968919	Unchanged
ENSG00000079432	protein_coding	capicua transcriptional repressor [Source:HGNC Symbol;Acc:HGNC:14214]	CIC	-0.0129851	6.81599	0.0865232	0.768645	0.992936	Unchanged
ENSG00000079435	protein_coding	lipase E, hormone sensitive type [Source:HGNC Symbol;Acc:HGNC:6621]	LIPE	-0.00312054	3.13341	0.000919831	0.975805	0.998791	Unchanged
ENSG00000079459	protein_coding	farnesyl-diphosphate farnesyltransferase 1 [Source:HGNC Symbol;Acc:HGNC:3629]	FDFT1	0.0203956	6.84236	0.243177	0.621921	0.980546	Unchanged
ENSG00000079462	protein_coding	platelet activating factor acetylhydrolase 1b catalytic subunit 3 [Source:HGNC Symbol;Acc:HGNC:8576]	PAFAH1B3	0.0233619	5.90729	0.188883	0.663848	0.98387	Unchanged
ENSG00000079482	protein_coding	oligophrenin 1 [Source:HGNC Symbol;Acc:HGNC:8148]	OPHN1	0.0523421	4.06327	0.466284	0.494702	0.972467	Unchanged
ENSG00000079616	protein_coding	kinesin family member 22 [Source:HGNC Symbol;Acc:HGNC:6391]	KIF22	0.0438287	6.92847	1.36104	0.243357	0.906873	Unchanged
ENSG00000079689	protein_coding	secretagogin, EF-hand calcium binding protein [Source:HGNC Symbol;Acc:HGNC:16941]	SCGN	-0.289476	1.21237	2.51759	0.112582	0.836423	Unchanged
ENSG00000079691	protein_coding	capping protein regulator and myosin 1 linker 1 [Source:HGNC Symbol;Acc:HGNC:21581]	CARMIL1	-0.163806	2.88205	2.10767	0.146563	0.864353	Unchanged
ENSG00000079739	protein_coding	phosphoglucomutase 1 [Source:HGNC Symbol;Acc:HGNC:8905]	PGM1	0.0084571	5.8238	0.0365703	0.848343	0.998123	Unchanged
ENSG00000079785	protein_coding	DEAD-box helicase 1 [Source:HGNC Symbol;Acc:HGNC:2734]	DDX1	0.0516065	7.76889	2.12921	0.144515	0.864353	Unchanged
ENSG00000079805	protein_coding	dynamin 2 [Source:HGNC Symbol;Acc:HGNC:2974]	DNM2	0.0156145	6.83998	0.150585	0.697977	0.986578	Unchanged
ENSG00000079841	protein_coding	regulating synaptic membrane exocytosis 1 [Source:HGNC Symbol;Acc:HGNC:17282]	RIMS1	0.0561934	3.08796	0.311637	0.576677	0.980546	Unchanged
ENSG00000079950	protein_coding	syntaxin 7 [Source:HGNC Symbol;Acc:HGNC:11442]	STX7	-0.0600872	3.89986	0.66682	0.414162	0.95664	Unchanged
ENSG00000079974	protein_coding	RAB, member of RAS oncogene family like 2B [Source:HGNC Symbol;Acc:HGNC:9800]	RABL2B	0.0619159	4.49983	0.837476	0.36012	0.944807	Unchanged
ENSG00000079999	protein_coding	kelch like ECH associated protein 1 [Source:HGNC Symbol;Acc:HGNC:23177]	KEAP1	0.0090934	5.70757	0.0312602	0.859661	0.998208	Unchanged
ENSG00000080031	protein_coding	protein tyrosine phosphatase receptor type H [Source:HGNC Symbol;Acc:HGNC:9672]	PTPRH	-0.2285	1.27317	1.5457	0.213771	0.900706	Unchanged
ENSG00000080166	protein_coding	dopachrome tautomerase [Source:HGNC Symbol;Acc:HGNC:2709]	DCT	1.1368	-1.23303	5.81279	0.01591	0.547401	Unchanged
ENSG00000080189	protein_coding	solute carrier family 35 member C2 [Source:HGNC Symbol;Acc:HGNC:17117]	SLC35C2	-0.0158851	5.81433	0.120275	0.728736	0.990209	Unchanged
ENSG00000080200	protein_coding	crystallin beta-gamma domain containing 3 [Source:HGNC Symbol;Acc:HGNC:34427]	CRYBG3	-0.113065	4.04857	2.13122	0.144325	0.864353	Unchanged
ENSG00000080224	protein_coding	EPH receptor A6 [Source:HGNC Symbol;Acc:HGNC:19296]	EPHA6	0.0788346	1.4676	0.285685	0.592999	0.980546	Unchanged
ENSG00000080298	protein_coding	regulatory factor X3 [Source:HGNC Symbol;Acc:HGNC:9984]	RFX3	-0.0271687	6.38144	0.307473	0.579235	0.980546	Unchanged
ENSG00000080345	protein_coding	replication timing regulatory factor 1 [Source:HGNC Symbol;Acc:HGNC:23207]	RIF1	0.00933269	8.36257	0.0379436	0.845556	0.997567	Unchanged
ENSG00000080371	protein_coding	RAB21, member RAS oncogene family [Source:HGNC Symbol;Acc:HGNC:18263]	RAB21	-0.0506857	5.65317	0.984431	0.321107	0.933381	Unchanged
ENSG00000080503	protein_coding	SWI/SNF related, matrix associated, actin dependent regulator of chromatin, subfamily a, member 2 [Source:HGNC Symbol;Acc:HGNC:11098]	SMARCA2	-0.063299	5.5733	1.72009	0.189682	0.884529	Unchanged
ENSG00000080546	protein_coding	sestrin 1 [Source:HGNC Symbol;Acc:HGNC:21595]	SESN1	-0.0562708	4.71086	0.94041	0.332173	0.934997	Unchanged
ENSG00000080603	protein_coding	Snf2 related CREBBP activator protein [Source:HGNC Symbol;Acc:HGNC:16974]	SRCAP	0.102752	4.11216	1.89923	0.168164	0.874427	Unchanged
ENSG00000080608	protein_coding	pumilio RNA binding family member 3 [Source:HGNC Symbol;Acc:HGNC:29676]	PUM3	0.0412258	6.28658	0.895096	0.3441	0.941199	Unchanged
ENSG00000080644	protein_coding	cholinergic receptor nicotinic alpha 3 subunit [Source:HGNC Symbol;Acc:HGNC:1957]	CHRNA3	-0.0552959	7.6221	1.45762	0.227309	0.901346	Unchanged
ENSG00000080802	protein_coding	CCR4-NOT transcription complex subunit 4 [Source:HGNC Symbol;Acc:HGNC:7880]	CNOT4	-0.0111394	5.7252	0.0578662	0.809901	0.996154	Unchanged
ENSG00000080815	protein_coding	presenilin 1 [Source:HGNC Symbol;Acc:HGNC:9508]	PSEN1	-0.0165796	6.32847	0.142024	0.706278	0.987435	Unchanged
ENSG00000080819	protein_coding	coproporphyrinogen oxidase [Source:HGNC Symbol;Acc:HGNC:2321]	CPOX	-0.0495704	4.16868	0.461645	0.496856	0.972467	Unchanged
ENSG00000080822	protein_coding	claudin domain containing 1 [Source:HGNC Symbol;Acc:HGNC:1322]	CLDND1	0.0417027	6.39656	1.01721	0.313181	0.93049	Unchanged
ENSG00000080823	protein_coding	MOK protein kinase [Source:HGNC Symbol;Acc:HGNC:9833]	MOK	-0.110055	2.72171	1.06885	0.301205	0.925776	Unchanged
ENSG00000080824	protein_coding	heat shock protein 90 alpha family class A member 1 [Source:HGNC Symbol;Acc:HGNC:5253]	HSP90AA1	0.0108991	10.7193	0.0809729	0.775983	0.993101	Unchanged
ENSG00000080839	protein_coding	RB transcriptional corepressor like 1 [Source:HGNC Symbol;Acc:HGNC:9893]	RBL1	0.0880998	5.75171	2.93565	0.0866438	0.804053	Unchanged
ENSG00000080845	protein_coding	DLG associated protein 4 [Source:HGNC Symbol;Acc:HGNC:24476]	DLGAP4	-0.0266011	6.70016	0.421095	0.516391	0.973159	Unchanged
ENSG00000080854	protein_coding	immunoglobulin superfamily member 9B [Source:HGNC Symbol;Acc:HGNC:32326]	IGSF9B	-0.0861111	8.5399	5.19559	0.0226443	0.606879	Unchanged
ENSG00000080947	transcribed_unprocessed_pseudogene	CROCC pseudogene 3 [Source:HGNC Symbol;Acc:HGNC:29405]	CROCCP3	-0.0648921	5.17561	1.09144	0.296152	0.925359	Unchanged
ENSG00000080986	protein_coding	NDC80 kinetochore complex component [Source:HGNC Symbol;Acc:HGNC:16909]	NDC80	-0.0598974	6.05791	1.92386	0.165432	0.873341	Unchanged
ENSG00000081014	protein_coding	adaptor related protein complex 4 subunit epsilon 1 [Source:HGNC Symbol;Acc:HGNC:573]	AP4E1	0.0167779	5.48695	0.0929884	0.760412	0.992571	Unchanged
ENSG00000081019	protein_coding	round spermatid basic protein 1 [Source:HGNC Symbol;Acc:HGNC:25642]	RSBN1	-0.00486861	5.99993	0.00962558	0.921845	0.998208	Unchanged
ENSG00000081026	protein_coding	membrane associated guanylate kinase, WW and PDZ domain containing 3 [Source:HGNC Symbol;Acc:HGNC:29647]	MAGI3	-0.0432577	7.48503	1.73597	0.187651	0.884048	Unchanged
ENSG00000081059	protein_coding	transcription factor 7 [Source:HGNC Symbol;Acc:HGNC:11639]	TCF7	-0.000120463	5.44802	4.88808e-06	0.998236	0.999523	Unchanged
ENSG00000081087	protein_coding	osteoclastogenesis associated transmembrane protein 1 [Source:HGNC Symbol;Acc:HGNC:21652]	OSTM1	-0.0242112	4.18806	0.0985193	0.753614	0.992257	Unchanged
ENSG00000081148	protein_coding	interphotoreceptor matrix proteoglycan 2 [Source:HGNC Symbol;Acc:HGNC:18362]	IMPG2	0.550191	-1.19395	1.28355	0.257239	0.912292	Unchanged
ENSG00000081154	protein_coding	PEST proteolytic signal containing nuclear protein [Source:HGNC Symbol;Acc:HGNC:30023]	PCNP	-0.0253812	7.43659	0.380252	0.537469	0.976159	Unchanged
ENSG00000081177	protein_coding	exonuclease 3'-5' domain containing 2 [Source:HGNC Symbol;Acc:HGNC:20217]	EXD2	-0.00881334	5.52715	0.0302263	0.861978	0.998208	Unchanged
ENSG00000081181	protein_coding	arginase 2 [Source:HGNC Symbol;Acc:HGNC:664]	ARG2	-0.00208943	4.44736	0.0011043	0.97349	0.998791	Unchanged
ENSG00000081189	protein_coding	myocyte enhancer factor 2C [Source:HGNC Symbol;Acc:HGNC:6996]	MEF2C	0.0855772	2.9299	0.742475	0.388869	0.951351	Unchanged
ENSG00000081307	protein_coding	ubiquitin like modifier activating enzyme 5 [Source:HGNC Symbol;Acc:HGNC:23230]	UBA5	0.000892581	6.13174	0.000359104	0.984881	0.999523	Unchanged
ENSG00000081320	protein_coding	serine/threonine kinase 17b [Source:HGNC Symbol;Acc:HGNC:11396]	STK17B	-0.107246	3.8023	2.08635	0.14862	0.865048	Unchanged
ENSG00000081377	protein_coding	cell division cycle 14B [Source:HGNC Symbol;Acc:HGNC:1719]	CDC14B	-0.0587121	5.38436	1.18856	0.275621	0.916102	Unchanged
ENSG00000081386	protein_coding	zinc finger protein 510 [Source:HGNC Symbol;Acc:HGNC:29161]	ZNF510	-0.105863	6.08937	5.15058	0.0232386	0.610577	Unchanged
ENSG00000081665	protein_coding	zinc finger protein 506 [Source:HGNC Symbol;Acc:HGNC:23780]	ZNF506	0.0238169	5.16128	0.104921	0.746003	0.990714	Unchanged
ENSG00000081692	protein_coding	jumonji domain containing 4 [Source:HGNC Symbol;Acc:HGNC:25724]	JMJD4	-0.0812702	4.22322	1.13873	0.285922	0.920506	Unchanged
ENSG00000081721	protein_coding	dual specificity phosphatase 12 [Source:HGNC Symbol;Acc:HGNC:3067]	DUSP12	0.124533	5.28793	5.18804	0.0227428	0.607494	Unchanged
ENSG00000081760	protein_coding	acetoacetyl-CoA synthetase [Source:HGNC Symbol;Acc:HGNC:21298]	AACS	0.0642717	4.90765	1.14155	0.285325	0.920311	Unchanged
ENSG00000081791	protein_coding	DAP3 binding cell death enhancer 1 [Source:HGNC Symbol;Acc:HGNC:28969]	DELE1	0.0393044	6.28275	0.948282	0.330157	0.933855	Unchanged
ENSG00000081818	protein_coding	protocadherin beta 4 [Source:HGNC Symbol;Acc:HGNC:8689]	PCDHB4	-0.0464252	4.08939	0.390119	0.532237	0.974814	Unchanged
ENSG00000081842	protein_coding	protocadherin alpha 6 [Source:HGNC Symbol;Acc:HGNC:8672]	PCDHA6	0.0763619	-0.674416	0.0500721	0.822938	0.996176	Unchanged
ENSG00000081853	protein_coding	protocadherin gamma subfamily A, 2 [Source:HGNC Symbol;Acc:HGNC:8700]	PCDHGA2	0.00671747	1.19306	0.00158718	0.968221	0.998791	Unchanged
ENSG00000081870	protein_coding	heat shock protein family B (small) member 11 [Source:HGNC Symbol;Acc:HGNC:25019]	HSPB11	0.0428785	4.92952	0.52984	0.466674	0.969572	Unchanged
ENSG00000081913	protein_coding	PH domain and leucine rich repeat protein phosphatase 1 [Source:HGNC Symbol;Acc:HGNC:20610]	PHLPP1	-0.0645893	4.60104	1.0691	0.301148	0.925776	Unchanged
ENSG00000081985	protein_coding	interleukin 12 receptor subunit beta 2 [Source:HGNC Symbol;Acc:HGNC:5972]	IL12RB2	-0.0443779	-0.13687	0.0133146	0.908137	0.998208	Unchanged
ENSG00000082014	protein_coding	SWI/SNF related, matrix associated, actin dependent regulator of chromatin, subfamily d, member 3 [Source:HGNC Symbol;Acc:HGNC:11108]	SMARCD3	0.0459679	5.16694	0.532035	0.465753	0.969572	Unchanged
ENSG00000082068	protein_coding	WD repeat domain 70 [Source:HGNC Symbol;Acc:HGNC:25495]	WDR70	0.0754949	4.96617	1.90978	0.166988	0.873341	Unchanged
ENSG00000082146	protein_coding	STE20 related adaptor beta [Source:HGNC Symbol;Acc:HGNC:13205]	STRADB	-0.0417919	4.49013	0.448818	0.502897	0.972467	Unchanged
ENSG00000082153	protein_coding	basic leucine zipper and W2 domains 1 [Source:HGNC Symbol;Acc:HGNC:18380]	BZW1	-0.000955324	7.23074	0.000626357	0.980033	0.999244	Unchanged
ENSG00000082196	protein_coding	C1q and TNF related 3 [Source:HGNC Symbol;Acc:HGNC:14326]	C1QTNF3	0.0269024	3.23112	0.101224	0.750366	0.992067	Unchanged
ENSG00000082212	protein_coding	malic enzyme 2 [Source:HGNC Symbol;Acc:HGNC:6984]	ME2	-0.0541459	6.86803	2.09914	0.147382	0.864353	Unchanged
ENSG00000082213	protein_coding	chromosome 5 open reading frame 22 [Source:HGNC Symbol;Acc:HGNC:25639]	C5orf22	0.0112605	5.53448	0.0520644	0.819509	0.996176	Unchanged
ENSG00000082258	protein_coding	cyclin T2 [Source:HGNC Symbol;Acc:HGNC:1600]	CCNT2	0.0257329	6.73512	0.382308	0.53637	0.976159	Unchanged
ENSG00000082269	protein_coding	family with sequence similarity 135 member A [Source:HGNC Symbol;Acc:HGNC:21084]	FAM135A	-0.0267497	4.90372	0.225657	0.634763	0.980546	Unchanged
ENSG00000082397	protein_coding	erythrocyte membrane protein band 4.1 like 3 [Source:HGNC Symbol;Acc:HGNC:3380]	EPB41L3	-0.597641	-0.962989	1.91441	0.166474	0.873341	Unchanged
ENSG00000082438	protein_coding	cordon-bleu WH2 repeat protein like 1 [Source:HGNC Symbol;Acc:HGNC:23571]	COBLL1	0.00578277	3.62117	0.00325433	0.954508	0.998683	Unchanged
ENSG00000082458	protein_coding	discs large MAGUK scaffold protein 3 [Source:HGNC Symbol;Acc:HGNC:2902]	DLG3	-0.171938	4.27693	6.01798	0.0141609	0.530355	Unchanged
ENSG00000082497	protein_coding	SERTA domain containing 4 [Source:HGNC Symbol;Acc:HGNC:25236]	SERTAD4	0.0947535	6.15165	4.23096	0.0396929	0.679797	Unchanged
ENSG00000082512	protein_coding	TNF receptor associated factor 5 [Source:HGNC Symbol;Acc:HGNC:12035]	TRAF5	-0.0431271	6.11816	0.822447	0.364466	0.945863	Unchanged
ENSG00000082515	protein_coding	mitochondrial ribosomal protein L22 [Source:HGNC Symbol;Acc:HGNC:14480]	MRPL22	-0.0297141	4.25073	0.167779	0.682094	0.985184	Unchanged
ENSG00000082516	protein_coding	gem nuclear organelle associated protein 5 [Source:HGNC Symbol;Acc:HGNC:20043]	GEMIN5	-0.0992189	6.13865	4.30728	0.0379496	0.677392	Unchanged
ENSG00000082641	protein_coding	nuclear factor, erythroid 2 like 1 [Source:HGNC Symbol;Acc:HGNC:7781]	NFE2L1	0.0137426	7.91886	0.168379	0.681557	0.985184	Unchanged
ENSG00000082684	protein_coding	semaphorin 5B [Source:HGNC Symbol;Acc:HGNC:10737]	SEMA5B	0.297012	1.72194	3.10627	0.0779913	0.787018	Unchanged
ENSG00000082701	protein_coding	glycogen synthase kinase 3 beta [Source:HGNC Symbol;Acc:HGNC:4617]	GSK3B	0.0318845	7.55946	0.836521	0.360394	0.944807	Unchanged
ENSG00000082781	protein_coding	integrin subunit beta 5 [Source:HGNC Symbol;Acc:HGNC:6160]	ITGB5	-0.369609	-0.0296842	1.53302	0.21566	0.900874	Unchanged
ENSG00000082805	protein_coding	ELKS/RAB6-interacting/CAST family member 1 [Source:HGNC Symbol;Acc:HGNC:17072]	ERC1	0.00513723	7.02348	0.0168603	0.896687	0.998208	Unchanged
ENSG00000082898	protein_coding	exportin 1 [Source:HGNC Symbol;Acc:HGNC:12825]	XPO1	-0.066341	9.1298	3.99035	0.0457617	0.709882	Unchanged
ENSG00000082996	protein_coding	ring finger protein 13 [Source:HGNC Symbol;Acc:HGNC:10057]	RNF13	0.0916802	4.71648	2.00028	0.157271	0.870946	Unchanged
ENSG00000083093	protein_coding	partner and localizer of BRCA2 [Source:HGNC Symbol;Acc:HGNC:26144]	PALB2	0.0559681	5.31902	0.994083	0.318746	0.932223	Unchanged
ENSG00000083097	protein_coding	DOP1 leucine zipper like protein A [Source:HGNC Symbol;Acc:HGNC:21194]	DOP1A	-0.0192249	5.39817	0.155787	0.693065	0.986442	Unchanged
ENSG00000083099	protein_coding	LYR motif containing 2 [Source:HGNC Symbol;Acc:HGNC:25229]	LYRM2	-0.108265	5.86369	4.54404	0.0330335	0.657432	Unchanged
ENSG00000083123	protein_coding	branched chain keto acid dehydrogenase E1 subunit beta [Source:HGNC Symbol;Acc:HGNC:987]	BCKDHB	0.0270604	4.87419	0.185474	0.66671	0.984459	Unchanged
ENSG00000083168	protein_coding	lysine acetyltransferase 6A [Source:HGNC Symbol;Acc:HGNC:13013]	KAT6A	-0.0612708	7.44906	3.23059	0.0722748	0.782824	Unchanged
ENSG00000083223	protein_coding	terminal uridylyl transferase 7 [Source:HGNC Symbol;Acc:HGNC:25817]	TUT7	-0.086018	4.99499	2.24261	0.134255	0.860073	Unchanged
ENSG00000083290	protein_coding	unc-51 like autophagy activating kinase 2 [Source:HGNC Symbol;Acc:HGNC:13480]	ULK2	0.0125701	6.07251	0.0839657	0.771993	0.993101	Unchanged
ENSG00000083312	protein_coding	transportin 1 [Source:HGNC Symbol;Acc:HGNC:6401]	TNPO1	0.0153612	8.77089	0.212114	0.645115	0.982638	Unchanged
ENSG00000083444	protein_coding	procollagen-lysine,2-oxoglutarate 5-dioxygenase 1 [Source:HGNC Symbol;Acc:HGNC:9081]	PLOD1	-0.0262812	5.83828	0.316323	0.573826	0.980546	Unchanged
ENSG00000083454	protein_coding	purinergic receptor P2X 5 [Source:HGNC Symbol;Acc:HGNC:8536]	P2RX5	-0.0473678	1.43834	0.0645975	0.799372	0.994737	Unchanged
ENSG00000083457	protein_coding	integrin subunit alpha E [Source:HGNC Symbol;Acc:HGNC:6147]	ITGAE	0.0807562	3.69411	0.804812	0.369658	0.94626	Unchanged
ENSG00000083520	protein_coding	DIS3 homolog, exosome endoribonuclease and 3'-5' exoribonuclease [Source:HGNC Symbol;Acc:HGNC:20604]	DIS3	0.032182	7.33477	0.650885	0.419797	0.957249	Unchanged
ENSG00000083535	protein_coding	progesterone immunomodulatory binding factor 1 [Source:HGNC Symbol;Acc:HGNC:23352]	PIBF1	-0.027195	5.58158	0.189937	0.662969	0.983802	Unchanged
ENSG00000083544	protein_coding	tudor domain containing 3 [Source:HGNC Symbol;Acc:HGNC:20612]	TDRD3	-0.038453	5.41638	0.565417	0.452086	0.968919	Unchanged
ENSG00000083635	protein_coding	nuclear FMR1 interacting protein 1 [Source:HGNC Symbol;Acc:HGNC:8057]	NUFIP1	-0.0436406	4.61118	0.539254	0.462742	0.969572	Unchanged
ENSG00000083642	protein_coding	PDS5 cohesin associated factor B [Source:HGNC Symbol;Acc:HGNC:20418]	PDS5B	-0.0169012	7.54723	0.217668	0.640823	0.981784	Unchanged
ENSG00000083720	protein_coding	3-oxoacid CoA-transferase 1 [Source:HGNC Symbol;Acc:HGNC:8527]	OXCT1	-0.0123813	6.37637	0.0783845	0.779499	0.993101	Unchanged
ENSG00000083750	protein_coding	Ras related GTP binding B [Source:HGNC Symbol;Acc:HGNC:19901]	RRAGB	-0.00531676	3.45749	0.00434941	0.947418	0.998208	Unchanged
ENSG00000083799	protein_coding	CYLD lysine 63 deubiquitinase [Source:HGNC Symbol;Acc:HGNC:2584]	CYLD	-0.00150804	5.77631	0.00115574	0.97288	0.998791	Unchanged
ENSG00000083807	protein_coding	solute carrier family 27 member 5 [Source:HGNC Symbol;Acc:HGNC:10999]	SLC27A5	-0.145857	2.29261	1.27978	0.25794	0.912292	Unchanged
ENSG00000083812	protein_coding	zinc finger protein 324 [Source:HGNC Symbol;Acc:HGNC:14096]	ZNF324	-0.0204118	4.16143	0.0767374	0.781769	0.993101	Unchanged
ENSG00000083817	protein_coding	zinc finger protein 416 [Source:HGNC Symbol;Acc:HGNC:20645]	ZNF416	0.0354829	3.10941	0.147654	0.700787	0.987004	Unchanged
ENSG00000083828	protein_coding	zinc finger protein 586 [Source:HGNC Symbol;Acc:HGNC:25949]	ZNF586	-0.0695072	3.60098	0.692166	0.405429	0.954361	Unchanged
ENSG00000083838	protein_coding	zinc finger protein 446 [Source:HGNC Symbol;Acc:HGNC:21036]	ZNF446	0.0320493	3.51889	0.141533	0.706762	0.987435	Unchanged
ENSG00000083844	protein_coding	zinc finger protein 264 [Source:HGNC Symbol;Acc:HGNC:13057]	ZNF264	-0.0127232	5.65742	0.0773981	0.780855	0.993101	Unchanged
ENSG00000083845	protein_coding	ribosomal protein S5 [Source:HGNC Symbol;Acc:HGNC:10426]	RPS5	0.045261	9.03927	1.31128	0.252163	0.91002	Unchanged
ENSG00000083857	protein_coding	FAT atypical cadherin 1 [Source:HGNC Symbol;Acc:HGNC:3595]	FAT1	-0.0641374	6.05588	1.21393	0.270554	0.914023	Unchanged
ENSG00000083896	protein_coding	YTH domain containing 1 [Source:HGNC Symbol;Acc:HGNC:30626]	YTHDC1	-0.032168	6.76418	0.685772	0.407606	0.954361	Unchanged
ENSG00000083937	protein_coding	charged multivesicular body protein 2B [Source:HGNC Symbol;Acc:HGNC:24537]	CHMP2B	-0.0160391	4.35666	0.0424415	0.836781	0.996176	Unchanged
ENSG00000084070	protein_coding	small ArfGAP2 [Source:HGNC Symbol;Acc:HGNC:25082]	SMAP2	0.00827621	5.14726	0.018991	0.890392	0.998208	Unchanged
ENSG00000084072	protein_coding	peptidylprolyl isomerase E [Source:HGNC Symbol;Acc:HGNC:9258]	PPIE	0.0453944	5.77772	0.867041	0.351776	0.94355	Unchanged
ENSG00000084073	protein_coding	zinc metallopeptidase STE24 [Source:HGNC Symbol;Acc:HGNC:12877]	ZMPSTE24	-0.0767969	6.21681	3.16814	0.075088	0.785993	Unchanged
ENSG00000084090	protein_coding	StAR related lipid transfer domain containing 7 [Source:HGNC Symbol;Acc:HGNC:18063]	STARD7	-0.0170701	7.7488	0.230559	0.631109	0.980546	Unchanged
ENSG00000084092	protein_coding	nitric oxide associated 1 [Source:HGNC Symbol;Acc:HGNC:28473]	NOA1	0.0234361	4.87771	0.154088	0.694659	0.986549	Unchanged
ENSG00000084093	protein_coding	RE1 silencing transcription factor [Source:HGNC Symbol;Acc:HGNC:9966]	REST	0.0294894	5.72405	0.310117	0.577608	0.980546	Unchanged
ENSG00000084110	protein_coding	histidine ammonia-lyase [Source:HGNC Symbol;Acc:HGNC:4806]	HAL	-0.255695	-0.602682	0.624778	0.429277	0.960496	Unchanged
ENSG00000084112	protein_coding	slingshot protein phosphatase 1 [Source:HGNC Symbol;Acc:HGNC:30579]	SSH1	-0.0402047	6.28	0.905679	0.341264	0.939908	Unchanged
ENSG00000084207	protein_coding	glutathione S-transferase pi 1 [Source:HGNC Symbol;Acc:HGNC:4638]	GSTP1	0.0391679	7.93369	1.04034	0.307743	0.92788	Unchanged
ENSG00000084234	protein_coding	amyloid beta precursor like protein 2 [Source:HGNC Symbol;Acc:HGNC:598]	APLP2	0.0175832	7.89295	0.239365	0.624665	0.980546	Unchanged
ENSG00000084444	protein_coding	family with sequence similarity 234 member B [Source:HGNC Symbol;Acc:HGNC:29288]	FAM234B	-0.0309633	4.96365	0.253985	0.614283	0.980546	Unchanged
ENSG00000084453	protein_coding	solute carrier organic anion transporter family member 1A2 [Source:HGNC Symbol;Acc:HGNC:10956]	SLCO1A2	-0.06078	3.53701	0.74048	0.389507	0.951351	Unchanged
ENSG00000084463	protein_coding	WW domain binding protein 11 [Source:HGNC Symbol;Acc:HGNC:16461]	WBP11	-0.00146747	7.24559	0.0014905	0.969204	0.998791	Unchanged
ENSG00000084623	protein_coding	eukaryotic translation initiation factor 3 subunit I [Source:HGNC Symbol;Acc:HGNC:3272]	EIF3I	-0.0239822	7.63261	0.360323	0.548327	0.978558	Unchanged
ENSG00000084628	protein_coding	sodium/potassium transporting ATPase interacting 1 [Source:HGNC Symbol;Acc:HGNC:25743]	NKAIN1	0.0410629	6.43254	0.56116	0.453793	0.969572	Unchanged
ENSG00000084636	protein_coding	collagen type XVI alpha 1 chain [Source:HGNC Symbol;Acc:HGNC:2193]	COL16A1	-0.0803385	2.43084	0.352496	0.552704	0.978876	Unchanged
ENSG00000084652	protein_coding	taxilin alpha [Source:HGNC Symbol;Acc:HGNC:30685]	TXLNA	-0.00964727	6.94092	0.0602254	0.80614	0.996154	Unchanged
ENSG00000084674	protein_coding	apolipoprotein B [Source:HGNC Symbol;Acc:HGNC:603]	APOB	-0.810493	-1.74981	1.11996	0.289928	0.922397	Unchanged
ENSG00000084676	protein_coding	nuclear receptor coactivator 1 [Source:HGNC Symbol;Acc:HGNC:7668]	NCOA1	-0.0338092	6.56083	0.702595	0.401913	0.954255	Unchanged
ENSG00000084693	protein_coding	ATP/GTP binding protein like 5 [Source:HGNC Symbol;Acc:HGNC:26147]	AGBL5	-0.0163439	6.57001	0.134319	0.713996	0.989229	Unchanged
ENSG00000084710	protein_coding	EFR3 homolog B [Source:HGNC Symbol;Acc:HGNC:29155]	EFR3B	-0.013964	6.84552	0.118239	0.730952	0.990209	Unchanged
ENSG00000084731	protein_coding	kinesin family member 3C [Source:HGNC Symbol;Acc:HGNC:6321]	KIF3C	-0.0392035	7.33826	1.19052	0.275225	0.915816	Unchanged
ENSG00000084733	protein_coding	RAB10, member RAS oncogene family [Source:HGNC Symbol;Acc:HGNC:9759]	RAB10	-0.0576826	7.54427	2.48715	0.114779	0.839441	Unchanged
ENSG00000084734	protein_coding	glucokinase regulator [Source:HGNC Symbol;Acc:HGNC:4196]	GCKR	-0.2507	-1.80796	0.233635	0.628841	0.980546	Unchanged
ENSG00000084754	protein_coding	hydroxyacyl-CoA dehydrogenase trifunctional multienzyme complex subunit alpha [Source:HGNC Symbol;Acc:HGNC:4801]	HADHA	-0.0185401	8.19942	0.311343	0.576857	0.980546	Unchanged
ENSG00000084764	protein_coding	microtubule associated protein RP/EB family member 3 [Source:HGNC Symbol;Acc:HGNC:6892]	MAPRE3	0.119108	4.38361	3.09247	0.0786554	0.787018	Unchanged
ENSG00000084774	protein_coding	carbamoyl-phosphate synthetase 2, aspartate transcarbamylase, and dihydroorotase [Source:HGNC Symbol;Acc:HGNC:1424]	CAD	-0.058705	7.60842	2.26126	0.132646	0.856297	Unchanged
ENSG00000085063	protein_coding	CD59 molecule (CD59 blood group) [Source:HGNC Symbol;Acc:HGNC:1689]	CD59	-0.0703802	5.25149	1.89656	0.168464	0.874432	Unchanged
ENSG00000085117	protein_coding	CD82 molecule [Source:HGNC Symbol;Acc:HGNC:6210]	CD82	-1.10336	-1.16514	5.57755	0.0181921	0.571639	Unchanged
ENSG00000085185	protein_coding	BCL6 corepressor like 1 [Source:HGNC Symbol;Acc:HGNC:25657]	BCORL1	-0.186522	5.9205	13.685	0.000216169	0.0825849	Unchanged
ENSG00000085224	protein_coding	ATRX chromatin remodeler [Source:HGNC Symbol;Acc:HGNC:886]	ATRX	0.0951873	9.06506	2.67813	0.101735	0.828616	Unchanged
ENSG00000085231	protein_coding	adenylate kinase 6 [Source:HGNC Symbol;Acc:HGNC:49151]	AK6	-0.0564984	3.87275	0.49204	0.483019	0.971147	Unchanged
ENSG00000085274	protein_coding	myoneurin [Source:HGNC Symbol;Acc:HGNC:14955]	MYNN	-0.0178752	5.18597	0.108259	0.742136	0.990714	Unchanged
ENSG00000085276	protein_coding	MDS1 and EVI1 complex locus [Source:HGNC Symbol;Acc:HGNC:3498]	MECOM	-0.215922	0.165095	0.655232	0.418248	0.95664	Unchanged
ENSG00000085365	protein_coding	secretory carrier membrane protein 1 [Source:HGNC Symbol;Acc:HGNC:10563]	SCAMP1	-0.0338029	6.88014	0.655103	0.418294	0.95664	Unchanged
ENSG00000085377	protein_coding	prolyl endopeptidase [Source:HGNC Symbol;Acc:HGNC:9358]	PREP	-0.102702	6.34331	4.66992	0.0306954	0.647442	Unchanged
ENSG00000085382	protein_coding	HECT domain and ankyrin repeat containing E3 ubiquitin protein ligase 1 [Source:HGNC Symbol;Acc:HGNC:21033]	HACE1	-0.0343867	5.54861	0.493956	0.482168	0.970526	Unchanged
ENSG00000085415	protein_coding	SEH1 like nucleoporin [Source:HGNC Symbol;Acc:HGNC:30379]	SEH1L	0.0653861	6.56243	1.94366	0.163272	0.871237	Unchanged
ENSG00000085433	protein_coding	WD repeat domain 47 [Source:HGNC Symbol;Acc:HGNC:29141]	WDR47	-0.0685832	5.64001	1.8893	0.169281	0.874875	Unchanged
ENSG00000085449	protein_coding	WD repeat and FYVE domain containing 1 [Source:HGNC Symbol;Acc:HGNC:20451]	WDFY1	-0.00744259	5.18142	0.0172332	0.895558	0.998208	Unchanged
ENSG00000085465	protein_coding	oviductal glycoprotein 1 [Source:HGNC Symbol;Acc:HGNC:8524]	OVGP1	0.602319	-0.277844	3.42926	0.0640509	0.772585	Unchanged
ENSG00000085491	protein_coding	solute carrier family 25 member 24 [Source:HGNC Symbol;Acc:HGNC:20662]	SLC25A24	-0.0298574	6.29976	0.587008	0.443579	0.966311	Unchanged
ENSG00000085511	protein_coding	mitogen-activated protein kinase kinase kinase 4 [Source:HGNC Symbol;Acc:HGNC:6856]	MAP3K4	-0.00219155	5.83158	0.00202107	0.964142	0.998791	Unchanged
ENSG00000085514	protein_coding	paired immunoglobin like type 2 receptor alpha [Source:HGNC Symbol;Acc:HGNC:20396]	PILRA	0.129294	0.959122	0.307068	0.579485	0.980546	Unchanged
ENSG00000085552	protein_coding	immunoglobulin superfamily member 9 [Source:HGNC Symbol;Acc:HGNC:18132]	IGSF9	-0.0338441	5.95749	0.591375	0.441888	0.965512	Unchanged
ENSG00000085563	protein_coding	ATP binding cassette subfamily B member 1 [Source:HGNC Symbol;Acc:HGNC:40]	ABCB1	-0.0570519	7.26513	2.09653	0.147634	0.864353	Unchanged
ENSG00000085644	protein_coding	zinc finger protein 213 [Source:HGNC Symbol;Acc:HGNC:13005]	ZNF213	-0.0749406	4.67038	1.13745	0.286191	0.920834	Unchanged
ENSG00000085662	protein_coding	aldo-keto reductase family 1 member B [Source:HGNC Symbol;Acc:HGNC:381]	AKR1B1	0.0249318	7.46353	0.289455	0.59057	0.980546	Unchanged
ENSG00000085719	protein_coding	copine 3 [Source:HGNC Symbol;Acc:HGNC:2316]	CPNE3	-0.0443914	6.89273	1.21021	0.27129	0.914023	Unchanged
ENSG00000085721	protein_coding	RRN3 homolog, RNA polymerase I transcription factor [Source:HGNC Symbol;Acc:HGNC:30346]	RRN3	0.0522285	6.38455	1.47724	0.224208	0.901346	Unchanged
ENSG00000085733	protein_coding	cortactin [Source:HGNC Symbol;Acc:HGNC:3338]	CTTN	0.0171708	7.57676	0.223973	0.63603	0.981188	Unchanged
ENSG00000085760	protein_coding	mitochondrial translational initiation factor 2 [Source:HGNC Symbol;Acc:HGNC:7441]	MTIF2	0.0356031	5.59344	0.359607	0.548725	0.978558	Unchanged
ENSG00000085788	protein_coding	DDHD domain containing 2 [Source:HGNC Symbol;Acc:HGNC:29106]	DDHD2	0.0254804	6.6438	0.386432	0.534181	0.975718	Unchanged
ENSG00000085831	protein_coding	tetratricopeptide repeat domain 39A [Source:HGNC Symbol;Acc:HGNC:18657]	TTC39A	-0.141114	0.913108	0.433523	0.510265	0.973159	Unchanged
ENSG00000085832	protein_coding	epidermal growth factor receptor pathway substrate 15 [Source:HGNC Symbol;Acc:HGNC:3419]	EPS15	0.0121484	6.7237	0.0857221	0.769688	0.992936	Unchanged
ENSG00000085840	protein_coding	origin recognition complex subunit 1 [Source:HGNC Symbol;Acc:HGNC:8487]	ORC1	0.0936722	5.55739	3.54729	0.0596427	0.758663	Unchanged
ENSG00000085871	protein_coding	microsomal glutathione S-transferase 2 [Source:HGNC Symbol;Acc:HGNC:7063]	MGST2	-0.000674142	1.95209	2.0225e-05	0.996412	0.999523	Unchanged
ENSG00000085872	protein_coding	calcium homeostasis endoplasmic reticulum protein [Source:HGNC Symbol;Acc:HGNC:16930]	CHERP	0.0141878	7.00085	0.116558	0.732798	0.990209	Unchanged
ENSG00000085978	protein_coding	autophagy related 16 like 1 [Source:HGNC Symbol;Acc:HGNC:21498]	ATG16L1	0.0475028	5.24822	0.784155	0.375873	0.948036	Unchanged
ENSG00000085982	protein_coding	ubiquitin specific peptidase 40 [Source:HGNC Symbol;Acc:HGNC:20069]	USP40	-0.0451256	5.36796	0.912404	0.339477	0.93918	Unchanged
ENSG00000085998	protein_coding	protein O-linked mannose N-acetylglucosaminyltransferase 1 (beta 1,2-) [Source:HGNC Symbol;Acc:HGNC:19139]	POMGNT1	0.0433425	6.16198	1.09833	0.294632	0.923628	Unchanged
ENSG00000085999	protein_coding	RAD54 like [Source:HGNC Symbol;Acc:HGNC:9826]	RAD54L	0.00435373	5.77164	0.00868735	0.92574	0.998208	Unchanged
ENSG00000086015	protein_coding	microtubule associated serine/threonine kinase 2 [Source:HGNC Symbol;Acc:HGNC:19035]	MAST2	0.0288024	6.61328	0.514185	0.473333	0.969572	Unchanged
ENSG00000086061	protein_coding	DnaJ heat shock protein family (Hsp40) member A1 [Source:HGNC Symbol;Acc:HGNC:5229]	DNAJA1	-0.0686352	8.65891	3.8866	0.0486728	0.716377	Unchanged
ENSG00000086062	protein_coding	beta-1,4-galactosyltransferase 1 [Source:HGNC Symbol;Acc:HGNC:924]	B4GALT1	0.0585248	4.1399	0.594946	0.440513	0.965512	Unchanged
ENSG00000086065	protein_coding	charged multivesicular body protein 5 [Source:HGNC Symbol;Acc:HGNC:26942]	CHMP5	0.0463496	6.22252	1.2768	0.258495	0.912292	Unchanged
ENSG00000086102	protein_coding	nuclear transcription factor, X-box binding 1 [Source:HGNC Symbol;Acc:HGNC:7803]	NFX1	0.0135986	6.24594	0.113925	0.735719	0.990209	Unchanged
ENSG00000086189	protein_coding	DIMT1 rRNA methyltransferase and ribosome maturation factor [Source:HGNC Symbol;Acc:HGNC:30217]	DIMT1	0.0283166	4.79777	0.225665	0.634757	0.980546	Unchanged
ENSG00000086200	protein_coding	importin 11 [Source:HGNC Symbol;Acc:HGNC:20628]	IPO11	0.0185115	5.63388	0.140345	0.707938	0.987504	Unchanged
ENSG00000086232	protein_coding	eukaryotic translation initiation factor 2 alpha kinase 1 [Source:HGNC Symbol;Acc:HGNC:24921]	EIF2AK1	0.0141968	8.56313	0.190281	0.662683	0.983802	Unchanged
ENSG00000086289	protein_coding	ependymin related 1 [Source:HGNC Symbol;Acc:HGNC:17572]	EPDR1	0.0382081	5.06341	0.464291	0.495625	0.972467	Unchanged
ENSG00000086300	protein_coding	sorting nexin 10 [Source:HGNC Symbol;Acc:HGNC:14974]	SNX10	-0.0722332	2.37736	0.340051	0.5598	0.979603	Unchanged
ENSG00000086475	protein_coding	selenophosphate synthetase 1 [Source:HGNC Symbol;Acc:HGNC:19685]	SEPHS1	0.0434319	7.0419	1.17004	0.279394	0.918563	Unchanged
ENSG00000086504	protein_coding	mitochondrial ribosomal protein L28 [Source:HGNC Symbol;Acc:HGNC:14484]	MRPL28	-0.03145	5.51068	0.287386	0.5919	0.980546	Unchanged
ENSG00000086506	protein_coding	hemoglobin subunit theta 1 [Source:HGNC Symbol;Acc:HGNC:4833]	HBQ1	0.216421	-0.695053	0.401286	0.526426	0.97327	Unchanged
ENSG00000086544	protein_coding	inositol-trisphosphate 3-kinase C [Source:HGNC Symbol;Acc:HGNC:14897]	ITPKC	0.0728931	3.14346	0.626294	0.428718	0.960241	Unchanged
ENSG00000086589	protein_coding	RNA binding motif protein 22 [Source:HGNC Symbol;Acc:HGNC:25503]	RBM22	0.00342491	5.98863	0.00589502	0.938799	0.998208	Unchanged
ENSG00000086598	protein_coding	transmembrane p24 trafficking protein 2 [Source:HGNC Symbol;Acc:HGNC:16996]	TMED2	0.00609352	7.69916	0.0197713	0.888178	0.998208	Unchanged
ENSG00000086619	protein_coding	endoplasmic reticulum oxidoreductase 1 beta [Source:HGNC Symbol;Acc:HGNC:14355]	ERO1B	-0.146198	2.9301	1.60528	0.205157	0.894806	Unchanged
ENSG00000086666	protein_coding	zinc finger AN1-type containing 6 [Source:HGNC Symbol;Acc:HGNC:30164]	ZFAND6	-0.053061	5.75269	1.45185	0.228231	0.901346	Unchanged
ENSG00000086712	protein_coding	taxilin gamma [Source:HGNC Symbol;Acc:HGNC:18578]	TXLNG	-0.0561781	6.06692	1.35192	0.244943	0.906959	Unchanged
ENSG00000086717	protein_coding	protein phosphatase with EF-hand domain 1 [Source:HGNC Symbol;Acc:HGNC:9243]	PPEF1	0.0045055	4.90581	0.00559807	0.940358	0.998208	Unchanged
ENSG00000086730	protein_coding	linker for activation of T cells family member 2 [Source:HGNC Symbol;Acc:HGNC:12749]	LAT2	0.0574094	-0.445548	0.0345171	0.852611	0.998208	Unchanged
ENSG00000086758	protein_coding	HECT, UBA and WWE domain containing E3 ubiquitin protein ligase 1 [Source:HGNC Symbol;Acc:HGNC:30892]	HUWE1	-0.072639	9.29745	5.93691	0.014827	0.54099	Unchanged
ENSG00000086827	protein_coding	zw10 kinetochore protein [Source:HGNC Symbol;Acc:HGNC:13194]	ZW10	-0.0767579	5.19696	1.99009	0.158331	0.871155	Unchanged
ENSG00000086848	protein_coding	ALG9 alpha-1,2-mannosyltransferase [Source:HGNC Symbol;Acc:HGNC:15672]	ALG9	0.125498	4.35582	3.31227	0.0687644	0.782228	Unchanged
ENSG00000086991	protein_coding	NADPH oxidase 4 [Source:HGNC Symbol;Acc:HGNC:7891]	NOX4	0.130715	2.38023	1.02025	0.31246	0.93049	Unchanged
ENSG00000087008	protein_coding	acyl-CoA oxidase 3, pristanoyl [Source:HGNC Symbol;Acc:HGNC:121]	ACOX3	0.0832381	3.81482	0.75611	0.384549	0.948794	Unchanged
ENSG00000087053	protein_coding	myotubularin related protein 2 [Source:HGNC Symbol;Acc:HGNC:7450]	MTMR2	-0.0139163	6.90055	0.135459	0.712837	0.988739	Unchanged
ENSG00000087074	protein_coding	protein phosphatase 1 regulatory subunit 15A [Source:HGNC Symbol;Acc:HGNC:14375]	PPP1R15A	0.135276	4.03697	3.78641	0.0516705	0.726576	Unchanged
ENSG00000087076	protein_coding	hydroxysteroid 17-beta dehydrogenase 14 [Source:HGNC Symbol;Acc:HGNC:23238]	HSD17B14	0.202052	1.87517	1.90915	0.167057	0.873341	Unchanged
ENSG00000087077	protein_coding	thyroid hormone receptor interactor 6 [Source:HGNC Symbol;Acc:HGNC:12311]	TRIP6	-0.157567	0.782494	0.4655	0.495065	0.972467	Unchanged
ENSG00000087085	protein_coding	acetylcholinesterase (Cartwright blood group) [Source:HGNC Symbol;Acc:HGNC:108]	ACHE	0.0759082	2.03943	0.235694	0.627334	0.980546	Unchanged
ENSG00000087086	protein_coding	ferritin light chain [Source:HGNC Symbol;Acc:HGNC:3999]	FTL	0.0622818	7.74763	2.7058	0.099984	0.825821	Unchanged
ENSG00000087087	protein_coding	serrate, RNA effector molecule [Source:HGNC Symbol;Acc:HGNC:24101]	SRRT	0.00583119	7.6632	0.0222284	0.881481	0.998208	Unchanged
ENSG00000087088	protein_coding	BCL2 associated X, apoptosis regulator [Source:HGNC Symbol;Acc:HGNC:959]	BAX	0.00244511	4.97235	0.00188678	0.965353	0.998791	Unchanged
ENSG00000087095	protein_coding	nemo like kinase [Source:HGNC Symbol;Acc:HGNC:29858]	NLK	0.0534409	4.43193	0.60085	0.438254	0.964978	Unchanged
ENSG00000087111	protein_coding	phosphatidylinositol glycan anchor biosynthesis class S [Source:HGNC Symbol;Acc:HGNC:14937]	PIGS	0.0612663	5.72379	1.65244	0.198627	0.89065	Unchanged
ENSG00000087116	protein_coding	ADAM metallopeptidase with thrombospondin type 1 motif 2 [Source:HGNC Symbol;Acc:HGNC:218]	ADAMTS2	0.00785943	4.23176	0.00742315	0.931341	0.998208	Unchanged
ENSG00000087152	protein_coding	ataxin 7 like 3 [Source:HGNC Symbol;Acc:HGNC:25416]	ATXN7L3	0.000641435	6.51394	0.0001786	0.989337	0.999523	Unchanged
ENSG00000087157	protein_coding	phosphatidylglycerophosphate synthase 1 [Source:HGNC Symbol;Acc:HGNC:30029]	PGS1	0.0603719	5.85128	1.57657	0.209255	0.896941	Unchanged
ENSG00000087191	protein_coding	proteasome 26S subunit, ATPase 5 [Source:HGNC Symbol;Acc:HGNC:9552]	PSMC5	0.00517253	7.59549	0.01965	0.888519	0.998208	Unchanged
ENSG00000087206	protein_coding	ubiquitin interaction motif containing 1 [Source:HGNC Symbol;Acc:HGNC:30298]	UIMC1	-0.0562285	5.01956	0.963973	0.326188	0.933855	Unchanged
ENSG00000087245	protein_coding	matrix metallopeptidase 2 [Source:HGNC Symbol;Acc:HGNC:7166]	MMP2	-0.000814733	8.10678	0.000361869	0.984823	0.999523	Unchanged
ENSG00000087253	protein_coding	lysophosphatidylcholine acyltransferase 2 [Source:HGNC Symbol;Acc:HGNC:26032]	LPCAT2	-0.0207164	4.95689	0.108286	0.742104	0.990714	Unchanged
ENSG00000087258	protein_coding	G protein subunit alpha o1 [Source:HGNC Symbol;Acc:HGNC:4389]	GNAO1	-0.0492627	7.19726	1.62153	0.202879	0.893102	Unchanged
ENSG00000087263	protein_coding	2-oxoglutarate and iron dependent oxygenase domain containing 1 [Source:HGNC Symbol;Acc:HGNC:25585]	OGFOD1	5.86483e-05	6.07167	1.81481e-06	0.998925	0.999523	Unchanged
ENSG00000087266	protein_coding	SH3 domain binding protein 2 [Source:HGNC Symbol;Acc:HGNC:10825]	SH3BP2	0.136241	6.14358	8.43825	0.0036741	0.347506	Unchanged
ENSG00000087269	protein_coding	NOP14 nucleolar protein [Source:HGNC Symbol;Acc:HGNC:16821]	NOP14	0.0441084	6.11427	0.826011	0.363428	0.945863	Unchanged
ENSG00000087274	protein_coding	adducin 1 [Source:HGNC Symbol;Acc:HGNC:243]	ADD1	0.00268689	7.99058	0.00636581	0.936407	0.998208	Unchanged
ENSG00000087299	protein_coding	L-2-hydroxyglutarate dehydrogenase [Source:HGNC Symbol;Acc:HGNC:20499]	L2HGDH	0.000561949	4.73562	8.25481e-05	0.992751	0.999523	Unchanged
ENSG00000087301	protein_coding	thioredoxin domain containing 16 [Source:HGNC Symbol;Acc:HGNC:19965]	TXNDC16	0.0504596	4.83831	0.740816	0.3894	0.951351	Unchanged
ENSG00000087302	protein_coding	RNA transcription, translation and transport factor [Source:HGNC Symbol;Acc:HGNC:23169]	RTRAF	-0.00990589	6.70278	0.0672355	0.795405	0.994515	Unchanged
ENSG00000087303	protein_coding	nidogen 2 [Source:HGNC Symbol;Acc:HGNC:13389]	NID2	-0.0678765	-0.367721	0.0467623	0.828796	0.996176	Unchanged
ENSG00000087338	protein_coding	germ cell-less 1, spermatogenesis associated [Source:HGNC Symbol;Acc:HGNC:23843]	GMCL1	-0.0474376	6.21557	1.32748	0.249254	0.907936	Unchanged
ENSG00000087365	protein_coding	splicing factor 3b subunit 2 [Source:HGNC Symbol;Acc:HGNC:10769]	SF3B2	-0.0120573	8.52645	0.145821	0.702561	0.987273	Unchanged
ENSG00000087448	protein_coding	kelch like family member 42 [Source:HGNC Symbol;Acc:HGNC:29252]	KLHL42	-0.0478546	7.0503	1.67095	0.196131	0.889323	Unchanged
ENSG00000087460	protein_coding	GNAS complex locus [Source:HGNC Symbol;Acc:HGNC:4392]	GNAS	-0.0194252	10.7886	0.328037	0.566817	0.980269	Unchanged
ENSG00000087470	protein_coding	dynamin 1 like [Source:HGNC Symbol;Acc:HGNC:2973]	DNM1L	-0.032796	7.53085	0.883455	0.347257	0.942994	Unchanged
ENSG00000087494	protein_coding	parathyroid hormone like hormone [Source:HGNC Symbol;Acc:HGNC:9607]	PTHLH	1.19905	-1.70819	2.48412	0.115001	0.840465	Unchanged
ENSG00000087495	protein_coding	phosphatase and actin regulator 3 [Source:HGNC Symbol;Acc:HGNC:15833]	PHACTR3	-0.0168088	5.20202	0.10838	0.741996	0.990714	Unchanged
ENSG00000087502	protein_coding	ERGIC and golgi 2 [Source:HGNC Symbol;Acc:HGNC:30208]	ERGIC2	0.0665599	5.00075	1.30706	0.252927	0.91002	Unchanged
ENSG00000087586	protein_coding	aurora kinase A [Source:HGNC Symbol;Acc:HGNC:11393]	AURKA	0.0294777	5.51539	0.348971	0.554696	0.979393	Unchanged
ENSG00000087842	protein_coding	pirin [Source:HGNC Symbol;Acc:HGNC:30048]	PIR	0.0156526	4.53552	0.0524495	0.818854	0.996176	Unchanged
ENSG00000087884	protein_coding	adipogenesis associated Mth938 domain containing [Source:HGNC Symbol;Acc:HGNC:30205]	AAMDC	0.128601	2.9032	1.68378	0.194422	0.887565	Unchanged
ENSG00000087903	protein_coding	regulatory factor X2 [Source:HGNC Symbol;Acc:HGNC:9983]	RFX2	0.0561984	3.92761	0.594151	0.440819	0.965512	Unchanged
ENSG00000087995	protein_coding	methyltransferase like 2A [Source:HGNC Symbol;Acc:HGNC:25755]	METTL2A	-0.0248919	6.10112	0.318963	0.572232	0.980546	Unchanged
ENSG00000088035	protein_coding	ALG6 alpha-1,3-glucosyltransferase [Source:HGNC Symbol;Acc:HGNC:23157]	ALG6	-0.0577478	4.10625	0.610048	0.43477	0.964044	Unchanged
ENSG00000088038	protein_coding	CCR4-NOT transcription complex subunit 3 [Source:HGNC Symbol;Acc:HGNC:7879]	CNOT3	0.013427	5.93124	0.0763886	0.782253	0.993101	Unchanged
ENSG00000088179	protein_coding	protein tyrosine phosphatase non-receptor type 4 [Source:HGNC Symbol;Acc:HGNC:9656]	PTPN4	-0.0239377	6.27298	0.227293	0.633538	0.980546	Unchanged
ENSG00000088205	protein_coding	DEAD-box helicase 18 [Source:HGNC Symbol;Acc:HGNC:2741]	DDX18	0.0111259	7.81019	0.0948506	0.758099	0.992476	Unchanged
ENSG00000088247	protein_coding	KH-type splicing regulatory protein [Source:HGNC Symbol;Acc:HGNC:6316]	KHSRP	0.0201416	8.52018	0.309773	0.577819	0.980546	Unchanged
ENSG00000088256	protein_coding	G protein subunit alpha 11 [Source:HGNC Symbol;Acc:HGNC:4379]	GNA11	-0.0725081	6.42342	2.14087	0.14342	0.864353	Unchanged
ENSG00000088280	protein_coding	ArfGAP with SH3 domain, ankyrin repeat and PH domain 3 [Source:HGNC Symbol;Acc:HGNC:14987]	ASAP3	-0.00512706	4.84804	0.00789025	0.929219	0.998208	Unchanged
ENSG00000088298	protein_coding	ER degradation enhancing alpha-mannosidase like protein 2 [Source:HGNC Symbol;Acc:HGNC:15877]	EDEM2	-0.0342235	3.53355	0.139554	0.708724	0.987631	Unchanged
ENSG00000088305	protein_coding	DNA methyltransferase 3 beta [Source:HGNC Symbol;Acc:HGNC:2979]	DNMT3B	-0.116383	4.61028	3.53928	0.0599314	0.758663	Unchanged
ENSG00000088325	protein_coding	TPX2 microtubule nucleation factor [Source:HGNC Symbol;Acc:HGNC:1249]	TPX2	-0.048609	7.99416	2.16273	0.141394	0.864353	Unchanged
ENSG00000088340	transcribed_unitary_pseudogene	fer-1 like family member 4 (pseudogene) [Source:HGNC Symbol;Acc:HGNC:15801]	FER1L4	0.200944	0.826733	1.02639	0.311008	0.930419	Unchanged
ENSG00000088356	protein_coding	p53 and DNA damage regulated 1 [Source:HGNC Symbol;Acc:HGNC:16119]	PDRG1	0.0641265	3.93776	0.712696	0.39855	0.953136	Unchanged
ENSG00000088367	protein_coding	erythrocyte membrane protein band 4.1 like 1 [Source:HGNC Symbol;Acc:HGNC:3378]	EPB41L1	-0.0210242	6.57175	0.283435	0.594458	0.980546	Unchanged
ENSG00000088387	protein_coding	dedicator of cytokinesis 9 [Source:HGNC Symbol;Acc:HGNC:14132]	DOCK9	-0.00355901	4.29181	0.00278655	0.957901	0.998791	Unchanged
ENSG00000088448	protein_coding	ankyrin repeat domain 10 [Source:HGNC Symbol;Acc:HGNC:20265]	ANKRD10	-0.0146945	7.00371	0.13703	0.711252	0.98813	Unchanged
ENSG00000088451	protein_coding	TDP-glucose 4,6-dehydratase [Source:HGNC Symbol;Acc:HGNC:20324]	TGDS	-0.070329	3.59879	0.635661	0.425286	0.959323	Unchanged
ENSG00000088543	protein_coding	chromosome 3 open reading frame 18 [Source:HGNC Symbol;Acc:HGNC:24837]	C3orf18	-0.148746	4.09803	4.16114	0.0413616	0.68528	Unchanged
ENSG00000088682	protein_coding	coenzyme Q9 [Source:HGNC Symbol;Acc:HGNC:25302]	COQ9	-0.0161096	5.33564	0.0914438	0.76235	0.992613	Unchanged
ENSG00000088727	protein_coding	kinesin family member 9 [Source:HGNC Symbol;Acc:HGNC:16666]	KIF9	-0.13622	3.04087	1.81575	0.17782	0.879851	Unchanged
ENSG00000088756	protein_coding	Rho GTPase activating protein 28 [Source:HGNC Symbol;Acc:HGNC:25509]	ARHGAP28	0.011617	3.49705	0.0180899	0.893008	0.998208	Unchanged
ENSG00000088766	protein_coding	cardiolipin synthase 1 [Source:HGNC Symbol;Acc:HGNC:16148]	CRLS1	0.382448	1.66619	4.31121	0.0378621	0.677392	Unchanged
ENSG00000088808	protein_coding	protein phosphatase 1 regulatory subunit 13B [Source:HGNC Symbol;Acc:HGNC:14950]	PPP1R13B	0.0530963	4.16791	0.481051	0.487947	0.971573	Unchanged
ENSG00000088812	protein_coding	attractin [Source:HGNC Symbol;Acc:HGNC:885]	ATRN	-0.000133471	6.87718	1.19753e-05	0.997239	0.999523	Unchanged
ENSG00000088826	protein_coding	spermine oxidase [Source:HGNC Symbol;Acc:HGNC:15862]	SMOX	0.0357232	2.24059	0.0735897	0.78618	0.993101	Unchanged
ENSG00000088832	protein_coding	FKBP prolyl isomerase 1A [Source:HGNC Symbol;Acc:HGNC:3711]	FKBP1A	0.0547876	6.64959	1.83522	0.175512	0.87779	Unchanged
ENSG00000088833	protein_coding	NSFL1 cofactor [Source:HGNC Symbol;Acc:HGNC:15912]	NSFL1C	0.0298609	5.95724	0.453528	0.500664	0.972467	Unchanged
ENSG00000088836	protein_coding	solute carrier family 4 member 11 [Source:HGNC Symbol;Acc:HGNC:16438]	SLC4A11	-0.0225256	1.7973	0.0184859	0.891851	0.998208	Unchanged
ENSG00000088854	protein_coding	chromosome 20 open reading frame 194 [Source:HGNC Symbol;Acc:HGNC:17721]	C20orf194	-0.0625839	5.50439	1.66524	0.196897	0.89065	Unchanged
ENSG00000088876	protein_coding	zinc finger protein 343 [Source:HGNC Symbol;Acc:HGNC:16017]	ZNF343	-0.0932022	4.90707	2.28732	0.130435	0.855003	Unchanged
ENSG00000088881	protein_coding	EBF family member 4 [Source:HGNC Symbol;Acc:HGNC:29278]	EBF4	-0.0628624	5.559	1.15377	0.282761	0.918563	Unchanged
ENSG00000088882	protein_coding	carboxypeptidase X, M14 family member 1 [Source:HGNC Symbol;Acc:HGNC:15771]	CPXM1	-0.00110552	6.9541	0.000706084	0.978801	0.999244	Unchanged
ENSG00000088888	protein_coding	mitochondrial antiviral signaling protein [Source:HGNC Symbol;Acc:HGNC:29233]	MAVS	0.027942	6.97146	0.512378	0.474111	0.969572	Unchanged
ENSG00000088899	protein_coding	leucine zipper tumor suppressor family member 3 [Source:HGNC Symbol;Acc:HGNC:30139]	LZTS3	0.100189	4.6062	2.30919	0.128611	0.853326	Unchanged
ENSG00000088930	protein_coding	5'-3' exoribonuclease 2 [Source:HGNC Symbol;Acc:HGNC:12836]	XRN2	0.017529	7.93582	0.254204	0.61413	0.980546	Unchanged
ENSG00000088970	protein_coding	kizuna centrosomal protein [Source:HGNC Symbol;Acc:HGNC:15865]	KIZ	-0.0157481	4.18761	0.0477823	0.826968	0.996176	Unchanged
ENSG00000088986	protein_coding	dynein light chain LC8-type 1 [Source:HGNC Symbol;Acc:HGNC:15476]	DYNLL1	-0.0518927	7.26838	1.99961	0.157339	0.870946	Unchanged
ENSG00000088992	protein_coding	tescalcin [Source:HGNC Symbol;Acc:HGNC:26065]	TESC	-0.534146	-1.31386	1.06302	0.302527	0.925788	Unchanged
ENSG00000089006	protein_coding	sorting nexin 5 [Source:HGNC Symbol;Acc:HGNC:14969]	SNX5	0.158428	6.25895	12.9868	0.000313689	0.103592	Unchanged
ENSG00000089009	protein_coding	ribosomal protein L6 [Source:HGNC Symbol;Acc:HGNC:10362]	RPL6	0.0228878	9.42352	0.502054	0.478599	0.969599	Unchanged
ENSG00000089022	protein_coding	MAPK activated protein kinase 5 [Source:HGNC Symbol;Acc:HGNC:6889]	MAPKAPK5	0.0239079	6.37647	0.318582	0.572461	0.980546	Unchanged
ENSG00000089041	protein_coding	purinergic receptor P2X 7 [Source:HGNC Symbol;Acc:HGNC:8537]	P2RX7	-0.127289	3.80829	2.95351	0.0856914	0.801844	Unchanged
ENSG00000089048	protein_coding	ESF1 nucleolar pre-rRNA processing protein homolog [Source:HGNC Symbol;Acc:HGNC:15898]	ESF1	0.067913	5.64596	0.970975	0.324437	0.933855	Unchanged
ENSG00000089050	protein_coding	RB binding protein 9, serine hydrolase [Source:HGNC Symbol;Acc:HGNC:9892]	RBBP9	0.0395297	5.95414	0.955728	0.328265	0.933855	Unchanged
ENSG00000089053	protein_coding	anaphase promoting complex subunit 5 [Source:HGNC Symbol;Acc:HGNC:15713]	ANAPC5	0.0598939	7.22552	2.12322	0.145081	0.864353	Unchanged
ENSG00000089057	protein_coding	solute carrier family 23 member 2 [Source:HGNC Symbol;Acc:HGNC:10973]	SLC23A2	-0.0216301	5.73803	0.194148	0.659487	0.983802	Unchanged
ENSG00000089060	protein_coding	solute carrier family 8 member B1 [Source:HGNC Symbol;Acc:HGNC:26175]	SLC8B1	0.172625	2.73818	2.42297	0.119568	0.845918	Unchanged
ENSG00000089063	protein_coding	transmembrane protein 230 [Source:HGNC Symbol;Acc:HGNC:15876]	TMEM230	0.0565838	6.39688	1.89155	0.169027	0.874432	Unchanged
ENSG00000089091	protein_coding	double zinc ribbon and ankyrin repeat domains 1 [Source:HGNC Symbol;Acc:HGNC:15858]	DZANK1	0.0722109	3.94041	0.756717	0.384358	0.948794	Unchanged
ENSG00000089094	protein_coding	lysine demethylase 2B [Source:HGNC Symbol;Acc:HGNC:13610]	KDM2B	-0.057485	6.01826	1.41311	0.23454	0.90543	Unchanged
ENSG00000089101	protein_coding	cilia and flagella associated protein 61 [Source:HGNC Symbol;Acc:HGNC:15872]	CFAP61	0.437659	-1.01348	0.701482	0.402286	0.954255	Unchanged
ENSG00000089123	protein_coding	taspase 1 [Source:HGNC Symbol;Acc:HGNC:15859]	TASP1	0.0663206	3.46847	0.493165	0.482519	0.970617	Unchanged
ENSG00000089127	protein_coding	2'-5'-oligoadenylate synthetase 1 [Source:HGNC Symbol;Acc:HGNC:8086]	OAS1	-0.258013	1.94814	3.20723	0.0733137	0.782824	Unchanged
ENSG00000089154	protein_coding	GCN1 activator of EIF2AK4 [Source:HGNC Symbol;Acc:HGNC:4199]	GCN1	-0.0158689	8.36786	0.216596	0.641646	0.981811	Unchanged
ENSG00000089157	protein_coding	ribosomal protein lateral stalk subunit P0 [Source:HGNC Symbol;Acc:HGNC:10371]	RPLP0	0.0246163	9.73064	0.484262	0.486498	0.971573	Unchanged
ENSG00000089159	protein_coding	paxillin [Source:HGNC Symbol;Acc:HGNC:9718]	PXN	-0.00174266	4.96442	0.000838302	0.976902	0.998791	Unchanged
ENSG00000089163	protein_coding	sirtuin 4 [Source:HGNC Symbol;Acc:HGNC:14932]	SIRT4	-0.170627	0.256967	0.405156	0.524438	0.97327	Unchanged
ENSG00000089169	protein_coding	rabphilin 3A [Source:HGNC Symbol;Acc:HGNC:17056]	RPH3A	-0.0129733	7.52535	0.12634	0.722257	0.990125	Unchanged
ENSG00000089177	protein_coding	kinesin family member 16B [Source:HGNC Symbol;Acc:HGNC:15869]	KIF16B	0.0809324	4.44545	1.54235	0.214268	0.900706	Unchanged
ENSG00000089195	protein_coding	tRNA methyltransferase 6 [Source:HGNC Symbol;Acc:HGNC:20900]	TRMT6	0.0709012	5.97999	2.20451	0.137608	0.863426	Unchanged
ENSG00000089199	protein_coding	chromogranin B [Source:HGNC Symbol;Acc:HGNC:1930]	CHGB	0.0431989	7.21916	1.10634	0.292879	0.922962	Unchanged
ENSG00000089220	protein_coding	phosphatidylethanolamine binding protein 1 [Source:HGNC Symbol;Acc:HGNC:8630]	PEBP1	0.0176164	7.62152	0.276692	0.598878	0.980546	Unchanged
ENSG00000089234	protein_coding	BRCA1 associated protein [Source:HGNC Symbol;Acc:HGNC:1099]	BRAP	-0.0144327	5.27839	0.0889775	0.765481	0.992655	Unchanged
ENSG00000089248	protein_coding	endoplasmic reticulum protein 29 [Source:HGNC Symbol;Acc:HGNC:13799]	ERP29	-0.0230755	6.17319	0.266209	0.605886	0.980546	Unchanged
ENSG00000089250	protein_coding	nitric oxide synthase 1 [Source:HGNC Symbol;Acc:HGNC:7872]	NOS1	-0.141574	2.40366	1.44602	0.229168	0.902589	Unchanged
ENSG00000089280	protein_coding	FUS RNA binding protein [Source:HGNC Symbol;Acc:HGNC:4010]	FUS	0.0278754	9.44152	0.664234	0.415069	0.95664	Unchanged
ENSG00000089289	protein_coding	immunoglobulin binding protein 1 [Source:HGNC Symbol;Acc:HGNC:5461]	IGBP1	-0.016701	4.93949	0.103546	0.747615	0.991352	Unchanged
ENSG00000089335	protein_coding	zinc finger protein 302 [Source:HGNC Symbol;Acc:HGNC:13848]	ZNF302	0.05248	6.12323	1.19717	0.273888	0.914308	Unchanged
ENSG00000089351	protein_coding	GRAM domain containing 1A [Source:HGNC Symbol;Acc:HGNC:29305]	GRAMD1A	0.0551981	6.33645	1.43952	0.230218	0.903254	Unchanged
ENSG00000089486	protein_coding	cell death inducing p53 target 1 [Source:HGNC Symbol;Acc:HGNC:13234]	CDIP1	-0.160036	4.86778	5.25695	0.0218593	0.600715	Unchanged
ENSG00000089505	protein_coding	CKLF like MARVEL transmembrane domain containing 1 [Source:HGNC Symbol;Acc:HGNC:19172]	CMTM1	-0.0281902	2.3683	0.040045	0.841393	0.996482	Unchanged
ENSG00000089558	protein_coding	potassium voltage-gated channel subfamily H member 4 [Source:HGNC Symbol;Acc:HGNC:6253]	KCNH4	-0.138296	3.4319	2.29567	0.129735	0.855003	Unchanged
ENSG00000089597	protein_coding	glucosidase II alpha subunit [Source:HGNC Symbol;Acc:HGNC:4138]	GANAB	-0.0117703	8.42893	0.0994028	0.752547	0.992067	Unchanged
ENSG00000089639	protein_coding	GEM interacting protein [Source:HGNC Symbol;Acc:HGNC:24852]	GMIP	-0.0532656	4.19511	0.593316	0.44114	0.965512	Unchanged
ENSG00000089682	protein_coding	RNA binding motif protein 41 [Source:HGNC Symbol;Acc:HGNC:25617]	RBM41	0.0717533	5.4182	1.63831	0.200558	0.89087	Unchanged
ENSG00000089685	protein_coding	baculoviral IAP repeat containing 5 [Source:HGNC Symbol;Acc:HGNC:593]	BIRC5	0.00371394	7.39415	0.00720785	0.932342	0.998208	Unchanged
ENSG00000089692	protein_coding	lymphocyte activating 3 [Source:HGNC Symbol;Acc:HGNC:6476]	LAG3	-0.374419	0.475042	2.13736	0.143749	0.864353	Unchanged
ENSG00000089693	protein_coding	myeloid leukemia factor 2 [Source:HGNC Symbol;Acc:HGNC:7126]	MLF2	0.0351675	7.16248	0.755144	0.384853	0.948883	Unchanged
ENSG00000089723	protein_coding	OTU deubiquitinase, ubiquitin aldehyde binding 2 [Source:HGNC Symbol;Acc:HGNC:20351]	OTUB2	-0.140954	3.11445	2.01853	0.155389	0.868348	Unchanged
ENSG00000089737	protein_coding	DEAD-box helicase 24 [Source:HGNC Symbol;Acc:HGNC:13266]	DDX24	0.0506366	7.36214	1.96248	0.161248	0.871237	Unchanged
ENSG00000089775	protein_coding	zinc finger and BTB domain containing 25 [Source:HGNC Symbol;Acc:HGNC:13112]	ZBTB25	-0.0494031	5.57636	0.864215	0.352562	0.94355	Unchanged
ENSG00000089818	protein_coding	NECAP endocytosis associated 1 [Source:HGNC Symbol;Acc:HGNC:24539]	NECAP1	0.0274817	4.83759	0.252922	0.615025	0.980546	Unchanged
ENSG00000089820	protein_coding	Rho GTPase activating protein 4 [Source:HGNC Symbol;Acc:HGNC:674]	ARHGAP4	-0.0406033	3.00433	0.173215	0.67727	0.98482	Unchanged
ENSG00000089847	protein_coding	ankyrin repeat domain 24 [Source:HGNC Symbol;Acc:HGNC:29424]	ANKRD24	-0.27484	-0.474559	0.858148	0.354257	0.944619	Unchanged
ENSG00000089876	protein_coding	DEAH-box helicase 32 (putative) [Source:HGNC Symbol;Acc:HGNC:16717]	DHX32	0.0380088	4.86062	0.434617	0.509732	0.973159	Unchanged
ENSG00000089902	protein_coding	REST corepressor 1 [Source:HGNC Symbol;Acc:HGNC:17441]	RCOR1	-0.0537907	6.44057	1.79502	0.180316	0.879851	Unchanged
ENSG00000089916	protein_coding	G-patch domain containing 2 like [Source:HGNC Symbol;Acc:HGNC:20210]	GPATCH2L	-0.119123	6.97032	7.97428	0.00474465	0.38816	Unchanged
ENSG00000090006	protein_coding	latent transforming growth factor beta binding protein 4 [Source:HGNC Symbol;Acc:HGNC:6717]	LTBP4	0.0436324	4.69255	0.532438	0.465584	0.969572	Unchanged
ENSG00000090013	protein_coding	biliverdin reductase B [Source:HGNC Symbol;Acc:HGNC:1063]	BLVRB	-0.103435	0.986906	0.24036	0.623946	0.980546	Unchanged
ENSG00000090020	protein_coding	solute carrier family 9 member A1 [Source:HGNC Symbol;Acc:HGNC:11071]	SLC9A1	0.0929326	3.58623	1.0979	0.294727	0.923628	Unchanged
ENSG00000090054	protein_coding	serine palmitoyltransferase long chain base subunit 1 [Source:HGNC Symbol;Acc:HGNC:11277]	SPTLC1	-0.0528715	6.01449	1.19038	0.275252	0.915816	Unchanged
ENSG00000090060	protein_coding	poly(A) polymerase alpha [Source:HGNC Symbol;Acc:HGNC:14981]	PAPOLA	0.00334149	8.35012	0.0097669	0.921275	0.998208	Unchanged
ENSG00000090061	protein_coding	cyclin K [Source:HGNC Symbol;Acc:HGNC:1596]	CCNK	-0.0241443	5.92195	0.256063	0.612838	0.980546	Unchanged
ENSG00000090097	protein_coding	poly(rC) binding protein 4 [Source:HGNC Symbol;Acc:HGNC:8652]	PCBP4	0.0597972	6.5449	1.88067	0.170258	0.875254	Unchanged
ENSG00000090238	protein_coding	yippee like 3 [Source:HGNC Symbol;Acc:HGNC:18327]	YPEL3	0.150018	4.26294	3.57952	0.058496	0.753885	Unchanged
ENSG00000090263	protein_coding	mitochondrial ribosomal protein S33 [Source:HGNC Symbol;Acc:HGNC:16634]	MRPS33	-0.0108659	5.31617	0.036048	0.849417	0.998179	Unchanged
ENSG00000090266	protein_coding	NADH:ubiquinone oxidoreductase subunit B2 [Source:HGNC Symbol;Acc:HGNC:7697]	NDUFB2	-0.043247	5.50288	0.670977	0.412711	0.955996	Unchanged
ENSG00000090273	protein_coding	nuclear distribution C, dynein complex regulator [Source:HGNC Symbol;Acc:HGNC:8045]	NUDC	-0.0117148	7.20288	0.0914472	0.762345	0.992613	Unchanged
ENSG00000090316	protein_coding	macrophage erythroblast attacher, E3 ubiquitin ligase [Source:HGNC Symbol;Acc:HGNC:13731]	MAEA	-0.0332243	6.17531	0.498003	0.480379	0.970142	Unchanged
ENSG00000090372	protein_coding	striatin 4 [Source:HGNC Symbol;Acc:HGNC:15721]	STRN4	0.00385479	7.16597	0.00839795	0.926984	0.998208	Unchanged
ENSG00000090432	protein_coding	mitochondrial E3 ubiquitin protein ligase 1 [Source:HGNC Symbol;Acc:HGNC:25762]	MUL1	0.0694785	4.59085	1.13378	0.286971	0.921584	Unchanged
ENSG00000090447	protein_coding	transcription factor AP-4 [Source:HGNC Symbol;Acc:HGNC:11745]	TFAP4	0.105824	5.11181	3.03937	0.0812674	0.793475	Unchanged
ENSG00000090470	protein_coding	programmed cell death 7 [Source:HGNC Symbol;Acc:HGNC:8767]	PDCD7	0.0357844	5.62899	0.541497	0.461813	0.969572	Unchanged
ENSG00000090487	protein_coding	SPG21 abhydrolase domain containing, maspardin [Source:HGNC Symbol;Acc:HGNC:20373]	SPG21	0.0672238	6.13454	2.31435	0.128185	0.852697	Unchanged
ENSG00000090520	protein_coding	DnaJ heat shock protein family (Hsp40) member B11 [Source:HGNC Symbol;Acc:HGNC:14889]	DNAJB11	-0.018068	5.70191	0.0917263	0.761994	0.992613	Unchanged
ENSG00000090539	protein_coding	chordin [Source:HGNC Symbol;Acc:HGNC:1949]	CHRD	0.142862	-0.0824697	0.227977	0.633028	0.980546	Unchanged
ENSG00000090554	protein_coding	fms related receptor tyrosine kinase 3 ligand [Source:HGNC Symbol;Acc:HGNC:3766]	FLT3LG	-0.629049	-1.28305	1.67524	0.195558	0.888776	Unchanged
ENSG00000090565	protein_coding	RAB11 family interacting protein 3 [Source:HGNC Symbol;Acc:HGNC:17224]	RAB11FIP3	0.00161082	5.82429	0.0011724	0.972685	0.998791	Unchanged
ENSG00000090581	protein_coding	N-acetylglucosamine-1-phosphate transferase subunit gamma [Source:HGNC Symbol;Acc:HGNC:23026]	GNPTG	0.0832142	4.46345	1.17579	0.278214	0.917499	Unchanged
ENSG00000090612	protein_coding	zinc finger protein 268 [Source:HGNC Symbol;Acc:HGNC:13061]	ZNF268	0.0369234	5.9809	0.479773	0.488525	0.971573	Unchanged
ENSG00000090615	protein_coding	golgin A3 [Source:HGNC Symbol;Acc:HGNC:4426]	GOLGA3	-0.0526747	6.76452	1.46481	0.226167	0.901346	Unchanged
ENSG00000090621	protein_coding	poly(A) binding protein cytoplasmic 4 [Source:HGNC Symbol;Acc:HGNC:8557]	PABPC4	0.0216186	7.91535	0.454889	0.500022	0.972467	Unchanged
ENSG00000090661	protein_coding	ceramide synthase 4 [Source:HGNC Symbol;Acc:HGNC:23747]	CERS4	0.013133	3.76275	0.0274964	0.868298	0.998208	Unchanged
ENSG00000090674	protein_coding	mucolipin TRP cation channel 1 [Source:HGNC Symbol;Acc:HGNC:13356]	MCOLN1	-0.0327653	4.01539	0.143972	0.704364	0.987435	Unchanged
ENSG00000090686	protein_coding	ubiquitin specific peptidase 48 [Source:HGNC Symbol;Acc:HGNC:18533]	USP48	-0.0678824	7.01091	3.38635	0.0657385	0.772788	Unchanged
ENSG00000090776	protein_coding	ephrin B1 [Source:HGNC Symbol;Acc:HGNC:3226]	EFNB1	-0.126299	3.53843	1.83504	0.175534	0.87779	Unchanged
ENSG00000090857	protein_coding	pyruvate dehydrogenase phosphatase regulatory subunit [Source:HGNC Symbol;Acc:HGNC:30264]	PDPR	-0.00573757	6.68278	0.0213375	0.883863	0.998208	Unchanged
ENSG00000090861	protein_coding	alanyl-tRNA synthetase 1 [Source:HGNC Symbol;Acc:HGNC:20]	AARS1	-0.0357053	7.18009	0.986733	0.320542	0.93313	Unchanged
ENSG00000090863	protein_coding	golgi glycoprotein 1 [Source:HGNC Symbol;Acc:HGNC:4316]	GLG1	-0.00877149	7.51296	0.0643098	0.799809	0.994737	Unchanged
ENSG00000090889	protein_coding	kinesin family member 4A [Source:HGNC Symbol;Acc:HGNC:13339]	KIF4A	-0.0354787	7.14923	0.872126	0.350367	0.943484	Unchanged
ENSG00000090905	protein_coding	trinucleotide repeat containing adaptor 6A [Source:HGNC Symbol;Acc:HGNC:11969]	TNRC6A	-0.0164649	7.56426	0.179213	0.672051	0.98482	Unchanged
ENSG00000090924	protein_coding	pleckstrin homology and RhoGEF domain containing G2 [Source:HGNC Symbol;Acc:HGNC:29515]	PLEKHG2	0.00308057	6.30369	0.00471604	0.94525	0.998208	Unchanged
ENSG00000090932	protein_coding	delta like canonical Notch ligand 3 [Source:HGNC Symbol;Acc:HGNC:2909]	DLL3	-0.0630113	2.92879	0.286235	0.592644	0.980546	Unchanged
ENSG00000090971	protein_coding	N-acetyltransferase 14 (putative) [Source:HGNC Symbol;Acc:HGNC:28918]	NAT14	0.0346117	4.48644	0.2344	0.62828	0.980546	Unchanged
ENSG00000090975	protein_coding	phosphatidylinositol transfer protein membrane associated 2 [Source:HGNC Symbol;Acc:HGNC:21044]	PITPNM2	-0.0788612	2.64782	0.359013	0.549055	0.978558	Unchanged
ENSG00000090989	protein_coding	exocyst complex component 1 [Source:HGNC Symbol;Acc:HGNC:30380]	EXOC1	-0.00542398	6.3807	0.0155869	0.900644	0.998208	Unchanged
ENSG00000091009	protein_coding	RNA binding motif protein 27 [Source:HGNC Symbol;Acc:HGNC:29243]	RBM27	-0.0531261	5.52021	1.07717	0.299332	0.925619	Unchanged
ENSG00000091039	protein_coding	oxysterol binding protein like 8 [Source:HGNC Symbol;Acc:HGNC:16396]	OSBPL8	-0.0444238	7.29737	1.06784	0.301433	0.925776	Unchanged
ENSG00000091073	protein_coding	deltex E3 ubiquitin ligase 2 [Source:HGNC Symbol;Acc:HGNC:15973]	DTX2	-0.204495	2.8269	4.04096	0.0444086	0.705042	Unchanged
ENSG00000091127	protein_coding	pseudouridine synthase 7 [Source:HGNC Symbol;Acc:HGNC:26033]	PUS7	0.0722859	6.68805	2.55079	0.110239	0.833452	Unchanged
ENSG00000091128	protein_coding	laminin subunit beta 4 [Source:HGNC Symbol;Acc:HGNC:6491]	LAMB4	0.239762	1.11144	1.10284	0.293644	0.923435	Unchanged
ENSG00000091129	protein_coding	neuronal cell adhesion molecule [Source:HGNC Symbol;Acc:HGNC:7994]	NRCAM	-0.0324056	9.37064	1.12554	0.288729	0.922397	Unchanged
ENSG00000091136	protein_coding	laminin subunit beta 1 [Source:HGNC Symbol;Acc:HGNC:6486]	LAMB1	0.0226942	8.91126	0.421746	0.516067	0.973159	Unchanged
ENSG00000091137	protein_coding	solute carrier family 26 member 4 [Source:HGNC Symbol;Acc:HGNC:8818]	SLC26A4	-0.567198	-1.96309	0.577979	0.447106	0.967042	Unchanged
ENSG00000091140	protein_coding	dihydrolipoamide dehydrogenase [Source:HGNC Symbol;Acc:HGNC:2898]	DLD	0.0116018	6.97292	0.0907683	0.763203	0.992613	Unchanged
ENSG00000091157	protein_coding	WD repeat domain 7 [Source:HGNC Symbol;Acc:HGNC:13490]	WDR7	-0.0525322	5.01699	0.887687	0.346105	0.94294	Unchanged
ENSG00000091164	protein_coding	thioredoxin like 1 [Source:HGNC Symbol;Acc:HGNC:12436]	TXNL1	-0.00901463	6.59424	0.050184	0.822743	0.996176	Unchanged
ENSG00000091262	protein_coding	ATP binding cassette subfamily C member 6 [Source:HGNC Symbol;Acc:HGNC:57]	ABCC6	0.159782	-1.02187	0.151567	0.697042	0.986578	Unchanged
ENSG00000091317	protein_coding	CKLF like MARVEL transmembrane domain containing 6 [Source:HGNC Symbol;Acc:HGNC:19177]	CMTM6	-0.0155512	6.05689	0.103432	0.747749	0.991357	Unchanged
ENSG00000091409	protein_coding	integrin subunit alpha 6 [Source:HGNC Symbol;Acc:HGNC:6142]	ITGA6	-0.0561943	1.26976	0.0922357	0.761354	0.992613	Unchanged
ENSG00000091428	protein_coding	Rap guanine nucleotide exchange factor 4 [Source:HGNC Symbol;Acc:HGNC:16626]	RAPGEF4	0.0096773	5.25523	0.0305896	0.861159	0.998208	Unchanged
ENSG00000091436	protein_coding	mitogen-activated protein kinase kinase kinase 20 [Source:HGNC Symbol;Acc:HGNC:17797]	MAP3K20	-0.0739102	6.10122	2.93374	0.0867465	0.804077	Unchanged
ENSG00000091483	protein_coding	fumarate hydratase [Source:HGNC Symbol;Acc:HGNC:3700]	FH	-0.00210728	6.72905	0.00293407	0.956802	0.998717	Unchanged
ENSG00000091490	protein_coding	SEL1L family member 3 [Source:HGNC Symbol;Acc:HGNC:29108]	SEL1L3	-0.171498	1.41471	0.820734	0.364966	0.945863	Unchanged
ENSG00000091513	protein_coding	transferrin [Source:HGNC Symbol;Acc:HGNC:11740]	TF	-1.03398	-1.72207	2.6099	0.106199	0.832438	Unchanged
ENSG00000091527	protein_coding	CDV3 homolog [Source:HGNC Symbol;Acc:HGNC:26928]	CDV3	0.0101099	7.38205	0.076778	0.781712	0.993101	Unchanged
ENSG00000091536	protein_coding	myosin XVA [Source:HGNC Symbol;Acc:HGNC:7594]	MYO15A	-0.213449	-0.822811	0.318485	0.572519	0.980546	Unchanged
ENSG00000091542	protein_coding	alkB homolog 5, RNA demethylase [Source:HGNC Symbol;Acc:HGNC:25996]	ALKBH5	-0.0238021	6.33863	0.262134	0.608658	0.980546	Unchanged
ENSG00000091622	protein_coding	PITPNM family member 3 [Source:HGNC Symbol;Acc:HGNC:21043]	PITPNM3	0.225343	1.83791	2.21002	0.137117	0.863426	Unchanged
ENSG00000091640	protein_coding	sperm associated antigen 7 [Source:HGNC Symbol;Acc:HGNC:11216]	SPAG7	0.045367	5.12354	0.750894	0.386193	0.950018	Unchanged
ENSG00000091651	protein_coding	origin recognition complex subunit 6 [Source:HGNC Symbol;Acc:HGNC:17151]	ORC6	0.0957098	5.93046	3.75547	0.0526351	0.732354	Unchanged
ENSG00000091656	protein_coding	zinc finger homeobox 4 [Source:HGNC Symbol;Acc:HGNC:30939]	ZFHX4	-0.0931319	6.45868	4.87784	0.0272036	0.631659	Unchanged
ENSG00000091732	protein_coding	zinc finger C3HC-type containing 1 [Source:HGNC Symbol;Acc:HGNC:29913]	ZC3HC1	0.0313463	5.19531	0.36405	0.546266	0.978455	Unchanged
ENSG00000091844	protein_coding	regulator of G protein signaling 17 [Source:HGNC Symbol;Acc:HGNC:14088]	RGS17	-0.0599633	5.22931	0.863934	0.35264	0.94355	Unchanged
ENSG00000091879	protein_coding	angiopoietin 2 [Source:HGNC Symbol;Acc:HGNC:485]	ANGPT2	-0.0923778	0.0405408	0.119743	0.729313	0.990209	Unchanged
ENSG00000091947	protein_coding	transmembrane protein 101 [Source:HGNC Symbol;Acc:HGNC:28653]	TMEM101	0.0316461	3.80701	0.172369	0.678015	0.98482	Unchanged
ENSG00000091972	protein_coding	CD200 molecule [Source:HGNC Symbol;Acc:HGNC:7203]	CD200	-0.0363968	5.23677	0.576709	0.447605	0.967042	Unchanged
ENSG00000091986	protein_coding	coiled-coil domain containing 80 [Source:HGNC Symbol;Acc:HGNC:30649]	CCDC80	-0.0185804	0.270492	0.00698494	0.933394	0.998208	Unchanged
ENSG00000092010	protein_coding	proteasome activator subunit 1 [Source:HGNC Symbol;Acc:HGNC:9568]	PSME1	-0.00385392	5.18037	0.00454815	0.946231	0.998208	Unchanged
ENSG00000092020	protein_coding	protein phosphatase 2 regulatory subunit B''gamma [Source:HGNC Symbol;Acc:HGNC:17485]	PPP2R3C	0.0513605	5.63083	0.906234	0.341116	0.939805	Unchanged
ENSG00000092036	protein_coding	HAUS augmin like complex subunit 4 [Source:HGNC Symbol;Acc:HGNC:20163]	HAUS4	-0.0273101	3.684	0.105193	0.745684	0.990714	Unchanged
ENSG00000092051	protein_coding	junctophilin 4 [Source:HGNC Symbol;Acc:HGNC:20156]	JPH4	-0.0531938	6.90189	1.85842	0.172807	0.877644	Unchanged
ENSG00000092054	protein_coding	myosin heavy chain 7 [Source:HGNC Symbol;Acc:HGNC:7577]	MYH7	0.791179	-1.40044	2.14337	0.143187	0.864353	Unchanged
ENSG00000092094	protein_coding	O-sialoglycoprotein endopeptidase [Source:HGNC Symbol;Acc:HGNC:18028]	OSGEP	0.00571803	4.90984	0.00686982	0.933943	0.998208	Unchanged
ENSG00000092096	protein_coding	solute carrier family 22 member 17 [Source:HGNC Symbol;Acc:HGNC:23095]	SLC22A17	0.00833846	6.16102	0.0247135	0.875083	0.998208	Unchanged
ENSG00000092098	protein_coding	ring finger protein 31 [Source:HGNC Symbol;Acc:HGNC:16031]	RNF31	0.375311	0.834996	2.99604	0.0834683	0.797754	Unchanged
ENSG00000092108	protein_coding	sec1 family domain containing 1 [Source:HGNC Symbol;Acc:HGNC:20726]	SCFD1	-0.0154551	6.06721	0.0888574	0.765635	0.992713	Unchanged
ENSG00000092140	protein_coding	G2/M-phase specific E3 ubiquitin protein ligase [Source:HGNC Symbol;Acc:HGNC:20338]	G2E3	-0.0613266	6.4836	2.10491	0.146827	0.864353	Unchanged
ENSG00000092148	protein_coding	HECT domain E3 ubiquitin protein ligase 1 [Source:HGNC Symbol;Acc:HGNC:20157]	HECTD1	-0.0511791	8.1152	2.15874	0.14176	0.864353	Unchanged
ENSG00000092199	protein_coding	heterogeneous nuclear ribonucleoprotein C [Source:HGNC Symbol;Acc:HGNC:5035]	HNRNPC	0.010238	8.77358	0.0743475	0.785109	0.993101	Unchanged
ENSG00000092201	protein_coding	SPT16 homolog, facilitates chromatin remodeling subunit [Source:HGNC Symbol;Acc:HGNC:11465]	SUPT16H	0.0219301	8.9758	0.455911	0.499541	0.972467	Unchanged
ENSG00000092203	protein_coding	TOX high mobility group box family member 4 [Source:HGNC Symbol;Acc:HGNC:20161]	TOX4	-0.0266999	5.91636	0.352828	0.552517	0.978876	Unchanged
ENSG00000092208	protein_coding	gem nuclear organelle associated protein 2 [Source:HGNC Symbol;Acc:HGNC:10884]	GEMIN2	-0.0542926	2.91943	0.258436	0.611197	0.980546	Unchanged
ENSG00000092295	protein_coding	transglutaminase 1 [Source:HGNC Symbol;Acc:HGNC:11777]	TGM1	-0.0195537	0.613129	0.00817649	0.92795	0.998208	Unchanged
ENSG00000092330	protein_coding	TERF1 interacting nuclear factor 2 [Source:HGNC Symbol;Acc:HGNC:11824]	TINF2	0.00404341	4.65528	0.00400288	0.949553	0.998208	Unchanged
ENSG00000092421	protein_coding	semaphorin 6A [Source:HGNC Symbol;Acc:HGNC:10738]	SEMA6A	-0.0380709	4.56798	0.413294	0.520302	0.97327	Unchanged
ENSG00000092439	protein_coding	transient receptor potential cation channel subfamily M member 7 [Source:HGNC Symbol;Acc:HGNC:17994]	TRPM7	-0.0245453	6.82756	0.273669	0.600881	0.980546	Unchanged
ENSG00000092445	protein_coding	TYRO3 protein tyrosine kinase [Source:HGNC Symbol;Acc:HGNC:12446]	TYRO3	-0.06644	5.06585	1.25891	0.261858	0.912292	Unchanged
ENSG00000092470	protein_coding	WD repeat domain 76 [Source:HGNC Symbol;Acc:HGNC:25773]	WDR76	0.0575005	6.31772	1.86936	0.171549	0.877383	Unchanged
ENSG00000092529	protein_coding	calpain 3 [Source:HGNC Symbol;Acc:HGNC:1480]	CAPN3	-0.432973	-0.729018	1.04421	0.306845	0.927329	Unchanged
ENSG00000092531	protein_coding	synaptosome associated protein 23 [Source:HGNC Symbol;Acc:HGNC:11131]	SNAP23	-0.062391	3.8236	0.479653	0.48858	0.971573	Unchanged
ENSG00000092621	protein_coding	phosphoglycerate dehydrogenase [Source:HGNC Symbol;Acc:HGNC:8923]	PHGDH	-0.0128317	7.14701	0.0991569	0.752844	0.992194	Unchanged
ENSG00000092758	protein_coding	collagen type IX alpha 3 chain [Source:HGNC Symbol;Acc:HGNC:2219]	COL9A3	0.0214177	0.835303	0.00922366	0.923489	0.998208	Unchanged
ENSG00000092820	protein_coding	ezrin [Source:HGNC Symbol;Acc:HGNC:12691]	EZR	-0.0221486	6.49803	0.286806	0.592275	0.980546	Unchanged
ENSG00000092841	protein_coding	myosin light chain 6 [Source:HGNC Symbol;Acc:HGNC:7587]	MYL6	0.0231304	7.3841	0.357247	0.550039	0.978558	Unchanged
ENSG00000092847	protein_coding	argonaute RISC component 1 [Source:HGNC Symbol;Acc:HGNC:3262]	AGO1	-0.0478408	6.92103	1.32542	0.249621	0.908632	Unchanged
ENSG00000092850	protein_coding	tektin 2 [Source:HGNC Symbol;Acc:HGNC:11725]	TEKT2	0.124098	1.4847	0.60226	0.437717	0.964645	Unchanged
ENSG00000092853	protein_coding	claspin [Source:HGNC Symbol;Acc:HGNC:19715]	CLSPN	0.0973399	7.20152	2.90203	0.0884682	0.808229	Unchanged
ENSG00000092871	protein_coding	ring finger and FYVE like domain containing E3 ubiquitin protein ligase [Source:HGNC Symbol;Acc:HGNC:24821]	RFFL	-0.0205291	3.72703	0.0573709	0.810701	0.996154	Unchanged
ENSG00000092929	protein_coding	unc-13 homolog D [Source:HGNC Symbol;Acc:HGNC:23147]	UNC13D	0.0466422	5.72522	0.685231	0.407791	0.954361	Unchanged
ENSG00000092931	protein_coding	major facilitator superfamily domain containing 11 [Source:HGNC Symbol;Acc:HGNC:25458]	MFSD11	0.00161673	5.05659	0.0010357	0.974327	0.998791	Unchanged
ENSG00000092964	protein_coding	dihydropyrimidinase like 2 [Source:HGNC Symbol;Acc:HGNC:3014]	DPYSL2	-0.0322148	9.12919	0.739016	0.389976	0.951662	Unchanged
ENSG00000092969	protein_coding	transforming growth factor beta 2 [Source:HGNC Symbol;Acc:HGNC:11768]	TGFB2	0.173107	-0.237795	0.379197	0.538033	0.976464	Unchanged
ENSG00000092978	protein_coding	G-patch domain containing 2 [Source:HGNC Symbol;Acc:HGNC:25499]	GPATCH2	0.0471288	5.70479	0.823747	0.364087	0.945863	Unchanged
ENSG00000093000	protein_coding	nucleoporin 50 [Source:HGNC Symbol;Acc:HGNC:8065]	NUP50	-0.0101432	7.24135	0.0805385	0.776569	0.993101	Unchanged
ENSG00000093009	protein_coding	cell division cycle 45 [Source:HGNC Symbol;Acc:HGNC:1739]	CDC45	0.0107791	6.12942	0.0505069	0.822183	0.996176	Unchanged
ENSG00000093010	protein_coding	catechol-O-methyltransferase [Source:HGNC Symbol;Acc:HGNC:2228]	COMT	0.0419872	4.50865	0.33977	0.559962	0.979603	Unchanged
ENSG00000093072	protein_coding	adenosine deaminase 2 [Source:HGNC Symbol;Acc:HGNC:1839]	ADA2	0.366738	-0.228497	1.4532	0.228015	0.901346	Unchanged
ENSG00000093100	lncRNA	novel transcript	AC016026.1	-0.485842	0.0246223	2.99573	0.0834845	0.797754	Unchanged
ENSG00000093144	protein_coding	ethylmalonyl-CoA decarboxylase 1 [Source:HGNC Symbol;Acc:HGNC:21489]	ECHDC1	0.0845955	5.98859	3.6308	0.0567195	0.750997	Unchanged
ENSG00000093167	protein_coding	LRR binding FLII interacting protein 2 [Source:HGNC Symbol;Acc:HGNC:6703]	LRRFIP2	-0.0404843	5.63529	0.79673	0.372073	0.946588	Unchanged
ENSG00000093183	protein_coding	SEC22 homolog C, vesicle trafficking protein [Source:HGNC Symbol;Acc:HGNC:16828]	SEC22C	-0.00843712	6.42718	0.0430892	0.835557	0.996176	Unchanged
ENSG00000093217	protein_coding	xylulokinase [Source:HGNC Symbol;Acc:HGNC:12839]	XYLB	-0.0797497	4.55034	1.38781	0.238775	0.906228	Unchanged
ENSG00000094631	protein_coding	histone deacetylase 6 [Source:HGNC Symbol;Acc:HGNC:14064]	HDAC6	-0.00414874	6.00361	0.00657664	0.935365	0.998208	Unchanged
ENSG00000094755	protein_coding	gamma-aminobutyric acid type A receptor subunit pi [Source:HGNC Symbol;Acc:HGNC:4089]	GABRP	-0.82207	-0.351012	5.94269	0.0147784	0.54099	Unchanged
ENSG00000094804	protein_coding	cell division cycle 6 [Source:HGNC Symbol;Acc:HGNC:1744]	CDC6	0.0392078	6.58247	0.794638	0.372701	0.946714	Unchanged
ENSG00000094841	protein_coding	uracil phosphoribosyltransferase homolog [Source:HGNC Symbol;Acc:HGNC:28334]	UPRT	0.0638005	3.74355	0.619708	0.431156	0.961199	Unchanged
ENSG00000094880	protein_coding	cell division cycle 23 [Source:HGNC Symbol;Acc:HGNC:1724]	CDC23	-0.0254755	5.9009	0.36629	0.545033	0.977938	Unchanged
ENSG00000094914	protein_coding	aladin WD repeat nucleoporin [Source:HGNC Symbol;Acc:HGNC:13666]	AAAS	-0.0367336	5.71885	0.61841	0.431639	0.96153	Unchanged
ENSG00000094916	protein_coding	chromobox 5 [Source:HGNC Symbol;Acc:HGNC:1555]	CBX5	-0.0026095	10.2448	0.00573727	0.939622	0.998208	Unchanged
ENSG00000094975	protein_coding	SUN domain containing ossification factor [Source:HGNC Symbol;Acc:HGNC:1240]	SUCO	-0.0520408	7.07992	1.39281	0.237932	0.906186	Unchanged
ENSG00000095002	protein_coding	mutS homolog 2 [Source:HGNC Symbol;Acc:HGNC:7325]	MSH2	-0.039237	7.89361	1.03514	0.308954	0.928817	Unchanged
ENSG00000095015	protein_coding	mitogen-activated protein kinase kinase kinase 1 [Source:HGNC Symbol;Acc:HGNC:6848]	MAP3K1	0.0610467	7.67606	3.38756	0.0656901	0.772788	Unchanged
ENSG00000095059	protein_coding	deoxyhypusine synthase [Source:HGNC Symbol;Acc:HGNC:2869]	DHPS	0.199288	2.87132	3.10165	0.0782132	0.787018	Unchanged
ENSG00000095066	protein_coding	hook microtubule tethering protein 2 [Source:HGNC Symbol;Acc:HGNC:19885]	HOOK2	-0.0237	4.68221	0.118009	0.731205	0.990209	Unchanged
ENSG00000095139	protein_coding	archain 1 [Source:HGNC Symbol;Acc:HGNC:649]	ARCN1	-0.0474477	7.4158	1.74624	0.18635	0.882557	Unchanged
ENSG00000095203	protein_coding	erythrocyte membrane protein band 4.1 like 4B [Source:HGNC Symbol;Acc:HGNC:19818]	EPB41L4B	0.225615	2.4788	2.65034	0.103528	0.829199	Unchanged
ENSG00000095209	protein_coding	transmembrane protein 38B [Source:HGNC Symbol;Acc:HGNC:25535]	TMEM38B	0.0720102	3.73713	0.632146	0.426569	0.959463	Unchanged
ENSG00000095261	protein_coding	proteasome 26S subunit, non-ATPase 5 [Source:HGNC Symbol;Acc:HGNC:9563]	PSMD5	-0.0762726	5.42691	2.44605	0.117821	0.844422	Unchanged
ENSG00000095303	protein_coding	prostaglandin-endoperoxide synthase 1 [Source:HGNC Symbol;Acc:HGNC:9604]	PTGS1	0.567266	-1.70824	0.762626	0.382508	0.94836	Unchanged
ENSG00000095319	protein_coding	nucleoporin 188 [Source:HGNC Symbol;Acc:HGNC:17859]	NUP188	-0.0190073	7.57245	0.234081	0.628514	0.980546	Unchanged
ENSG00000095321	protein_coding	carnitine O-acetyltransferase [Source:HGNC Symbol;Acc:HGNC:2342]	CRAT	0.036307	4.60995	0.39041	0.532084	0.974814	Unchanged
ENSG00000095370	protein_coding	SH2 domain containing 3C [Source:HGNC Symbol;Acc:HGNC:16884]	SH2D3C	-0.0603146	4.43009	0.767793	0.380901	0.94836	Unchanged
ENSG00000095380	protein_coding	N-acetylneuraminate synthase [Source:HGNC Symbol;Acc:HGNC:19237]	NANS	-0.067015	4.22812	0.710634	0.399234	0.95338	Unchanged
ENSG00000095383	protein_coding	TBC1 domain family member 2 [Source:HGNC Symbol;Acc:HGNC:18026]	TBC1D2	0.00110369	1.29069	3.82716e-05	0.995064	0.999523	Unchanged
ENSG00000095397	protein_coding	whirlin [Source:HGNC Symbol;Acc:HGNC:16361]	WHRN	-0.373321	0.365178	2.60792	0.106331	0.832438	Unchanged
ENSG00000095485	protein_coding	CWF19 like cell cycle control factor 1 [Source:HGNC Symbol;Acc:HGNC:25613]	CWF19L1	0.103024	5.10191	3.20937	0.0732175	0.782824	Unchanged
ENSG00000095539	protein_coding	semaphorin 4G [Source:HGNC Symbol;Acc:HGNC:10735]	SEMA4G	0.0705369	3.92921	0.967308	0.325352	0.933855	Unchanged
ENSG00000095564	protein_coding	B-TFIID TATA-box binding protein associated factor 1 [Source:HGNC Symbol;Acc:HGNC:17307]	BTAF1	0.0250456	6.90861	0.41042	0.521756	0.97327	Unchanged
ENSG00000095574	protein_coding	IKAROS family zinc finger 5 [Source:HGNC Symbol;Acc:HGNC:14283]	IKZF5	-0.0475883	4.89698	0.649692	0.420223	0.957405	Unchanged
ENSG00000095587	protein_coding	tolloid like 2 [Source:HGNC Symbol;Acc:HGNC:11844]	TLL2	0.648272	-1.58971	1.30676	0.252981	0.91002	Unchanged
ENSG00000095637	protein_coding	sorbin and SH3 domain containing 1 [Source:HGNC Symbol;Acc:HGNC:14565]	SORBS1	-0.0177438	4.90464	0.0863716	0.768842	0.992936	Unchanged
ENSG00000095713	protein_coding	cartilage acidic protein 1 [Source:HGNC Symbol;Acc:HGNC:14882]	CRTAC1	0.0288224	4.00695	0.0795273	0.777939	0.993101	Unchanged
ENSG00000095739	protein_coding	BMP and activin membrane bound inhibitor [Source:HGNC Symbol;Acc:HGNC:30251]	BAMBI	-0.159412	4.63451	5.04002	0.0247682	0.619491	Unchanged
ENSG00000095752	protein_coding	interleukin 11 [Source:HGNC Symbol;Acc:HGNC:5966]	IL11	0.124148	0.995003	0.377215	0.539098	0.97653	Unchanged
ENSG00000095787	protein_coding	WW domain containing adaptor with coiled-coil [Source:HGNC Symbol;Acc:HGNC:17327]	WAC	-0.00679363	7.84452	0.0400758	0.841332	0.996482	Unchanged
ENSG00000095794	protein_coding	cAMP responsive element modulator [Source:HGNC Symbol;Acc:HGNC:2352]	CREM	-0.0337366	3.68708	0.166549	0.683197	0.985686	Unchanged
ENSG00000095906	protein_coding	nucleotide binding protein 2 [Source:HGNC Symbol;Acc:HGNC:8042]	NUBP2	0.0824025	5.84877	1.73274	0.188061	0.884048	Unchanged
ENSG00000095951	protein_coding	HIVEP zinc finger 1 [Source:HGNC Symbol;Acc:HGNC:4920]	HIVEP1	-0.158696	5.45453	10.181	0.00141892	0.222576	Unchanged
ENSG00000096060	protein_coding	FKBP prolyl isomerase 5 [Source:HGNC Symbol;Acc:HGNC:3721]	FKBP5	0.00723183	5.9558	0.0226432	0.880389	0.998208	Unchanged
ENSG00000096063	protein_coding	SRSF protein kinase 1 [Source:HGNC Symbol;Acc:HGNC:11305]	SRPK1	0.00294154	7.48702	0.00669589	0.934783	0.998208	Unchanged
ENSG00000096070	protein_coding	bromodomain and PHD finger containing 3 [Source:HGNC Symbol;Acc:HGNC:14256]	BRPF3	0.0222242	5.98814	0.225987	0.634516	0.980546	Unchanged
ENSG00000096080	protein_coding	mitochondrial ribosomal protein S18A [Source:HGNC Symbol;Acc:HGNC:14515]	MRPS18A	0.0423099	4.05611	0.2827	0.594937	0.980546	Unchanged
ENSG00000096092	protein_coding	transmembrane protein 14A [Source:HGNC Symbol;Acc:HGNC:21076]	TMEM14A	-0.0400315	5.11949	0.306327	0.579943	0.980546	Unchanged
ENSG00000096093	protein_coding	EF-hand domain containing 1 [Source:HGNC Symbol;Acc:HGNC:16406]	EFHC1	-0.0670373	5.51398	2.02944	0.154277	0.867685	Unchanged
ENSG00000096384	protein_coding	heat shock protein 90 alpha family class B member 1 [Source:HGNC Symbol;Acc:HGNC:5258]	HSP90AB1	0.015026	10.6057	0.220387	0.638745	0.981605	Unchanged
ENSG00000096401	protein_coding	cell division cycle 5 like [Source:HGNC Symbol;Acc:HGNC:1743]	CDC5L	0.00216781	7.21151	0.00260764	0.959274	0.998791	Unchanged
ENSG00000096433	protein_coding	inositol 1,4,5-trisphosphate receptor type 3 [Source:HGNC Symbol;Acc:HGNC:6182]	ITPR3	0.101333	3.21003	1.20803	0.271723	0.914023	Unchanged
ENSG00000096654	protein_coding	zinc finger protein 184 [Source:HGNC Symbol;Acc:HGNC:12975]	ZNF184	0.126912	4.55723	3.54218	0.0598268	0.758663	Unchanged
ENSG00000096717	protein_coding	sirtuin 1 [Source:HGNC Symbol;Acc:HGNC:14929]	SIRT1	0.00103182	6.06323	0.000527007	0.981685	0.999305	Unchanged
ENSG00000096746	protein_coding	heterogeneous nuclear ribonucleoprotein H3 [Source:HGNC Symbol;Acc:HGNC:5043]	HNRNPH3	0.00151038	8.41404	0.00185801	0.965618	0.998791	Unchanged
ENSG00000096872	protein_coding	intraflagellar transport 74 [Source:HGNC Symbol;Acc:HGNC:21424]	IFT74	-0.0980328	4.64263	2.42847	0.119149	0.845918	Unchanged
ENSG00000096968	protein_coding	Janus kinase 2 [Source:HGNC Symbol;Acc:HGNC:6192]	JAK2	-0.0481454	3.75594	0.250667	0.616606	0.980546	Unchanged
ENSG00000097007	protein_coding	ABL proto-oncogene 1, non-receptor tyrosine kinase [Source:HGNC Symbol;Acc:HGNC:76]	ABL1	-0.00575617	7.34262	0.0193207	0.889451	0.998208	Unchanged
ENSG00000097021	protein_coding	acyl-CoA thioesterase 7 [Source:HGNC Symbol;Acc:HGNC:24157]	ACOT7	0.0345345	6.93936	0.691552	0.405637	0.954361	Unchanged
ENSG00000097033	protein_coding	SH3 domain containing GRB2 like, endophilin B1 [Source:HGNC Symbol;Acc:HGNC:10833]	SH3GLB1	-0.0662598	6.38171	2.92596	0.0871655	0.804398	Unchanged
ENSG00000097046	protein_coding	cell division cycle 7 [Source:HGNC Symbol;Acc:HGNC:1745]	CDC7	0.0609455	6.23084	1.80752	0.178806	0.879851	Unchanged
ENSG00000099194	protein_coding	stearoyl-CoA desaturase [Source:HGNC Symbol;Acc:HGNC:10571]	SCD	-0.0395935	8.97356	1.06879	0.301219	0.925776	Unchanged
ENSG00000099203	protein_coding	transmembrane p24 trafficking protein 1 [Source:HGNC Symbol;Acc:HGNC:17291]	TMED1	0.253512	3.28437	6.61138	0.0101329	0.474527	Unchanged
ENSG00000099204	protein_coding	actin binding LIM protein 1 [Source:HGNC Symbol;Acc:HGNC:78]	ABLIM1	-0.0651117	7.50803	3.11011	0.0778078	0.787018	Unchanged
ENSG00000099219	protein_coding	endoplasmic reticulum metallopeptidase 1 [Source:HGNC Symbol;Acc:HGNC:23703]	ERMP1	-0.037523	3.7258	0.186823	0.665574	0.984459	Unchanged
ENSG00000099246	protein_coding	RAB18, member RAS oncogene family [Source:HGNC Symbol;Acc:HGNC:14244]	RAB18	0.0615342	6.0304	1.9759	0.159823	0.871237	Unchanged
ENSG00000099250	protein_coding	neuropilin 1 [Source:HGNC Symbol;Acc:HGNC:8004]	NRP1	0.0111325	3.13526	0.0130206	0.909152	0.998208	Unchanged
ENSG00000099251	transcribed_unprocessed_pseudogene	hydroxysteroid 17-beta dehydrogenase 7 pseudogene 2 [Source:HGNC Symbol;Acc:HGNC:28120]	HSD17B7P2	0.103945	1.33535	0.357432	0.549936	0.978558	Unchanged
ENSG00000099256	protein_coding	phosphoribosyl transferase domain containing 1 [Source:HGNC Symbol;Acc:HGNC:23333]	PRTFDC1	-0.0920227	3.36363	1.02373	0.311635	0.930419	Unchanged
ENSG00000099282	protein_coding	tetraspanin 15 [Source:HGNC Symbol;Acc:HGNC:23298]	TSPAN15	-0.0310482	3.27481	0.101212	0.750379	0.992067	Unchanged
ENSG00000099284	protein_coding	macroH2A.2 histone [Source:HGNC Symbol;Acc:HGNC:14453]	MACROH2A2	0.0379149	7.17518	1.02914	0.310361	0.930419	Unchanged
ENSG00000099290	protein_coding	WASH complex subunit 2A [Source:HGNC Symbol;Acc:HGNC:23416]	WASHC2A	-0.0626307	4.74601	1.19326	0.274674	0.915447	Unchanged
ENSG00000099308	protein_coding	microtubule associated serine/threonine kinase 3 [Source:HGNC Symbol;Acc:HGNC:19036]	MAST3	-0.107868	4.90138	2.70328	0.100142	0.825821	Unchanged
ENSG00000099326	protein_coding	myeloid zinc finger 1 [Source:HGNC Symbol;Acc:HGNC:13108]	MZF1	0.0341416	5.5872	0.28558	0.593067	0.980546	Unchanged
ENSG00000099330	protein_coding	occludin/ELL domain containing 1 [Source:HGNC Symbol;Acc:HGNC:26221]	OCEL1	-0.271365	2.44676	5.21489	0.0223942	0.605726	Unchanged
ENSG00000099331	protein_coding	myosin IXB [Source:HGNC Symbol;Acc:HGNC:7609]	MYO9B	-0.031285	7.16694	0.690496	0.405996	0.954361	Unchanged
ENSG00000099337	protein_coding	potassium two pore domain channel subfamily K member 6 [Source:HGNC Symbol;Acc:HGNC:6281]	KCNK6	-0.867204	-0.551807	4.4233	0.0354513	0.665915	Unchanged
ENSG00000099338	protein_coding	cation channel sperm associated auxiliary subunit gamma [Source:HGNC Symbol;Acc:HGNC:25243]	CATSPERG	-0.0300726	1.47893	0.0404187	0.840664	0.996482	Unchanged
ENSG00000099341	protein_coding	proteasome 26S subunit, non-ATPase 8 [Source:HGNC Symbol;Acc:HGNC:9566]	PSMD8	0.0274011	6.83106	0.57077	0.449953	0.968351	Unchanged
ENSG00000099364	protein_coding	F-box and leucine rich repeat protein 19 [Source:HGNC Symbol;Acc:HGNC:25300]	FBXL19	-0.0875137	6.32949	2.42691	0.119268	0.845918	Unchanged
ENSG00000099365	protein_coding	syntaxin 1B [Source:HGNC Symbol;Acc:HGNC:18539]	STX1B	0.0199655	4.50112	0.0886356	0.765919	0.992826	Unchanged
ENSG00000099377	protein_coding	hydroxy-delta-5-steroid dehydrogenase, 3 beta- and steroid delta-isomerase 7 [Source:HGNC Symbol;Acc:HGNC:18324]	HSD3B7	-0.183077	-0.213433	0.400638	0.52676	0.97327	Unchanged
ENSG00000099381	protein_coding	SET domain containing 1A, histone lysine methyltransferase [Source:HGNC Symbol;Acc:HGNC:29010]	SETD1A	0.0183402	6.26943	0.157013	0.691922	0.986442	Unchanged
ENSG00000099385	protein_coding	BAF chromatin remodeling complex subunit BCL7C [Source:HGNC Symbol;Acc:HGNC:1006]	BCL7C	0.0508226	4.70914	0.592215	0.441564	0.965512	Unchanged
ENSG00000099399	protein_coding	MAGE family member B2 [Source:HGNC Symbol;Acc:HGNC:6809]	MAGEB2	0.714361	-1.31445	1.85246	0.173498	0.87779	Unchanged
ENSG00000099617	protein_coding	ephrin A2 [Source:HGNC Symbol;Acc:HGNC:3222]	EFNA2	-0.191259	4.05999	6.98268	0.00823021	0.463684	Unchanged
ENSG00000099622	protein_coding	cold inducible RNA binding protein [Source:HGNC Symbol;Acc:HGNC:1982]	CIRBP	0.119313	8.04774	13.511	0.000237171	0.0871895	Unchanged
ENSG00000099624	protein_coding	ATP synthase F1 subunit delta [Source:HGNC Symbol;Acc:HGNC:837]	ATP5F1D	-0.0424079	5.4588	0.40503	0.524503	0.97327	Unchanged
ENSG00000099625	protein_coding	CACN subunit beta associated regulatory protein [Source:HGNC Symbol;Acc:HGNC:28617]	CBARP	-0.111238	4.56671	1.99053	0.158285	0.871155	Unchanged
ENSG00000099783	protein_coding	heterogeneous nuclear ribonucleoprotein M [Source:HGNC Symbol;Acc:HGNC:5046]	HNRNPM	0.0100714	8.68102	0.10461	0.746367	0.990714	Unchanged
ENSG00000099785	protein_coding	membrane associated ring-CH-type finger 2 [Source:HGNC Symbol;Acc:HGNC:28038]	MARCHF2	0.11468	3.16647	1.06291	0.302552	0.925788	Unchanged
ENSG00000099795	protein_coding	NADH:ubiquinone oxidoreductase subunit B7 [Source:HGNC Symbol;Acc:HGNC:7702]	NDUFB7	0.0828394	5.29764	2.27047	0.13186	0.856187	Unchanged
ENSG00000099797	protein_coding	trans-2,3-enoyl-CoA reductase [Source:HGNC Symbol;Acc:HGNC:4551]	TECR	0.0513738	5.20673	0.618348	0.431662	0.96153	Unchanged
ENSG00000099800	protein_coding	translocase of inner mitochondrial membrane 13 [Source:HGNC Symbol;Acc:HGNC:11816]	TIMM13	0.0670888	5.88915	1.88795	0.169434	0.874921	Unchanged
ENSG00000099804	protein_coding	cell division cycle 34, ubiqiutin conjugating enzyme [Source:HGNC Symbol;Acc:HGNC:1734]	CDC34	-0.0235329	5.34254	0.200721	0.65414	0.982795	Unchanged
ENSG00000099810	protein_coding	methylthioadenosine phosphorylase [Source:HGNC Symbol;Acc:HGNC:7413]	MTAP	-0.0631007	6.54349	2.28196	0.130887	0.855003	Unchanged
ENSG00000099812	protein_coding	mitotic spindle positioning [Source:HGNC Symbol;Acc:HGNC:27000]	MISP	0.914493	-2.11875	1.3286	0.249054	0.907936	Unchanged
ENSG00000099814	protein_coding	centrosomal protein 170B [Source:HGNC Symbol;Acc:HGNC:20362]	CEP170B	0.0216087	5.4273	0.124212	0.72451	0.990209	Unchanged
ENSG00000099817	protein_coding	RNA polymerase II, I and III subunit E [Source:HGNC Symbol;Acc:HGNC:9192]	POLR2E	0.0316007	6.46399	0.311987	0.576463	0.980546	Unchanged
ENSG00000099821	protein_coding	RNA polymerase mitochondrial [Source:HGNC Symbol;Acc:HGNC:9200]	POLRMT	0.0647108	5.46188	1.08964	0.296551	0.925359	Unchanged
ENSG00000099822	protein_coding	hyperpolarization activated cyclic nucleotide gated potassium and sodium channel 2 [Source:HGNC Symbol;Acc:HGNC:4846]	HCN2	-0.0476733	4.16049	0.341434	0.559002	0.979393	Unchanged
ENSG00000099840	protein_coding	IZUMO family member 4 [Source:HGNC Symbol;Acc:HGNC:26950]	IZUMO4	0.637252	-0.445889	3.04083	0.0811945	0.793377	Unchanged
ENSG00000099849	protein_coding	Ras association domain family member 7 [Source:HGNC Symbol;Acc:HGNC:1166]	RASSF7	-0.215882	2.4187	2.33333	0.126631	0.850482	Unchanged
ENSG00000099864	protein_coding	paralemmin [Source:HGNC Symbol;Acc:HGNC:8594]	PALM	-0.0514119	6.57027	1.22016	0.269329	0.914023	Unchanged
ENSG00000099866	protein_coding	mucosal vascular addressin cell adhesion molecule 1 [Source:HGNC Symbol;Acc:HGNC:6765]	MADCAM1	0.158919	-0.979922	0.109156	0.741108	0.990714	Unchanged
ENSG00000099869	lncRNA	IGF2 antisense RNA [Source:HGNC Symbol;Acc:HGNC:14062]	IGF2-AS	0.0626917	-0.0269761	0.0780846	0.77991	0.993101	Unchanged
ENSG00000099875	protein_coding	MAPK interacting serine/threonine kinase 2 [Source:HGNC Symbol;Acc:HGNC:7111]	MKNK2	-0.10772	5.48715	3.62304	0.0569848	0.751028	Unchanged
ENSG00000099889	protein_coding	ARVCF delta catenin family member [Source:HGNC Symbol;Acc:HGNC:728]	ARVCF	-0.0399214	5.7345	0.514821	0.473059	0.969572	Unchanged
ENSG00000099899	protein_coding	tRNA methyltransferase 2 homolog A [Source:HGNC Symbol;Acc:HGNC:24974]	TRMT2A	0.0393352	4.88802	0.441175	0.506556	0.973159	Unchanged
ENSG00000099901	protein_coding	RAN binding protein 1 [Source:HGNC Symbol;Acc:HGNC:9847]	RANBP1	0.0418204	7.80647	1.16637	0.280147	0.918563	Unchanged
ENSG00000099904	protein_coding	zinc finger DHHC-type palmitoyltransferase 8 [Source:HGNC Symbol;Acc:HGNC:18474]	ZDHHC8	-0.0622975	5.53559	1.01794	0.313008	0.93049	Unchanged
ENSG00000099910	protein_coding	kelch like family member 22 [Source:HGNC Symbol;Acc:HGNC:25888]	KLHL22	-0.0284638	4.94202	0.220599	0.638584	0.981605	Unchanged
ENSG00000099917	protein_coding	mediator complex subunit 15 [Source:HGNC Symbol;Acc:HGNC:14248]	MED15	0.0166015	6.09152	0.132346	0.716012	0.989751	Unchanged
ENSG00000099940	protein_coding	synaptosome associated protein 29 [Source:HGNC Symbol;Acc:HGNC:11133]	SNAP29	-0.0820511	5.23986	2.55758	0.109767	0.833452	Unchanged
ENSG00000099942	protein_coding	CRK like proto-oncogene, adaptor protein [Source:HGNC Symbol;Acc:HGNC:2363]	CRKL	-0.0363705	7.23977	0.950741	0.329531	0.933855	Unchanged
ENSG00000099949	protein_coding	leucine zipper like transcription regulator 1 [Source:HGNC Symbol;Acc:HGNC:6742]	LZTR1	0.041036	3.97915	0.240112	0.624125	0.980546	Unchanged
ENSG00000099953	protein_coding	matrix metallopeptidase 11 [Source:HGNC Symbol;Acc:HGNC:7157]	MMP11	0.0840982	3.04444	0.576959	0.447507	0.967042	Unchanged
ENSG00000099956	protein_coding	SWI/SNF related, matrix associated, actin dependent regulator of chromatin, subfamily b, member 1 [Source:HGNC Symbol;Acc:HGNC:11103]	SMARCB1	0.0242652	6.95706	0.376573	0.539443	0.97653	Unchanged
ENSG00000099957	protein_coding	purinergic receptor P2X 6 [Source:HGNC Symbol;Acc:HGNC:8538]	P2RX6	-0.0827532	1.91069	0.292846	0.588403	0.980546	Unchanged
ENSG00000099968	protein_coding	BCL2 like 13 [Source:HGNC Symbol;Acc:HGNC:17164]	BCL2L13	-0.0355778	5.73811	0.516455	0.472358	0.969572	Unchanged
ENSG00000099974	protein_coding	D-dopachrome tautomerase like [Source:HGNC Symbol;Acc:HGNC:33446]	DDTL	-0.0199427	-0.293377	0.00415378	0.948612	0.998208	Unchanged
ENSG00000099984	polymorphic_pseudogene	glutathione S-transferase theta 2 (gene/pseudogene) [Source:HGNC Symbol;Acc:HGNC:4642]	GSTT2	-0.254239	-1.14653	0.264192	0.607254	0.980546	Unchanged
ENSG00000099991	protein_coding	calcineurin binding protein 1 [Source:HGNC Symbol;Acc:HGNC:24187]	CABIN1	0.00711209	6.64748	0.0274756	0.868348	0.998208	Unchanged
ENSG00000099992	protein_coding	TBC1 domain family member 10A [Source:HGNC Symbol;Acc:HGNC:23609]	TBC1D10A	-0.229718	1.399	1.8534	0.173389	0.87779	Unchanged
ENSG00000099994	protein_coding	sushi domain containing 2 [Source:HGNC Symbol;Acc:HGNC:30667]	SUSD2	0.123104	-0.405933	0.146524	0.70188	0.987156	Unchanged
ENSG00000099995	protein_coding	splicing factor 3a subunit 1 [Source:HGNC Symbol;Acc:HGNC:10765]	SF3A1	-0.00438065	7.52056	0.0135305	0.907399	0.998208	Unchanged
ENSG00000099999	protein_coding	ring finger protein 215 [Source:HGNC Symbol;Acc:HGNC:33434]	RNF215	0.0774016	3.90759	1.00575	0.315923	0.930972	Unchanged
ENSG00000100003	protein_coding	SEC14 like lipid binding 2 [Source:HGNC Symbol;Acc:HGNC:10699]	SEC14L2	-0.0109007	1.98119	0.00643684	0.936054	0.998208	Unchanged
ENSG00000100014	protein_coding	sperm antigen with calponin homology and coiled-coil domains 1 like [Source:HGNC Symbol;Acc:HGNC:29022]	SPECC1L	0.0122786	5.78454	0.0688967	0.79295	0.994218	Unchanged
ENSG00000100023	protein_coding	peptidylprolyl isomerase like 2 [Source:HGNC Symbol;Acc:HGNC:9261]	PPIL2	0.0112972	6.27035	0.0634853	0.80107	0.994954	Unchanged
ENSG00000100024	protein_coding	beta-ureidopropionase 1 [Source:HGNC Symbol;Acc:HGNC:16297]	UPB1	-0.0266881	0.116176	0.00929371	0.9232	0.998208	Unchanged
ENSG00000100027	protein_coding	yippee like 1 [Source:HGNC Symbol;Acc:HGNC:12845]	YPEL1	-0.0423442	5.78246	0.677785	0.410351	0.954773	Unchanged
ENSG00000100028	protein_coding	small nuclear ribonucleoprotein D3 polypeptide [Source:HGNC Symbol;Acc:HGNC:11160]	SNRPD3	-0.0203023	6.54256	0.206033	0.649895	0.982638	Unchanged
ENSG00000100029	protein_coding	pescadillo ribosomal biogenesis factor 1 [Source:HGNC Symbol;Acc:HGNC:8848]	PES1	0.0212842	6.48099	0.282189	0.59527	0.980546	Unchanged
ENSG00000100030	protein_coding	mitogen-activated protein kinase 1 [Source:HGNC Symbol;Acc:HGNC:6871]	MAPK1	-0.0323843	6.69132	0.668851	0.413453	0.95664	Unchanged
ENSG00000100034	protein_coding	protein phosphatase, Mg2+/Mn2+ dependent 1F [Source:HGNC Symbol;Acc:HGNC:19388]	PPM1F	-0.0303115	5.87602	0.332085	0.564434	0.980269	Unchanged
ENSG00000100036	protein_coding	solute carrier family 35 member E4 [Source:HGNC Symbol;Acc:HGNC:17058]	SLC35E4	0.142424	2.47684	1.33949	0.247124	0.907195	Unchanged
ENSG00000100038	protein_coding	DNA topoisomerase III beta [Source:HGNC Symbol;Acc:HGNC:11993]	TOP3B	0.149197	4.90583	5.79283	0.0160917	0.547401	Unchanged
ENSG00000100053	protein_coding	crystallin beta B3 [Source:HGNC Symbol;Acc:HGNC:2400]	CRYBB3	-0.505389	-1.23259	0.917733	0.338071	0.938227	Unchanged
ENSG00000100056	protein_coding	ess-2 splicing factor homolog [Source:HGNC Symbol;Acc:HGNC:16817]	ESS2	-0.0284248	4.28393	0.156701	0.692212	0.986442	Unchanged
ENSG00000100058	transcribed_unprocessed_pseudogene	crystallin beta B2 pseudogene 1 [Source:HGNC Symbol;Acc:HGNC:2399]	CRYBB2P1	0.00283874	3.6905	0.00131177	0.971108	0.998791	Unchanged
ENSG00000100060	protein_coding	MFNG O-fucosylpeptide 3-beta-N-acetylglucosaminyltransferase [Source:HGNC Symbol;Acc:HGNC:7038]	MFNG	0.0360391	-1.931	0.00321832	0.95476	0.998683	Unchanged
ENSG00000100065	protein_coding	caspase recruitment domain family member 10 [Source:HGNC Symbol;Acc:HGNC:16422]	CARD10	0.157422	2.60447	1.73222	0.188128	0.884048	Unchanged
ENSG00000100068	transcribed_unprocessed_pseudogene	LDL receptor related protein 5 like [Source:HGNC Symbol;Acc:HGNC:25323]	LRP5L	0.00741097	3.52613	0.00705085	0.933081	0.998208	Unchanged
ENSG00000100075	protein_coding	solute carrier family 25 member 1 [Source:HGNC Symbol;Acc:HGNC:10979]	SLC25A1	0.0132844	5.55065	0.0560661	0.812825	0.996176	Unchanged
ENSG00000100077	protein_coding	G protein-coupled receptor kinase 3 [Source:HGNC Symbol;Acc:HGNC:290]	GRK3	0.0496134	9.11259	1.64845	0.19917	0.89065	Unchanged
ENSG00000100083	protein_coding	golgi associated, gamma adaptin ear containing, ARF binding protein 1 [Source:HGNC Symbol;Acc:HGNC:17842]	GGA1	0.0536578	6.39907	1.20063	0.273196	0.914023	Unchanged
ENSG00000100084	protein_coding	histone cell cycle regulator [Source:HGNC Symbol;Acc:HGNC:4916]	HIRA	0.00476155	4.25466	0.00359594	0.952183	0.998208	Unchanged
ENSG00000100092	protein_coding	SH3 domain binding protein 1 [Source:HGNC Symbol;Acc:HGNC:10824]	SH3BP1	0.0589853	2.30689	0.177141	0.673842	0.98482	Unchanged
ENSG00000100095	protein_coding	seizure related 6 homolog like [Source:HGNC Symbol;Acc:HGNC:10763]	SEZ6L	-0.0460653	7.44416	1.41371	0.234441	0.90543	Unchanged
ENSG00000100097	protein_coding	galectin 1 [Source:HGNC Symbol;Acc:HGNC:6561]	LGALS1	-0.0433636	4.88956	0.305485	0.580464	0.980546	Unchanged
ENSG00000100099	protein_coding	HPS4 biogenesis of lysosomal organelles complex 3 subunit 2 [Source:HGNC Symbol;Acc:HGNC:15844]	HPS4	-0.00932991	6.12742	0.0426075	0.836466	0.996176	Unchanged
ENSG00000100100	protein_coding	phosphoinositide-3-kinase interacting protein 1 [Source:HGNC Symbol;Acc:HGNC:24942]	PIK3IP1	-0.122623	1.23325	0.404591	0.524728	0.97327	Unchanged
ENSG00000100104	protein_coding	SRR1 domain containing [Source:HGNC Symbol;Acc:HGNC:33910]	SRRD	-0.0784655	4.98376	1.91341	0.166585	0.873341	Unchanged
ENSG00000100105	protein_coding	POZ/BTB and AT hook containing zinc finger 1 [Source:HGNC Symbol;Acc:HGNC:13071]	PATZ1	0.0164157	6.56044	0.143318	0.705005	0.987435	Unchanged
ENSG00000100106	protein_coding	TRIO and F-actin binding protein [Source:HGNC Symbol;Acc:HGNC:17009]	TRIOBP	-0.0325468	5.37973	0.457143	0.498962	0.972467	Unchanged
ENSG00000100109	protein_coding	tuftelin interacting protein 11 [Source:HGNC Symbol;Acc:HGNC:17165]	TFIP11	0.0379214	5.40011	0.585163	0.444296	0.966495	Unchanged
ENSG00000100116	protein_coding	glycine C-acetyltransferase [Source:HGNC Symbol;Acc:HGNC:4188]	GCAT	0.019017	3.62382	0.0437605	0.8343	0.996176	Unchanged
ENSG00000100122	protein_coding	crystallin beta B1 [Source:HGNC Symbol;Acc:HGNC:2397]	CRYBB1	-0.269712	-1.49188	0.273046	0.601296	0.980546	Unchanged
ENSG00000100124	protein_coding	ankyrin repeat domain 54 [Source:HGNC Symbol;Acc:HGNC:25185]	ANKRD54	-0.0737172	4.6829	1.33549	0.247831	0.907228	Unchanged
ENSG00000100129	protein_coding	eukaryotic translation initiation factor 3 subunit L [Source:HGNC Symbol;Acc:HGNC:18138]	EIF3L	0.0123812	8.24023	0.107419	0.743102	0.990714	Unchanged
ENSG00000100138	protein_coding	small nuclear ribonucleoprotein 13 [Source:HGNC Symbol;Acc:HGNC:7819]	SNU13	0.0180995	6.22424	0.153214	0.695483	0.986578	Unchanged
ENSG00000100139	protein_coding	MICAL like 1 [Source:HGNC Symbol;Acc:HGNC:29804]	MICALL1	-0.0359886	5.3142	0.328131	0.566762	0.980269	Unchanged
ENSG00000100142	protein_coding	RNA polymerase II, I and III subunit F [Source:HGNC Symbol;Acc:HGNC:9193]	POLR2F	-0.0249045	4.32375	0.132013	0.716354	0.989826	Unchanged
ENSG00000100147	protein_coding	coiled-coil domain containing 134 [Source:HGNC Symbol;Acc:HGNC:26185]	CCDC134	0.0221437	3.9398	0.0742777	0.785207	0.993101	Unchanged
ENSG00000100150	protein_coding	DEP domain containing 5, GATOR1 subcomplex subunit [Source:HGNC Symbol;Acc:HGNC:18423]	DEPDC5	0.045699	4.2744	0.473207	0.491516	0.972467	Unchanged
ENSG00000100151	protein_coding	protein interacting with PRKCA 1 [Source:HGNC Symbol;Acc:HGNC:9394]	PICK1	0.0392231	4.17284	0.29555	0.586686	0.980546	Unchanged
ENSG00000100154	protein_coding	tetratricopeptide repeat domain 28 [Source:HGNC Symbol;Acc:HGNC:29179]	TTC28	0.0143293	7.27951	0.123617	0.725144	0.990209	Unchanged
ENSG00000100162	protein_coding	centromere protein M [Source:HGNC Symbol;Acc:HGNC:18352]	CENPM	-0.113037	2.94325	0.925752	0.335969	0.937079	Unchanged
ENSG00000100167	protein_coding	septin 3 [Source:HGNC Symbol;Acc:HGNC:10750]	SEPTIN3	0.0654828	5.90771	1.70064	0.192205	0.885784	Unchanged
ENSG00000100196	protein_coding	KDEL endoplasmic reticulum protein retention receptor 3 [Source:HGNC Symbol;Acc:HGNC:6306]	KDELR3	-0.43333	-0.371984	1.41071	0.234938	0.90543	Unchanged
ENSG00000100197	protein_coding	cytochrome P450 family 2 subfamily D member 6 [Source:HGNC Symbol;Acc:HGNC:2625]	CYP2D6	0.0635264	-0.668001	0.0312508	0.859682	0.998208	Unchanged
ENSG00000100201	protein_coding	DEAD-box helicase 17 [Source:HGNC Symbol;Acc:HGNC:2740]	DDX17	0.0282993	8.62888	0.777227	0.377991	0.94836	Unchanged
ENSG00000100206	protein_coding	DNA meiotic recombinase 1 [Source:HGNC Symbol;Acc:HGNC:2927]	DMC1	0.0260709	-0.340226	0.00651785	0.935654	0.998208	Unchanged
ENSG00000100207	protein_coding	transcription factor 20 [Source:HGNC Symbol;Acc:HGNC:11631]	TCF20	-0.0169727	6.12717	0.112139	0.737722	0.990209	Unchanged
ENSG00000100209	protein_coding	HscB mitochondrial iron-sulfur cluster cochaperone [Source:HGNC Symbol;Acc:HGNC:28913]	HSCB	0.0239813	3.04251	0.0575501	0.810411	0.996154	Unchanged
ENSG00000100211	protein_coding	chibby family member 1, beta catenin antagonist [Source:HGNC Symbol;Acc:HGNC:1307]	CBY1	-0.242311	2.95448	5.82257	0.0158218	0.547401	Unchanged
ENSG00000100216	protein_coding	translocase of outer mitochondrial membrane 22 [Source:HGNC Symbol;Acc:HGNC:18002]	TOMM22	-0.00320841	6.06777	0.00505634	0.943312	0.998208	Unchanged
ENSG00000100218	protein_coding	radial spoke head 14 homolog [Source:HGNC Symbol;Acc:HGNC:13437]	RSPH14	-0.0918362	-0.351063	0.083883	0.772103	0.993101	Unchanged
ENSG00000100219	protein_coding	X-box binding protein 1 [Source:HGNC Symbol;Acc:HGNC:12801]	XBP1	-0.124781	6.18685	4.58616	0.0322311	0.655462	Unchanged
ENSG00000100220	protein_coding	RNA 2',3'-cyclic phosphate and 5'-OH ligase [Source:HGNC Symbol;Acc:HGNC:26935]	RTCB	0.00481665	6.24955	0.0104692	0.918503	0.998208	Unchanged
ENSG00000100221	protein_coding	Josephin domain containing 1 [Source:HGNC Symbol;Acc:HGNC:28953]	JOSD1	0.0268897	5.26722	0.268015	0.604666	0.980546	Unchanged
ENSG00000100225	protein_coding	F-box protein 7 [Source:HGNC Symbol;Acc:HGNC:13586]	FBXO7	-0.00849241	6.54483	0.0434316	0.834915	0.996176	Unchanged
ENSG00000100226	protein_coding	GTP binding protein 1 [Source:HGNC Symbol;Acc:HGNC:4669]	GTPBP1	0.01733	5.76752	0.10881	0.741503	0.990714	Unchanged
ENSG00000100227	protein_coding	DNA polymerase delta interacting protein 3 [Source:HGNC Symbol;Acc:HGNC:23782]	POLDIP3	0.00509238	5.60599	0.0115978	0.914239	0.998208	Unchanged
ENSG00000100228	protein_coding	RAB36, member RAS oncogene family [Source:HGNC Symbol;Acc:HGNC:9775]	RAB36	-0.0335744	3.75485	0.126692	0.721887	0.990007	Unchanged
ENSG00000100234	protein_coding	TIMP metallopeptidase inhibitor 3 [Source:HGNC Symbol;Acc:HGNC:11822]	TIMP3	-0.0170058	3.75538	0.0349264	0.85175	0.998208	Unchanged
ENSG00000100239	protein_coding	protein phosphatase 6 regulatory subunit 2 [Source:HGNC Symbol;Acc:HGNC:19253]	PPP6R2	0.0686478	5.68287	1.44967	0.22858	0.901346	Unchanged
ENSG00000100241	protein_coding	SET binding factor 1 [Source:HGNC Symbol;Acc:HGNC:10542]	SBF1	-0.0258661	7.74377	0.371494	0.542191	0.976665	Unchanged
ENSG00000100242	protein_coding	Sad1 and UNC84 domain containing 2 [Source:HGNC Symbol;Acc:HGNC:14210]	SUN2	-0.0710874	4.14417	1.05957	0.303314	0.925788	Unchanged
ENSG00000100243	protein_coding	cytochrome b5 reductase 3 [Source:HGNC Symbol;Acc:HGNC:2873]	CYB5R3	-0.00236161	5.72926	0.00201893	0.964161	0.998791	Unchanged
ENSG00000100246	protein_coding	dynein axonemal light chain 4 [Source:HGNC Symbol;Acc:HGNC:2955]	DNAL4	-0.0716265	2.52549	0.362427	0.547161	0.978539	Unchanged
ENSG00000100258	protein_coding	lipase maturation factor 2 [Source:HGNC Symbol;Acc:HGNC:25096]	LMF2	0.0772818	5.18033	1.26987	0.259791	0.912292	Unchanged
ENSG00000100263	protein_coding	rhomboid domain containing 3 [Source:HGNC Symbol;Acc:HGNC:1308]	RHBDD3	-0.00386381	4.01146	0.00241045	0.960843	0.998791	Unchanged
ENSG00000100266	protein_coding	protein kinase C and casein kinase substrate in neurons 2 [Source:HGNC Symbol;Acc:HGNC:8571]	PACSIN2	0.0292079	5.18258	0.227684	0.633247	0.980546	Unchanged
ENSG00000100271	protein_coding	tubulin tyrosine ligase like 1 [Source:HGNC Symbol;Acc:HGNC:1312]	TTLL1	0.0894891	3.52448	0.986837	0.320517	0.93313	Unchanged
ENSG00000100280	protein_coding	adaptor related protein complex 1 subunit beta 1 [Source:HGNC Symbol;Acc:HGNC:554]	AP1B1	-0.0174001	6.78488	0.136844	0.711439	0.98813	Unchanged
ENSG00000100281	protein_coding	HMG-box containing 4 [Source:HGNC Symbol;Acc:HGNC:5003]	HMGXB4	0.07627	6.16992	3.4702	0.0624838	0.769446	Unchanged
ENSG00000100284	protein_coding	target of myb1 membrane trafficking protein [Source:HGNC Symbol;Acc:HGNC:11982]	TOM1	-0.0443647	3.54133	0.311739	0.576615	0.980546	Unchanged
ENSG00000100285	protein_coding	neurofilament heavy [Source:HGNC Symbol;Acc:HGNC:7737]	NEFH	-0.060587	6.17135	1.45917	0.227063	0.901346	Unchanged
ENSG00000100288	protein_coding	choline kinase beta [Source:HGNC Symbol;Acc:HGNC:1938]	CHKB	0.376239	0.688349	2.018	0.155444	0.868348	Unchanged
ENSG00000100292	protein_coding	heme oxygenase 1 [Source:HGNC Symbol;Acc:HGNC:5013]	HMOX1	0.212893	-0.971097	0.225134	0.635155	0.980779	Unchanged
ENSG00000100294	protein_coding	malonyl-CoA-acyl carrier protein transacylase [Source:HGNC Symbol;Acc:HGNC:29622]	MCAT	-0.0699279	2.72691	0.235739	0.627301	0.980546	Unchanged
ENSG00000100296	protein_coding	THO complex 5 [Source:HGNC Symbol;Acc:HGNC:19074]	THOC5	0.16419	6.69525	5.29056	0.0214413	0.597957	Unchanged
ENSG00000100297	protein_coding	minichromosome maintenance complex component 5 [Source:HGNC Symbol;Acc:HGNC:6948]	MCM5	0.0532644	7.40021	1.32811	0.249143	0.907936	Unchanged
ENSG00000100299	protein_coding	arylsulfatase A [Source:HGNC Symbol;Acc:HGNC:713]	ARSA	0.116022	3.51072	1.59056	0.207246	0.894806	Unchanged
ENSG00000100300	protein_coding	translocator protein [Source:HGNC Symbol;Acc:HGNC:1158]	TSPO	0.117212	3.41848	1.08091	0.298494	0.925619	Unchanged
ENSG00000100302	protein_coding	RASD family member 2 [Source:HGNC Symbol;Acc:HGNC:18229]	RASD2	0.0996517	-0.54003	0.0859585	0.769379	0.992936	Unchanged
ENSG00000100304	protein_coding	tubulin tyrosine ligase like 12 [Source:HGNC Symbol;Acc:HGNC:28974]	TTLL12	0.0375569	5.84733	0.568817	0.45073	0.968568	Unchanged
ENSG00000100307	protein_coding	chromobox 7 [Source:HGNC Symbol;Acc:HGNC:1557]	CBX7	-0.0682158	1.86621	0.179464	0.671834	0.98482	Unchanged
ENSG00000100314	protein_coding	calcium binding protein 7 [Source:HGNC Symbol;Acc:HGNC:20834]	CABP7	-0.0975959	-1.16515	0.0365454	0.848394	0.998123	Unchanged
ENSG00000100316	protein_coding	ribosomal protein L3 [Source:HGNC Symbol;Acc:HGNC:10332]	RPL3	0.0339521	9.87313	1.00876	0.315201	0.930972	Unchanged
ENSG00000100319	protein_coding	zinc finger matrin-type 5 [Source:HGNC Symbol;Acc:HGNC:28046]	ZMAT5	0.0541287	3.36405	0.275659	0.59956	0.980546	Unchanged
ENSG00000100320	protein_coding	RNA binding fox-1 homolog 2 [Source:HGNC Symbol;Acc:HGNC:9906]	RBFOX2	-0.0268014	9.17046	0.83041	0.362154	0.945863	Unchanged
ENSG00000100321	protein_coding	synaptogyrin 1 [Source:HGNC Symbol;Acc:HGNC:11498]	SYNGR1	-0.0289864	4.12088	0.194158	0.659478	0.983802	Unchanged
ENSG00000100324	protein_coding	TGF-beta activated kinase 1 (MAP3K7) binding protein 1 [Source:HGNC Symbol;Acc:HGNC:18157]	TAB1	-0.0158446	4.16139	0.0464896	0.829288	0.996176	Unchanged
ENSG00000100325	protein_coding	activating signal cointegrator 1 complex subunit 2 [Source:HGNC Symbol;Acc:HGNC:24103]	ASCC2	-0.0439685	5.87678	0.858402	0.354186	0.944619	Unchanged
ENSG00000100330	protein_coding	myotubularin related protein 3 [Source:HGNC Symbol;Acc:HGNC:7451]	MTMR3	0.0545443	5.82118	1.54525	0.213838	0.900706	Unchanged
ENSG00000100335	protein_coding	mitochondrial elongation factor 1 [Source:HGNC Symbol;Acc:HGNC:25979]	MIEF1	0.0251396	5.80162	0.318802	0.572329	0.980546	Unchanged
ENSG00000100336	protein_coding	apolipoprotein L4 [Source:HGNC Symbol;Acc:HGNC:14867]	APOL4	0.354035	0.0249169	1.18482	0.276377	0.916516	Unchanged
ENSG00000100344	protein_coding	patatin like phospholipase domain containing 3 [Source:HGNC Symbol;Acc:HGNC:18590]	PNPLA3	0.0639657	0.295712	0.0669188	0.795877	0.994515	Unchanged
ENSG00000100345	protein_coding	myosin heavy chain 9 [Source:HGNC Symbol;Acc:HGNC:7579]	MYH9	-0.0477678	7.93852	1.49585	0.221311	0.901346	Unchanged
ENSG00000100347	protein_coding	SAMM50 sorting and assembly machinery component [Source:HGNC Symbol;Acc:HGNC:24276]	SAMM50	-0.0398092	5.70464	0.606513	0.436104	0.964273	Unchanged
ENSG00000100348	protein_coding	thioredoxin 2 [Source:HGNC Symbol;Acc:HGNC:17772]	TXN2	0.0698918	5.57141	2.13715	0.143768	0.864353	Unchanged
ENSG00000100350	protein_coding	FAD dependent oxidoreductase domain containing 2 [Source:HGNC Symbol;Acc:HGNC:26264]	FOXRED2	-0.0546207	6.82771	1.42528	0.232536	0.904323	Unchanged
ENSG00000100353	protein_coding	eukaryotic translation initiation factor 3 subunit D [Source:HGNC Symbol;Acc:HGNC:3278]	EIF3D	0.0192908	7.14252	0.319646	0.57182	0.980546	Unchanged
ENSG00000100354	protein_coding	trinucleotide repeat containing adaptor 6B [Source:HGNC Symbol;Acc:HGNC:29190]	TNRC6B	-0.036893	6.41068	0.73159	0.392368	0.952462	Unchanged
ENSG00000100359	protein_coding	small G protein signaling modulator 3 [Source:HGNC Symbol;Acc:HGNC:25228]	SGSM3	0.00297752	-0.288086	8.35769e-05	0.992706	0.999523	Unchanged
ENSG00000100360	protein_coding	intraflagellar transport 27 [Source:HGNC Symbol;Acc:HGNC:18626]	IFT27	-0.0118907	5.2401	0.0371252	0.84721	0.998123	Unchanged
ENSG00000100364	protein_coding	KIAA0930 [Source:HGNC Symbol;Acc:HGNC:1314]	KIAA0930	-0.0236003	6.19114	0.261764	0.608911	0.980546	Unchanged
ENSG00000100372	protein_coding	solute carrier family 25 member 17 [Source:HGNC Symbol;Acc:HGNC:10987]	SLC25A17	-0.0140586	4.47395	0.0425686	0.83654	0.996176	Unchanged
ENSG00000100376	protein_coding	family with sequence similarity 118 member A [Source:HGNC Symbol;Acc:HGNC:1313]	FAM118A	-0.115004	5.01518	4.5744	0.0324531	0.655462	Unchanged
ENSG00000100379	protein_coding	potassium channel tetramerization domain containing 17 [Source:HGNC Symbol;Acc:HGNC:25705]	KCTD17	0.0325582	5.53159	0.341134	0.559175	0.979393	Unchanged
ENSG00000100380	protein_coding	ST13 Hsp70 interacting protein [Source:HGNC Symbol;Acc:HGNC:11343]	ST13	0.0240575	6.21691	0.312933	0.575886	0.980546	Unchanged
ENSG00000100387	protein_coding	ring-box 1 [Source:HGNC Symbol;Acc:HGNC:9928]	RBX1	0.013974	4.13299	0.0267547	0.870071	0.998208	Unchanged
ENSG00000100393	protein_coding	E1A binding protein p300 [Source:HGNC Symbol;Acc:HGNC:3373]	EP300	-0.0141239	6.87345	0.147824	0.700624	0.987004	Unchanged
ENSG00000100395	protein_coding	L3MBTL histone methyl-lysine binding protein 2 [Source:HGNC Symbol;Acc:HGNC:18594]	L3MBTL2	0.0432023	4.10177	0.313098	0.575785	0.980546	Unchanged
ENSG00000100401	protein_coding	Ran GTPase activating protein 1 [Source:HGNC Symbol;Acc:HGNC:9854]	RANGAP1	-0.0156766	6.46704	0.122886	0.725925	0.990209	Unchanged
ENSG00000100403	protein_coding	zinc finger CCCH-type containing 7B [Source:HGNC Symbol;Acc:HGNC:30869]	ZC3H7B	-0.0489858	6.49888	1.39748	0.237146	0.905984	Unchanged
ENSG00000100410	protein_coding	PHD finger protein 5A [Source:HGNC Symbol;Acc:HGNC:18000]	PHF5A	0.0553915	4.60312	0.793305	0.373103	0.946941	Unchanged
ENSG00000100412	protein_coding	aconitase 2 [Source:HGNC Symbol;Acc:HGNC:118]	ACO2	0.0113278	5.743	0.0496852	0.823612	0.996176	Unchanged
ENSG00000100413	protein_coding	RNA polymerase III subunit H [Source:HGNC Symbol;Acc:HGNC:30349]	POLR3H	0.0665376	5.06291	1.49025	0.222177	0.901346	Unchanged
ENSG00000100416	protein_coding	tRNA mitochondrial 2-thiouridylase [Source:HGNC Symbol;Acc:HGNC:25481]	TRMU	0.088113	5.94841	3.79756	0.0513272	0.724156	Unchanged
ENSG00000100417	protein_coding	phosphomannomutase 1 [Source:HGNC Symbol;Acc:HGNC:9114]	PMM1	0.0266218	2.77541	0.0468555	0.828628	0.996176	Unchanged
ENSG00000100418	protein_coding	desumoylating isopeptidase 1 [Source:HGNC Symbol;Acc:HGNC:24577]	DESI1	-0.0401255	4.38367	0.322489	0.570116	0.980546	Unchanged
ENSG00000100422	protein_coding	ceramide kinase [Source:HGNC Symbol;Acc:HGNC:19256]	CERK	-0.035981	7.24395	0.722347	0.395375	0.953136	Unchanged
ENSG00000100425	protein_coding	bromodomain containing 1 [Source:HGNC Symbol;Acc:HGNC:1102]	BRD1	-0.02293	6.45878	0.332546	0.564163	0.980269	Unchanged
ENSG00000100426	protein_coding	zinc finger BED-type containing 4 [Source:HGNC Symbol;Acc:HGNC:20721]	ZBED4	0.00824166	7.25685	0.0517782	0.819997	0.996176	Unchanged
ENSG00000100429	protein_coding	histone deacetylase 10 [Source:HGNC Symbol;Acc:HGNC:18128]	HDAC10	0.227236	1.10059	1.0197	0.312591	0.93049	Unchanged
ENSG00000100433	protein_coding	potassium two pore domain channel subfamily K member 10 [Source:HGNC Symbol;Acc:HGNC:6273]	KCNK10	0.0698794	1.52525	0.21578	0.642275	0.982227	Unchanged
ENSG00000100439	protein_coding	abhydrolase domain containing 4, N-acyl phospholipase B [Source:HGNC Symbol;Acc:HGNC:20154]	ABHD4	0.128326	2.33527	1.02707	0.310847	0.930419	Unchanged
ENSG00000100441	protein_coding	KH and NYN domain containing [Source:HGNC Symbol;Acc:HGNC:20166]	KHNYN	-0.0708403	5.49391	2.30915	0.128615	0.853326	Unchanged
ENSG00000100442	protein_coding	FKBP prolyl isomerase 3 [Source:HGNC Symbol;Acc:HGNC:3719]	FKBP3	-0.0145987	5.56973	0.089733	0.764517	0.992613	Unchanged
ENSG00000100445	protein_coding	short chain dehydrogenase/reductase family 39U member 1 [Source:HGNC Symbol;Acc:HGNC:20275]	SDR39U1	0.145437	4.79799	5.52795	0.018715	0.580076	Unchanged
ENSG00000100461	protein_coding	RNA binding motif protein 23 [Source:HGNC Symbol;Acc:HGNC:20155]	RBM23	0.00852916	6.34214	0.040244	0.841004	0.996482	Unchanged
ENSG00000100462	protein_coding	protein arginine methyltransferase 5 [Source:HGNC Symbol;Acc:HGNC:10894]	PRMT5	0.0231549	6.49934	0.343667	0.55772	0.979393	Unchanged
ENSG00000100473	protein_coding	cochlin [Source:HGNC Symbol;Acc:HGNC:2180]	COCH	0.00541968	5.22129	0.0120234	0.912686	0.998208	Unchanged
ENSG00000100478	protein_coding	adaptor related protein complex 4 subunit sigma 1 [Source:HGNC Symbol;Acc:HGNC:575]	AP4S1	0.114921	3.2101	1.72888	0.188554	0.884048	Unchanged
ENSG00000100479	protein_coding	DNA polymerase epsilon 2, accessory subunit [Source:HGNC Symbol;Acc:HGNC:9178]	POLE2	-0.0238332	4.87619	0.13257	0.715782	0.989751	Unchanged
ENSG00000100483	protein_coding	valosin containing protein lysine methyltransferase [Source:HGNC Symbol;Acc:HGNC:20352]	VCPKMT	-0.00740584	3.65483	0.00905263	0.924199	0.998208	Unchanged
ENSG00000100485	protein_coding	SOS Ras/Rho guanine nucleotide exchange factor 2 [Source:HGNC Symbol;Acc:HGNC:11188]	SOS2	0.0235877	6.3046	0.290957	0.589608	0.980546	Unchanged
ENSG00000100490	protein_coding	cyclin dependent kinase like 1 [Source:HGNC Symbol;Acc:HGNC:1781]	CDKL1	-0.00904599	2.78028	0.00519783	0.942526	0.998208	Unchanged
ENSG00000100503	protein_coding	ninein [Source:HGNC Symbol;Acc:HGNC:14906]	NIN	0.0256958	7.33056	0.364674	0.545922	0.97836	Unchanged
ENSG00000100504	protein_coding	glycogen phosphorylase L [Source:HGNC Symbol;Acc:HGNC:9725]	PYGL	-0.0143293	-0.263438	0.00235136	0.961325	0.998791	Unchanged
ENSG00000100505	protein_coding	tripartite motif containing 9 [Source:HGNC Symbol;Acc:HGNC:16288]	TRIM9	-0.205708	3.0065	3.93233	0.0473664	0.713261	Unchanged
ENSG00000100519	protein_coding	proteasome 26S subunit, ATPase 6 [Source:HGNC Symbol;Acc:HGNC:9553]	PSMC6	-0.0128985	6.10578	0.0786354	0.779155	0.993101	Unchanged
ENSG00000100522	protein_coding	glucosamine-phosphate N-acetyltransferase 1 [Source:HGNC Symbol;Acc:HGNC:19980]	GNPNAT1	0.046096	6.34867	1.2353	0.266379	0.914023	Unchanged
ENSG00000100523	protein_coding	DDHD domain containing 1 [Source:HGNC Symbol;Acc:HGNC:19714]	DDHD1	-0.0947345	6.14466	3.57259	0.0587405	0.753885	Unchanged
ENSG00000100526	protein_coding	cyclin dependent kinase inhibitor 3 [Source:HGNC Symbol;Acc:HGNC:1791]	CDKN3	0.131429	4.42076	4.03074	0.0446784	0.705042	Unchanged
ENSG00000100528	protein_coding	cornichon family AMPA receptor auxiliary protein 1 [Source:HGNC Symbol;Acc:HGNC:19431]	CNIH1	-0.076954	6.42402	2.55304	0.110082	0.833452	Unchanged
ENSG00000100532	protein_coding	cell growth regulator with ring finger domain 1 [Source:HGNC Symbol;Acc:HGNC:15528]	CGRRF1	-0.0921001	3.322	1.03072	0.309989	0.930419	Unchanged
ENSG00000100554	protein_coding	ATPase H+ transporting V1 subunit D [Source:HGNC Symbol;Acc:HGNC:13527]	ATP6V1D	-0.0339731	5.18046	0.377266	0.53907	0.97653	Unchanged
ENSG00000100564	protein_coding	phosphatidylinositol glycan anchor biosynthesis class H [Source:HGNC Symbol;Acc:HGNC:8964]	PIGH	-0.140796	3.6777	2.77815	0.0955587	0.819132	Unchanged
ENSG00000100567	protein_coding	proteasome 20S subunit alpha 3 [Source:HGNC Symbol;Acc:HGNC:9532]	PSMA3	-0.0102485	5.79539	0.0410979	0.839349	0.996274	Unchanged
ENSG00000100568	protein_coding	vesicle transport through interaction with t-SNAREs 1B [Source:HGNC Symbol;Acc:HGNC:17793]	VTI1B	0.00396514	6.49731	0.00897866	0.924509	0.998208	Unchanged
ENSG00000100575	protein_coding	translocase of inner mitochondrial membrane 9 [Source:HGNC Symbol;Acc:HGNC:11819]	TIMM9	-0.022132	4.43084	0.0964096	0.756182	0.992257	Unchanged
ENSG00000100577	protein_coding	glutathione S-transferase zeta 1 [Source:HGNC Symbol;Acc:HGNC:4643]	GSTZ1	0.121086	4.33101	3.15141	0.0758615	0.787018	Unchanged
ENSG00000100578	protein_coding	KIAA0586 [Source:HGNC Symbol;Acc:HGNC:19960]	KIAA0586	-0.150347	6.16845	10.158	0.00143675	0.222576	Unchanged
ENSG00000100580	protein_coding	transmembrane p24 trafficking protein family member 8 [Source:HGNC Symbol;Acc:HGNC:18633]	TMED8	-0.044522	6.84527	1.41507	0.234217	0.90543	Unchanged
ENSG00000100583	protein_coding	sterile alpha motif domain containing 15 [Source:HGNC Symbol;Acc:HGNC:18631]	SAMD15	-0.187826	2.36007	2.2632	0.13248	0.856297	Unchanged
ENSG00000100591	protein_coding	activator of HSP90 ATPase activity 1 [Source:HGNC Symbol;Acc:HGNC:1189]	AHSA1	-0.0276921	7.25733	0.507748	0.476115	0.969572	Unchanged
ENSG00000100592	protein_coding	dishevelled associated activator of morphogenesis 1 [Source:HGNC Symbol;Acc:HGNC:18142]	DAAM1	-0.132955	6.16668	7.40387	0.00650835	0.435641	Unchanged
ENSG00000100596	protein_coding	serine palmitoyltransferase long chain base subunit 2 [Source:HGNC Symbol;Acc:HGNC:11278]	SPTLC2	-0.0143968	7.10527	0.146438	0.701963	0.987156	Unchanged
ENSG00000100600	protein_coding	legumain [Source:HGNC Symbol;Acc:HGNC:9472]	LGMN	0.0573675	4.39046	0.783573	0.376051	0.948036	Unchanged
ENSG00000100601	protein_coding	alkB homolog 1, histone H2A dioxygenase [Source:HGNC Symbol;Acc:HGNC:17911]	ALKBH1	0.0487625	4.00851	0.384664	0.535117	0.976132	Unchanged
ENSG00000100603	protein_coding	SNW domain containing 1 [Source:HGNC Symbol;Acc:HGNC:16696]	SNW1	-0.0199722	6.68086	0.227172	0.633628	0.980546	Unchanged
ENSG00000100604	protein_coding	chromogranin A [Source:HGNC Symbol;Acc:HGNC:1929]	CHGA	-0.0370512	9.05852	0.654607	0.41847	0.95664	Unchanged
ENSG00000100605	protein_coding	inositol-tetrakisphosphate 1-kinase [Source:HGNC Symbol;Acc:HGNC:6177]	ITPK1	0.0603453	5.95341	1.30973	0.252443	0.91002	Unchanged
ENSG00000100612	protein_coding	dehydrogenase/reductase 7 [Source:HGNC Symbol;Acc:HGNC:21524]	DHRS7	-0.00929267	5.55638	0.0360412	0.84943	0.998179	Unchanged
ENSG00000100614	protein_coding	protein phosphatase, Mg2+/Mn2+ dependent 1A [Source:HGNC Symbol;Acc:HGNC:9275]	PPM1A	-0.00961791	7.22099	0.0634087	0.801187	0.994954	Unchanged
ENSG00000100625	protein_coding	SIX homeobox 4 [Source:HGNC Symbol;Acc:HGNC:10890]	SIX4	-0.182929	-0.701297	0.273094	0.601264	0.980546	Unchanged
ENSG00000100626	protein_coding	polypeptide N-acetylgalactosaminyltransferase 16 [Source:HGNC Symbol;Acc:HGNC:23233]	GALNT16	-0.0290685	3.71461	0.116274	0.733111	0.990209	Unchanged
ENSG00000100629	protein_coding	centrosomal protein 128 [Source:HGNC Symbol;Acc:HGNC:20359]	CEP128	-0.0237876	4.90251	0.123569	0.725195	0.990209	Unchanged
ENSG00000100632	protein_coding	ERH mRNA splicing and mitosis factor [Source:HGNC Symbol;Acc:HGNC:3447]	ERH	0.0170102	7.31931	0.186427	0.665907	0.984459	Unchanged
ENSG00000100644	protein_coding	hypoxia inducible factor 1 subunit alpha [Source:HGNC Symbol;Acc:HGNC:4910]	HIF1A	-0.00765337	7.94132	0.0458217	0.8305	0.996176	Unchanged
ENSG00000100647	protein_coding	sushi domain containing 6 [Source:HGNC Symbol;Acc:HGNC:19956]	SUSD6	-0.225685	3.73522	6.24463	0.0124571	0.516411	Unchanged
ENSG00000100650	protein_coding	serine and arginine rich splicing factor 5 [Source:HGNC Symbol;Acc:HGNC:10787]	SRSF5	0.142009	7.61382	10.1547	0.00143937	0.222576	Unchanged
ENSG00000100664	protein_coding	eukaryotic translation initiation factor 5 [Source:HGNC Symbol;Acc:HGNC:3299]	EIF5	0.0912579	8.20854	7.7222	0.0054546	0.415326	Unchanged
ENSG00000100678	protein_coding	solute carrier family 8 member A3 [Source:HGNC Symbol;Acc:HGNC:11070]	SLC8A3	0.0545405	5.2713	0.85099	0.356272	0.944807	Unchanged
ENSG00000100697	protein_coding	dicer 1, ribonuclease III [Source:HGNC Symbol;Acc:HGNC:17098]	DICER1	-0.0663315	7.59446	2.54124	0.110908	0.835624	Unchanged
ENSG00000100711	protein_coding	zinc finger FYVE-type containing 21 [Source:HGNC Symbol;Acc:HGNC:20760]	ZFYVE21	-0.0268176	3.949	0.0748917	0.784343	0.993101	Unchanged
ENSG00000100714	protein_coding	methylenetetrahydrofolate dehydrogenase, cyclohydrolase and formyltetrahydrofolate synthetase 1 [Source:HGNC Symbol;Acc:HGNC:7432]	MTHFD1	0.0168441	7.26336	0.235219	0.627681	0.980546	Unchanged
ENSG00000100722	protein_coding	zinc finger CCCH-type containing 14 [Source:HGNC Symbol;Acc:HGNC:20509]	ZC3H14	-0.0822747	6.96046	4.51202	0.0336576	0.659555	Unchanged
ENSG00000100726	protein_coding	telomere maintenance 2 [Source:HGNC Symbol;Acc:HGNC:29099]	TELO2	0.0310785	5.00041	0.209527	0.647138	0.982638	Unchanged
ENSG00000100731	protein_coding	pecanex 1 [Source:HGNC Symbol;Acc:HGNC:19740]	PCNX1	-0.0467279	7.24821	1.71387	0.190484	0.884529	Unchanged
ENSG00000100744	protein_coding	GSK3B interacting protein [Source:HGNC Symbol;Acc:HGNC:20343]	GSKIP	0.0281878	4.99836	0.240958	0.623515	0.980546	Unchanged
ENSG00000100749	protein_coding	VRK serine/threonine kinase 1 [Source:HGNC Symbol;Acc:HGNC:12718]	VRK1	0.0135707	5.91112	0.0963623	0.75624	0.992257	Unchanged
ENSG00000100764	protein_coding	proteasome 26S subunit, ATPase 1 [Source:HGNC Symbol;Acc:HGNC:9547]	PSMC1	0.0754097	5.13725	1.81884	0.177452	0.879383	Unchanged
ENSG00000100784	protein_coding	ribosomal protein S6 kinase A5 [Source:HGNC Symbol;Acc:HGNC:10434]	RPS6KA5	-0.018897	5.43429	0.0558767	0.813136	0.996176	Unchanged
ENSG00000100796	protein_coding	protein phosphatase 4 regulatory subunit 3A [Source:HGNC Symbol;Acc:HGNC:20219]	PPP4R3A	-0.00534395	7.08693	0.0155953	0.900618	0.998208	Unchanged
ENSG00000100802	protein_coding	chromosome 14 open reading frame 93 [Source:HGNC Symbol;Acc:HGNC:20162]	C14orf93	0.0372335	4.15252	0.285997	0.592797	0.980546	Unchanged
ENSG00000100804	protein_coding	proteasome 20S subunit beta 5 [Source:HGNC Symbol;Acc:HGNC:9542]	PSMB5	0.0314429	6.66408	0.569016	0.45065	0.968568	Unchanged
ENSG00000100811	protein_coding	YY1 transcription factor [Source:HGNC Symbol;Acc:HGNC:12856]	YY1	-0.00780855	7.68103	0.0519932	0.819631	0.996176	Unchanged
ENSG00000100813	protein_coding	apoptotic chromatin condensation inducer 1 [Source:HGNC Symbol;Acc:HGNC:17066]	ACIN1	0.0132538	8.03026	0.131175	0.717217	0.989826	Unchanged
ENSG00000100814	protein_coding	cyclin B1 interacting protein 1 [Source:HGNC Symbol;Acc:HGNC:19437]	CCNB1IP1	0.0452176	6.71959	1.44129	0.22993	0.903139	Unchanged
ENSG00000100815	protein_coding	thyroid hormone receptor interactor 11 [Source:HGNC Symbol;Acc:HGNC:12305]	TRIP11	-0.0522879	6.10965	0.624977	0.429204	0.960496	Unchanged
ENSG00000100823	protein_coding	apurinic/apyrimidinic endodeoxyribonuclease 1 [Source:HGNC Symbol;Acc:HGNC:587]	APEX1	0.0174065	7.30313	0.230799	0.630932	0.980546	Unchanged
ENSG00000100836	protein_coding	poly(A) binding protein nuclear 1 [Source:HGNC Symbol;Acc:HGNC:8565]	PABPN1	0.0995341	5.00616	1.69458	0.192998	0.886286	Unchanged
ENSG00000100842	protein_coding	embryonal Fyn-associated substrate [Source:HGNC Symbol;Acc:HGNC:16898]	EFS	-0.0291834	6.22347	0.283843	0.594194	0.980546	Unchanged
ENSG00000100852	protein_coding	Rho GTPase activating protein 5 [Source:HGNC Symbol;Acc:HGNC:675]	ARHGAP5	-0.0998956	6.68113	5.0047	0.0252785	0.622618	Unchanged
ENSG00000100865	protein_coding	cyclin dependent kinase 2 interacting protein [Source:HGNC Symbol;Acc:HGNC:23789]	CINP	-0.0360769	4.70638	0.308554	0.578569	0.980546	Unchanged
ENSG00000100867	protein_coding	dehydrogenase/reductase 2 [Source:HGNC Symbol;Acc:HGNC:18349]	DHRS2	0.020493	0.245935	0.00738071	0.931537	0.998208	Unchanged
ENSG00000100883	protein_coding	signal recognition particle 54 [Source:HGNC Symbol;Acc:HGNC:11301]	SRP54	-0.0512248	6.45179	1.64156	0.200111	0.890671	Unchanged
ENSG00000100888	protein_coding	chromodomain helicase DNA binding protein 8 [Source:HGNC Symbol;Acc:HGNC:20153]	CHD8	-0.0551191	7.79955	2.65867	0.102987	0.828616	Unchanged
ENSG00000100889	protein_coding	phosphoenolpyruvate carboxykinase 2, mitochondrial [Source:HGNC Symbol;Acc:HGNC:8725]	PCK2	0.0674852	5.52003	1.49046	0.222145	0.901346	Unchanged
ENSG00000100890	protein_coding	protein only RNase P catalytic subunit [Source:HGNC Symbol;Acc:HGNC:19958]	PRORP	0.0514637	4.03941	0.381878	0.5366	0.976159	Unchanged
ENSG00000100897	protein_coding	DDB1 and CUL4 associated factor 11 [Source:HGNC Symbol;Acc:HGNC:20258]	DCAF11	0.0227314	5.35935	0.23464	0.628105	0.980546	Unchanged
ENSG00000100902	protein_coding	proteasome 20S subunit alpha 6 [Source:HGNC Symbol;Acc:HGNC:9535]	PSMA6	-0.013952	3.04807	0.0216027	0.883149	0.998208	Unchanged
ENSG00000100906	protein_coding	NFKB inhibitor alpha [Source:HGNC Symbol;Acc:HGNC:7797]	NFKBIA	-0.0117289	4.7702	0.0401238	0.841239	0.996482	Unchanged
ENSG00000100908	protein_coding	ER membrane protein complex subunit 9 [Source:HGNC Symbol;Acc:HGNC:20273]	EMC9	-0.00117491	3.5443	0.000205209	0.988571	0.999523	Unchanged
ENSG00000100911	protein_coding	proteasome activator subunit 2 [Source:HGNC Symbol;Acc:HGNC:9569]	PSME2	0.127612	5.1223	5.3939	0.0202073	0.59378	Unchanged
ENSG00000100916	protein_coding	BRMS1 like transcriptional repressor [Source:HGNC Symbol;Acc:HGNC:20512]	BRMS1L	0.0126587	4.91224	0.0513099	0.820799	0.996176	Unchanged
ENSG00000100918	protein_coding	REC8 meiotic recombination protein [Source:HGNC Symbol;Acc:HGNC:16879]	REC8	-0.0327441	6.21635	0.484334	0.486466	0.971573	Unchanged
ENSG00000100926	protein_coding	transmembrane 9 superfamily member 1 [Source:HGNC Symbol;Acc:HGNC:11864]	TM9SF1	-0.158677	2.2612	1.31415	0.251645	0.91002	Unchanged
ENSG00000100934	protein_coding	SEC23 homolog A, COPII coat complex component [Source:HGNC Symbol;Acc:HGNC:10701]	SEC23A	0.00531265	5.70049	0.0119385	0.912994	0.998208	Unchanged
ENSG00000100938	protein_coding	guanosine monophosphate reductase 2 [Source:HGNC Symbol;Acc:HGNC:4377]	GMPR2	0.0173726	5.43665	0.10766	0.742824	0.990714	Unchanged
ENSG00000100941	protein_coding	pinin, desmosome associated protein [Source:HGNC Symbol;Acc:HGNC:9162]	PNN	0.0612052	6.96272	1.88428	0.169848	0.875141	Unchanged
ENSG00000100949	protein_coding	Rab geranylgeranyltransferase subunit alpha [Source:HGNC Symbol;Acc:HGNC:9795]	RABGGTA	0.199739	3.75219	5.97366	0.0145211	0.538913	Unchanged
ENSG00000100968	protein_coding	nuclear factor of activated T cells 4 [Source:HGNC Symbol;Acc:HGNC:7778]	NFATC4	-0.0164351	3.3351	0.0270749	0.869303	0.998208	Unchanged
ENSG00000100979	protein_coding	phospholipid transfer protein [Source:HGNC Symbol;Acc:HGNC:9093]	PLTP	0.0737394	4.18888	1.15015	0.283518	0.919318	Unchanged
ENSG00000100982	protein_coding	phosphorylated CTD interacting factor 1 [Source:HGNC Symbol;Acc:HGNC:16200]	PCIF1	0.0289195	5.08886	0.280371	0.596458	0.980546	Unchanged
[truncated: 17,477 more rows]
